# Supplementary material for: Equus caballus Papillomavirus Type-9 (EcPV9): First Detection in Asymptomatic Italian Horses
Source: MDPI journal article supplement (doi:10.3390/v14092050), 2022-09-15
Supplement: s1 [file s1]

**Table S1:** Samples positive for the detection of EcPV9-L1 and EcPV2-L1 by Real Time PCR. Breed, age, sex and origin of sampled animals are reported in the table

| ID    | EcPV9-L1<br>Cq $\pm$ 1SD | EcPV2-L1<br>Cq $\pm$ 1SD | Breed                | Age  | Sex | Origin                 |
|-------|--------------------------|--------------------------|----------------------|------|-----|------------------------|
| ID71  | 31.59 $\pm$ 3.33         | 23.8 $\pm$ 1.0           | Shire                | 10.0 | F   | Pralormo, Piedmont     |
| ID18A | 35.76 $\pm$ 0.34         | >38.00                   | English thoroughbred | N.A. | F   | Vigone, Piedmont       |
| ID143 | 35.72 $\pm$ 0.65         | >38.00                   | English thoroughbred | 10.0 | F   | Pisa, Tuscany          |
| ID151 | 35.42 $\pm$ 0.66         | >38.00                   | English thoroughbred | 8.0  | F   | Vigone, Piedmont       |
| ID107 | 28.79 $\pm$ 0.74         | 32.4 $\pm$ 0.2           | English thoroughbred | 9.0  | F   | Vigone, Piedmont       |
| ID134 | 29.20 $\pm$ 0.17         | 26.9 $\pm$ 1.5           | English thoroughbred | 9.0  | F   | Faenza, Emilia Romagna |
| ID149 | 33.62 $\pm$ 0.54         | 32.7 $\pm$ 1.2           | English thoroughbred | 15.0 | F   | Umbertide, Umbria      |
| ID163 | 33.60 $\pm$ 0.56         | 35.3 $\pm$ 0.6           | English thoroughbred | 8.0  | F   | Umbertide, Umbria      |
| ID166 | 30.01 $\pm$ 0.27         | 16.5 $\pm$ 0.5           | English thoroughbred | 11.0 | F   | Noceto, Emilia Romagna |
| ID10A | 32.87 $\pm$ 0.36         | 33.59 $\pm$ 1.84         | English thoroughbred | 11.0 | F   | Pralormo, Piedmont     |
| ID75  | 27.85 $\pm$ 0.22         | >38.00                   | English thoroughbred | 21.0 | F   | Siracusa, Sicily       |
