# Supplementary material for: Equus caballus Papillomavirus Type-9 (EcPV9): First Detection in Asymptomatic Italian Horses
Source: MDPI journal article supplement (doi:10.3390/v14092050), 2022-09-15

**Figure S2:** Raw reads aligned to the reconstructed EcPV2 or EcPV9 genome and visualized through the Integrative Genome Viewer (IGV)

**a) ID2396 2-2 raw reads aligned to the reconstructed EcPV2**

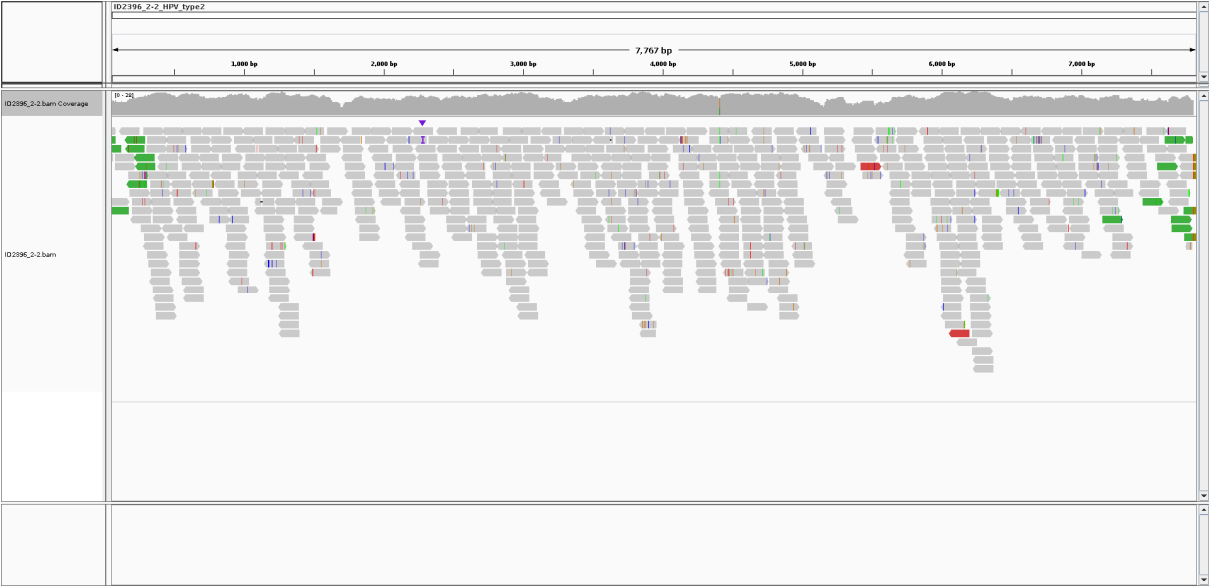

**b) ID2396 3-3 raw reads aligned to the reconstructed EcPV2**

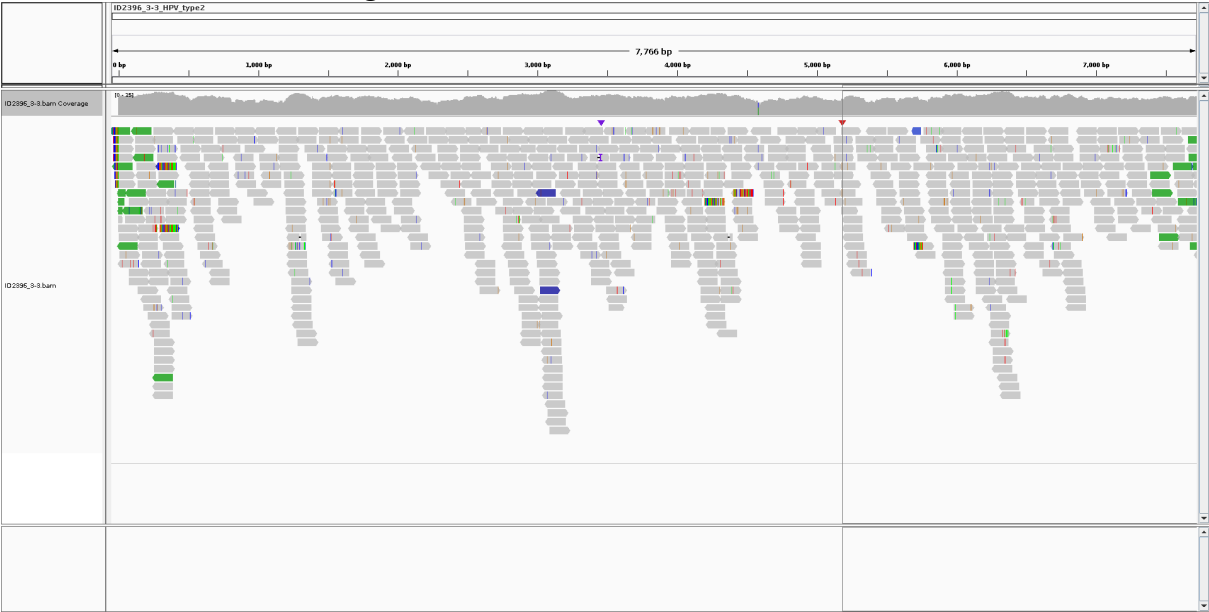

c) ID2396 5-5 raw reads aligned to the reconstructed EcPV2

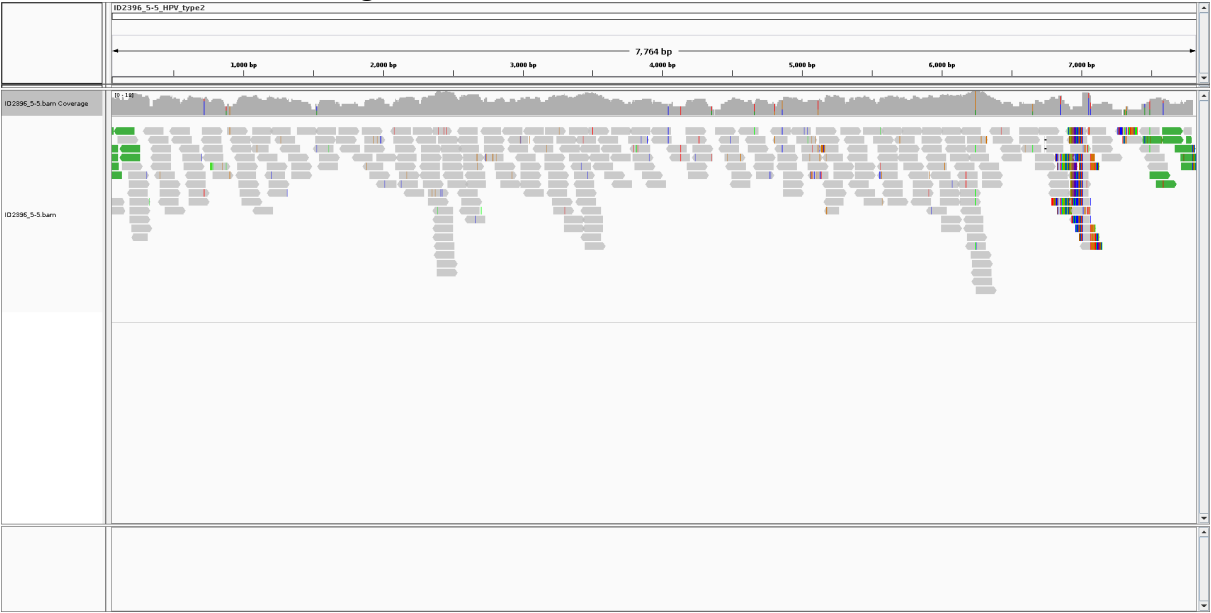

d) ID2396 8-8 raw reads aligned to the reconstructed EcPV2

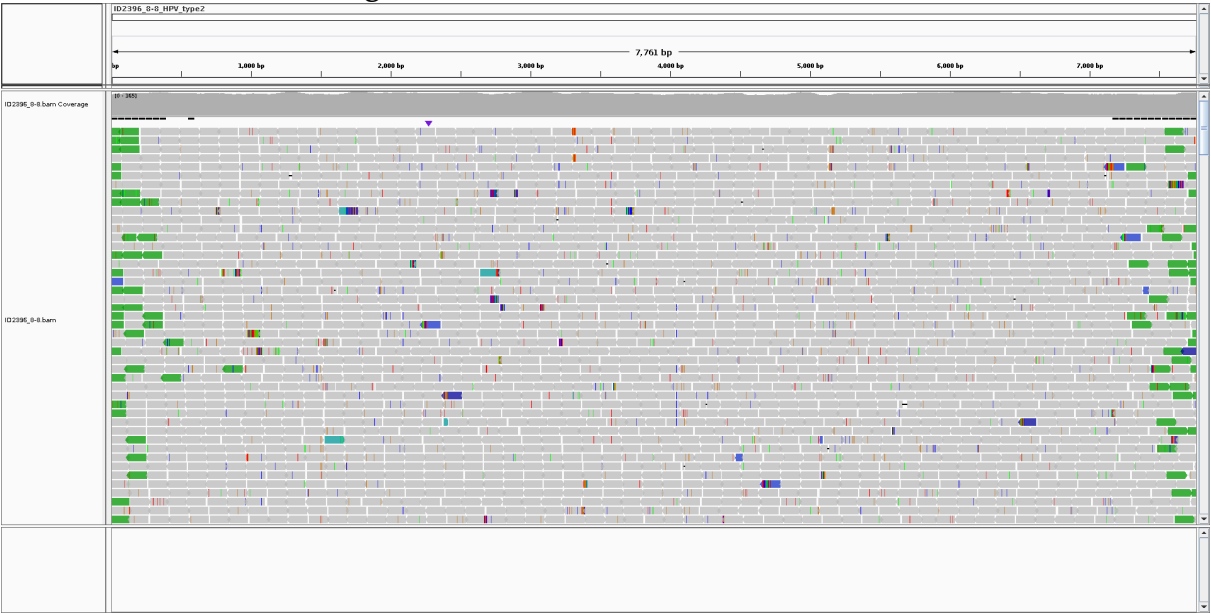

e) ID2396 13-13 raw reads aligned to the reconstructed EcPV9

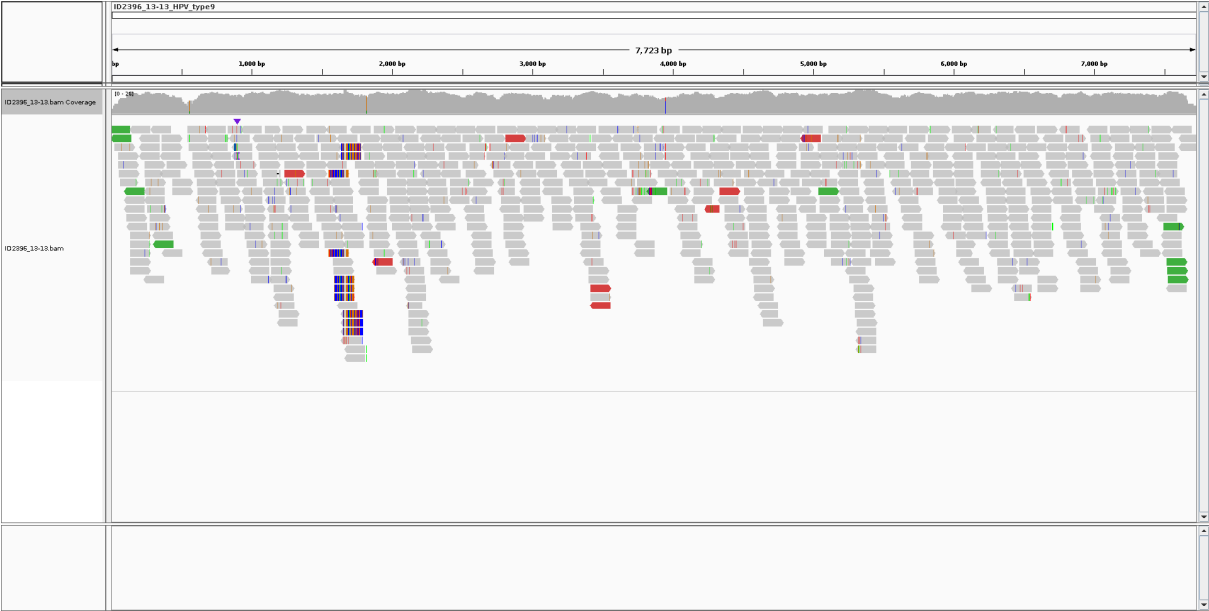

f) ID2396 14-14 raw reads aligned to the reconstructed EcPV9

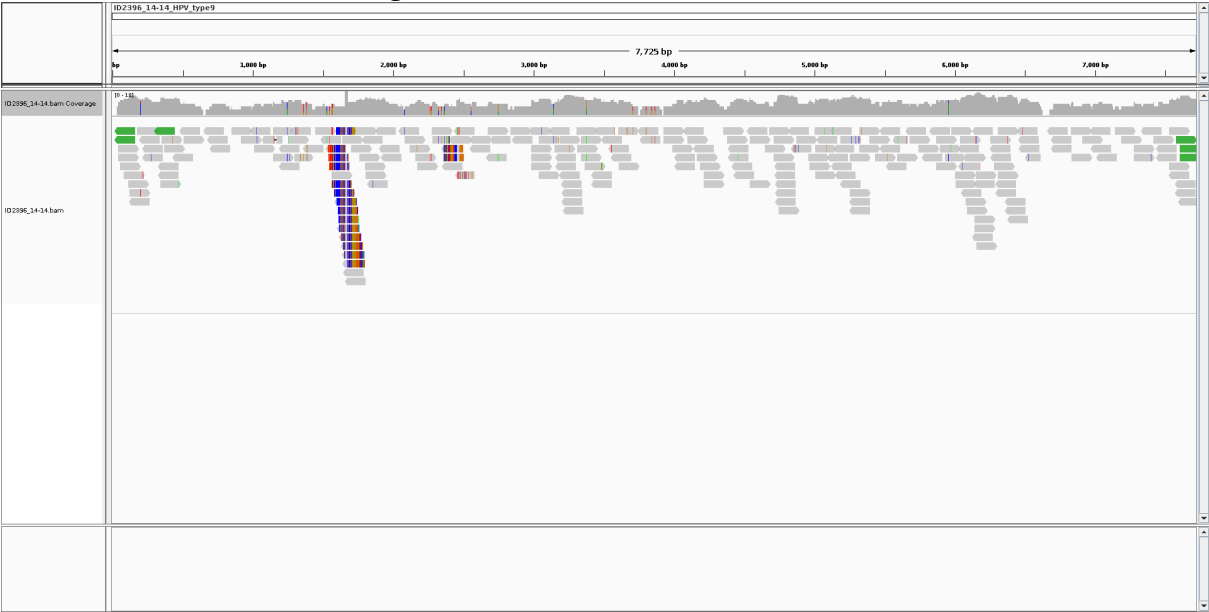

Supplement: s1 [file s1]
