# Supplementary material for: Equus caballus Papillomavirus Type-9 (EcPV9): First Detection in Asymptomatic Italian Horses
Source: MDPI journal article supplement (doi:10.3390/v14092050), 2022-09-15
Supplement: s1 [file s1]

**Table S2:** Follow-up of horses positive for EcPV9 and EcPV2

| ID       | EcPV9-L1 | EcPV2-L1 | Follow up                                                       |
|----------|----------|----------|-----------------------------------------------------------------|
| ID71     | +        | +        | Not pregnant after insemination                                 |
| ID18A    | +        | -        | Death following laminitis postpartum                            |
| ID143-17 | +        | -        | Eutocic delivery                                                |
| ID151-2  | +        | -        | Occurrence of endometrial cysts; death following colic syndrome |
| ID107    | +        | +        | Eutocic delivery                                                |
| ID134    | +        | +        | Occurrence of embryonal resorption                              |
| ID149    | +        | +        | Occurrence of embryonal resorption                              |
| ID163-17 | +        | +        | Occurrence of abortion                                          |
| ID166-17 | +        | +        | Eutocic delivery                                                |
| ID10A    | +        | +        | Occurrence of embryonal resorption                              |
| ID75     | +        | -        | Not pregnant after insemination                                 |
