# Supplementary material for: Equus caballus Papillomavirus Type-9 (EcPV9): First Detection in Asymptomatic Italian Horses
Source: MDPI journal article supplement (doi:10.3390/v14092050), 2022-09-15
Supplement: s1 [file s1]

**Table S3:** NGS data analysis summary

| Sample Name  | Geographic origin      | Total raw reads | Total trimmed reads | Total filtered reads | Coverage     | Depth coverage |
|--------------|------------------------|-----------------|---------------------|----------------------|--------------|----------------|
| ID2396_2-2   | Pralormo, Piemonte     | 25.677.870      | 18.960.896          | 512.666              | 100% EcPV2   | 12,11x         |
| ID2396_3-3   | Pralormo, Piemonte     | 27.288.860      | 19.722.286          | 547.602              | 100% EcPV2   | 13,4x          |
| ID2396_5-5   | Umbertide, Umbria      | 27.961.200      | 21.785.468          | 384.060              | 97.96% EcPV2 | 6,04x          |
| ID2396_8-8   | Noceto, Emilia Romagna | 25.021.288      | 17.491.538          | 605.984              | 100% EcPV2   | 211,76x        |
| ID2396_13-13 | Siracusa, Sicilia      | 23.565.674      | 17.322.080          | 352.554              | 99.9% EcPV9  | 12.91x         |
| ID2396_14-14 | Vigone, Piemonte       | 21.529.102      | 14.806.828          | 203.626              | 98.13% EcPV9 | 4.14x          |
