# Supplementary material for: Equus caballus Papillomavirus Type-9 (EcPV9): First Detection in Asymptomatic Italian Horses
Source: Viruses. 2022 Sep 15;14(9):2050. doi: 10.3390/v14092050 (PMC9504741; doi:10.3390/v14092050)
Supplement: Supplementary file 1 [file viruses-14-02050-s001.zip]

Archive with 8 entries (8 files):
- supplementary/Figure S1.pdf
- supplementary/Figure S2.pdf
- supplementary/Figure S3.jpg
- supplementary/Figure S4.gif
- supplementary/Table S1.pdf
- supplementary/Table S2.pdf
- supplementary/Table S3.pdf
- supplementary/TableS4.xlsx
