# Supplementary material for: Equus caballus Papillomavirus Type-9 (EcPV9): First Detection in Asymptomatic Italian Horses
Source: Viruses. 2022 Sep 15;14(9):2050. doi: 10.3390/v14092050 (PMC9504741; doi:10.3390/v14092050)
Supplement: Supplementary file 1 [file viruses-14-02050-s001.zip › supplementary/TableS4.xlsx]

## Sheet: ID2396_2-2
qseq ID	qlen	qstart	qend	subject ID	sstart	send	len	pident	evalue	seq
Equus_caballus_papillomavirus_2_isolate_XJ-ks1391_complete_genome_MW410986.1	7802	1	4476	NODE_63_length_7931_cov_5.291698	3455	7931	4477	99.866	0	CGAGATGCCAAGCAGGCCAGTGCCCGCCAAGAGCTTTGGCGCTCTCTTCTGGTTACTTTGGCGCTGCACCCAGCCAATCTGCAGACTGGGTCTTTGTGAGTCAGCGAATCCTCTGCGGTGCACAGAGCCTTTTTCTAGAGAAGATTGTTGTGGACCACAATCATTAAGATATGCAGGAGGCCCCTGCATCGGAGACGTTCCGCGGAGCTCCAGAGGGAGAGTGAAGACTGCTGGCCACATGTCGATCGTTGGCCTTCTTTGCATCTTTTGTGGAAAGCCGTGTGGCTATGCTGATGACATTTGGTGGAACACAGCAGACCTGAACCTGGTTATGAGAGACGGCAAGCGCAAGGCCAGCTGCCAGACCTGCATGAGAGCAGCCTGCACGCTTGAGCGCCA…
Equine_papillomavirus_2_complete_genome_EU503122.1	7802	1	4476	NODE_63_length_7931_cov_5.291698	3455	7931	4477	99.866	0	CGAGATGCCAAGCAGGCCAGTGCCCGCCAAGAGCTTTGGCGCTCTCTTCTGGTTACTTTGGCGCTGCACCCAGCCAATCTGCAGACTGGGTCTTTGTGAGTCAGCGAATCCTCTGCGGTGCACAGAGCCTTTTTCTAGAGAAGATTGTTGTGGACCACAATCATTAAGATATGCAGGAGGCCCCTGCATCGGAGACGTTCCGCGGAGCTCCAGAGGGAGAGTGAAGACTGCTGGCCACATGTCGATCGTTGGCCTTCTTTGCATCTTTTGTGGAAAGCCGTGTGGCTATGCTGATGACATTTGGTGGAACACAGCAGACCTGAACCTGGTTATGAGAGACGGCAAGCGCAAGGCCAGCTGCCAGACCTGCATGAGAGCAGCCTGCACGCTTGAGCGCCA…
Equine_papillomavirus_2_complete_genome_NC_012123.1	7802	1	4476	NODE_63_length_7931_cov_5.291698	3455	7931	4477	99.866	0	CGAGATGCCAAGCAGGCCAGTGCCCGCCAAGAGCTTTGGCGCTCTCTTCTGGTTACTTTGGCGCTGCACCCAGCCAATCTGCAGACTGGGTCTTTGTGAGTCAGCGAATCCTCTGCGGTGCACAGAGCCTTTTTCTAGAGAAGATTGTTGTGGACCACAATCATTAAGATATGCAGGAGGCCCCTGCATCGGAGACGTTCCGCGGAGCTCCAGAGGGAGAGTGAAGACTGCTGGCCACATGTCGATCGTTGGCCTTCTTTGCATCTTTTGTGGAAAGCCGTGTGGCTATGCTGATGACATTTGGTGGAACACAGCAGACCTGAACCTGGTTATGAGAGACGGCAAGCGCAAGGCCAGCTGCCAGACCTGCATGAGAGCAGCCTGCACGCTTGAGCGCCA…
Equine_papillomavirus_2_isolate_Zurich_2009_HM461973.1_complete_genome	7803	2	4477	NODE_63_length_7931_cov_5.291698	3456	7931	4476	99.352	0	GAGATGCCAAGCAGGCCAGTGCCCGCCAAGAGCTTTGGCGCTCTCTTCTGGTTACTTTGGCGCTGCACCCAGCCAATCTGCAGACTGGGTCTTTGTGAGTCAGCGAATCCTCTGCGGTGCACAGAGCCTTTTTCTAGAGAAGATTGTTGTGGACCACAATCATTAAGATATGCAGGAGGCCCCTGCATCGGAGACGTTCCGCGGAGCTCCAGAGGGAGAGTGAAGACTGCTGGCCACATGTCGATCGTTGGCCTTCTTTGCATCTTTTGTGGAAAGCCGTGTGGCTATGCTGATGACATTTGGTGGAACACAGCAGACCTGAACCTGGTTATGAGAGACGGCAAGCGCAAGGCCAGCTGCCAGACCTGCATGAGAGCAGCCTGCACGCTTGAGCGCCAT…
Equus_caballus_papillomavirus_2_isolate_XJ-ks1391_complete_genome_MW410986.1	7802	4349	7802	NODE_63_length_7931_cov_5.291698	1	3454	3454	99.826	0	ATTGGCACTGGAAGAGGTGGGACGGGAGGAAGGCTTGGGTACCAGCCTGTGGGGCGCGGGGTTGCTCAGGGGGGCGGCAGTGTCCGCGTGGGCACCCCCGTGTCTGTGCTGGAGCCCGGTGTAGGAGTGGAGACGGTGGGACCAAAGGACCTGGTGCCAGTGGACGCCTTGGGGCCCACCACTCCCTCTGTGGTGCCCCTGGGTGAGGGGGATGCCCTGGCGCCAGGCGTGGAAATCTCTGCGGAGGTGCACCCCACGTTTGACCCCACAGCGGCTGGTGGTGCAGGAGGGGTGTCCTCCTCCGGGGGCGAGGCTGCGGTGCTCGAGGTCCCCCCTCAGGTGCAGCCAAGGCCGAGAGGCGGGGTTAGCCGCAGTCAATTCCACAACCCTGCTTTTCAG…
Equine_papillomavirus_2_isolate_Zurich_2009_HM461973.1_complete_genome	7803	4350	7803	NODE_63_length_7931_cov_5.291698	1	3454	3454	98.552	0	ATTGGCACTGGAAGAGGTGGGACGGGAGGAAGGCTTGGGTACCAGCCTGTGGGGCGCGGGGTTGCTCAGGGGGGCGGCAGTGTCCGCGTGGGCACCCCCGTGTCTGTGCTGGAGCCCGGTGTAGGAGTGGAGACGGTGGGACCAAAGGACCTGGTGCCAGTGGACGCCTTGGGGCCCACCACTCCCTCTGTGGTGCCCCTGGGTGAGGGGGATGCCCTGGCGCCAGGCGTGGAAATCTCTGCGGAGGTGCACCCCACGTTTGACCCCACAGCGGCTGGTGGTGCAGGAGGGGTGTCCTCCTCCGGGGGCGAGGCTGCGGTGCTCGAGGTCCCCCCTCAGGTGCAGCCAAGGCCGAGAGGCGGGGTTAGCCGCAGTCAATTCCACAACCCTGCTTTTCAG…
Equine_papillomavirus_2_complete_genome_EU503122.1	7802	4349	7802	NODE_63_length_7931_cov_5.291698	1	3454	3454	99.884	0	ATTGGCACTGGAAGAGGTGGGACGGGAGGAAGGCTTGGGTACCAGCCTGTGGGGCGCGGGGTTGCTCAGGGGGGCGGCAGTGTCCGCGTGGGCACCCCCGTGTCTGTGCTGGAGCCCGGTGTAGGAGTGGAGACGGTGGGACCAAAGGACCTGGTGCCAGTGGACGCCTTGGGGCCCACCACTCCCTCTGTGGTGCCCCTGGGTGAGGGGGATGCCCTGGCGCCAGGCGTGGAAATCTCTGCGGAGGTGCACCCCACGTTTGACCCCACAGCGGCTGGTGGTGCAGGAGGGGTGTCCTCCTCCGGGGGCGAGGCTGCGGTGCTCGAGGTCCCCCCTCAGGTGCAGCCAAGGCCGAGAGGCGGGGTTAGCCGCAGTCAATTCCACAACCCTGCTTTTCAG…
Equine_papillomavirus_2_complete_genome_NC_012123.1	7802	4349	7802	NODE_63_length_7931_cov_5.291698	1	3454	3454	99.884	0	ATTGGCACTGGAAGAGGTGGGACGGGAGGAAGGCTTGGGTACCAGCCTGTGGGGCGCGGGGTTGCTCAGGGGGGCGGCAGTGTCCGCGTGGGCACCCCCGTGTCTGTGCTGGAGCCCGGTGTAGGAGTGGAGACGGTGGGACCAAAGGACCTGGTGCCAGTGGACGCCTTGGGGCCCACCACTCCCTCTGTGGTGCCCCTGGGTGAGGGGGATGCCCTGGCGCCAGGCGTGGAAATCTCTGCGGAGGTGCACCCCACGTTTGACCCCACAGCGGCTGGTGGTGCAGGAGGGGTGTCCTCCTCCGGGGGCGAGGCTGCGGTGCTCGAGGTCCCCCCTCAGGTGCAGCCAAGGCCGAGAGGCGGGGTTAGCCGCAGTCAATTCCACAACCCTGCTTTTCAG…
Equus_caballus_papillomavirus_9_strain_complete_genome_SW_MN117918.1	7656	1646	3203	NODE_63_length_7931_cov_5.291698	4718	6293	1598	65.707	2.08e-87	CCTCAAGTGAAGAGGCGGCTCTTCGAGCCCCC-GCAACCGGGAAGCGGGGGGCGTCCGGGTGTAAGCTATGAAGCTCACGGTTTTTACAGCAGGACGGACCTTCAGGTAGAGACACCGCTGGGCATACAGGGTGGACGGGTCC--CTCTGCGGAGCATAGAGAATGTGGTGGACAGTCACGCTGGCACGCAGCACTTGGACGTGCTGCGTGCCAGTAACAGGGAGGCGGCCATGTTAGGCCGCTTTAA-GA--CCTGTTTTGAAGTGGGATTTAATGAATTGACAAGGCCTTTTACTAGCAACAAGACCTGTGCCAAGCAGTGGGTGGTGCTTGCGTATTCTGTTCGGGAAGCCCTTTTTGAAGCAGCAAAAGAACTGCTGCGACAGCACTGTGACTAT…
Equus_caballus_papillomavirus_9_strain_complete_genome_SW_MN117918.1	7656	6087	7654	NODE_63_length_7931_cov_5.291698	1261	2822	1587	70.762	0	TTCGATCTGCACCCCTCCCTGCACCCCCGCAAACGCAAACGGCGGTACAATTGCTGTTTTGCAGATGGCTTTCTGGACAATGAACAGACAACACCTGTACCTCCCCCCCAATCCCGTCTCTAGGGTTTTGGGGACTGATGAGTATGTGAAGCGGCTGTCGGTGTTCTATCATGGTAACAGCGAGCGTATGCTCATGGTGGGCCACCCCTTCTTTGCCCTGAAAAATGACAGGGACAAGCTGGACGTTCCCAAGGTGTCCTCTAATCAGTACAGGGTGTTTGAGGTAGTTCTCCCAAATCCCAACAAATTTGCTCTTGCAGATCAGAACATTTACAACCCAGAGACCTCCAGACTTGTCTGGGCTCTCCGCGGTGTCGAGGTGTCACGGGGGCAGCCTCT…
Equus_ferus_caballus_papillomavirus_type_4_complete_genome_NC_020085.1	7554	5398	6639	NODE_63_length_7931_cov_5.291698	1294	2553	1276	65.987	6.29e-75	CGCAAACGGCGGTACAATTGCTGTTTTGCAGATGGCTTTCTGGACAATGAACAGACAACACCTGTACCTCCCCCCCAATCCCGTCTCTAGGGTTTTGGGGACTGATGAGTATGTGAAGCGGCTGTCGGTGTTCTATCATGGTAACAGCGAGCGTATGCTCATGGTGGGCCACCCCTTCTTTGCCCTGAAAAATGACAGGGACAAGCTGGACGTTCCCAAGGTGTCCTCTAATCAGTACAGGGTGTTTGAGGTAGTTCTCCCAAATCCCAACAAATTTGCTCTTGCAGATCAGAACATTTACAACCCAGAGACCTCCAGACTTGTCTGGGCTCTCCGCGGTGTCGAGGTGTCACGGGGGCAGCCTCTGGGCATCGGGGTGACAGGAAGCACAGTGTTTAA…
Equus_ferus_caballus_papillomavirus_type_4_complete_genome_JQ031032.1	7554	5398	6639	NODE_63_length_7931_cov_5.291698	1294	2553	1276	65.987	6.29e-75	CGCAAACGGCGGTACAATTGCTGTTTTGCAGATGGCTTTCTGGACAATGAACAGACAACACCTGTACCTCCCCCCCAATCCCGTCTCTAGGGTTTTGGGGACTGATGAGTATGTGAAGCGGCTGTCGGTGTTCTATCATGGTAACAGCGAGCGTATGCTCATGGTGGGCCACCCCTTCTTTGCCCTGAAAAATGACAGGGACAAGCTGGACGTTCCCAAGGTGTCCTCTAATCAGTACAGGGTGTTTGAGGTAGTTCTCCCAAATCCCAACAAATTTGCTCTTGCAGATCAGAACATTTACAACCCAGAGACCTCCAGACTTGTCTGGGCTCTCCGCGGTGTCGAGGTGTCACGGGGGCAGCCTCTGGGCATCGGGGTGACAGGAAGCACAGTGTTTAA…
Equus_ferus_caballus_papillomavirus_type_5_complete_genome_JQ031033.1	7519	5398	6634	NODE_63_length_7931_cov_5.291698	1311	2568	1272	65.566	8.7e-67	TTGCTGTTTTGCAGATGGCTTTCTGGACAATGAACAGACAACACCTGTACCTCCCCCCCAATCCCGTCTCTAGGGTTTTGGGGACTGATGAGTATGTGAAGCGGCTGTCGGTGTTCTATCATGGTAACAGCGAGCGTATGCTCATGGTGGGCCACCCCTTCTTTGCCCTGAAAAATGACAGGGACAAGCTGGACGTTCCCAAGGTGTCCTCTAATCAGTACAGGGTGTTTGAGGTAGTTCTCCCAAATCCCAACAAATTTGCTCTTGCAGATCAGAACATTTACAACCCAGAGACCTCCAGACTTGTCTGGGCTCTCCGCGGTGTCGAGGTGTCACGGGGGCAGCCTCTGGGCATCGGGGTGACAGGAAG-CACAGTGTTTAACAAGCTGTATGATGTA…
Equus_ferus_caballus_papillomavirus_type_5_complete_genome_NC_020084.1	7519	5398	6634	NODE_63_length_7931_cov_5.291698	1311	2568	1272	65.566	8.7e-67	TTGCTGTTTTGCAGATGGCTTTCTGGACAATGAACAGACAACACCTGTACCTCCCCCCCAATCCCGTCTCTAGGGTTTTGGGGACTGATGAGTATGTGAAGCGGCTGTCGGTGTTCTATCATGGTAACAGCGAGCGTATGCTCATGGTGGGCCACCCCTTCTTTGCCCTGAAAAATGACAGGGACAAGCTGGACGTTCCCAAGGTGTCCTCTAATCAGTACAGGGTGTTTGAGGTAGTTCTCCCAAATCCCAACAAATTTGCTCTTGCAGATCAGAACATTTACAACCCAGAGACCTCCAGACTTGTCTGGGCTCTCCGCGGTGTCGAGGTGTCACGGGGGCAGCCTCTGGGCATCGGGGTGACAGGAAG-CACAGTGTTTAACAAGCTGTATGATGTA…
Equus_caballus_papillomavirus_1_strain_150904_complete_genome_MF288893.1	7613	1629	2555	NODE_63_length_7931_cov_5.291698	5369	6298	945	66.561	3.29e-53	CACCAGTGTGAGGAGGCGATGAAATTTGAGTTTTCAGACATGGTGCAGTGGGCCTATGACAACCACG-TCACAGAGGAAAGTCAGATAGCATATGGGTACGCTAGCCTAGCGGACACTAATGCCAATGCTGCAGCATTTCT-GGCCTGCGCGTCTCAAGCTAAGTATGTGCGAGATGTGGCCACGATGGTCAAATATTACCGCAGAGCGGAGATGCAGAACATGTCAATATCTGAATGGATTCACAGGCAGGCAGAGAAAATAGAGGGGGAGGGCGATTGGCGGCCCATCATAAACTTTCTGAAGCACCAGGGCGTTGAAATCTCTGTGTTCATTAACAACCTGAAGCACTTTGTTAAGGGGGTCCCCAAA-AAAAATTGCATGGTGCTCGTGGGGCCA…
Equus_caballus_papillomavirus_type_1_complete_genome_AF498323.1	7610	1629	2555	NODE_63_length_7931_cov_5.291698	5369	6298	945	66.455	4e-52	CACCAGTGTGAGGAGGCGATGAAATTTGAGTTTTCAGACATGGTGCAGTGGGCCTATGACAACCACG-TCACAGAGGAAAGTCAGATAGCATATGGGTACGCTAGCCTAGCGGACACTAATGCCAATGCTGCAGCATTTCT-GGCCTGCGCGTCTCAAGCTAAGTATGTGCGAGATGTGGCCACGATGGTCAAATATTACCGCAGAGCGGAGATGCAGAACATGTCAATATCTGAATGGATTCACAGGCAGGCAGAGAAAATAGAGGGGGAGGGCGATTGGCGGCCCATCATAAACTTTCTGAAGCACCAGGGCGTTGAAATCTCTGTGTTCATTAACAACCTGAAGCACTTTGTTAAGGGGGTCCCCAAA-AAAAATTGCATGGTGCTCGTGGGGCCA…
Equus_caballus_papillomavirus_type_1_complete_genome_NC_003748.1	7610	1629	2555	NODE_63_length_7931_cov_5.291698	5369	6298	945	66.455	4e-52	CACCAGTGTGAGGAGGCGATGAAATTTGAGTTTTCAGACATGGTGCAGTGGGCCTATGACAACCACG-TCACAGAGGAAAGTCAGATAGCATATGGGTACGCTAGCCTAGCGGACACTAATGCCAATGCTGCAGCATTTCT-GGCCTGCGCGTCTCAAGCTAAGTATGTGCGAGATGTGGCCACGATGGTCAAATATTACCGCAGAGCGGAGATGCAGAACATGTCAATATCTGAATGGATTCACAGGCAGGCAGAGAAAATAGAGGGGGAGGGCGATTGGCGGCCCATCATAAACTTTCTGAAGCACCAGGGCGTTGAAATCTCTGTGTTCATTAACAACCTGAAGCACTTTGTTAAGGGGGTCCCCAAA-AAAAATTGCATGGTGCTCGTGGGGCCA…
Equus_caballus_papillomavirus_1_isolate_G2_complete_genome_MN164462.1	7611	1629	2555	NODE_63_length_7931_cov_5.291698	5369	6298	944	66.525	9.41e-54	CACCAGTGTGAGGAGGCGATGAAATTTGAGTTTTCAGACATGGTGCAGTGGGCCTATGACAACCACG-TCACAGAGGAAAGTCAGATAGCATATGGGTACGCTAGCCTAGCGGACACTAATGCCAATGCTGCAGCATTTCT-GGCCTGCGCGTCTCAAGCTAAGTATGTGCGAGATGTGGCCACGATGGTCAAATATTACCGCAGAGCGGAGATGCAGAACATGTCAATATCTGAATGGATTCACAGGCAGGCAGAGAAAATAGAGGGGGAGGGCGATTGGCGGCCCATCATAAACTTTCTGAAGCACCAGGGCGTTGAAATCTCTGTGTTCATTAACAACCTGAAGCACTTTGTTAAGGGGGTCCCCAAA-AAAAATTGCATGGTGCTCGTGGGGCCA…
Equus_ferus_caballus_papillomavirus_type_5_complete_genome_JQ031033.1	7519	1652	2576	NODE_63_length_7931_cov_5.291698	5377	6298	939	64.856	3.47e-40	TGAGGAGGCGATGAAATTTGAGTTTTCAGACATGGTGCAGTGGGCCTATGACAACCACGTCACAGAGGAAAGTCAGATAGCATATGGGTACGCTAGCCTAGCGGACACTAATGCCAATGCTGCAGCATTTCTGGCCTGCGCGTCTCAAGCTAAGTATGTGCGAGATGTGGCCACGATGGTCAAATATTACCGCAGAGCGGAGATGCAGAACATGTCAATATCTGAATGGATTCACAGGCAGG-CAGAGAAAATAGAGGGGGAGGGCGATTGGCGGCCCATCATAAACTTTCTGAAGCACCAGGGCGTTGAAATCTCTGTGTTCATTAACAACCTGAAGCACTTTGTTAAGGGGGTCCCCAAAAAAAATTGCATGGTGCTCGTGGGGCCACCAAACACTG…
Equus_ferus_caballus_papillomavirus_type_5_complete_genome_NC_020084.1	7519	1652	2576	NODE_63_length_7931_cov_5.291698	5377	6298	939	64.856	3.47e-40	TGAGGAGGCGATGAAATTTGAGTTTTCAGACATGGTGCAGTGGGCCTATGACAACCACGTCACAGAGGAAAGTCAGATAGCATATGGGTACGCTAGCCTAGCGGACACTAATGCCAATGCTGCAGCATTTCTGGCCTGCGCGTCTCAAGCTAAGTATGTGCGAGATGTGGCCACGATGGTCAAATATTACCGCAGAGCGGAGATGCAGAACATGTCAATATCTGAATGGATTCACAGGCAGG-CAGAGAAAATAGAGGGGGAGGGCGATTGGCGGCCCATCATAAACTTTCTGAAGCACCAGGGCGTTGAAATCTCTGTGTTCATTAACAACCTGAAGCACTTTGTTAAGGGGGTCCCCAAAAAAAATTGCATGGTGCTCGTGGGGCCACCAAACACTG…
Equus_ferus_caballus_papillomavirus_type_4_complete_genome_NC_020085.1	7554	1659	2540	NODE_63_length_7931_cov_5.291698	5411	6292	895	64.693	1.14e-33	GTGCAGTGGGCCTATGACAACCACGTCACAGAGGAAAGTCAGATAGCATATGGGTACGCTAGCCTAGCGGACACTAATGCCAATGCTGCAGCATTTCTGGCCTGCGCGTCTCAAGCTAAGTATGTGCGAGATGTGGCCACGATGGTCAAATATTACCGCAGAGCGGAGATGCAGAACATGTCAATATCTGAATGGATTCACAGGCAGGCAGAGAAAATAGAGGGGGAGGGCGATTGGCGGCCCATCATAAACTTTCTGAAGCACCAGGGCGTTGAAATC-TCTGTGTTCATTAACAACCTGAAGCACTTTGTTAAGGGGGTCCCCAAAAAAAATTGCATGGTGCTCGTGGGGCCACCAAACACTGGCAAGTC-CAGCTTTGCTGTGAGCTTGCTGGAGT…
Equus_ferus_caballus_papillomavirus_type_4_complete_genome_JQ031032.1	7554	1659	2540	NODE_63_length_7931_cov_5.291698	5411	6292	895	64.693	1.14e-33	GTGCAGTGGGCCTATGACAACCACGTCACAGAGGAAAGTCAGATAGCATATGGGTACGCTAGCCTAGCGGACACTAATGCCAATGCTGCAGCATTTCTGGCCTGCGCGTCTCAAGCTAAGTATGTGCGAGATGTGGCCACGATGGTCAAATATTACCGCAGAGCGGAGATGCAGAACATGTCAATATCTGAATGGATTCACAGGCAGGCAGAGAAAATAGAGGGGGAGGGCGATTGGCGGCCCATCATAAACTTTCTGAAGCACCAGGGCGTTGAAATC-TCTGTGTTCATTAACAACCTGAAGCACTTTGTTAAGGGGGTCCCCAAAAAAAATTGCATGGTGCTCGTGGGGCCACCAAACACTGGCAAGTC-CAGCTTTGCTGTGAGCTTGCTGGAGT…
Equus_caballus_papillomavirus_1_strain_150904_complete_genome_MF288893.1	7613	5318	5991	NODE_63_length_7931_cov_5.291698	1426	2087	689	64.006	1.82e-18	CTATCATGGTAACAGCGAGCGTATGCTCATGGTGGGCCACCCCTTCTTTGCCCTGAAAAATGACAGGGAC--AAGC-TGGACGTTCCCAAGGTGTCCTCTAATCAGTACAGGGTGTTTGAG-GTAGTTCTCCCAAATCCCAACAAATTTGCTCTTGCAGATCAGAACATTTACAACCCAGAGACCTCCAGACTTGTCTGGGCTCTCCGCGGTGTCGAGGTGTCACGGGGGCAGCCTCT-GGGCATCGGGGTGACAGGAAGCACAGTGTTTAACAAGCTGTATGATGTAGAAAACCCAG----GGAAACGACAGGAAGCTGCAGGGGAGCGCGAGGATAAGCGTGTTAATATGGGCTTCGATGTGAAGCAGTCTCAGCTTTTGATGGTGGGCTGCAAGCC…
Equus_caballus_papillomavirus_type_1_complete_genome_AF498323.1	7610	5315	5988	NODE_63_length_7931_cov_5.291698	1426	2087	689	63.861	2.22e-17	CTATCATGGTAACAGCGAGCGTATGCTCATGGTGGGCCACCCCTTCTTTGCCCTGAAAAATGACAGGGAC--AAGC-TGGACGTTCCCAAGGTGTCCTCTAATCAGTACAGGGTGTTTGAG-GTAGTTCTCCCAAATCCCAACAAATTTGCTCTTGCAGATCAGAACATTTACAACCCAGAGACCTCCAGACTTGTCTGGGCTCTCCGCGGTGTCGAGGTGTCACGGGGGCAGCCTCT-GGGCATCGGGGTGACAGGAAGCACAGTGTTTAACAAGCTGTATGATGTAGAAAACCCAG----GGAAACGACAGGAAGCTGCAGGGGAGCGCGAGGATAAGCGTGTTAATATGGGCTTCGATGTGAAGCAGTCTCAGCTTTTGATGGTGGGCTGCAAGCC…
Equus_caballus_papillomavirus_type_1_complete_genome_NC_003748.1	7610	5315	5988	NODE_63_length_7931_cov_5.291698	1426	2087	689	63.861	2.22e-17	CTATCATGGTAACAGCGAGCGTATGCTCATGGTGGGCCACCCCTTCTTTGCCCTGAAAAATGACAGGGAC--AAGC-TGGACGTTCCCAAGGTGTCCTCTAATCAGTACAGGGTGTTTGAG-GTAGTTCTCCCAAATCCCAACAAATTTGCTCTTGCAGATCAGAACATTTACAACCCAGAGACCTCCAGACTTGTCTGGGCTCTCCGCGGTGTCGAGGTGTCACGGGGGCAGCCTCT-GGGCATCGGGGTGACAGGAAGCACAGTGTTTAACAAGCTGTATGATGTAGAAAACCCAG----GGAAACGACAGGAAGCTGCAGGGGAGCGCGAGGATAAGCGTGTTAATATGGGCTTCGATGTGAAGCAGTCTCAGCTTTTGATGGTGGGCTGCAAGCC…
Equus_caballus_papillomavirus_9_strain_complete_genome_SW_MN117918.1	7656	4810	5433	NODE_63_length_7931_cov_5.291698	5	628	635	65.984	5.24e-38	GCACTGGAAGAGGTGGGACGGGAGGAAGGCTTGGGTACCAGCCTGTGGGGCGCGGGGTTGC---TCAGGGGGGCGGCAGTGTCCGCGTGGGCACCCCCGTGTCTGTGCTGGAGCCCGGTGTAGGAGTGGAGACGGTGGGACCAAAGGACCTGGTGCCAGTGGACGCCTTGGGGCCCACCACTCCCTCTGTGGTGCCCCTGGGTGAGGGGGATGCCCTGGCG------CCAGGCGTGGAAATCTCTGCGGAGGTGCACCCCACGTTTGACCCCACAGCGGCTGGTGGTGCAGGAGGGGTGTCCTCCTCCGGGGGCGAGGCTGCGGTGCTCGAGGTCCCCCCTCAGGTGCAGCCAAGGCCGAGAGGCGGGGTTAGCCGCAGTCAATTCCACAACCCTGCTT…
Equus_caballus_papillomavirus_8_strain_NCSU_complete_genome_KU963288.1	8155	1740	2359	NODE_63_length_7931_cov_5.291698	5405	6024	629	63.911	3.3e-09	GACATGGTGCAGTGGGCCTATGACAACCACGTCACAGAGGAAAGTCAG-ATAGCATATGGGTACGCTAGCCTAGCGGACACTAATGCCAATGCTGCAGCATTTCTGGCCTGCGCGTCTCAAGCTAAGTATGTGCGAGA-TGTGGCCACGATGGTCAAATATTACCGCAGAGCGGAGATGCAGAACATGTCAATATCTGAATGGATTCACAGGCAGGCAGAGAAAATAGAGGGGGAGGGCGATTGGCGGCCCATCATAAACTTTCTGAAGCACCAGGGCGTTGAA---ATCTCTGTGTTCATTAACAACCTGAAGCACTTTGTTAAGGGGGTCCCCAAAAAAAATTGCATGGTGCTCGTGGGGCCACCAAACACTGGCAAGTCCAGCTT-TGCTGTGAGC…
Equus_caballus_papillomavirus_8_strain_NCSU_complete_genome_NC_031756.1	8155	1740	2359	NODE_63_length_7931_cov_5.291698	5405	6024	629	63.911	3.3e-09	GACATGGTGCAGTGGGCCTATGACAACCACGTCACAGAGGAAAGTCAG-ATAGCATATGGGTACGCTAGCCTAGCGGACACTAATGCCAATGCTGCAGCATTTCTGGCCTGCGCGTCTCAAGCTAAGTATGTGCGAGA-TGTGGCCACGATGGTCAAATATTACCGCAGAGCGGAGATGCAGAACATGTCAATATCTGAATGGATTCACAGGCAGGCAGAGAAAATAGAGGGGGAGGGCGATTGGCGGCCCATCATAAACTTTCTGAAGCACCAGGGCGTTGAA---ATCTCTGTGTTCATTAACAACCTGAAGCACTTTGTTAAGGGGGTCCCCAAAAAAAATTGCATGGTGCTCGTGGGGCCACCAAACACTGGCAAGTCCAGCTT-TGCTGTGAGC…
Equine_papillomavirus_type_6_complete_genome_JQ965698.1	7551	5512	5849	NODE_63_length_7931_cov_5.291698	1502	1842	342	63.743	0.003	GACGTTCCCAAGGTGTCCTCTAATCAGTACAGGGTGTTTGAGGTAGTTCTCCCAAATCCCAACAAATTTGCTCTTGCAGATCAGAACATTTACAACCCAGAGACCTCCAGACTTGTCTGGGCTCTCCGCGGTGTCGAGGTGTCACGGGGGCAGCCTCTGGGCATCGGGGTGACAGGAAGCACAGTGTTTAACAAGCTGTATGATGTAGAAAACCCAGGGAAACGACAGGAAGCTGCAGGGGAGCGCGAGGATAAGCGTGTTAATATGG-GCTTCGATGTGAAGCAGTCTCAGCTTTTGATGGTGGGCTGCAAGCCGGCCATCGGCGAGCACTGGACCAAGGC
Equine_papillomavirus_type_6_complete_genome_NC_020500.1	7551	5512	5849	NODE_63_length_7931_cov_5.291698	1502	1842	342	63.743	0.003	GACGTTCCCAAGGTGTCCTCTAATCAGTACAGGGTGTTTGAGGTAGTTCTCCCAAATCCCAACAAATTTGCTCTTGCAGATCAGAACATTTACAACCCAGAGACCTCCAGACTTGTCTGGGCTCTCCGCGGTGTCGAGGTGTCACGGGGGCAGCCTCTGGGCATCGGGGTGACAGGAAGCACAGTGTTTAACAAGCTGTATGATGTAGAAAACCCAGGGAAACGACAGGAAGCTGCAGGGGAGCGCGAGGATAAGCGTGTTAATATGG-GCTTCGATGTGAAGCAGTCTCAGCTTTTGATGGTGGGCTGCAAGCCGGCCATCGGCGAGCACTGGACCAAGGC
Equine_papillomavirus_type_6_complete_genome_JQ965698.1	7551	2256	2565	NODE_63_length_7931_cov_5.291698	5951	6254	316	65.823	5.9e-12	GATGGCAACCCCATTTCTGTGGACCAGAAGCATAAGCAGCCTCTGCAGCTGAGATGCCCCCCTCTGTTGATGACCACAAACG---TGGA-CATC--AGCCAGGAGTCCAAGTATTGGTACCTGCACAGTCGCATGATTGTGCTTAGATTCCCCAACCCCTTCCCTCTTGATGAAAACCAGCAGCCCGTATTTGAATTAACTGTGAAAAATTGGAAATCTCTTTTTAAAAGGTTGTGGCAACGCTTAGAATTGAGTGACCAGGAGGACGAGGG------AGACGATGGAGAACCTACACAGGGCTTTAGATGCACTG
Equine_papillomavirus_type_6_complete_genome_NC_020500.1	7551	2256	2565	NODE_63_length_7931_cov_5.291698	5951	6254	316	65.823	5.9e-12	GATGGCAACCCCATTTCTGTGGACCAGAAGCATAAGCAGCCTCTGCAGCTGAGATGCCCCCCTCTGTTGATGACCACAAACG---TGGA-CATC--AGCCAGGAGTCCAAGTATTGGTACCTGCACAGTCGCATGATTGTGCTTAGATTCCCCAACCCCTTCCCTCTTGATGAAAACCAGCAGCCCGTATTTGAATTAACTGTGAAAAATTGGAAATCTCTTTTTAAAAGGTTGTGGCAACGCTTAGAATTGAGTGACCAGGAGGACGAGGG------AGACGATGGAGAACCTACACAGGGCTTTAGATGCACTG
Equus_caballus_papillomavirus_1_isolate_G2_complete_genome_MN164462.1	7611	5315	5608	NODE_63_length_7931_cov_5.291698	1426	1716	296	66.216	1.08e-08	CTATCATGGTAACAGCGAGCGTATGCTCATGGTGGGCCACCCCTTCTTTGCCCTGAAAAATGACAGGGA-CAAGC--TGGACGTTCCCAAGGTGTCCTCTAATCAGTACAGGGTGTTTGAG-GTAGTTCTCCCAAATCCCAACAAATTTGCTCTTGCAGATCAGAACATTTACAACCCAGAGACCTCCAGACTTGTCTGGGCTCTCCGCGGTGTCGAGGTGTCACGGGGGCAGCCTCT-GGGCATCGGGGTGACAGGAAGCACAGTGTTTAACAAGCTGTATGATGTAGAAAACCC
Equus_caballus_papillomavirus_9_strain_complete_genome_SW_MN117918.1	7656	4639	4927	NODE_63_length_7931_cov_5.291698	7637	7922	289	72.318	5.24e-38	CGCTGCCTGCCAAGCGGCGGCGCAGGGCTGCAGGGCAGGACCTGTACCGGGCCTGCAAGATGGGGGCGGACTGCATCCCTGATGTGAGGGCCAAATATGAGCAGGACACTGTGGCTGACCGCATTCTAAAATGGCTCAGCTCCTTCCTTTACCTTGGGAACCTGGGTATTGGCACTGGAAGAGGTGGGACGGGAGGAAGGCTTGGGTACCAGCCTGTGGGGCGCGGGGTTGC---TCAGGGGGGCGGCAGTGTCCGCGTGGGCACCCCCGTGTCTGTGCTGGAGCCCGG
Equus_caballus_papillomavirus_9_strain_complete_genome_SW_MN117918.1	7656	3250	3513	NODE_13465_length_264_cov_0.989305	264	1	264	100	1.49e-133	ACTGCCTGTACCATGCATGTAGGCAGAAAGGCCTACAAAGAGTGGGCCCACTTCCTATACCCAGCCTTGCTGCCTCAGCCGCTCGTGCCAGGGTGGCCATAGGCATGGAACTGCGCCTGACAAGCCTGGCACAGTCCGCCTTTGCAGAGGAGCCCTGGACAATGACTGACACCAGTCATGAAACCTTTTGTGCAGCACCAACAGAGACCTTTAAAAAAGAGGGCAGTGTGGTAACTGTGACATTTGATGGTGAAAGGGGGAATG
Equus_ferus_caballus_papillomavirus_type_4_complete_genome_NC_020085.1	7554	4003	4239	NODE_63_length_7931_cov_5.291698	7660	7902	247	65.182	5.53e-06	AGGGCTGCAGGGCAGGACCTGTACCGGGCCTGCAAGATGGGGGCGGACTGCATCCCTGATGTGAGGGCCAAATATGAGCAGGACACTGTGGCTGACCGCATTCTAAAATGGCTCAGCTCCTTCCTTTACCTTGGGAACCTGGGTATTGGC---ACTGGAAGAGGTGGGACGGGAGGAAGGCTTGGGTACCAGCCTGTGGGGCGCGGG-GTTGCTCAGGGGGGCGGCAGTGTCCGCGTGGGCACCCCC
Equus_ferus_caballus_papillomavirus_type_4_complete_genome_JQ031032.1	7554	4003	4239	NODE_63_length_7931_cov_5.291698	7660	7902	247	65.182	5.53e-06	AGGGCTGCAGGGCAGGACCTGTACCGGGCCTGCAAGATGGGGGCGGACTGCATCCCTGATGTGAGGGCCAAATATGAGCAGGACACTGTGGCTGACCGCATTCTAAAATGGCTCAGCTCCTTCCTTTACCTTGGGAACCTGGGTATTGGC---ACTGGAAGAGGTGGGACGGGAGGAAGGCTTGGGTACCAGCCTGTGGGGCGCGGG-GTTGCTCAGGGGGGCGGCAGTGTCCGCGTGGGCACCCCC
Equus_caballus_papillomavirus_9_strain_complete_genome_SW_MN117918.1	7656	2717	2952	NODE_12937_length_267_cov_1.468421	239	4	236	73.305	1.41e-32	TTTCTGAAAGGAAGGGTGCTGTCCTTTGCAAACAGCCAAAGCCACTTTTGGCTTATGCCCCTGGCAGATACCAGGGTTGCCCTGCTGGACGATGCCACATGGCCCGTCTGGGACTATTTTGACACGTACATGCGCAACGCCTTGGACGGATACCCCATCAGTGTGGACCTTAAGCACAGGGCGCCAGCGCAGATCAAGTGTCCCCCCCTTATTGTGACCTCTAATTTAGATGTGCG
Equus_ferus_caballus_papillomavirus_type_7_complete_genome_JX035935.1	7619	2105	2334	NODE_12937_length_267_cov_1.468421	244	15	234	68.376	7.25e-11	TGGAGTTTCTGAAAGGAAGGGTGCTGTCCTTTGCAAACAGCCAAAGCCACTTTTGGCTTATGC-CCCTG-GCA-GATACCAGGGTTGCCCTGCTGGACGATGCCA-CATGGCCCGTCTGGGACTATTTTGACACGTACATGCGCAACGCCTTGGACGGATACCCCATCAGTGTGGACCTTAAGCACAGGGCGCCAGCGCAGATCAAGTGTCCCCCCCTTATTGTGACCTCTAAT
Equus_ferus_caballus_papillomavirus_type_7_complete_genome_NC_020501.1	7619	2105	2334	NODE_12937_length_267_cov_1.468421	244	15	234	68.376	7.25e-11	TGGAGTTTCTGAAAGGAAGGGTGCTGTCCTTTGCAAACAGCCAAAGCCACTTTTGGCTTATGC-CCCTG-GCA-GATACCAGGGTTGCCCTGCTGGACGATGCCA-CATGGCCCGTCTGGGACTATTTTGACACGTACATGCGCAACGCCTTGGACGGATACCCCATCAGTGTGGACCTTAAGCACAGGGCGCCAGCGCAGATCAAGTGTCCCCCCCTTATTGTGACCTCTAAT
Equus_caballus_papillomavirus_8_strain_NCSU_complete_genome_KU963288.1	8155	2145	2374	NODE_12937_length_267_cov_1.468421	236	7	231	68.831	1.01e-15	CTGAAAGGAAGGGTGCTGTCCTTTGCAAACAGCCAAAGCCACTTTTGGCTTATGCCCCTGGCAGATACCAGGGTTGCCCTGCTGGACGATGCCACATGGCCCGTCTGGGACTATTTTGACACGTACATGCGCAACGCCTTGGACGGATACCCCATCAGTGTGGACCTTAAGCACAGGGCGCCAGCGCAGATCAAGTGTCCCCCCCTTATT-GTGACCTCTAATTTAGATGT
Equus_caballus_papillomavirus_8_strain_NCSU_complete_genome_NC_031756.1	8155	2145	2374	NODE_12937_length_267_cov_1.468421	236	7	231	68.831	1.01e-15	CTGAAAGGAAGGGTGCTGTCCTTTGCAAACAGCCAAAGCCACTTTTGGCTTATGCCCCTGGCAGATACCAGGGTTGCCCTGCTGGACGATGCCACATGGCCCGTCTGGGACTATTTTGACACGTACATGCGCAACGCCTTGGACGGATACCCCATCAGTGTGGACCTTAAGCACAGGGCGCCAGCGCAGATCAAGTGTCCCCCCCTTATT-GTGACCTCTAATTTAGATGT
Equus_caballus_papillomavirus_2_isolate_XJ-ks1391_complete_genome_MW410986.1	7802	2344	2560	NODE_12937_length_267_cov_1.468421	247	31	217	75.115	9.65e-35	TGGTGGAGTTTCTGAAAGGAAGGGTGCTGTCCTTTGCAAACAGCCAAAGCCACTTTTGGCTTATGCCCCTGGCAGATACCAGGGTTGCCCTGCTGGACGATGCCACATGGCCCGTCTGGGACTATTTTGACACGTACATGCGCAACGCCTTGGACGGATACCCCATCAGTGTGGACCTTAAGCACAGGGCGCCAGCGCAGATCAAGTGTCCCCCCCT
Equine_papillomavirus_2_isolate_Zurich_2009_HM461973.1_complete_genome	7803	2345	2561	NODE_12937_length_267_cov_1.468421	247	31	217	75.115	9.66e-35	TGGTGGAGTTTCTGAAAGGAAGGGTGCTGTCCTTTGCAAACAGCCAAAGCCACTTTTGGCTTATGCCCCTGGCAGATACCAGGGTTGCCCTGCTGGACGATGCCACATGGCCCGTCTGGGACTATTTTGACACGTACATGCGCAACGCCTTGGACGGATACCCCATCAGTGTGGACCTTAAGCACAGGGCGCCAGCGCAGATCAAGTGTCCCCCCCT
Equine_papillomavirus_2_complete_genome_EU503122.1	7802	2344	2560	NODE_12937_length_267_cov_1.468421	247	31	217	75.115	9.65e-35	TGGTGGAGTTTCTGAAAGGAAGGGTGCTGTCCTTTGCAAACAGCCAAAGCCACTTTTGGCTTATGCCCCTGGCAGATACCAGGGTTGCCCTGCTGGACGATGCCACATGGCCCGTCTGGGACTATTTTGACACGTACATGCGCAACGCCTTGGACGGATACCCCATCAGTGTGGACCTTAAGCACAGGGCGCCAGCGCAGATCAAGTGTCCCCCCCT
Equine_papillomavirus_2_complete_genome_NC_012123.1	7802	2344	2560	NODE_12937_length_267_cov_1.468421	247	31	217	75.115	9.65e-35	TGGTGGAGTTTCTGAAAGGAAGGGTGCTGTCCTTTGCAAACAGCCAAAGCCACTTTTGGCTTATGCCCCTGGCAGATACCAGGGTTGCCCTGCTGGACGATGCCACATGGCCCGTCTGGGACTATTTTGACACGTACATGCGCAACGCCTTGGACGGATACCCCATCAGTGTGGACCTTAAGCACAGGGCGCCAGCGCAGATCAAGTGTCCCCCCCT
Equus_caballus_papillomavirus_9_strain_complete_genome_SW_MN117918.1	7656	1333	1525	NODE_63_length_7931_cov_5.291698	4405	4597	199	69.347	2.54e-10	GGACAATGACCCAGGTACTAGCCCAAGGGAGGGGACTAGTGGCGCAGCCTGTTTTCTGGATAGGGAGGCGCTGTGTAGCGACTGTGATAGTG---ATGACTTAGAG-GATTCCTCAGAAGGGATCGATGGGGCA--GACTTTGTCGACAATGCATTTGTCGGCCAGGGAAATTCCCTAGCACTGTTCCAGCAGCAGCAG
Equus_caballus_papillomavirus_1_strain_150904_complete_genome_MF288893.1	7613	2103	2296	NODE_12937_length_267_cov_1.468421	200	7	194	71.134	1.49e-19	AGCCACTTTTGGCTTATGCCCCTGGCAGATACCAGGGTTGCCCTGCTGGACGATGCCACATGGCCCGTCTGGGACTATTTTGACACGTACATGCGCAACGCCTTGGACGGATACCCCATCAGTGTGGACCTTAAGCACAGGGCGCCAGCGCAGATCAAGTGTCCCCCCCTTATTGTGACCTCTAATTTAGATGT
Equus_caballus_papillomavirus_1_isolate_G2_complete_genome_MN164462.1	7611	2103	2296	NODE_12937_length_267_cov_1.468421	200	7	194	71.134	1.49e-19	AGCCACTTTTGGCTTATGCCCCTGGCAGATACCAGGGTTGCCCTGCTGGACGATGCCACATGGCCCGTCTGGGACTATTTTGACACGTACATGCGCAACGCCTTGGACGGATACCCCATCAGTGTGGACCTTAAGCACAGGGCGCCAGCGCAGATCAAGTGTCCCCCCCTTATTGTGACCTCTAATTTAGATGT
Equus_caballus_papillomavirus_type_1_complete_genome_AF498323.1	7610	2103	2296	NODE_12937_length_267_cov_1.468421	200	7	194	71.134	1.49e-19	AGCCACTTTTGGCTTATGCCCCTGGCAGATACCAGGGTTGCCCTGCTGGACGATGCCACATGGCCCGTCTGGGACTATTTTGACACGTACATGCGCAACGCCTTGGACGGATACCCCATCAGTGTGGACCTTAAGCACAGGGCGCCAGCGCAGATCAAGTGTCCCCCCCTTATTGTGACCTCTAATTTAGATGT
Equus_caballus_papillomavirus_type_1_complete_genome_NC_003748.1	7610	2103	2296	NODE_12937_length_267_cov_1.468421	200	7	194	71.134	1.49e-19	AGCCACTTTTGGCTTATGCCCCTGGCAGATACCAGGGTTGCCCTGCTGGACGATGCCACATGGCCCGTCTGGGACTATTTTGACACGTACATGCGCAACGCCTTGGACGGATACCCCATCAGTGTGGACCTTAAGCACAGGGCGCCAGCGCAGATCAAGTGTCCCCCCCTTATTGTGACCTCTAATTTAGATGT
Equus_caballus_papillomavirus_1_isolate_G2_complete_genome_MN164462.1	7611	5799	5988	NODE_63_length_7931_cov_5.291698	1898	2087	193	69.948	1.7e-12	CACACCCCCATTGAGGACGGGGACATGGGCGACATAGGTTTTGGTTGTCTTGACTTTAAGTACCTCTGCGAGA--ACAAGTCAGACATTCCACTGGACATTGTAGATGCCACCTGCAAGTACCCGGACTACATT-AAGATGGGGCAGGAGGCCTCTGGCAACTGCATGTTCTTCTATGCTAGGCGGGAGCAGA
Equus_ferus_caballus_papillomavirus_type_5_complete_genome_JQ031033.1	7519	2163	2311	NODE_12937_length_267_cov_1.468421	155	7	150	67.333	0.01	CTGGACGATGCCACATGGCCC-GTCTGGGACTATTTTGACACGTACATGCGCAACGCCTTGGACGGATACCCCATCAGTGTGGACCTTAAGCACAGGGCGCCAGCGCAGATCAAGTGTCCCCCCCTTATTGTGACCTCTAATTTAGATGT
Equus_ferus_caballus_papillomavirus_type_5_complete_genome_NC_020084.1	7519	2163	2311	NODE_12937_length_267_cov_1.468421	155	7	150	67.333	0.01	CTGGACGATGCCACATGGCCC-GTCTGGGACTATTTTGACACGTACATGCGCAACGCCTTGGACGGATACCCCATCAGTGTGGACCTTAAGCACAGGGCGCCAGCGCAGATCAAGTGTCCCCCCCTTATTGTGACCTCTAATTTAGATGT
Equine_papillomavirus_type_6_complete_genome_JQ965698.1	7551	6207	6347	NODE_63_length_7931_cov_5.291698	2203	2343	141	71.631	1.69e-12	CACGCCAAGTGGATCGCTGGTGTCCACCGACTCTCAAATCTTTAACAGGCCTTACTGGCTGCAGCGTGCACAGGGGCAAAACAATGGGGTCTGCTGGCATGACAAGGTGTATGTTACAGTTTTTGACAACACCCGGGGTAC
Equine_papillomavirus_type_6_complete_genome_NC_020500.1	7551	6207	6347	NODE_63_length_7931_cov_5.291698	2203	2343	141	71.631	1.69e-12	CACGCCAAGTGGATCGCTGGTGTCCACCGACTCTCAAATCTTTAACAGGCCTTACTGGCTGCAGCGTGCACAGGGGCAAAACAATGGGGTCTGCTGGCATGACAAGGTGTATGTTACAGTTTTTGACAACACCCGGGGTAC
Equine_papillomavirus_3_isolate_Haflinger_GU384895.1_complete_genome	7582	6214	6338	NODE_63_length_7931_cov_5.291698	2240	2364	125	77.6	4.26e-20	ATCTTTAACAGGCCTTACTGGCTGCAGCGTGCACAGGGGCAAAACAATGGGGTCTGCTGGCATGACAAGGTGTATGTTACAGTTTTTGACAACACCCGGGGTACCAATTTCAGCATCAGTGTCAA
Equine_papillomavirus_3_complete_genome_NC_017862.1	7582	6214	6338	NODE_63_length_7931_cov_5.291698	2240	2364	125	77.6	4.26e-20	ATCTTTAACAGGCCTTACTGGCTGCAGCGTGCACAGGGGCAAAACAATGGGGTCTGCTGGCATGACAAGGTGTATGTTACAGTTTTTGACAACACCCGGGGTACCAATTTCAGCATCAGTGTCAA
Equine_papillomavirus_3_isolate_Haflinger_GU384895.1_complete_genome	7582	6385	6507	NODE_63_length_7931_cov_5.291698	2423	2545	123	66.667	0.43	AGACATGTGGAGGAGTATGAATTGTCCTTCATCTTTGAGCTGTGCAGTGTCACGTTGTCTCCAGAGGTAATGGCGCACCTGCACACCATGGACCCAGACATTCTTGAGGAATGGGAAATAGGC
Equine_papillomavirus_3_complete_genome_NC_017862.1	7582	6385	6507	NODE_63_length_7931_cov_5.291698	2423	2545	123	66.667	0.43	AGACATGTGGAGGAGTATGAATTGTCCTTCATCTTTGAGCTGTGCAGTGTCACGTTGTCTCCAGAGGTAATGGCGCACCTGCACACCATGGACCCAGACATTCTTGAGGAATGGGAAATAGGC
Equus_ferus_caballus_papillomavirus_type_7_complete_genome_JX035935.1	7619	6000	6121	NODE_63_length_7931_cov_5.291698	1970	2091	122	69.672	5.58e-06	AACAAGTCAGACATTCCACTGGACATTGTAGATGCCACCTGCAAGTACCCGGACTACATTAAGATGGGGCAGGAGGCCTCTGGCAACTGCATGTTCTTCTATGCTAGGCGGGAGCAGATGTA
Equus_ferus_caballus_papillomavirus_type_7_complete_genome_JX035935.1	7619	6442	6562	NODE_63_length_7931_cov_5.291698	2424	2544	122	70.492	1.95e-05	GACATGTGGAGGAGTATGAATTGTCCTTCATCTTTGAGCTGTGCAGTGTCACGTTGTCTCCAGAGGTAATGGCGCACCTGCACACCATGGACCCAGACA-TTCTTGAGGAATGGGAAATAGG
Equus_ferus_caballus_papillomavirus_type_7_complete_genome_NC_020501.1	7619	6000	6121	NODE_63_length_7931_cov_5.291698	1970	2091	122	69.672	5.58e-06	AACAAGTCAGACATTCCACTGGACATTGTAGATGCCACCTGCAAGTACCCGGACTACATTAAGATGGGGCAGGAGGCCTCTGGCAACTGCATGTTCTTCTATGCTAGGCGGGAGCAGATGTA
Equus_ferus_caballus_papillomavirus_type_7_complete_genome_NC_020501.1	7619	6442	6562	NODE_63_length_7931_cov_5.291698	2424	2544	122	70.492	1.95e-05	GACATGTGGAGGAGTATGAATTGTCCTTCATCTTTGAGCTGTGCAGTGTCACGTTGTCTCCAGAGGTAATGGCGCACCTGCACACCATGGACCCAGACA-TTCTTGAGGAATGGGAAATAGG
Equus_caballus_papillomavirus_1_strain_150904_complete_genome_MF288893.1	7613	6144	6258	NODE_63_length_7931_cov_5.291698	2237	2351	115	68.696	0.000827	CAAATCTTTAACAGGCCTTACTGGCTGCAGCGTGCACAGGGGCAAAACAATGGGGTCTGCTGGCATGACAAGGTGTATGTTACAGTTTTTGACAACACCCGGGGTACCAATTTCA
Equus_caballus_papillomavirus_1_isolate_G2_complete_genome_MN164462.1	7611	6141	6255	NODE_63_length_7931_cov_5.291698	2237	2351	115	67.826	0.035	CAAATCTTTAACAGGCCTTACTGGCTGCAGCGTGCACAGGGGCAAAACAATGGGGTCTGCTGGCATGACAAGGTGTATGTTACAGTTTTTGACAACACCCGGGGTACCAATTTCA
Equus_caballus_papillomavirus_type_1_complete_genome_AF498323.1	7610	6141	6255	NODE_63_length_7931_cov_5.291698	2237	2351	115	68.696	0.000827	CAAATCTTTAACAGGCCTTACTGGCTGCAGCGTGCACAGGGGCAAAACAATGGGGTCTGCTGGCATGACAAGGTGTATGTTACAGTTTTTGACAACACCCGGGGTACCAATTTCA
Equus_caballus_papillomavirus_type_1_complete_genome_NC_003748.1	7610	6141	6255	NODE_63_length_7931_cov_5.291698	2237	2351	115	68.696	0.000827	CAAATCTTTAACAGGCCTTACTGGCTGCAGCGTGCACAGGGGCAAAACAATGGGGTCTGCTGGCATGACAAGGTGTATGTTACAGTTTTTGACAACACCCGGGGTACCAATTTCA
Equus_ferus_caballus_papillomavirus_type_7_complete_genome_JX035935.1	7619	6279	6391	NODE_63_length_7931_cov_5.291698	2252	2364	113	77.876	2.22e-17	CCTTACTGGCTGCAGCGTGCACAGGGGCAAAACAATGGGGTCTGCTGGCATGACAAGGTGTATGTTACAGTTTTTGACAACACCCGGGGTACCAATTTCAGCATCAGTGTCAA
Equus_ferus_caballus_papillomavirus_type_7_complete_genome_NC_020501.1	7619	6279	6391	NODE_63_length_7931_cov_5.291698	2252	2364	113	77.876	2.22e-17	CCTTACTGGCTGCAGCGTGCACAGGGGCAAAACAATGGGGTCTGCTGGCATGACAAGGTGTATGTTACAGTTTTTGACAACACCCGGGGTACCAATTTCAGCATCAGTGTCAA
Equine_papillomavirus_3_isolate_Haflinger_GU384895.1_complete_genome	7582	2091	2200	NODE_12937_length_267_cov_1.468421	224	115	110	70.909	1.59e-06	GTGCTGTCCTTTGCAAACAGCCAAAGCCACTTTTGGCTTATGCCCCTGGCAGATACCAGGGTTGCCCTGCTGGACGATGCCACATGGCCCGTCTGGGACTATTTTGACAC
Equine_papillomavirus_3_complete_genome_NC_017862.1	7582	2091	2200	NODE_12937_length_267_cov_1.468421	224	115	110	70.909	1.59e-06	GTGCTGTCCTTTGCAAACAGCCAAAGCCACTTTTGGCTTATGCCCCTGGCAGATACCAGGGTTGCCCTGCTGGACGATGCCACATGGCCCGTCTGGGACTATTTTGACAC
Equus_caballus_papillomavirus_9_strain_complete_genome_SW_MN117918.1	7656	56	149	NODE_63_length_7931_cov_5.291698	2889	2991	106	75.472	8.88e-10	ATGTGTCATG-TCTTTC--TGCACCGCGCCCGCTGGTGGCATGCACGCACCCAATGAGTCCCTTATCCGCAGCGCTGCTGGTGCACGTATAAGAGCGCACCTGGTG
Equus_caballus_papillomavirus_8_strain_NCSU_complete_genome_KU963288.1	8155	7013	7115	NODE_63_length_7931_cov_5.291698	2241	2343	103	73.786	3.3e-09	TCTTTAACAGGCCTTACTGGCTGCAGCGTGCACAGGGGCAAAACAATGGGGTCTGCTGGCATGACAAGGTGTATGTTACAGTTTTTGACAACACCCGGGGTAC
Equus_caballus_papillomavirus_8_strain_NCSU_complete_genome_NC_031756.1	8155	7013	7115	NODE_63_length_7931_cov_5.291698	2241	2343	103	73.786	3.3e-09	TCTTTAACAGGCCTTACTGGCTGCAGCGTGCACAGGGGCAAAACAATGGGGTCTGCTGGCATGACAAGGTGTATGTTACAGTTTTTGACAACACCCGGGGTAC
Equus_caballus_papillomavirus_8_strain_NCSU_complete_genome_KU963288.1	8155	2814	2914	NODE_63_length_7931_cov_5.291698	6479	6579	101	69.307	0.011	CTTTGCAGGCGAGCCCTGGAGTATGACAGATGTCAGCCGCGAAATGTACGCGGCCCCGCCTTGCGATACGTTCAAAAAGGGAGGGTACGTTGTCGAGGTGC
Equus_caballus_papillomavirus_8_strain_NCSU_complete_genome_NC_031756.1	8155	2814	2914	NODE_63_length_7931_cov_5.291698	6479	6579	101	69.307	0.011	CTTTGCAGGCGAGCCCTGGAGTATGACAGATGTCAGCCGCGAAATGTACGCGGCCCCGCCTTGCGATACGTTCAAAAAGGGAGGGTACGTTGTCGAGGTGC
Equus_caballus_papillomavirus_8_strain_NCSU_complete_genome_KU963288.1	8155	2496	2588	NODE_63_length_7931_cov_5.291698	6161	6253	94	84.043	1.95e-18	TCTCTTTTTAAAAGGTTGTGGCAACGCTTAGAATTGAGTGACCAGGAGGACGAGGGAGACGATGGAGAACCT-ACACAGGGCTTTAGATGCACT
Equus_caballus_papillomavirus_8_strain_NCSU_complete_genome_NC_031756.1	8155	2496	2588	NODE_63_length_7931_cov_5.291698	6161	6253	94	84.043	1.95e-18	TCTCTTTTTAAAAGGTTGTGGCAACGCTTAGAATTGAGTGACCAGGAGGACGAGGGAGACGATGGAGAACCT-ACACAGGGCTTTAGATGCACT
Equus_caballus_papillomavirus_9_strain_complete_genome_SW_MN117918.1	7656	74	149	NODE_2978_length_499_cov_0.879147	487	400	88	70.455	0.003	TTGCACCGCACCCGGTGCCGGTATGCGCCCCCACCCCATGAGTGGACAGGGAGCGCTGCCGGTGCACGCTATAAGACCGCACCTGCTG
Equus_caballus_papillomavirus_8_strain_NCSU_complete_genome_KU963288.1	8155	6532	6608	NODE_63_length_7931_cov_5.291698	1763	1839	79	74.684	0.011	AATATGGGCTTCGATGTGAAGCAGTCTCAG--CTTTTGATGGTGGGCTGCAAGCCGGCCATCGGCGAGCACTGGACCAA
Equus_caballus_papillomavirus_8_strain_NCSU_complete_genome_NC_031756.1	8155	6532	6608	NODE_63_length_7931_cov_5.291698	1763	1839	79	74.684	0.011	AATATGGGCTTCGATGTGAAGCAGTCTCAG--CTTTTGATGGTGGGCTGCAAGCCGGCCATCGGCGAGCACTGGACCAA
Equus_ferus_caballus_papillomavirus_type_5_complete_genome_JQ031033.1	7519	4084	4158	NODE_63_length_7931_cov_5.291698	7740	7814	75	86.667	2.19e-17	GGACACTGTGGCTGACCGCATTCTAAAATGGCTCAGCTCCTTCCTTTACCTTGGGAACCTGGGTATTGGCACTGG
Equus_ferus_caballus_papillomavirus_type_5_complete_genome_NC_020084.1	7519	4084	4158	NODE_63_length_7931_cov_5.291698	7740	7814	75	86.667	2.19e-17	GGACACTGTGGCTGACCGCATTCTAAAATGGCTCAGCTCCTTCCTTTACCTTGGGAACCTGGGTATTGGCACTGG
Equus_ferus_caballus_papillomavirus_type_7_complete_genome_JX035935.1	7619	2457	2529	NODE_63_length_7931_cov_5.291698	6154	6227	74	78.378	1.31e-07	TTGGAAATCTCTTTTTAAAAGGTTGTGGCAACGCTTAGAATTGAGTGACCAGGAGGACGAGGGAGACGATGGAG
Equus_ferus_caballus_papillomavirus_type_7_complete_genome_NC_020501.1	7619	2457	2529	NODE_63_length_7931_cov_5.291698	6154	6227	74	78.378	1.31e-07	TTGGAAATCTCTTTTTAAAAGGTTGTGGCAACGCTTAGAATTGAGTGACCAGGAGGACGAGGGAGACGATGGAG
Equus_ferus_caballus_papillomavirus_type_5_complete_genome_JQ031033.1	7519	3362	3432	NODE_63_length_7931_cov_5.291698	7060	7130	72	75	0.01	GAGGCCCGGGGCTATTGGGA-ACCCCCCCTTCCCCCGCCCTTCTGCAGGGCGAGGATGCGCCGGACTCATCT
Equus_ferus_caballus_papillomavirus_type_5_complete_genome_NC_020084.1	7519	3362	3432	NODE_63_length_7931_cov_5.291698	7060	7130	72	75	0.01	GAGGCCCGGGGCTATTGGGA-ACCCCCCCTTCCCCCGCCCTTCTGCAGGGCGAGGATGCGCCGGACTCATCT
Equus_caballus_papillomavirus_8_strain_NCSU_complete_genome_KU963288.1	8155	6283	6350	NODE_63_length_7931_cov_5.291698	1505	1572	68	77.941	1.71e-06	GTTCCCAAGGTGTCCTCTAATCAGTACAGGGTGTTTGAGGTAGTTCTCCCAAATCCCAACAAATTTGC
Equus_caballus_papillomavirus_8_strain_NCSU_complete_genome_NC_031756.1	8155	6283	6350	NODE_63_length_7931_cov_5.291698	1505	1572	68	77.941	1.71e-06	GTTCCCAAGGTGTCCTCTAATCAGTACAGGGTGTTTGAGGTAGTTCTCCCAAATCCCAACAAATTTGC
Equus_caballus_papillomavirus_8_strain_NCSU_complete_genome_KU963288.1	8155	3820	3877	NODE_382_length_1966_cov_5.266278	408	352	59	84.746	4.02e-08	CCCCTGCCCCATCCC--GCCCGCACCCCCAGCCCCGGCCCCAGCCCCAGCCCCCGCCCC
Equus_caballus_papillomavirus_8_strain_NCSU_complete_genome_NC_031756.1	8155	3820	3877	NODE_382_length_1966_cov_5.266278	408	352	59	84.746	4.02e-08	CCCCTGCCCCATCCC--GCCCGCACCCCCAGCCCCGGCCCCAGCCCCAGCCCCCGCCCC
Equus_caballus_papillomavirus_1_strain_150904_complete_genome_MF288893.1	7613	855	907	NODE_63_length_7931_cov_5.291698	4562	4617	56	76.786	0.035	CAGGGAAATTCCCTAGCACTGTTCCAGCAGCAGCAGGCGAGGGAAACGGAGGAGCA
Equus_caballus_papillomavirus_1_isolate_G2_complete_genome_MN164462.1	7611	855	907	NODE_63_length_7931_cov_5.291698	4562	4617	56	75	0.43	CAGGGAAATTCCCTAGCACTGTTCCAGCAGCAGCAGGCGAGGGAAACGGAGGAGCA
Equus_caballus_papillomavirus_type_1_complete_genome_AF498323.1	7610	855	907	NODE_63_length_7931_cov_5.291698	4562	4617	56	76.786	0.035	CAGGGAAATTCCCTAGCACTGTTCCAGCAGCAGCAGGCGAGGGAAACGGAGGAGCA
Equus_caballus_papillomavirus_type_1_complete_genome_NC_003748.1	7610	855	907	NODE_63_length_7931_cov_5.291698	4562	4617	56	76.786	0.035	CAGGGAAATTCCCTAGCACTGTTCCAGCAGCAGCAGGCGAGGGAAACGGAGGAGCA
Equine_papillomavirus_type_6_complete_genome_JQ965698.1	7551	290	342	NODE_66_length_7461_cov_2.964924	1110	1059	54	79.63	0.42	AAGAATTTCAGGGCAA-CCCATTTGCACGATT-AAGATACACTGCAAATATTGC
Equine_papillomavirus_type_6_complete_genome_NC_020500.1	7551	290	342	NODE_66_length_7461_cov_2.964924	1110	1059	54	79.63	0.42	AAGAATTTCAGGGCAA-CCCATTTGCACGATT-AAGATACACTGCAAATATTGC
Equine_papillomavirus_type_6_complete_genome_JQ965698.1	7551	1683	1735	NODE_63_length_7931_cov_5.291698	5378	5430	53	75.472	0.42	GAGGAGGCGATGAAATTTGAGTTTTCAGACATGGTGCAGTGGGCCTATGACAA
Equine_papillomavirus_type_6_complete_genome_NC_020500.1	7551	1683	1735	NODE_63_length_7931_cov_5.291698	5378	5430	53	75.472	0.42	GAGGAGGCGATGAAATTTGAGTTTTCAGACATGGTGCAGTGGGCCTATGACAA
Equus_caballus_papillomavirus_8_strain_NCSU_complete_genome_KU963288.1	8155	3820	3868	NODE_382_length_1966_cov_5.266278	385	336	50	86	1.71e-06	CCCCAGCCCCGGCCCCAGCCCCAGCCCCCGCCCCCACCGGCGGCCCCAGC
Equus_caballus_papillomavirus_8_strain_NCSU_complete_genome_NC_031756.1	8155	3820	3868	NODE_382_length_1966_cov_5.266278	385	336	50	86	1.71e-06	CCCCAGCCCCGGCCCCAGCCCCAGCCCCCGCCCCCACCGGCGGCCCCAGC
Equus_caballus_papillomavirus_8_strain_NCSU_complete_genome_KU963288.1	8155	3832	3879	NODE_382_length_1966_cov_5.266278	408	362	49	83.673	0.000886	CCCCTGCCCCATCCC--GCCCGCACCCCCAGCCCCGGCCCCAGCCCCAG
Equus_caballus_papillomavirus_8_strain_NCSU_complete_genome_NC_031756.1	8155	3832	3879	NODE_382_length_1966_cov_5.266278	408	362	49	83.673	0.000886	CCCCTGCCCCATCCC--GCCCGCACCCCCAGCCCCGGCCCCAGCCCCAG
Equus_ferus_caballus_papillomavirus_type_4_complete_genome_NC_020085.1	7554	3119	3161	NODE_10946_length_290_cov_0.619718	208	163	46	80.435	0.43	GGCCCGCCGCCTCCCCCTCCGGGCTCGCAGCGGGCCCCGCCGAGCC
Equus_ferus_caballus_papillomavirus_type_4_complete_genome_JQ031032.1	7554	3119	3161	NODE_10946_length_290_cov_0.619718	208	163	46	80.435	0.43	GGCCCGCCGCCTCCCCCTCCGGGCTCGCAGCGGGCCCCGCCGAGCC
Equus_ferus_caballus_papillomavirus_type_5_complete_genome_JQ031033.1	7519	2879	2919	NODE_63_length_7931_cov_5.291698	6601	6641	42	83.333	0.42	ACGCCATGTGGTATACAGGCTGGCAGC-ATGTCTACTACCAG
Equus_ferus_caballus_papillomavirus_type_5_complete_genome_NC_020084.1	7519	2879	2919	NODE_63_length_7931_cov_5.291698	6601	6641	42	83.333	0.42	ACGCCATGTGGTATACAGGCTGGCAGC-ATGTCTACTACCAG
Equus_caballus_papillomavirus_8_strain_NCSU_complete_genome_KU963288.1	8155	4179	4218	NODE_7106_length_345_cov_0.694030	102	62	41	82.927	0.13	AGGTGCAGCGCGAACGCCAGAGCTGGCCATGGTGCCCAGGG
Equus_caballus_papillomavirus_8_strain_NCSU_complete_genome_NC_031756.1	8155	4179	4218	NODE_7106_length_345_cov_0.694030	102	62	41	82.927	0.13	AGGTGCAGCGCGAACGCCAGAGCTGGCCATGGTGCCCAGGG
Equus_caballus_papillomavirus_2_isolate_XJ-ks1391_complete_genome_MW410986.1	7802	5140	5178	NODE_7782_length_333_cov_0.968750	285	247	39	82.051	0.13	GCAGGGAGCCTGGGTGTGGGTCAGCAGGGAAGGTAAGCG
Equine_papillomavirus_2_complete_genome_EU503122.1	7802	5140	5178	NODE_7782_length_333_cov_0.968750	285	247	39	82.051	0.13	GCAGGGAGCCTGGGTGTGGGTCAGCAGGGAAGGTAAGCG
Equine_papillomavirus_2_complete_genome_NC_012123.1	7802	5140	5178	NODE_7782_length_333_cov_0.968750	285	247	39	82.051	0.13	GCAGGGAGCCTGGGTGTGGGTCAGCAGGGAAGGTAAGCG
Equus_ferus_caballus_papillomavirus_type_4_complete_genome_NC_020085.1	7554	4206	4239	NODE_63_length_7931_cov_5.291698	63	99	37	83.784	0.12	TGCTCAGGGGGGCGGCAGTGTCCGCGTGGGCACCCCC
Equus_ferus_caballus_papillomavirus_type_4_complete_genome_JQ031032.1	7554	4206	4239	NODE_63_length_7931_cov_5.291698	63	99	37	83.784	0.12	TGCTCAGGGGGGCGGCAGTGTCCGCGTGGGCACCCCC
Equus_caballus_papillomavirus_8_strain_NCSU_complete_genome_KU963288.1	8155	506	542	NODE_25024_length_230_cov_0.810458	195	159	37	83.784	0.038	GAGGAGGAAGAGGAGGAGGCGGCGGCCCAGGAGGAGG
Equus_caballus_papillomavirus_8_strain_NCSU_complete_genome_NC_031756.1	8155	506	542	NODE_25024_length_230_cov_0.810458	195	159	37	83.784	0.038	GAGGAGGAAGAGGAGGAGGCGGCGGCCCAGGAGGAGG
Equus_caballus_papillomavirus_8_strain_NCSU_complete_genome_KU963288.1	8155	3819	3853	NODE_484_length_1601_cov_24.731070	1437	1471	35	82.857	0.46	GCCGCAGCCCCCACCCCGCCCCCCGCCCCAGCCCC
Equus_caballus_papillomavirus_8_strain_NCSU_complete_genome_NC_031756.1	8155	3819	3853	NODE_484_length_1601_cov_24.731070	1437	1471	35	82.857	0.46	GCCGCAGCCCCCACCCCGCCCCCCGCCCCAGCCCC
Equus_caballus_papillomavirus_2_isolate_XJ-ks1391_complete_genome_MW410986.1	7802	1441	1474	NODE_63_length_7931_cov_5.291698	4929	4896	34	88.235	0.003	CTGGCACGCAGCACGTCCAAGTGCTGCGTGCCAG
Equine_papillomavirus_2_isolate_Zurich_2009_HM461973.1_complete_genome	7803	1442	1475	NODE_63_length_7931_cov_5.291698	4929	4896	34	88.235	0.003	CTGGCACGCAGCACGTCCAAGTGCTGCGTGCCAG
Equine_papillomavirus_2_complete_genome_EU503122.1	7802	1441	1474	NODE_63_length_7931_cov_5.291698	4929	4896	34	88.235	0.003	CTGGCACGCAGCACGTCCAAGTGCTGCGTGCCAG
Equine_papillomavirus_2_complete_genome_NC_012123.1	7802	1441	1474	NODE_63_length_7931_cov_5.291698	4929	4896	34	88.235	0.003	CTGGCACGCAGCACGTCCAAGTGCTGCGTGCCAG
Equus_ferus_caballus_papillomavirus_type_5_complete_genome_JQ031033.1	7519	2474	2506	NODE_8985_length_315_cov_1.470588	63	95	33	87.879	0.01	GCAGGAGGAGGAGGAGGCGGGGGGCGACGGCGA
Equus_ferus_caballus_papillomavirus_type_5_complete_genome_NC_020084.1	7519	2474	2506	NODE_8985_length_315_cov_1.470588	63	95	33	87.879	0.01	GCAGGAGGAGGAGGAGGCGGGGGGCGACGGCGA
Equus_caballus_papillomavirus_8_strain_NCSU_complete_genome_KU963288.1	8155	3833	3864	NODE_1604_length_680_cov_0.693201	220	252	33	96.97	2.08e-05	CCCAGCCCCAGCCCCAGCCCCAGCCCAGAGCCC
Equus_caballus_papillomavirus_8_strain_NCSU_complete_genome_KU963288.1	8155	3828	3856	NODE_24951_length_230_cov_0.862745	101	69	33	87.879	0.46	CCAGCCACCAGCCCCAGCCCCAGGGACCCCAGC
Equus_caballus_papillomavirus_8_strain_NCSU_complete_genome_NC_031756.1	8155	3833	3864	NODE_1604_length_680_cov_0.693201	220	252	33	96.97	2.08e-05	CCCAGCCCCAGCCCCAGCCCCAGCCCAGAGCCC
Equus_caballus_papillomavirus_8_strain_NCSU_complete_genome_NC_031756.1	8155	3828	3856	NODE_24951_length_230_cov_0.862745	101	69	33	87.879	0.46	CCAGCCACCAGCCCCAGCCCCAGGGACCCCAGC
Equus_caballus_papillomavirus_9_strain_complete_genome_SW_MN117918.1	7656	571	603	NODE_2978_length_499_cov_0.879147	39	7	33	87.879	0.01	TTTGCTAGAGAGATGGTTGTTAACAACAATTAG
Equine_papillomavirus_type_6_complete_genome_JQ965698.1	7551	6844	6871	NODE_22265_length_237_cov_1.162500	99	70	30	90	0.12	TAATATATTTTCTAATTGTTTTACAAATCC
Equine_papillomavirus_type_6_complete_genome_NC_020500.1	7551	6844	6871	NODE_22265_length_237_cov_1.162500	99	70	30	90	0.12	TAATATATTTTCTAATTGTTTTACAAATCC
Equus_caballus_papillomavirus_8_strain_NCSU_complete_genome_KU963288.1	8155	3818	3847	NODE_382_length_1966_cov_5.266278	381	352	30	93.333	0.000886	AGCCCCGGCCCCAGCCCCAGCCCCCGCCCC
Equus_caballus_papillomavirus_8_strain_NCSU_complete_genome_KU963288.1	8155	3840	3869	NODE_5424_length_384_cov_0.615635	319	290	30	86.667	0.46	CCGGCCCCAGCCCCGGCCCGAGCGCCGGCC
Equus_caballus_papillomavirus_8_strain_NCSU_complete_genome_NC_031756.1	8155	3818	3847	NODE_382_length_1966_cov_5.266278	381	352	30	93.333	0.000886	AGCCCCGGCCCCAGCCCCAGCCCCCGCCCC
Equus_caballus_papillomavirus_8_strain_NCSU_complete_genome_NC_031756.1	8155	3840	3869	NODE_5424_length_384_cov_0.615635	319	290	30	86.667	0.46	CCGGCCCCAGCCCCGGCCCGAGCGCCGGCC
Equus_caballus_papillomavirus_8_strain_NCSU_complete_genome_KU963288.1	8155	3812	3840	NODE_6938_length_348_cov_0.915129	186	214	29	89.655	0.13	AGCCTGAGCCCTAGCCCCTGCCCCACCCC
Equus_caballus_papillomavirus_8_strain_NCSU_complete_genome_NC_031756.1	8155	3812	3840	NODE_6938_length_348_cov_0.915129	186	214	29	89.655	0.13	AGCCTGAGCCCTAGCCCCTGCCCCACCCC
Equus_caballus_papillomavirus_8_strain_NCSU_complete_genome_KU963288.1	8155	3848	3875	NODE_8279_length_325_cov_0.862903	320	293	28	89.286	0.46	AGCCCGAGCCCGAGCCCGAGCCCGAGCC
Equus_caballus_papillomavirus_8_strain_NCSU_complete_genome_KU963288.1	8155	3842	3869	NODE_8279_length_325_cov_0.862903	320	293	28	89.286	0.46	AGCCCGAGCCCGAGCCCGAGCCCGAGCC
Equus_caballus_papillomavirus_8_strain_NCSU_complete_genome_KU963288.1	8155	6047	6074	NODE_4237_length_426_cov_0.962751	393	366	28	89.286	0.46	AAAAAATAAAAAAAAAAAGAAAACAAAA
Equus_caballus_papillomavirus_8_strain_NCSU_complete_genome_NC_031756.1	8155	3848	3875	NODE_8279_length_325_cov_0.862903	320	293	28	89.286	0.46	AGCCCGAGCCCGAGCCCGAGCCCGAGCC
Equus_caballus_papillomavirus_8_strain_NCSU_complete_genome_NC_031756.1	8155	3842	3869	NODE_8279_length_325_cov_0.862903	320	293	28	89.286	0.46	AGCCCGAGCCCGAGCCCGAGCCCGAGCC
Equus_caballus_papillomavirus_8_strain_NCSU_complete_genome_NC_031756.1	8155	6047	6074	NODE_4237_length_426_cov_0.962751	393	366	28	89.286	0.46	AAAAAATAAAAAAAAAAAGAAAACAAAA
Equus_ferus_caballus_papillomavirus_type_4_complete_genome_NC_020085.1	7554	2632	2657	NODE_15966_length_254_cov_0.644068	179	205	27	92.593	0.43	GGCCACATGCCCTTTCCCCAGCTTGGT
Equus_ferus_caballus_papillomavirus_type_4_complete_genome_JQ031032.1	7554	2632	2657	NODE_15966_length_254_cov_0.644068	179	205	27	92.593	0.43	GGCCACATGCCCTTTCCCCAGCTTGGT
Equus_caballus_papillomavirus_2_isolate_XJ-ks1391_complete_genome_MW410986.1	7802	3397	3422	NODE_19338_length_245_cov_0.738095	169	194	26	96.154	0.01	GCGCCGCCCGGGAGCGGAGGACGAGG
Equine_papillomavirus_2_isolate_Zurich_2009_HM461973.1_complete_genome	7803	3398	3423	NODE_19338_length_245_cov_0.738095	169	194	26	96.154	0.01	GCGCCGCCCGGGAGCGGAGGACGAGG
Equine_papillomavirus_2_complete_genome_EU503122.1	7802	3397	3422	NODE_19338_length_245_cov_0.738095	169	194	26	96.154	0.01	GCGCCGCCCGGGAGCGGAGGACGAGG
Equine_papillomavirus_2_complete_genome_NC_012123.1	7802	3397	3422	NODE_19338_length_245_cov_0.738095	169	194	26	96.154	0.01	GCGCCGCCCGGGAGCGGAGGACGAGG
Equine_papillomavirus_type_6_complete_genome_JQ965698.1	7551	2800	2825	NODE_13465_length_264_cov_0.989305	115	90	26	92.308	0.12	GAGCCCTGGACAATGACTGACACCAG
Equine_papillomavirus_type_6_complete_genome_NC_020500.1	7551	2800	2825	NODE_13465_length_264_cov_0.989305	115	90	26	92.308	0.12	GAGCCCTGGACAATGACTGACACCAG
Equus_caballus_papillomavirus_8_strain_NCSU_complete_genome_KU963288.1	8155	3821	3846	NODE_1604_length_680_cov_0.693201	220	245	26	100	0.000254	CCCAGCCCCAGCCCCAGCCCCAGCCC
Equus_caballus_papillomavirus_8_strain_NCSU_complete_genome_KU963288.1	8155	3827	3852	NODE_1604_length_680_cov_0.693201	220	245	26	100	0.000254	CCCAGCCCCAGCCCCAGCCCCAGCCC
Equus_caballus_papillomavirus_8_strain_NCSU_complete_genome_KU963288.1	8155	3845	3870	NODE_1604_length_680_cov_0.693201	220	245	26	96.154	0.011	CCCAGCCCCAGCCCCAGCCCCAGCCC
Equus_caballus_papillomavirus_8_strain_NCSU_complete_genome_KU963288.1	8155	3851	3876	NODE_1604_length_680_cov_0.693201	220	245	26	96.154	0.011	CCCAGCCCCAGCCCCAGCCCCAGCCC
Equus_caballus_papillomavirus_8_strain_NCSU_complete_genome_NC_031756.1	8155	3821	3846	NODE_1604_length_680_cov_0.693201	220	245	26	100	0.000254	CCCAGCCCCAGCCCCAGCCCCAGCCC
Equus_caballus_papillomavirus_8_strain_NCSU_complete_genome_NC_031756.1	8155	3827	3852	NODE_1604_length_680_cov_0.693201	220	245	26	100	0.000254	CCCAGCCCCAGCCCCAGCCCCAGCCC
Equus_caballus_papillomavirus_8_strain_NCSU_complete_genome_NC_031756.1	8155	3845	3870	NODE_1604_length_680_cov_0.693201	220	245	26	96.154	0.011	CCCAGCCCCAGCCCCAGCCCCAGCCC
Equus_caballus_papillomavirus_8_strain_NCSU_complete_genome_NC_031756.1	8155	3851	3876	NODE_1604_length_680_cov_0.693201	220	245	26	96.154	0.011	CCCAGCCCCAGCCCCAGCCCCAGCCC
Equus_caballus_papillomavirus_8_strain_NCSU_complete_genome_KU963288.1	8155	3673	3697	NODE_8279_length_325_cov_0.862903	321	297	25	96	0.038	GAGCCCGAGCCCGAGCCCGAGCCCG
Equus_caballus_papillomavirus_8_strain_NCSU_complete_genome_KU963288.1	8155	6894	6918	NODE_4069_length_433_cov_2.078652	174	198	25	92	0.46	TGGAGGCAAGGAACTGCCCGCCACC
Equus_caballus_papillomavirus_8_strain_NCSU_complete_genome_NC_031756.1	8155	3673	3697	NODE_8279_length_325_cov_0.862903	321	297	25	96	0.038	GAGCCCGAGCCCGAGCCCGAGCCCG
Equus_caballus_papillomavirus_8_strain_NCSU_complete_genome_NC_031756.1	8155	6894	6918	NODE_4069_length_433_cov_2.078652	174	198	25	92	0.46	TGGAGGCAAGGAACTGCCCGCCACC
Equus_caballus_papillomavirus_8_strain_NCSU_complete_genome_KU963288.1	8155	3672	3695	NODE_8279_length_325_cov_0.862903	316	293	24	95.833	0.13	CGAGCCCGAGCCCGAGCCCGAGCC
Equus_caballus_papillomavirus_8_strain_NCSU_complete_genome_NC_031756.1	8155	3672	3695	NODE_8279_length_325_cov_0.862903	316	293	24	95.833	0.13	CGAGCCCGAGCCCGAGCCCGAGCC
Equus_ferus_caballus_papillomavirus_type_5_complete_genome_JQ031033.1	7519	6463	6485	NODE_20279_length_243_cov_0.662651	105	127	23	95.652	0.42	CAAACAATATTTTCAATGTGTTC
Equus_ferus_caballus_papillomavirus_type_5_complete_genome_NC_020084.1	7519	6463	6485	NODE_20279_length_243_cov_0.662651	105	127	23	95.652	0.42	CAAACAATATTTTCAATGTGTTC
Equus_caballus_papillomavirus_8_strain_NCSU_complete_genome_KU963288.1	8155	3818	3840	NODE_1604_length_680_cov_0.693201	223	245	23	100	0.011	AGCCCCAGCCCCAGCCCCAGCCC
Equus_caballus_papillomavirus_8_strain_NCSU_complete_genome_KU963288.1	8155	3857	3879	NODE_1604_length_680_cov_0.693201	220	242	23	95.652	0.46	CCCAGCCCCAGCCCCAGCCCCAG
Equus_caballus_papillomavirus_8_strain_NCSU_complete_genome_NC_031756.1	8155	3818	3840	NODE_1604_length_680_cov_0.693201	223	245	23	100	0.011	AGCCCCAGCCCCAGCCCCAGCCC
Equus_caballus_papillomavirus_8_strain_NCSU_complete_genome_NC_031756.1	8155	3857	3879	NODE_1604_length_680_cov_0.693201	220	242	23	95.652	0.46	CCCAGCCCCAGCCCCAGCCCCAG
Equus_ferus_caballus_papillomavirus_type_4_complete_genome_NC_020085.1	7554	2401	2420	NODE_23433_length_234_cov_0.789809	164	183	20	100	0.43	GGAATTCCTTTTTTAAAAGG
Equus_ferus_caballus_papillomavirus_type_4_complete_genome_NC_020085.1	7554	5980	5999	NODE_9192_length_312_cov_1.582979	44	25	20	100	0.43	TGAGTTAGTGAGCACAGTCA
Equus_ferus_caballus_papillomavirus_type_4_complete_genome_JQ031032.1	7554	2401	2420	NODE_23433_length_234_cov_0.789809	164	183	20	100	0.43	GGAATTCCTTTTTTAAAAGG
Equus_ferus_caballus_papillomavirus_type_4_complete_genome_JQ031032.1	7554	5980	5999	NODE_9192_length_312_cov_1.582979	44	25	20	100	0.43	TGAGTTAGTGAGCACAGTCA
Equus_ferus_caballus_papillomavirus_type_5_complete_genome_JQ031033.1	7519	2428	2447	NODE_23433_length_234_cov_0.789809	164	183	20	100	0.42	GGAATTCCTTTTTTAAAAGG
Equus_ferus_caballus_papillomavirus_type_5_complete_genome_NC_020084.1	7519	2428	2447	NODE_23433_length_234_cov_0.789809	164	183	20	100	0.42	GGAATTCCTTTTTTAAAAGG
Equus_caballus_papillomavirus_9_strain_complete_genome_SW_MN117918.1	7656	5366	5385	NODE_1006_length_882_cov_6.848447	569	588	20	100	0.43	GCGCGCAGCCGGGCCTCGGC

## Sheet: ID2396_3-3
qseq ID	qlen	qstart	qend	subject ID	sstart	send	len	pident	evalue	seq
Equus_caballus_papillomavirus_2_isolate_XJ-ks1391_complete_genome_MW410986.1	7802	1	5840	NODE_66_length_7880_cov_5.870947	5841	1	5841	99.863	0	CGAGATGCCAAGCAGGCCAGTGCCCGCCAAGAGCTTTGGCGCTCTCTTCTGGTTACTTTGGCGCTGCACCCAGCCAATCTGCAGACTGGGTCTTTGTGAGTCAGCGAATCCTCTGCGGTGCACAGAGCCTTTTTCTAGAGAAGATTGTTGTGGACCACAATCATTAAGATATGCAGGAGGCCCCTGCATCGGAGACGTTCCGCGGAGCTCCAGAGGGAGAGTGAAGACTGCTGGCCACATGTCGATCGTTGGCCTTCTTTGCATCTTTTGTGGAAAGCCGTGTGGCTATGCTGATGACATTTGGTGGAACACAGCAGACCTGAACCTGGTTATGAGAGACGGCAAGCGCAAGGCCAGCTGCCAGACCTGCATGAGAGCAGCCTGCACGCTTGAGCGCCA…
Equine_papillomavirus_2_complete_genome_EU503122.1	7802	1	5840	NODE_66_length_7880_cov_5.870947	5841	1	5841	99.863	0	CGAGATGCCAAGCAGGCCAGTGCCCGCCAAGAGCTTTGGCGCTCTCTTCTGGTTACTTTGGCGCTGCACCCAGCCAATCTGCAGACTGGGTCTTTGTGAGTCAGCGAATCCTCTGCGGTGCACAGAGCCTTTTTCTAGAGAAGATTGTTGTGGACCACAATCATTAAGATATGCAGGAGGCCCCTGCATCGGAGACGTTCCGCGGAGCTCCAGAGGGAGAGTGAAGACTGCTGGCCACATGTCGATCGTTGGCCTTCTTTGCATCTTTTGTGGAAAGCCGTGTGGCTATGCTGATGACATTTGGTGGAACACAGCAGACCTGAACCTGGTTATGAGAGACGGCAAGCGCAAGGCCAGCTGCCAGACCTGCATGAGAGCAGCCTGCACGCTTGAGCGCCA…
Equine_papillomavirus_2_complete_genome_NC_012123.1	7802	1	5840	NODE_66_length_7880_cov_5.870947	5841	1	5841	99.863	0	CGAGATGCCAAGCAGGCCAGTGCCCGCCAAGAGCTTTGGCGCTCTCTTCTGGTTACTTTGGCGCTGCACCCAGCCAATCTGCAGACTGGGTCTTTGTGAGTCAGCGAATCCTCTGCGGTGCACAGAGCCTTTTTCTAGAGAAGATTGTTGTGGACCACAATCATTAAGATATGCAGGAGGCCCCTGCATCGGAGACGTTCCGCGGAGCTCCAGAGGGAGAGTGAAGACTGCTGGCCACATGTCGATCGTTGGCCTTCTTTGCATCTTTTGTGGAAAGCCGTGTGGCTATGCTGATGACATTTGGTGGAACACAGCAGACCTGAACCTGGTTATGAGAGACGGCAAGCGCAAGGCCAGCTGCCAGACCTGCATGAGAGCAGCCTGCACGCTTGAGCGCCA…
Equine_papillomavirus_2_isolate_Zurich_2009_HM461973.1_complete_genome	7803	2	5841	NODE_66_length_7880_cov_5.870947	5840	1	5840	99.144	0	GAGATGCCAAGCAGGCCAGTGCCCGCCAAGAGCTTTGGCGCTCTCTTCTGGTTACTTTGGCGCTGCACCCAGCCAATCTGCAGACTGGGTCTTTGTGAGTCAGCGAATCCTCTGCGGTGCACAGAGCCTTTTTCTAGAGAAGATTGTTGTGGACCACAATCATTAAGATATGCAGGAGGCCCCTGCATCGGAGACGTTCCGCGGAGCTCCAGAGGGAGAGTGAAGACTGCTGGCCACATGTCGATCGTTGGCCTTCTTTGCATCTTTTGTGGAAAGCCGTGTGGCTATGCTGATGACATTTGGTGGAACACAGCAGACCTGAACCTGGTTATGAGAGACGGCAAGCGCAAGGCCAGCTGCCAGACCTGCATGAGAGCAGCCTGCACGCTTGAGCGCCAT…
Equus_caballus_papillomavirus_2_isolate_XJ-ks1391_complete_genome_MW410986.1	7802	5764	7802	NODE_66_length_7880_cov_5.870947	7880	5842	2039	99.804	0	TGTCGGTGTTCTATCATGGTAACAGCGAGCGTATGCTCATGGTGGGCCACCCCTTCTTTGCCCTGAAAAATGACAGGGACAAGCTGGACGTTCCCAAGGTGTCCTCTAATCAGTACAGGGTGTTTGAGGTAGTTCTCCCAAATCCCAACAAATTTGCTCTTGCAGATCAGAACATTTACAACCCAGAGACCTCCAGACTTGTCTGGGCTCTCCGCGGTGTCGAGGTGTCACGGGGGCAGCCTCTGGGCATCGGGGTGACAGGAAGCACAGTGTTTAACAAGCTGTATGATGTAGAAAACCCAGGGAAACGACAGGAAGCTGCAGGGGAGCGCGAGGATAAGCGTGTTAATATGGGCTTCGATGTGAAGCAGTCTCAGCTTTTGATGGTGGGCTGCAAGC…
Equine_papillomavirus_2_isolate_Zurich_2009_HM461973.1_complete_genome	7803	5765	7803	NODE_66_length_7880_cov_5.870947	7880	5842	2039	98.774	0	TGTCGGTGTTCTATCATGGTAACAGCGAGCGTATGCTCATGGTGGGCCACCCCTTCTTTGCCCTGAAAAATGACAGGGACAAGCTGGACGTTCCCAAGGTGTCCTCTAATCAGTACAGGGTGTTTGAGGTAGTTCTCCCAAATCCCAACAAATTTGCTCTTGCAGATCAGAACATTTACAACCCAGAGACCTCCAGACTTGTCTGGGCTCTCCGCGGTGTCGAGGTGTCACGGGGGCAGCCTCTGGGCATCGGGGTGACAGGAAGCACAGTGTTTAACAAGCTGTATGATGTAGAAAACCCAGGGAAACGACAGGAAGCTGCAGGGGAGCGCGAGGATAAGCGTGTTAATATGGGCTTCGATGTGAAGCAGTCTCAGCTTTTGATGGTGGGCTGCAAGC…
Equine_papillomavirus_2_complete_genome_EU503122.1	7802	5764	7802	NODE_66_length_7880_cov_5.870947	7880	5842	2039	99.902	0	TGTCGGTGTTCTATCATGGTAACAGCGAGCGTATGCTCATGGTGGGCCACCCCTTCTTTGCCCTGAAAAATGACAGGGACAAGCTGGACGTTCCCAAGGTGTCCTCTAATCAGTACAGGGTGTTTGAGGTAGTTCTCCCAAATCCCAACAAATTTGCTCTTGCAGATCAGAACATTTACAACCCAGAGACCTCCAGACTTGTCTGGGCTCTCCGCGGTGTCGAGGTGTCACGGGGGCAGCCTCTGGGCATCGGGGTGACAGGAAGCACAGTGTTTAACAAGCTGTATGATGTAGAAAACCCAGGGAAACGACAGGAAGCTGCAGGGGAGCGCGAGGATAAGCGTGTTAATATGGGCTTCGATGTGAAGCAGTCTCAGCTTTTGATGGTGGGCTGCAAGC…
Equine_papillomavirus_2_complete_genome_NC_012123.1	7802	5764	7802	NODE_66_length_7880_cov_5.870947	7880	5842	2039	99.902	0	TGTCGGTGTTCTATCATGGTAACAGCGAGCGTATGCTCATGGTGGGCCACCCCTTCTTTGCCCTGAAAAATGACAGGGACAAGCTGGACGTTCCCAAGGTGTCCTCTAATCAGTACAGGGTGTTTGAGGTAGTTCTCCCAAATCCCAACAAATTTGCTCTTGCAGATCAGAACATTTACAACCCAGAGACCTCCAGACTTGTCTGGGCTCTCCGCGGTGTCGAGGTGTCACGGGGGCAGCCTCTGGGCATCGGGGTGACAGGAAGCACAGTGTTTAACAAGCTGTATGATGTAGAAAACCCAGGGAAACGACAGGAAGCTGCAGGGGAGCGCGAGGATAAGCGTGTTAATATGGGCTTCGATGTGAAGCAGTCTCAGCTTTTGATGGTGGGCTGCAAGC…
Equus_caballus_papillomavirus_9_strain_complete_genome_SW_MN117918.1	7656	1646	3203	NODE_66_length_7880_cov_5.870947	4578	3003	1598	65.707	2.19e-87	CCTCAAGTGAAGAGGCGGCTCTTCGAGCCCCC-GCAACCGGGAAGCGGGGGGCGTCCGGGTGTAAGCTATGAAGCTCACGGTTTTTACAGCAGGACGGACCTTCAGGTAGAGACACCGCTGGGCATACAGGGTGGACGGGTCC--CTCTGCGGAGCATAGAGAATGTGGTGGACAGTCACGCTGGCACGCAGCACTTGGACGTGCTGCGTGCCAGTAACAGGGAGGCGGCCATGTTAGGCCGCTTTAA-GA--CCTGTTTTGAAGTGGGATTTAATGAATTGACAAGGCCTTTTACTAGCAACAAGACCTGTGCCAAGCAGTGGGTGGTGCTTGCGTATTCTGTTCGGGAAGCCCTTTTTGAAGCAGCAAAAGAACTGCTGCGACAGCACTGTGACTAT…
Equus_caballus_papillomavirus_9_strain_complete_genome_SW_MN117918.1	7656	6250	7654	NODE_66_length_7880_cov_5.870947	7872	6474	1424	71.278	0	TTCTATCATGGTAACAGCGAGCGTATGCTCATGGTGGGCCACCCCTTCTTTGCCCTGAAAAATGACAGGGACAAGCTGGACGTTCCCAAGGTGTCCTCTAATCAGTACAGGGTGTTTGAGGTAGTTCTCCCAAATCCCAACAAATTTGCTCTTGCAGATCAGAACATTTACAACCCAGAGACCTCCAGACTTGTCTGGGCTCTCCGCGGTGTCGAGGTGTCACGGGGGCAGCCTCTGGGCATCGGGGTGACAGGAAGCACAGTGTTTAACAAGCTGTATGATGTAGAAAACCCAGGGAAACGACAGGAAGCTGCAGGGGAGCGCGAGGATAAGCGTGTTAATATGGGCTTCGATGTGAAGCAGTCTCAGCTTTTGATGGTGGGCTGCAAGCCGGCCATC…
Equus_ferus_caballus_papillomavirus_type_5_complete_genome_JQ031033.1	7519	5514	6634	NODE_66_length_7880_cov_5.870947	7869	6728	1156	65.744	8.56e-61	TATCATGGTAACAGCGAGCGTATGCTCATGGTGGGCCACCCCTTCTTTGCCCTGAAAAATGACAGGGACAAGCTGGACGTTCCCAAGGTGTCCTCTAATCAGTACAGGGTGTTTGAGGTAGTTCTCCCAAATCCCAACAAATTTGCTCTTGCAGATCAGAACATTTACAACCCAGAGACCTCCAGACTTGTCTGGGCTCTCCGCGGTGTCGAGGTGTCACGGGGGCAGCCTCTGGGCATCGGGGTGACAGGAAG-CACAGTGTTTAACAAGCTGTATGATGTAGAAAA-CCCAGGGAAACGAC--AGGAAGCTGCAGGGGAGCGCGAGGATAAGCGTGTTAATATGGGCTTCGATGTGAAGCAGTCTCAGCTTTTGATGGTGGGCTGCAAGCCGGCCAT…
Equus_ferus_caballus_papillomavirus_type_5_complete_genome_NC_020084.1	7519	5514	6634	NODE_66_length_7880_cov_5.870947	7869	6728	1156	65.744	8.56e-61	TATCATGGTAACAGCGAGCGTATGCTCATGGTGGGCCACCCCTTCTTTGCCCTGAAAAATGACAGGGACAAGCTGGACGTTCCCAAGGTGTCCTCTAATCAGTACAGGGTGTTTGAGGTAGTTCTCCCAAATCCCAACAAATTTGCTCTTGCAGATCAGAACATTTACAACCCAGAGACCTCCAGACTTGTCTGGGCTCTCCGCGGTGTCGAGGTGTCACGGGGGCAGCCTCTGGGCATCGGGGTGACAGGAAG-CACAGTGTTTAACAAGCTGTATGATGTAGAAAA-CCCAGGGAAACGAC--AGGAAGCTGCAGGGGAGCGCGAGGATAAGCGTGTTAATATGGGCTTCGATGTGAAGCAGTCTCAGCTTTTGATGGTGGGCTGCAAGCCGGCCAT…
Equus_ferus_caballus_papillomavirus_type_4_complete_genome_NC_020085.1	7554	5588	6639	NODE_66_length_7880_cov_5.870947	7800	6743	1074	66.853	1.19e-71	AAGCTGGACGTTCCCAAGGTGTCCTCTAATCAGTACAGGGTGTTTGAGGTAGTTCTCCCAAATCCCAACAAATTTGCTCTTGCAGATCAGAACATTTACAACCCAGAGACCTCCAGACTTGTCTGGGCTCTCCGCGGTGTCGAGGTGTCACGGGGGCAGCCTCTGGGCATCGGGGTGACAGGAAGCACAGTGTTTAACAAGCTGTATGATGTAGAAAACCCAGG--GAAACGACAGGA--AGCTGCA-GGGGAGCGCGAGGATAAGCGTGTTAATATGGGCTTCGATGTGAAGCAGTCTCAGCTTTTGATGGTGGGCTGCAAGCCGGCCATCGGCGAGCACTGGACCAAGGCAAGGCCGTGCAATGGCGGGGGTCCAGACGCCGCCTGCCCACCACTGG…
Equus_ferus_caballus_papillomavirus_type_4_complete_genome_JQ031032.1	7554	5588	6639	NODE_66_length_7880_cov_5.870947	7800	6743	1074	66.853	1.19e-71	AAGCTGGACGTTCCCAAGGTGTCCTCTAATCAGTACAGGGTGTTTGAGGTAGTTCTCCCAAATCCCAACAAATTTGCTCTTGCAGATCAGAACATTTACAACCCAGAGACCTCCAGACTTGTCTGGGCTCTCCGCGGTGTCGAGGTGTCACGGGGGCAGCCTCTGGGCATCGGGGTGACAGGAAGCACAGTGTTTAACAAGCTGTATGATGTAGAAAACCCAGG--GAAACGACAGGA--AGCTGCA-GGGGAGCGCGAGGATAAGCGTGTTAATATGGGCTTCGATGTGAAGCAGTCTCAGCTTTTGATGGTGGGCTGCAAGCCGGCCATCGGCGAGCACTGGACCAAGGCAAGGCCGTGCAATGGCGGGGGTCCAGACGCCGCCTGCCCACCACTGG…
Equus_caballus_papillomavirus_1_strain_150904_complete_genome_MF288893.1	7613	1629	2555	NODE_66_length_7880_cov_5.870947	3927	2998	945	66.561	3.45e-53	CACCAGTGTGAGGAGGCGATGAAATTTGAGTTTTCAGACATGGTGCAGTGGGCCTATGACAACCACG-TCACAGAGGAAAGTCAGATAGCATATGGGTACGCTAGCCTAGCGGACACTAATGCCAATGCTGCAGCATTTCT-GGCCTGCGCGTCTCAAGCTAAGTATGTGCGAGATGTGGCCACGATGGTCAAATATTACCGCAGAGCGGAGATGCAGAACATGTCAATATCTGAATGGATTCACAGGCAGGCAGAGAAAATAGAGGGGGAGGGCGATTGGCGGCCCATCATAAACTTTCTGAAGCACCAGGGCGTTGAAATCTCTGTGTTCATTAACAACCTGAAGCACTTTGTTAAGGGGGTCCCCAAA-AAAAATTGCATGGTGCTCGTGGGGCCA…
Equus_caballus_papillomavirus_type_1_complete_genome_AF498323.1	7610	1629	2555	NODE_66_length_7880_cov_5.870947	3927	2998	945	66.455	4.2e-52	CACCAGTGTGAGGAGGCGATGAAATTTGAGTTTTCAGACATGGTGCAGTGGGCCTATGACAACCACG-TCACAGAGGAAAGTCAGATAGCATATGGGTACGCTAGCCTAGCGGACACTAATGCCAATGCTGCAGCATTTCT-GGCCTGCGCGTCTCAAGCTAAGTATGTGCGAGATGTGGCCACGATGGTCAAATATTACCGCAGAGCGGAGATGCAGAACATGTCAATATCTGAATGGATTCACAGGCAGGCAGAGAAAATAGAGGGGGAGGGCGATTGGCGGCCCATCATAAACTTTCTGAAGCACCAGGGCGTTGAAATCTCTGTGTTCATTAACAACCTGAAGCACTTTGTTAAGGGGGTCCCCAAA-AAAAATTGCATGGTGCTCGTGGGGCCA…
Equus_caballus_papillomavirus_type_1_complete_genome_NC_003748.1	7610	1629	2555	NODE_66_length_7880_cov_5.870947	3927	2998	945	66.455	4.2e-52	CACCAGTGTGAGGAGGCGATGAAATTTGAGTTTTCAGACATGGTGCAGTGGGCCTATGACAACCACG-TCACAGAGGAAAGTCAGATAGCATATGGGTACGCTAGCCTAGCGGACACTAATGCCAATGCTGCAGCATTTCT-GGCCTGCGCGTCTCAAGCTAAGTATGTGCGAGATGTGGCCACGATGGTCAAATATTACCGCAGAGCGGAGATGCAGAACATGTCAATATCTGAATGGATTCACAGGCAGGCAGAGAAAATAGAGGGGGAGGGCGATTGGCGGCCCATCATAAACTTTCTGAAGCACCAGGGCGTTGAAATCTCTGTGTTCATTAACAACCTGAAGCACTTTGTTAAGGGGGTCCCCAAA-AAAAATTGCATGGTGCTCGTGGGGCCA…
Equus_caballus_papillomavirus_1_isolate_G2_complete_genome_MN164462.1	7611	1629	2555	NODE_66_length_7880_cov_5.870947	3927	2998	944	66.525	9.89e-54	CACCAGTGTGAGGAGGCGATGAAATTTGAGTTTTCAGACATGGTGCAGTGGGCCTATGACAACCACG-TCACAGAGGAAAGTCAGATAGCATATGGGTACGCTAGCCTAGCGGACACTAATGCCAATGCTGCAGCATTTCT-GGCCTGCGCGTCTCAAGCTAAGTATGTGCGAGATGTGGCCACGATGGTCAAATATTACCGCAGAGCGGAGATGCAGAACATGTCAATATCTGAATGGATTCACAGGCAGGCAGAGAAAATAGAGGGGGAGGGCGATTGGCGGCCCATCATAAACTTTCTGAAGCACCAGGGCGTTGAAATCTCTGTGTTCATTAACAACCTGAAGCACTTTGTTAAGGGGGTCCCCAAA-AAAAATTGCATGGTGCTCGTGGGGCCA…
Equus_ferus_caballus_papillomavirus_type_5_complete_genome_JQ031033.1	7519	1652	2576	NODE_66_length_7880_cov_5.870947	3919	2998	939	64.856	3.64e-40	TGAGGAGGCGATGAAATTTGAGTTTTCAGACATGGTGCAGTGGGCCTATGACAACCACGTCACAGAGGAAAGTCAGATAGCATATGGGTACGCTAGCCTAGCGGACACTAATGCCAATGCTGCAGCATTTCTGGCCTGCGCGTCTCAAGCTAAGTATGTGCGAGATGTGGCCACGATGGTCAAATATTACCGCAGAGCGGAGATGCAGAACATGTCAATATCTGAATGGATTCACAGGCAGG-CAGAGAAAATAGAGGGGGAGGGCGATTGGCGGCCCATCATAAACTTTCTGAAGCACCAGGGCGTTGAAATCTCTGTGTTCATTAACAACCTGAAGCACTTTGTTAAGGGGGTCCCCAAAAAAAATTGCATGGTGCTCGTGGGGCCACCAAACACTG…
Equus_ferus_caballus_papillomavirus_type_5_complete_genome_NC_020084.1	7519	1652	2576	NODE_66_length_7880_cov_5.870947	3919	2998	939	64.856	3.64e-40	TGAGGAGGCGATGAAATTTGAGTTTTCAGACATGGTGCAGTGGGCCTATGACAACCACGTCACAGAGGAAAGTCAGATAGCATATGGGTACGCTAGCCTAGCGGACACTAATGCCAATGCTGCAGCATTTCTGGCCTGCGCGTCTCAAGCTAAGTATGTGCGAGATGTGGCCACGATGGTCAAATATTACCGCAGAGCGGAGATGCAGAACATGTCAATATCTGAATGGATTCACAGGCAGG-CAGAGAAAATAGAGGGGGAGGGCGATTGGCGGCCCATCATAAACTTTCTGAAGCACCAGGGCGTTGAAATCTCTGTGTTCATTAACAACCTGAAGCACTTTGTTAAGGGGGTCCCCAAAAAAAATTGCATGGTGCTCGTGGGGCCACCAAACACTG…
Equus_ferus_caballus_papillomavirus_type_4_complete_genome_NC_020085.1	7554	1659	2540	NODE_66_length_7880_cov_5.870947	3885	3004	895	64.693	1.2e-33	GTGCAGTGGGCCTATGACAACCACGTCACAGAGGAAAGTCAGATAGCATATGGGTACGCTAGCCTAGCGGACACTAATGCCAATGCTGCAGCATTTCTGGCCTGCGCGTCTCAAGCTAAGTATGTGCGAGATGTGGCCACGATGGTCAAATATTACCGCAGAGCGGAGATGCAGAACATGTCAATATCTGAATGGATTCACAGGCAGGCAGAGAAAATAGAGGGGGAGGGCGATTGGCGGCCCATCATAAACTTTCTGAAGCACCAGGGCGTTGAAATC-TCTGTGTTCATTAACAACCTGAAGCACTTTGTTAAGGGGGTCCCCAAAAAAAATTGCATGGTGCTCGTGGGGCCACCAAACACTGGCAAGTC-CAGCTTTGCTGTGAGCTTGCTGGAGT…
Equus_ferus_caballus_papillomavirus_type_4_complete_genome_JQ031032.1	7554	1659	2540	NODE_66_length_7880_cov_5.870947	3885	3004	895	64.693	1.2e-33	GTGCAGTGGGCCTATGACAACCACGTCACAGAGGAAAGTCAGATAGCATATGGGTACGCTAGCCTAGCGGACACTAATGCCAATGCTGCAGCATTTCTGGCCTGCGCGTCTCAAGCTAAGTATGTGCGAGATGTGGCCACGATGGTCAAATATTACCGCAGAGCGGAGATGCAGAACATGTCAATATCTGAATGGATTCACAGGCAGGCAGAGAAAATAGAGGGGGAGGGCGATTGGCGGCCCATCATAAACTTTCTGAAGCACCAGGGCGTTGAAATC-TCTGTGTTCATTAACAACCTGAAGCACTTTGTTAAGGGGGTCCCCAAAAAAAATTGCATGGTGCTCGTGGGGCCACCAAACACTGGCAAGTC-CAGCTTTGCTGTGAGCTTGCTGGAGT…
Equus_caballus_papillomavirus_9_strain_complete_genome_SW_MN117918.1	7656	4639	5433	NODE_66_length_7880_cov_5.870947	1659	865	806	66.625	3.71e-59	CGCTGCCTGCCAAGCGGCGGCGCAGGGCTGCAGGGCAGGACCTGTACCGGGCCTGCAAGATGGGGGCGGACTGCATCCCTGATGTGAGGGCCAAATATGAGCAGGACACTGTGGCTGACCGCATTCTAAAATGGCTCAGCTCCTTCCTTTACCTTGGGAACCTGGGTATTGGCACTGGAAGAGGTGGGACGGGAGGAAGGCTTGGGTACCAGCCTGTGGGGCGCGGGGTTGC---TCAGGGGGGCGGCAGTGTCCGCGTGGGCACCCCCGTGTCTGTGCTGGAGCCCGGTGTAGGAGTGGAGACGGTGGGACCAAAGGACCTGGTGCCAGTGGACGCCTTGGGGCCCACCACTCCCTCTGTGGTGCCCCTGGGTGAGGGGGATGCCCTGGCG------C…
Equus_caballus_papillomavirus_1_strain_150904_complete_genome_MF288893.1	7613	5318	5991	NODE_66_length_7880_cov_5.870947	7870	7209	689	64.006	1.91e-18	CTATCATGGTAACAGCGAGCGTATGCTCATGGTGGGCCACCCCTTCTTTGCCCTGAAAAATGACAGGGAC--AAGC-TGGACGTTCCCAAGGTGTCCTCTAATCAGTACAGGGTGTTTGAG-GTAGTTCTCCCAAATCCCAACAAATTTGCTCTTGCAGATCAGAACATTTACAACCCAGAGACCTCCAGACTTGTCTGGGCTCTCCGCGGTGTCGAGGTGTCACGGGGGCAGCCTCT-GGGCATCGGGGTGACAGGAAGCACAGTGTTTAACAAGCTGTATGATGTAGAAAACCCAG----GGAAACGACAGGAAGCTGCAGGGGAGCGCGAGGATAAGCGTGTTAATATGGGCTTCGATGTGAAGCAGTCTCAGCTTTTGATGGTGGGCTGCAAGCC…
Equus_caballus_papillomavirus_type_1_complete_genome_AF498323.1	7610	5315	5988	NODE_66_length_7880_cov_5.870947	7870	7209	689	63.861	2.33e-17	CTATCATGGTAACAGCGAGCGTATGCTCATGGTGGGCCACCCCTTCTTTGCCCTGAAAAATGACAGGGAC--AAGC-TGGACGTTCCCAAGGTGTCCTCTAATCAGTACAGGGTGTTTGAG-GTAGTTCTCCCAAATCCCAACAAATTTGCTCTTGCAGATCAGAACATTTACAACCCAGAGACCTCCAGACTTGTCTGGGCTCTCCGCGGTGTCGAGGTGTCACGGGGGCAGCCTCT-GGGCATCGGGGTGACAGGAAGCACAGTGTTTAACAAGCTGTATGATGTAGAAAACCCAG----GGAAACGACAGGAAGCTGCAGGGGAGCGCGAGGATAAGCGTGTTAATATGGGCTTCGATGTGAAGCAGTCTCAGCTTTTGATGGTGGGCTGCAAGCC…
Equus_caballus_papillomavirus_type_1_complete_genome_NC_003748.1	7610	5315	5988	NODE_66_length_7880_cov_5.870947	7870	7209	689	63.861	2.33e-17	CTATCATGGTAACAGCGAGCGTATGCTCATGGTGGGCCACCCCTTCTTTGCCCTGAAAAATGACAGGGAC--AAGC-TGGACGTTCCCAAGGTGTCCTCTAATCAGTACAGGGTGTTTGAG-GTAGTTCTCCCAAATCCCAACAAATTTGCTCTTGCAGATCAGAACATTTACAACCCAGAGACCTCCAGACTTGTCTGGGCTCTCCGCGGTGTCGAGGTGTCACGGGGGCAGCCTCT-GGGCATCGGGGTGACAGGAAGCACAGTGTTTAACAAGCTGTATGATGTAGAAAACCCAG----GGAAACGACAGGAAGCTGCAGGGGAGCGCGAGGATAAGCGTGTTAATATGGGCTTCGATGTGAAGCAGTCTCAGCTTTTGATGGTGGGCTGCAAGCC…
Equus_caballus_papillomavirus_8_strain_NCSU_complete_genome_KU963288.1	8155	1740	2359	NODE_66_length_7880_cov_5.870947	3891	3272	629	63.911	3.46e-09	GACATGGTGCAGTGGGCCTATGACAACCACGTCACAGAGGAAAGTCAG-ATAGCATATGGGTACGCTAGCCTAGCGGACACTAATGCCAATGCTGCAGCATTTCTGGCCTGCGCGTCTCAAGCTAAGTATGTGCGAGA-TGTGGCCACGATGGTCAAATATTACCGCAGAGCGGAGATGCAGAACATGTCAATATCTGAATGGATTCACAGGCAGGCAGAGAAAATAGAGGGGGAGGGCGATTGGCGGCCCATCATAAACTTTCTGAAGCACCAGGGCGTTGAA---ATCTCTGTGTTCATTAACAACCTGAAGCACTTTGTTAAGGGGGTCCCCAAAAAAAATTGCATGGTGCTCGTGGGGCCACCAAACACTGGCAAGTCCAGCTT-TGCTGTGAGC…
Equus_caballus_papillomavirus_8_strain_NCSU_complete_genome_NC_031756.1	8155	1740	2359	NODE_66_length_7880_cov_5.870947	3891	3272	629	63.911	3.46e-09	GACATGGTGCAGTGGGCCTATGACAACCACGTCACAGAGGAAAGTCAG-ATAGCATATGGGTACGCTAGCCTAGCGGACACTAATGCCAATGCTGCAGCATTTCTGGCCTGCGCGTCTCAAGCTAAGTATGTGCGAGA-TGTGGCCACGATGGTCAAATATTACCGCAGAGCGGAGATGCAGAACATGTCAATATCTGAATGGATTCACAGGCAGGCAGAGAAAATAGAGGGGGAGGGCGATTGGCGGCCCATCATAAACTTTCTGAAGCACCAGGGCGTTGAA---ATCTCTGTGTTCATTAACAACCTGAAGCACTTTGTTAAGGGGGTCCCCAAAAAAAATTGCATGGTGCTCGTGGGGCCACCAAACACTGGCAAGTCCAGCTT-TGCTGTGAGC…
Equine_papillomavirus_type_6_complete_genome_JQ965698.1	7551	5512	5849	NODE_66_length_7880_cov_5.870947	7794	7454	342	63.743	0.003	GACGTTCCCAAGGTGTCCTCTAATCAGTACAGGGTGTTTGAGGTAGTTCTCCCAAATCCCAACAAATTTGCTCTTGCAGATCAGAACATTTACAACCCAGAGACCTCCAGACTTGTCTGGGCTCTCCGCGGTGTCGAGGTGTCACGGGGGCAGCCTCTGGGCATCGGGGTGACAGGAAGCACAGTGTTTAACAAGCTGTATGATGTAGAAAACCCAGGGAAACGACAGGAAGCTGCAGGGGAGCGCGAGGATAAGCGTGTTAATATGG-GCTTCGATGTGAAGCAGTCTCAGCTTTTGATGGTGGGCTGCAAGCCGGCCATCGGCGAGCACTGGACCAAGGC
Equine_papillomavirus_type_6_complete_genome_NC_020500.1	7551	5512	5849	NODE_66_length_7880_cov_5.870947	7794	7454	342	63.743	0.003	GACGTTCCCAAGGTGTCCTCTAATCAGTACAGGGTGTTTGAGGTAGTTCTCCCAAATCCCAACAAATTTGCTCTTGCAGATCAGAACATTTACAACCCAGAGACCTCCAGACTTGTCTGGGCTCTCCGCGGTGTCGAGGTGTCACGGGGGCAGCCTCTGGGCATCGGGGTGACAGGAAGCACAGTGTTTAACAAGCTGTATGATGTAGAAAACCCAGGGAAACGACAGGAAGCTGCAGGGGAGCGCGAGGATAAGCGTGTTAATATGG-GCTTCGATGTGAAGCAGTCTCAGCTTTTGATGGTGGGCTGCAAGCCGGCCATCGGCGAGCACTGGACCAAGGC
Equus_caballus_papillomavirus_9_strain_complete_genome_SW_MN117918.1	7656	5378	5694	NODE_9346_length_317_cov_0.966667	1	317	317	99.685	1.13e-160	GCCTCGGCGCGGTGTGTTTGGAAGGTTTTTTCAACAGGCTCCTGTGGAGGACCCTGTGTTTCTCTCCTCCCCTGGAAAGCTAGTGCAGTTTGGCTATGAAAACCCCACTTTTGATGCCTCTGGGAGCCTGGACTTTCCTTTTGGGGACGATGCTCCGGCTGCAGCGCCGGACCCTGCATTCCAGGACATCTATCATTTGGGACGGGAGGTTTTTACTGAGCGCGAGGGGCGCATAGGGGTCAGCAGAACGGGGTTGCGTGCAGGGGTGCACACGCGCAGTGGGGTGCGCTTGGGTCAGCCTGTCCATTTCCGCATGG
Equine_papillomavirus_type_6_complete_genome_JQ965698.1	7551	2256	2565	NODE_66_length_7880_cov_5.870947	3345	3042	316	65.823	6.2e-12	GATGGCAACCCCATTTCTGTGGACCAGAAGCATAAGCAGCCTCTGCAGCTGAGATGCCCCCCTCTGTTGATGACCACAAACG---TGGA-CATC--AGCCAGGAGTCCAAGTATTGGTACCTGCACAGTCGCATGATTGTGCTTAGATTCCCCAACCCCTTCCCTCTTGATGAAAACCAGCAGCCCGTATTTGAATTAACTGTGAAAAATTGGAAATCTCTTTTTAAAAGGTTGTGGCAACGCTTAGAATTGAGTGACCAGGAGGACGAGGG------AGACGATGGAGAACCTACACAGGGCTTTAGATGCACTG
Equine_papillomavirus_type_6_complete_genome_NC_020500.1	7551	2256	2565	NODE_66_length_7880_cov_5.870947	3345	3042	316	65.823	6.2e-12	GATGGCAACCCCATTTCTGTGGACCAGAAGCATAAGCAGCCTCTGCAGCTGAGATGCCCCCCTCTGTTGATGACCACAAACG---TGGA-CATC--AGCCAGGAGTCCAAGTATTGGTACCTGCACAGTCGCATGATTGTGCTTAGATTCCCCAACCCCTTCCCTCTTGATGAAAACCAGCAGCCCGTATTTGAATTAACTGTGAAAAATTGGAAATCTCTTTTTAAAAGGTTGTGGCAACGCTTAGAATTGAGTGACCAGGAGGACGAGGG------AGACGATGGAGAACCTACACAGGGCTTTAGATGCACTG
Equus_caballus_papillomavirus_1_isolate_G2_complete_genome_MN164462.1	7611	5315	5608	NODE_66_length_7880_cov_5.870947	7870	7580	296	66.216	1.13e-08	CTATCATGGTAACAGCGAGCGTATGCTCATGGTGGGCCACCCCTTCTTTGCCCTGAAAAATGACAGGGA-CAAGC--TGGACGTTCCCAAGGTGTCCTCTAATCAGTACAGGGTGTTTGAG-GTAGTTCTCCCAAATCCCAACAAATTTGCTCTTGCAGATCAGAACATTTACAACCCAGAGACCTCCAGACTTGTCTGGGCTCTCCGCGGTGTCGAGGTGTCACGGGGGCAGCCTCT-GGGCATCGGGGTGACAGGAAGCACAGTGTTTAACAAGCTGTATGATGTAGAAAACCC
Equus_ferus_caballus_papillomavirus_type_4_complete_genome_NC_020085.1	7554	4003	4239	NODE_66_length_7880_cov_5.870947	1636	1394	247	65.182	5.81e-06	AGGGCTGCAGGGCAGGACCTGTACCGGGCCTGCAAGATGGGGGCGGACTGCATCCCTGATGTGAGGGCCAAATATGAGCAGGACACTGTGGCTGACCGCATTCTAAAATGGCTCAGCTCCTTCCTTTACCTTGGGAACCTGGGTATTGGC---ACTGGAAGAGGTGGGACGGGAGGAAGGCTTGGGTACCAGCCTGTGGGGCGCGGG-GTTGCTCAGGGGGGCGGCAGTGTCCGCGTGGGCACCCCC
Equus_ferus_caballus_papillomavirus_type_4_complete_genome_JQ031032.1	7554	4003	4239	NODE_66_length_7880_cov_5.870947	1636	1394	247	65.182	5.81e-06	AGGGCTGCAGGGCAGGACCTGTACCGGGCCTGCAAGATGGGGGCGGACTGCATCCCTGATGTGAGGGCCAAATATGAGCAGGACACTGTGGCTGACCGCATTCTAAAATGGCTCAGCTCCTTCCTTTACCTTGGGAACCTGGGTATTGGC---ACTGGAAGAGGTGGGACGGGAGGAAGGCTTGGGTACCAGCCTGTGGGGCGCGGG-GTTGCTCAGGGGGGCGGCAGTGTCCGCGTGGGCACCCCC
Equus_caballus_papillomavirus_9_strain_complete_genome_SW_MN117918.1	7656	6087	6308	NODE_66_length_7880_cov_5.870947	232	11	222	69.369	1.92e-18	TTCGATCTGCACCCCTCCCTGCACCCCCGCAAACGCAAACGGCGGTACAATTGCTGTTTTGCAGATGGCTTTCTGGACAATGAACAGACAACACCTGTACCTCCCCCCCAATCCCGTCTCTAGGGTTTTGGGGACTGATGAGTATGTGAAGCGGCTGTCGGTGTTCTATCATGGTAACAGCGAGCGTATGCTCATGGTGGGCCACCCCTTCTTTGCCCTGAA
Equus_caballus_papillomavirus_9_strain_complete_genome_SW_MN117918.1	7656	1333	1525	NODE_66_length_7880_cov_5.870947	4891	4699	199	69.347	2.67e-10	GGACAATGACCCAGGTACTAGCCCAAGGGAGGGGACTAGTGGCGCAGCCTGTTTTCTGGATAGGGAGGCGCTGTGTAGCGACTGTGATAGTG---ATGACTTAGAG-GATTCCTCAGAAGGGATCGATGGGGCA--GACTTTGTCGACAATGCATTTGTCGGCCAGGGAAATTCCCTAGCACTGTTCCAGCAGCAGCAG
Equus_caballus_papillomavirus_1_isolate_G2_complete_genome_MN164462.1	7611	5799	5988	NODE_66_length_7880_cov_5.870947	7398	7209	193	69.948	1.79e-12	CACACCCCCATTGAGGACGGGGACATGGGCGACATAGGTTTTGGTTGTCTTGACTTTAAGTACCTCTGCGAGA--ACAAGTCAGACATTCCACTGGACATTGTAGATGCCACCTGCAAGTACCCGGACTACATT-AAGATGGGGCAGGAGGCCTCTGGCAACTGCATGTTCTTCTATGCTAGGCGGGAGCAGA
Equus_ferus_caballus_papillomavirus_type_5_complete_genome_JQ031033.1	7519	5398	5561	NODE_66_length_7880_cov_5.870947	182	19	164	67.683	4.75e-07	TTGCTGTTTTGCAGATGGCTTTCTGGACAATGAACAGACAACACCTGTACCTCCCCCCCAATCCCGTCTCTAGGGTTTTGGGGACTGATGAGTATGTGAAGCGGCTGTCGGTGTTCTATCATGGTAACAGCGAGCGTATGCTCATGGTGGGCCACCCCTTCTTT
Equus_ferus_caballus_papillomavirus_type_5_complete_genome_NC_020084.1	7519	5398	5561	NODE_66_length_7880_cov_5.870947	182	19	164	67.683	4.75e-07	TTGCTGTTTTGCAGATGGCTTTCTGGACAATGAACAGACAACACCTGTACCTCCCCCCCAATCCCGTCTCTAGGGTTTTGGGGACTGATGAGTATGTGAAGCGGCTGTCGGTGTTCTATCATGGTAACAGCGAGCGTATGCTCATGGTGGGCCACCCCTTCTTT
Equine_papillomavirus_type_6_complete_genome_JQ965698.1	7551	6207	6347	NODE_66_length_7880_cov_5.870947	7093	6953	141	71.631	1.78e-12	CACGCCAAGTGGATCGCTGGTGTCCACCGACTCTCAAATCTTTAACAGGCCTTACTGGCTGCAGCGTGCACAGGGGCAAAACAATGGGGTCTGCTGGCATGACAAGGTGTATGTTACAGTTTTTGACAACACCCGGGGTAC
Equine_papillomavirus_type_6_complete_genome_NC_020500.1	7551	6207	6347	NODE_66_length_7880_cov_5.870947	7093	6953	141	71.631	1.78e-12	CACGCCAAGTGGATCGCTGGTGTCCACCGACTCTCAAATCTTTAACAGGCCTTACTGGCTGCAGCGTGCACAGGGGCAAAACAATGGGGTCTGCTGGCATGACAAGGTGTATGTTACAGTTTTTGACAACACCCGGGGTAC
Equine_papillomavirus_3_isolate_Haflinger_GU384895.1_complete_genome	7582	6214	6338	NODE_66_length_7880_cov_5.870947	7056	6932	125	77.6	4.48e-20	ATCTTTAACAGGCCTTACTGGCTGCAGCGTGCACAGGGGCAAAACAATGGGGTCTGCTGGCATGACAAGGTGTATGTTACAGTTTTTGACAACACCCGGGGTACCAATTTCAGCATCAGTGTCAA
Equine_papillomavirus_3_complete_genome_NC_017862.1	7582	6214	6338	NODE_66_length_7880_cov_5.870947	7056	6932	125	77.6	4.48e-20	ATCTTTAACAGGCCTTACTGGCTGCAGCGTGCACAGGGGCAAAACAATGGGGTCTGCTGGCATGACAAGGTGTATGTTACAGTTTTTGACAACACCCGGGGTACCAATTTCAGCATCAGTGTCAA
Equine_papillomavirus_3_isolate_Haflinger_GU384895.1_complete_genome	7582	6385	6507	NODE_66_length_7880_cov_5.870947	6873	6751	123	66.667	0.45	AGACATGTGGAGGAGTATGAATTGTCCTTCATCTTTGAGCTGTGCAGTGTCACGTTGTCTCCAGAGGTAATGGCGCACCTGCACACCATGGACCCAGACATTCTTGAGGAATGGGAAATAGGC
Equine_papillomavirus_3_complete_genome_NC_017862.1	7582	6385	6507	NODE_66_length_7880_cov_5.870947	6873	6751	123	66.667	0.45	AGACATGTGGAGGAGTATGAATTGTCCTTCATCTTTGAGCTGTGCAGTGTCACGTTGTCTCCAGAGGTAATGGCGCACCTGCACACCATGGACCCAGACATTCTTGAGGAATGGGAAATAGGC
Equus_ferus_caballus_papillomavirus_type_7_complete_genome_JX035935.1	7619	6000	6121	NODE_66_length_7880_cov_5.870947	7326	7205	122	69.672	5.86e-06	AACAAGTCAGACATTCCACTGGACATTGTAGATGCCACCTGCAAGTACCCGGACTACATTAAGATGGGGCAGGAGGCCTCTGGCAACTGCATGTTCTTCTATGCTAGGCGGGAGCAGATGTA
Equus_ferus_caballus_papillomavirus_type_7_complete_genome_JX035935.1	7619	6442	6562	NODE_66_length_7880_cov_5.870947	6872	6752	122	70.492	2.05e-05	GACATGTGGAGGAGTATGAATTGTCCTTCATCTTTGAGCTGTGCAGTGTCACGTTGTCTCCAGAGGTAATGGCGCACCTGCACACCATGGACCCAGACA-TTCTTGAGGAATGGGAAATAGG
Equus_ferus_caballus_papillomavirus_type_7_complete_genome_NC_020501.1	7619	6000	6121	NODE_66_length_7880_cov_5.870947	7326	7205	122	69.672	5.86e-06	AACAAGTCAGACATTCCACTGGACATTGTAGATGCCACCTGCAAGTACCCGGACTACATTAAGATGGGGCAGGAGGCCTCTGGCAACTGCATGTTCTTCTATGCTAGGCGGGAGCAGATGTA
Equus_ferus_caballus_papillomavirus_type_7_complete_genome_NC_020501.1	7619	6442	6562	NODE_66_length_7880_cov_5.870947	6872	6752	122	70.492	2.05e-05	GACATGTGGAGGAGTATGAATTGTCCTTCATCTTTGAGCTGTGCAGTGTCACGTTGTCTCCAGAGGTAATGGCGCACCTGCACACCATGGACCCAGACA-TTCTTGAGGAATGGGAAATAGG
Equus_caballus_papillomavirus_1_strain_150904_complete_genome_MF288893.1	7613	6144	6258	NODE_66_length_7880_cov_5.870947	7059	6945	115	68.696	0.000869	CAAATCTTTAACAGGCCTTACTGGCTGCAGCGTGCACAGGGGCAAAACAATGGGGTCTGCTGGCATGACAAGGTGTATGTTACAGTTTTTGACAACACCCGGGGTACCAATTTCA
Equus_caballus_papillomavirus_1_isolate_G2_complete_genome_MN164462.1	7611	6141	6255	NODE_66_length_7880_cov_5.870947	7059	6945	115	67.826	0.037	CAAATCTTTAACAGGCCTTACTGGCTGCAGCGTGCACAGGGGCAAAACAATGGGGTCTGCTGGCATGACAAGGTGTATGTTACAGTTTTTGACAACACCCGGGGTACCAATTTCA
Equus_caballus_papillomavirus_type_1_complete_genome_AF498323.1	7610	6141	6255	NODE_66_length_7880_cov_5.870947	7059	6945	115	68.696	0.000869	CAAATCTTTAACAGGCCTTACTGGCTGCAGCGTGCACAGGGGCAAAACAATGGGGTCTGCTGGCATGACAAGGTGTATGTTACAGTTTTTGACAACACCCGGGGTACCAATTTCA
Equus_caballus_papillomavirus_type_1_complete_genome_NC_003748.1	7610	6141	6255	NODE_66_length_7880_cov_5.870947	7059	6945	115	68.696	0.000869	CAAATCTTTAACAGGCCTTACTGGCTGCAGCGTGCACAGGGGCAAAACAATGGGGTCTGCTGGCATGACAAGGTGTATGTTACAGTTTTTGACAACACCCGGGGTACCAATTTCA
Equus_ferus_caballus_papillomavirus_type_7_complete_genome_JX035935.1	7619	6279	6391	NODE_66_length_7880_cov_5.870947	7044	6932	113	77.876	2.33e-17	CCTTACTGGCTGCAGCGTGCACAGGGGCAAAACAATGGGGTCTGCTGGCATGACAAGGTGTATGTTACAGTTTTTGACAACACCCGGGGTACCAATTTCAGCATCAGTGTCAA
Equus_ferus_caballus_papillomavirus_type_7_complete_genome_NC_020501.1	7619	6279	6391	NODE_66_length_7880_cov_5.870947	7044	6932	113	77.876	2.33e-17	CCTTACTGGCTGCAGCGTGCACAGGGGCAAAACAATGGGGTCTGCTGGCATGACAAGGTGTATGTTACAGTTTTTGACAACACCCGGGGTACCAATTTCAGCATCAGTGTCAA
Equus_caballus_papillomavirus_9_strain_complete_genome_SW_MN117918.1	7656	56	149	NODE_66_length_7880_cov_5.870947	6407	6305	106	75.472	9.33e-10	ATGTGTCATG-TCTTTC--TGCACCGCGCCCGCTGGTGGCATGCACGCACCCAATGAGTCCCTTATCCGCAGCGCTGCTGGTGCACGTATAAGAGCGCACCTGGTG
Equus_caballus_papillomavirus_8_strain_NCSU_complete_genome_KU963288.1	8155	7013	7115	NODE_66_length_7880_cov_5.870947	7055	6953	103	73.786	3.46e-09	TCTTTAACAGGCCTTACTGGCTGCAGCGTGCACAGGGGCAAAACAATGGGGTCTGCTGGCATGACAAGGTGTATGTTACAGTTTTTGACAACACCCGGGGTAC
Equus_caballus_papillomavirus_8_strain_NCSU_complete_genome_NC_031756.1	8155	7013	7115	NODE_66_length_7880_cov_5.870947	7055	6953	103	73.786	3.46e-09	TCTTTAACAGGCCTTACTGGCTGCAGCGTGCACAGGGGCAAAACAATGGGGTCTGCTGGCATGACAAGGTGTATGTTACAGTTTTTGACAACACCCGGGGTAC
Equus_caballus_papillomavirus_8_strain_NCSU_complete_genome_KU963288.1	8155	2814	2914	NODE_66_length_7880_cov_5.870947	2817	2717	101	69.307	0.011	CTTTGCAGGCGAGCCCTGGAGTATGACAGATGTCAGCCGCGAAATGTACGCGGCCCCGCCTTGCGATACGTTCAAAAAGGGAGGGTACGTTGTCGAGGTGC
Equus_caballus_papillomavirus_8_strain_NCSU_complete_genome_NC_031756.1	8155	2814	2914	NODE_66_length_7880_cov_5.870947	2817	2717	101	69.307	0.011	CTTTGCAGGCGAGCCCTGGAGTATGACAGATGTCAGCCGCGAAATGTACGCGGCCCCGCCTTGCGATACGTTCAAAAAGGGAGGGTACGTTGTCGAGGTGC
Equus_caballus_papillomavirus_8_strain_NCSU_complete_genome_KU963288.1	8155	2496	2588	NODE_66_length_7880_cov_5.870947	3135	3043	94	84.043	2.04e-18	TCTCTTTTTAAAAGGTTGTGGCAACGCTTAGAATTGAGTGACCAGGAGGACGAGGGAGACGATGGAGAACCT-ACACAGGGCTTTAGATGCACT
Equus_caballus_papillomavirus_8_strain_NCSU_complete_genome_NC_031756.1	8155	2496	2588	NODE_66_length_7880_cov_5.870947	3135	3043	94	84.043	2.04e-18	TCTCTTTTTAAAAGGTTGTGGCAACGCTTAGAATTGAGTGACCAGGAGGACGAGGGAGACGATGGAGAACCT-ACACAGGGCTTTAGATGCACT
Equus_caballus_papillomavirus_8_strain_NCSU_complete_genome_KU963288.1	8155	6532	6608	NODE_66_length_7880_cov_5.870947	7533	7457	79	74.684	0.011	AATATGGGCTTCGATGTGAAGCAGTCTCAG--CTTTTGATGGTGGGCTGCAAGCCGGCCATCGGCGAGCACTGGACCAA
Equus_caballus_papillomavirus_8_strain_NCSU_complete_genome_NC_031756.1	8155	6532	6608	NODE_66_length_7880_cov_5.870947	7533	7457	79	74.684	0.011	AATATGGGCTTCGATGTGAAGCAGTCTCAG--CTTTTGATGGTGGGCTGCAAGCCGGCCATCGGCGAGCACTGGACCAA
Equus_ferus_caballus_papillomavirus_type_5_complete_genome_JQ031033.1	7519	4084	4158	NODE_66_length_7880_cov_5.870947	1556	1482	75	86.667	2.3e-17	GGACACTGTGGCTGACCGCATTCTAAAATGGCTCAGCTCCTTCCTTTACCTTGGGAACCTGGGTATTGGCACTGG
Equus_ferus_caballus_papillomavirus_type_5_complete_genome_NC_020084.1	7519	4084	4158	NODE_66_length_7880_cov_5.870947	1556	1482	75	86.667	2.3e-17	GGACACTGTGGCTGACCGCATTCTAAAATGGCTCAGCTCCTTCCTTTACCTTGGGAACCTGGGTATTGGCACTGG
Equus_ferus_caballus_papillomavirus_type_7_complete_genome_JX035935.1	7619	2457	2529	NODE_66_length_7880_cov_5.870947	3142	3069	74	78.378	1.38e-07	TTGGAAATCTCTTTTTAAAAGGTTGTGGCAACGCTTAGAATTGAGTGACCAGGAGGACGAGGGAGACGATGGAG
Equus_ferus_caballus_papillomavirus_type_7_complete_genome_NC_020501.1	7619	2457	2529	NODE_66_length_7880_cov_5.870947	3142	3069	74	78.378	1.38e-07	TTGGAAATCTCTTTTTAAAAGGTTGTGGCAACGCTTAGAATTGAGTGACCAGGAGGACGAGGGAGACGATGGAG
Equus_ferus_caballus_papillomavirus_type_5_complete_genome_JQ031033.1	7519	3362	3432	NODE_66_length_7880_cov_5.870947	2236	2166	72	75	0.01	GAGGCCCGGGGCTATTGGGA-ACCCCCCCTTCCCCCGCCCTTCTGCAGGGCGAGGATGCGCCGGACTCATCT
Equus_ferus_caballus_papillomavirus_type_5_complete_genome_NC_020084.1	7519	3362	3432	NODE_66_length_7880_cov_5.870947	2236	2166	72	75	0.01	GAGGCCCGGGGCTATTGGGA-ACCCCCCCTTCCCCCGCCCTTCTGCAGGGCGAGGATGCGCCGGACTCATCT
Equus_caballus_papillomavirus_8_strain_NCSU_complete_genome_KU963288.1	8155	6283	6350	NODE_66_length_7880_cov_5.870947	7791	7724	68	77.941	1.79e-06	GTTCCCAAGGTGTCCTCTAATCAGTACAGGGTGTTTGAGGTAGTTCTCCCAAATCCCAACAAATTTGC
Equus_caballus_papillomavirus_8_strain_NCSU_complete_genome_NC_031756.1	8155	6283	6350	NODE_66_length_7880_cov_5.870947	7791	7724	68	77.941	1.79e-06	GTTCCCAAGGTGTCCTCTAATCAGTACAGGGTGTTTGAGGTAGTTCTCCCAAATCCCAACAAATTTGC
Equine_papillomavirus_3_isolate_Haflinger_GU384895.1_complete_genome	7582	4648	4713	NODE_5020_length_406_cov_1.319149	265	200	66	77.273	2.04e-05	GGGAGGAGGCAAGTGACAGTTTGGTGTTTGAGCCTGTCGTTGCCTCCCCCCGGGCAGCCCCGGATG
Equine_papillomavirus_3_complete_genome_NC_017862.1	7582	4648	4713	NODE_5020_length_406_cov_1.319149	265	200	66	77.273	2.04e-05	GGGAGGAGGCAAGTGACAGTTTGGTGTTTGAGCCTGTCGTTGCCTCCCCCCGGGCAGCCCCGGATG
Equus_caballus_papillomavirus_8_strain_NCSU_complete_genome_KU963288.1	8155	3821	3886	NODE_2876_length_515_cov_0.559361	92	27	66	75.758	0.000266	CCGAGCCGGAGCCCAAGCCTCAGCCCCAGCCAGTGCCCGAGCCTGTGCCTCAGCCGGTGTCAGAAC
Equus_caballus_papillomavirus_8_strain_NCSU_complete_genome_NC_031756.1	8155	3821	3886	NODE_2876_length_515_cov_0.559361	92	27	66	75.758	0.000266	CCGAGCCGGAGCCCAAGCCTCAGCCCCAGCCAGTGCCCGAGCCTGTGCCTCAGCCGGTGTCAGAAC
Equine_papillomavirus_type_6_complete_genome_JQ965698.1	7551	4660	4723	NODE_5020_length_406_cov_1.319149	265	202	64	78.125	5.81e-06	GGGAGGAGGCAAGTGACAGTTTGGTGTTTGAGCCTGTCGTTGCCTCCCCCCGGGCAGCCCCGGA
Equine_papillomavirus_type_6_complete_genome_NC_020500.1	7551	4660	4723	NODE_5020_length_406_cov_1.319149	265	202	64	78.125	5.81e-06	GGGAGGAGGCAAGTGACAGTTTGGTGTTTGAGCCTGTCGTTGCCTCCCCCCGGGCAGCCCCGGA
Equus_caballus_papillomavirus_8_strain_NCSU_complete_genome_KU963288.1	8155	3796	3857	NODE_2876_length_515_cov_0.559361	99	38	62	75.806	0.003	CCCGGCTCCGAGCCGGAGCCCAAGCCTCAGCCCCAGCCAGTGCCCGAGCCTGTGCCTCAGCC
Equus_caballus_papillomavirus_8_strain_NCSU_complete_genome_NC_031756.1	8155	3796	3857	NODE_2876_length_515_cov_0.559361	99	38	62	75.806	0.003	CCCGGCTCCGAGCCGGAGCCCAAGCCTCAGCCCCAGCCAGTGCCCGAGCCTGTGCCTCAGCC
Equus_caballus_papillomavirus_8_strain_NCSU_complete_genome_KU963288.1	8155	3822	3879	NODE_499_length_1540_cov_6.067669	1161	1220	60	81.667	2.18e-05	CCCGCCCGCACCCCCAGCCCCGGCCCCAGCCCCAGCCCCCGCCCCCACCGGCGGCCCCAG
Equus_caballus_papillomavirus_8_strain_NCSU_complete_genome_NC_031756.1	8155	3822	3879	NODE_499_length_1540_cov_6.067669	1161	1220	60	81.667	2.18e-05	CCCGCCCGCACCCCCAGCCCCGGCCCCAGCCCCAGCCCCCGCCCCCACCGGCGGCCCCAG
Equus_caballus_papillomavirus_8_strain_NCSU_complete_genome_KU963288.1	8155	3786	3838	NODE_5469_length_392_cov_0.942857	75	17	59	76.271	0.039	CGGTGGCGGCGGCCCCGGGCAGCCTCAGCCTGAGCCTCAGCCCCGGCGCCAGCGGCAGC
Equus_caballus_papillomavirus_8_strain_NCSU_complete_genome_NC_031756.1	8155	3786	3838	NODE_5469_length_392_cov_0.942857	75	17	59	76.271	0.039	CGGTGGCGGCGGCCCCGGGCAGCCTCAGCCTGAGCCTCAGCCCCGGCGCCAGCGGCAGC
Equus_caballus_papillomavirus_8_strain_NCSU_complete_genome_KU963288.1	8155	3823	3876	NODE_23918_length_237_cov_0.775000	117	60	58	77.586	0.039	CAGCGACAGCCCGAGGAGCGCCGCCCCAGCCGGCCCGCCGGAGCCCCAGCCCCGGCCC
Equus_caballus_papillomavirus_8_strain_NCSU_complete_genome_NC_031756.1	8155	3823	3876	NODE_23918_length_237_cov_0.775000	117	60	58	77.586	0.039	CAGCGACAGCCCGAGGAGCGCCGCCCCAGCCGGCCCGCCGGAGCCCCAGCCCCGGCCC
Equus_caballus_papillomavirus_1_strain_150904_complete_genome_MF288893.1	7613	855	907	NODE_66_length_7880_cov_5.870947	4734	4679	56	76.786	0.037	CAGGGAAATTCCCTAGCACTGTTCCAGCAGCAGCAGGCGAGGGAAACGGAGGAGCA
Equus_caballus_papillomavirus_1_isolate_G2_complete_genome_MN164462.1	7611	855	907	NODE_66_length_7880_cov_5.870947	4734	4679	56	75	0.45	CAGGGAAATTCCCTAGCACTGTTCCAGCAGCAGCAGGCGAGGGAAACGGAGGAGCA
Equus_caballus_papillomavirus_type_1_complete_genome_AF498323.1	7610	855	907	NODE_66_length_7880_cov_5.870947	4734	4679	56	76.786	0.037	CAGGGAAATTCCCTAGCACTGTTCCAGCAGCAGCAGGCGAGGGAAACGGAGGAGCA
Equus_caballus_papillomavirus_type_1_complete_genome_NC_003748.1	7610	855	907	NODE_66_length_7880_cov_5.870947	4734	4679	56	76.786	0.037	CAGGGAAATTCCCTAGCACTGTTCCAGCAGCAGCAGGCGAGGGAAACGGAGGAGCA
Equine_papillomavirus_type_6_complete_genome_JQ965698.1	7551	290	342	NODE_5_length_20649_cov_3.377892	979	1030	54	79.63	0.45	AAGAATTTCAGGGCAA-CCCATTTGCACGATT-AAGATACACTGCAAATATTGC
Equine_papillomavirus_type_6_complete_genome_NC_020500.1	7551	290	342	NODE_5_length_20649_cov_3.377892	979	1030	54	79.63	0.45	AAGAATTTCAGGGCAA-CCCATTTGCACGATT-AAGATACACTGCAAATATTGC
Equine_papillomavirus_type_6_complete_genome_JQ965698.1	7551	1683	1735	NODE_66_length_7880_cov_5.870947	3918	3866	53	75.472	0.45	GAGGAGGCGATGAAATTTGAGTTTTCAGACATGGTGCAGTGGGCCTATGACAA
Equine_papillomavirus_type_6_complete_genome_NC_020500.1	7551	1683	1735	NODE_66_length_7880_cov_5.870947	3918	3866	53	75.472	0.45	GAGGAGGCGATGAAATTTGAGTTTTCAGACATGGTGCAGTGGGCCTATGACAA
Equus_caballus_papillomavirus_8_strain_NCSU_complete_genome_KU963288.1	8155	3817	3869	NODE_2876_length_515_cov_0.559361	90	38	53	79.245	0.001	GAGCCGGAGCCCAAGCCTCAGCCCCAGCCAGTGCCCGAGCCTGTGCCTCAGCC
Equus_caballus_papillomavirus_8_strain_NCSU_complete_genome_NC_031756.1	8155	3817	3869	NODE_2876_length_515_cov_0.559361	90	38	53	79.245	0.001	GAGCCGGAGCCCAAGCCTCAGCCCCAGCCAGTGCCCGAGCCTGTGCCTCAGCC
Equus_ferus_caballus_papillomavirus_type_7_complete_genome_JX035935.1	7619	4712	4763	NODE_5020_length_406_cov_1.319149	251	200	52	80.769	7.14e-05	GACAGTTTGGTGTTTGAGCCTGTCGTTGCCTCCCCCCGGGCAGCCCCGGATG
Equus_ferus_caballus_papillomavirus_type_7_complete_genome_NC_020501.1	7619	4712	4763	NODE_5020_length_406_cov_1.319149	251	200	52	80.769	7.14e-05	GACAGTTTGGTGTTTGAGCCTGTCGTTGCCTCCCCCCGGGCAGCCCCGGATG
Equus_caballus_papillomavirus_8_strain_NCSU_complete_genome_KU963288.1	8155	3820	3868	NODE_499_length_1540_cov_6.067669	1172	1221	50	86	1.79e-06	CCCCAGCCCCGGCCCCAGCCCCAGCCCCCGCCCCCACCGGCGGCCCCAGC
Equus_caballus_papillomavirus_8_strain_NCSU_complete_genome_NC_031756.1	8155	3820	3868	NODE_499_length_1540_cov_6.067669	1172	1221	50	86	1.79e-06	CCCCAGCCCCGGCCCCAGCCCCAGCCCCCGCCCCCACCGGCGGCCCCAGC
Equus_caballus_papillomavirus_1_strain_150904_complete_genome_MF288893.1	7613	5318	5364	NODE_66_length_7880_cov_5.870947	67	21	47	80.851	0.003	CTATCATGGTAACAGCGAGCGTATGCTCATGGTGGGCCACCCCTTCT
Equus_caballus_papillomavirus_1_isolate_G2_complete_genome_MN164462.1	7611	5315	5361	NODE_66_length_7880_cov_5.870947	67	21	47	80.851	0.003	CTATCATGGTAACAGCGAGCGTATGCTCATGGTGGGCCACCCCTTCT
Equus_caballus_papillomavirus_type_1_complete_genome_AF498323.1	7610	5315	5361	NODE_66_length_7880_cov_5.870947	67	21	47	80.851	0.003	CTATCATGGTAACAGCGAGCGTATGCTCATGGTGGGCCACCCCTTCT
Equus_caballus_papillomavirus_type_1_complete_genome_NC_003748.1	7610	5315	5361	NODE_66_length_7880_cov_5.870947	67	21	47	80.851	0.003	CTATCATGGTAACAGCGAGCGTATGCTCATGGTGGGCCACCCCTTCT
Equus_caballus_papillomavirus_9_strain_complete_genome_SW_MN117918.1	7656	5339	5385	NODE_847_length_992_cov_6.817391	657	699	47	80.851	0.13	GCGCACG-GCAGGCCCAGGGCGCG---GCGCGCAGCCGGGCCTCGGC
Equus_ferus_caballus_papillomavirus_type_4_complete_genome_NC_020085.1	7554	5398	5436	NODE_66_length_7880_cov_5.870947	199	155	45	77.778	0.45	CGCAAACGGCGGTACAATTGCTGTTTTGCAGATGGCTTTCTGGAC
Equus_ferus_caballus_papillomavirus_type_4_complete_genome_JQ031032.1	7554	5398	5436	NODE_66_length_7880_cov_5.870947	199	155	45	77.778	0.45	CGCAAACGGCGGTACAATTGCTGTTTTGCAGATGGCTTTCTGGAC
Equus_caballus_papillomavirus_8_strain_NCSU_complete_genome_KU963288.1	8155	3834	3875	NODE_10458_length_302_cov_0.826667	259	215	45	82.222	0.14	CCAGTCCCCAGCCCCAGCCTGCCCGTCCGTGCCCCAGGCCCATCC
Equus_caballus_papillomavirus_8_strain_NCSU_complete_genome_NC_031756.1	8155	3834	3875	NODE_10458_length_302_cov_0.826667	259	215	45	82.222	0.14	CCAGTCCCCAGCCCCAGCCTGCCCGTCCGTGCCCCAGGCCCATCC
Equine_papillomavirus_3_isolate_Haflinger_GU384895.1_complete_genome	7582	3268	3309	NODE_4579_length_422_cov_0.646377	79	122	44	79.545	0.45	AGAGGTTCTGCTGGAGGCAGCCCACATTGAAGGGCGTGCAGTCC
Equine_papillomavirus_3_complete_genome_NC_017862.1	7582	3268	3309	NODE_4579_length_422_cov_0.646377	79	122	44	79.545	0.45	AGAGGTTCTGCTGGAGGCAGCCCACATTGAAGGGCGTGCAGTCC
Equus_ferus_caballus_papillomavirus_type_5_complete_genome_JQ031033.1	7519	2879	2919	NODE_66_length_7880_cov_5.870947	2695	2655	42	83.333	0.44	ACGCCATGTGGTATACAGGCTGGCAGC-ATGTCTACTACCAG
Equus_ferus_caballus_papillomavirus_type_5_complete_genome_NC_020084.1	7519	2879	2919	NODE_66_length_7880_cov_5.870947	2695	2655	42	83.333	0.44	ACGCCATGTGGTATACAGGCTGGCAGC-ATGTCTACTACCAG
Equus_caballus_papillomavirus_2_isolate_XJ-ks1391_complete_genome_MW410986.1	7802	5140	5178	NODE_11416_length_290_cov_1.164319	257	219	39	82.051	0.13	GCAGGGAGCCTGGGTGTGGGTCAGCAGGGAAGGTAAGCG
Equine_papillomavirus_2_complete_genome_EU503122.1	7802	5140	5178	NODE_11416_length_290_cov_1.164319	257	219	39	82.051	0.13	GCAGGGAGCCTGGGTGTGGGTCAGCAGGGAAGGTAAGCG
Equine_papillomavirus_2_complete_genome_NC_012123.1	7802	5140	5178	NODE_11416_length_290_cov_1.164319	257	219	39	82.051	0.13	GCAGGGAGCCTGGGTGTGGGTCAGCAGGGAAGGTAAGCG
Equus_caballus_papillomavirus_8_strain_NCSU_complete_genome_KU963288.1	8155	3820	3858	NODE_499_length_1540_cov_6.067669	1166	1204	39	89.744	6.26e-06	CCGCACCCCCAGCCCCGGCCCCAGCCCCAGCCCCCGCCC
Equus_caballus_papillomavirus_8_strain_NCSU_complete_genome_KU963288.1	8155	3842	3880	NODE_15723_length_256_cov_1.189944	184	220	39	82.051	0.48	AGCCCCCGCCGC--CCCGGGCGTCAGCCCCAGCCCCAGT
Equus_caballus_papillomavirus_8_strain_NCSU_complete_genome_NC_031756.1	8155	3820	3858	NODE_499_length_1540_cov_6.067669	1166	1204	39	89.744	6.26e-06	CCGCACCCCCAGCCCCGGCCCCAGCCCCAGCCCCCGCCC
Equus_caballus_papillomavirus_8_strain_NCSU_complete_genome_NC_031756.1	8155	3842	3880	NODE_15723_length_256_cov_1.189944	184	220	39	82.051	0.48	AGCCCCCGCCGC--CCCGGGCGTCAGCCCCAGCCCCAGT
Equus_caballus_papillomavirus_8_strain_NCSU_complete_genome_KU963288.1	8155	3819	3853	NODE_485_length_1585_cov_25.343501	1422	1456	35	82.857	0.48	GCCGCAGCCCCCACCCCGCCCCCCGCCCCAGCCCC
Equus_caballus_papillomavirus_8_strain_NCSU_complete_genome_NC_031756.1	8155	3819	3853	NODE_485_length_1585_cov_25.343501	1422	1456	35	82.857	0.48	GCCGCAGCCCCCACCCCGCCCCCCGCCCCAGCCCC
Equus_caballus_papillomavirus_2_isolate_XJ-ks1391_complete_genome_MW410986.1	7802	1441	1474	NODE_66_length_7880_cov_5.870947	4367	4400	34	88.235	0.003	CTGGCACGCAGCACGTCCAAGTGCTGCGTGCCAG
Equine_papillomavirus_2_isolate_Zurich_2009_HM461973.1_complete_genome	7803	1442	1475	NODE_66_length_7880_cov_5.870947	4367	4400	34	88.235	0.003	CTGGCACGCAGCACGTCCAAGTGCTGCGTGCCAG
Equine_papillomavirus_2_complete_genome_EU503122.1	7802	1441	1474	NODE_66_length_7880_cov_5.870947	4367	4400	34	88.235	0.003	CTGGCACGCAGCACGTCCAAGTGCTGCGTGCCAG
Equine_papillomavirus_2_complete_genome_NC_012123.1	7802	1441	1474	NODE_66_length_7880_cov_5.870947	4367	4400	34	88.235	0.003	CTGGCACGCAGCACGTCCAAGTGCTGCGTGCCAG
Equus_ferus_caballus_papillomavirus_type_7_complete_genome_JX035935.1	7619	23	55	NODE_12942_length_273_cov_1.010204	43	11	33	84.848	0.45	CTCAGCCAAAGGATGACCAGCTGGAGCTGGAGG
Equus_ferus_caballus_papillomavirus_type_7_complete_genome_NC_020501.1	7619	23	55	NODE_12942_length_273_cov_1.010204	43	11	33	84.848	0.45	CTCAGCCAAAGGATGACCAGCTGGAGCTGGAGG
Equus_caballus_papillomavirus_9_strain_complete_genome_SW_MN117918.1	7656	7439	7471	NODE_25039_length_234_cov_1.579618	67	99	33	84.848	0.45	ACCGTCCTCGACACCCCCTCCTCGAGCCTTCTA
Equus_ferus_caballus_papillomavirus_type_7_complete_genome_JX035935.1	7619	431	459	NODE_4800_length_413_cov_1.982143	10	39	30	90	0.45	ACCCTGACCGCAGAGCTGATTAAGGAAGAG
Equus_ferus_caballus_papillomavirus_type_7_complete_genome_NC_020501.1	7619	431	459	NODE_4800_length_413_cov_1.982143	10	39	30	90	0.45	ACCCTGACCGCAGAGCTGATTAAGGAAGAG
Equus_caballus_papillomavirus_8_strain_NCSU_complete_genome_KU963288.1	8155	3818	3847	NODE_499_length_1540_cov_6.067669	1176	1205	30	93.333	0.001	AGCCCCGGCCCCAGCCCCAGCCCCCGCCCC
Equus_caballus_papillomavirus_8_strain_NCSU_complete_genome_KU963288.1	8155	3812	3841	NODE_23702_length_237_cov_2.025000	74	45	30	90	0.039	AGCCTGAGCCCTAGCCCCTGCCCCACCCCC
Equus_caballus_papillomavirus_8_strain_NCSU_complete_genome_NC_031756.1	8155	3818	3847	NODE_499_length_1540_cov_6.067669	1176	1205	30	93.333	0.001	AGCCCCGGCCCCAGCCCCAGCCCCCGCCCC
Equus_caballus_papillomavirus_8_strain_NCSU_complete_genome_NC_031756.1	8155	3812	3841	NODE_23702_length_237_cov_2.025000	74	45	30	90	0.039	AGCCTGAGCCCTAGCCCCTGCCCCACCCCC
Equus_caballus_papillomavirus_1_strain_150904_complete_genome_MF288893.1	7613	3809	3836	NODE_5694_length_385_cov_1.808442	67	40	28	89.286	0.45	GGGCGAGGCGGGCGGAGAGAAGGCAGAG
Equus_caballus_papillomavirus_1_isolate_G2_complete_genome_MN164462.1	7611	3809	3836	NODE_5694_length_385_cov_1.808442	67	40	28	89.286	0.45	GGGCGAGGCGGGCGGAGAGAAGGCAGAG
Equus_caballus_papillomavirus_type_1_complete_genome_AF498323.1	7610	3809	3836	NODE_5694_length_385_cov_1.808442	67	40	28	89.286	0.45	GGGCGAGGCGGGCGGAGAGAAGGCAGAG
Equus_caballus_papillomavirus_type_1_complete_genome_NC_003748.1	7610	3809	3836	NODE_5694_length_385_cov_1.808442	67	40	28	89.286	0.45	GGGCGAGGCGGGCGGAGAGAAGGCAGAG
Equus_caballus_papillomavirus_8_strain_NCSU_complete_genome_KU963288.1	8155	3805	3832	NODE_3317_length_483_cov_1.066502	152	179	28	89.286	0.48	GAGCCTGAGCCTGAGCCTGAGCCTCAGC
Equus_caballus_papillomavirus_8_strain_NCSU_complete_genome_NC_031756.1	8155	3805	3832	NODE_3317_length_483_cov_1.066502	152	179	28	89.286	0.48	GAGCCTGAGCCTGAGCCTGAGCCTCAGC
Equus_ferus_caballus_papillomavirus_type_4_complete_genome_NC_020085.1	7554	2632	2657	NODE_12864_length_274_cov_0.944162	218	192	27	92.593	0.45	GGCCACATGCCCTTTCCCCAGCTTGGT
Equus_ferus_caballus_papillomavirus_type_4_complete_genome_JQ031032.1	7554	2632	2657	NODE_12864_length_274_cov_0.944162	218	192	27	92.593	0.45	GGCCACATGCCCTTTCCCCAGCTTGGT
Equus_caballus_papillomavirus_8_strain_NCSU_complete_genome_KU963288.1	8155	3815	3841	NODE_8443_length_330_cov_1.217391	126	152	27	92.593	0.039	CTGACCCCCAGCCCCAGCCCCAGCGCC
Equus_caballus_papillomavirus_8_strain_NCSU_complete_genome_NC_031756.1	8155	3815	3841	NODE_8443_length_330_cov_1.217391	126	152	27	92.593	0.039	CTGACCCCCAGCCCCAGCCCCAGCGCC
Equus_caballus_papillomavirus_1_strain_150904_complete_genome_MF288893.1	7613	3380	3405	NODE_7674_length_343_cov_0.928571	313	338	26	92.308	0.13	CTCCAGGAATTGATGCAACAACTGGA
Equus_caballus_papillomavirus_1_isolate_G2_complete_genome_MN164462.1	7611	3380	3405	NODE_7674_length_343_cov_0.928571	313	338	26	92.308	0.13	CTCCAGGAATTGATGCAACAACTGGA
Equus_caballus_papillomavirus_type_1_complete_genome_AF498323.1	7610	3380	3405	NODE_7674_length_343_cov_0.928571	313	338	26	92.308	0.13	CTCCAGGAATTGATGCAACAACTGGA
Equus_caballus_papillomavirus_type_1_complete_genome_NC_003748.1	7610	3380	3405	NODE_7674_length_343_cov_0.928571	313	338	26	92.308	0.13	CTCCAGGAATTGATGCAACAACTGGA
Equus_caballus_papillomavirus_1_strain_150904_complete_genome_MF288893.1	7613	5193	5217	NODE_20522_length_245_cov_0.738095	71	47	25	92	0.45	CTAATTTTTTTCTTTAAGATCATGG
Equus_caballus_papillomavirus_1_strain_150904_complete_genome_MF288893.1	7613	3403	3427	NODE_7387_length_348_cov_0.874539	225	201	25	92	0.45	GGGCGGGGGAGCGACCCCTCGCCCG
Equus_caballus_papillomavirus_1_isolate_G2_complete_genome_MN164462.1	7611	5190	5214	NODE_20522_length_245_cov_0.738095	71	47	25	92	0.45	CTAATTTTTTTCTTTAAGATCATGG
Equus_caballus_papillomavirus_type_1_complete_genome_AF498323.1	7610	765	789	NODE_25098_length_234_cov_1.184713	166	190	25	92	0.45	CAGCAAGAGGCAGACTGCTGTGATA
Equus_caballus_papillomavirus_type_1_complete_genome_AF498323.1	7610	5190	5214	NODE_20522_length_245_cov_0.738095	71	47	25	92	0.45	CTAATTTTTTTCTTTAAGATCATGG
Equus_caballus_papillomavirus_type_1_complete_genome_NC_003748.1	7610	765	789	NODE_25098_length_234_cov_1.184713	166	190	25	92	0.45	CAGCAAGAGGCAGACTGCTGTGATA
Equus_caballus_papillomavirus_type_1_complete_genome_NC_003748.1	7610	5190	5214	NODE_20522_length_245_cov_0.738095	71	47	25	92	0.45	CTAATTTTTTTCTTTAAGATCATGG
Equus_caballus_papillomavirus_2_isolate_XJ-ks1391_complete_genome_MW410986.1	7802	4225	4249	NODE_17323_length_253_cov_0.704545	128	104	25	96	0.038	GTACCGGGCCTGCAAGATGAGGGCG
Equus_caballus_papillomavirus_2_isolate_XJ-ks1391_complete_genome_MW410986.1	7802	870	894	NODE_7754_length_341_cov_1.420455	304	328	25	92	0.46	CGGATCCTGCAGCAGCCGCTCCTGG
Equine_papillomavirus_2_isolate_Zurich_2009_HM461973.1_complete_genome	7803	4226	4250	NODE_17323_length_253_cov_0.704545	128	104	25	92	0.46	GTACCGGGCCTGCAAGATGAGGGCG
Equine_papillomavirus_2_isolate_Zurich_2009_HM461973.1_complete_genome	7803	870	894	NODE_7754_length_341_cov_1.420455	304	328	25	92	0.46	CGGATCCTGCAGCAGCCGCTCCTGG
Equine_papillomavirus_2_complete_genome_EU503122.1	7802	4225	4249	NODE_17323_length_253_cov_0.704545	128	104	25	96	0.038	GTACCGGGCCTGCAAGATGAGGGCG
Equine_papillomavirus_2_complete_genome_EU503122.1	7802	870	894	NODE_7754_length_341_cov_1.420455	304	328	25	92	0.46	CGGATCCTGCAGCAGCCGCTCCTGG
Equine_papillomavirus_2_complete_genome_NC_012123.1	7802	4225	4249	NODE_17323_length_253_cov_0.704545	128	104	25	96	0.038	GTACCGGGCCTGCAAGATGAGGGCG
Equine_papillomavirus_2_complete_genome_NC_012123.1	7802	870	894	NODE_7754_length_341_cov_1.420455	304	328	25	92	0.46	CGGATCCTGCAGCAGCCGCTCCTGG
Equus_ferus_caballus_papillomavirus_type_5_complete_genome_JQ031033.1	7519	4214	4238	NODE_6119_length_374_cov_1.067340	115	91	25	92	0.44	GCTGCGGAGGGAGGGGGGGTGAGTG
Equus_ferus_caballus_papillomavirus_type_5_complete_genome_NC_020084.1	7519	4214	4238	NODE_6119_length_374_cov_1.067340	115	91	25	92	0.44	GCTGCGGAGGGAGGGGGGGTGAGTG
Equus_ferus_caballus_papillomavirus_type_5_complete_genome_JQ031033.1	7519	223	245	NODE_21640_length_242_cov_1.321212	125	147	23	95.652	0.44	CTGCTGCGCTACAGCGGGGACGA
Equus_ferus_caballus_papillomavirus_type_5_complete_genome_NC_020084.1	7519	223	245	NODE_21640_length_242_cov_1.321212	125	147	23	95.652	0.44	CTGCTGCGCTACAGCGGGGACGA
Equus_caballus_papillomavirus_8_strain_NCSU_complete_genome_KU963288.1	8155	3834	3856	NODE_21654_length_242_cov_1.127273	150	128	23	95.652	0.48	CCAGCCCCATCCCCAGCCCCAGC
Equus_caballus_papillomavirus_8_strain_NCSU_complete_genome_KU963288.1	8155	3828	3850	NODE_21654_length_242_cov_1.127273	150	128	23	95.652	0.48	CCAGCCCCATCCCCAGCCCCAGC
Equus_caballus_papillomavirus_8_strain_NCSU_complete_genome_KU963288.1	8155	3822	3844	NODE_21654_length_242_cov_1.127273	150	128	23	95.652	0.48	CCAGCCCCATCCCCAGCCCCAGC
Equus_caballus_papillomavirus_8_strain_NCSU_complete_genome_NC_031756.1	8155	3834	3856	NODE_21654_length_242_cov_1.127273	150	128	23	95.652	0.48	CCAGCCCCATCCCCAGCCCCAGC
Equus_caballus_papillomavirus_8_strain_NCSU_complete_genome_NC_031756.1	8155	3828	3850	NODE_21654_length_242_cov_1.127273	150	128	23	95.652	0.48	CCAGCCCCATCCCCAGCCCCAGC
Equus_caballus_papillomavirus_8_strain_NCSU_complete_genome_NC_031756.1	8155	3822	3844	NODE_21654_length_242_cov_1.127273	150	128	23	95.652	0.48	CCAGCCCCATCCCCAGCCCCAGC
Equus_caballus_papillomavirus_1_strain_150904_complete_genome_MF288893.1	7613	4697	4717	NODE_7774_length_341_cov_0.939394	156	176	21	100	0.13	CCAGAGGGGTTTCTGTGTCCC
Equus_caballus_papillomavirus_1_isolate_G2_complete_genome_MN164462.1	7611	4697	4717	NODE_7774_length_341_cov_0.939394	156	176	21	100	0.13	CCAGAGGGGTTTCTGTGTCCC
Equus_caballus_papillomavirus_type_1_complete_genome_AF498323.1	7610	4697	4717	NODE_7774_length_341_cov_0.939394	156	176	21	100	0.13	CCAGAGGGGTTTCTGTGTCCC
Equus_caballus_papillomavirus_type_1_complete_genome_NC_003748.1	7610	4697	4717	NODE_7774_length_341_cov_0.939394	156	176	21	100	0.13	CCAGAGGGGTTTCTGTGTCCC
Equus_ferus_caballus_papillomavirus_type_4_complete_genome_NC_020085.1	7554	460	479	NODE_1610_length_671_cov_1.451178	35	54	20	100	0.45	CGACGACGAGCACCCCGTCC
Equus_ferus_caballus_papillomavirus_type_4_complete_genome_JQ031032.1	7554	460	479	NODE_1610_length_671_cov_1.451178	35	54	20	100	0.45	CGACGACGAGCACCCCGTCC

## Sheet: ID2396_5-5
qseq ID	qlen	qstart	qend	subject ID	sstart	send	len	pident	evalue	seq
Equus_caballus_papillomavirus_2_isolate_XJ-ks1391_complete_genome_MW410986.1	7802	1	4375	NODE_10_length_5103_cov_2.636689	4373	1	4376	99.2	0	CGAGATGCCAAGCAGGCCAGTGCCCGCCAAGAGCTTTGGCGCTCTCTTCTGGTTACTTTGGCGCTGCACCCAGCCAATCTGCAGACTGGGTCTTTGTGAGTCAGCGAATCCTCTGCGGTGCACAGAGCCTTTTTCTAGAGAAGATTGTTGTGGACCACAATCATTAAGATATGCAGGAGGCCCCTGCATCGGAGACGTTCCGCGGAGCTCCAGAGGGAGAGTGAAGACTGCTGGCCACATGTCGATCGTTGGCCTTCTTTGCACCTTTTGTGGAAAGCCGTGTGGCTATGCTGATGACATTTGGTGGAACACAGCAGACCTGAACCTGGTTATGAGAGACGGCAAGCGCAAGGCCAGCTGCCAGACCTGCATGAGAGCAGCCTGCAGGCTTGAGCGCCA…
Equine_papillomavirus_2_complete_genome_EU503122.1	7802	1	4375	NODE_10_length_5103_cov_2.636689	4373	1	4376	99.246	0	CGAGATGCCAAGCAGGCCAGTGCCCGCCAAGAGCTTTGGCGCTCTCTTCTGGTTACTTTGGCGCTGCACCCAGCCAATCTGCAGACTGGGTCTTTGTGAGTCAGCGAATCCTCTGCGGTGCACAGAGCCTTTTTCTAGAGAAGATTGTTGTGGACCACAATCATTAAGATATGCAGGAGGCCCCTGCATCGGAGACGTTCCGCGGAGCTCCAGAGGGAGAGTGAAGACTGCTGGCCACATGTCGATCGTTGGCCTTCTTTGCACCTTTTGTGGAAAGCCGTGTGGCTATGCTGATGACATTTGGTGGAACACAGCAGACCTGAACCTGGTTATGAGAGACGGCAAGCGCAAGGCCAGCTGCCAGACCTGCATGAGAGCAGCCTGCAGGCTTGAGCGCCA…
Equine_papillomavirus_2_complete_genome_NC_012123.1	7802	1	4375	NODE_10_length_5103_cov_2.636689	4373	1	4376	99.246	0	CGAGATGCCAAGCAGGCCAGTGCCCGCCAAGAGCTTTGGCGCTCTCTTCTGGTTACTTTGGCGCTGCACCCAGCCAATCTGCAGACTGGGTCTTTGTGAGTCAGCGAATCCTCTGCGGTGCACAGAGCCTTTTTCTAGAGAAGATTGTTGTGGACCACAATCATTAAGATATGCAGGAGGCCCCTGCATCGGAGACGTTCCGCGGAGCTCCAGAGGGAGAGTGAAGACTGCTGGCCACATGTCGATCGTTGGCCTTCTTTGCACCTTTTGTGGAAAGCCGTGTGGCTATGCTGATGACATTTGGTGGAACACAGCAGACCTGAACCTGGTTATGAGAGACGGCAAGCGCAAGGCCAGCTGCCAGACCTGCATGAGAGCAGCCTGCAGGCTTGAGCGCCA…
Equine_papillomavirus_2_isolate_Zurich_2009_HM461973.1_complete_genome	7803	2	4376	NODE_10_length_5103_cov_2.636689	4372	1	4375	98.994	0	GAGATGCCAAGCAGGCCAGTGCCCGCCAAGAGCTTTGGCGCTCTCTTCTGGTTACTTTGGCGCTGCACCCAGCCAATCTGCAGACTGGGTCTTTGTGAGTCAGCGAATCCTCTGCGGTGCACAGAGCCTTTTTCTAGAGAAGATTGTTGTGGACCACAATCATTAAGATATGCAGGAGGCCCCTGCATCGGAGACGTTCCGCGGAGCTCCAGAGGGAGAGTGAAGACTGCTGGCCACATGTCGATCGTTGGCCTTCTTTGCACCTTTTGTGGAAAGCCGTGTGGCTATGCTGATGACATTTGGTGGAACACAGCAGACCTGAACCTGGTTATGAGAGACGGCAAGCGCAAGGCCAGCTGCCAGACCTGCATGAGAGCAGCCTGCAGGCTTGAGCGCCAT…
Equus_caballus_papillomavirus_9_strain_complete_genome_SW_MN117918.1	7656	2369	5134	NODE_44_length_2765_cov_2.798363	2765	1	2766	99.783	0	TATCTATATGCCATGATGGCAGATGTGGACAGGATTGCTGCTGCGTTTCTGTCCTGTACTGCCCAGGCAAAATATGTTCGAGATGTGTCAACCATGGTGAAACACTATAAGCGGGCGGAGATGCATAGCATGAGTATGTCAAACTGGATTCATAAACAGTGTAACAGTGCAGAGGGCGAGGGTGATTGGAGGGTGATAATTAAGTTTCTAAAGTATCAGAATGTGGAAATACCCAGGTTTGTGACAAGCCTAAAGCACTTTCTGAAAGGCGTCCCCAAAAAAAGCTGCTTAGCAATATTTGGGGAGCCTGACACAGGGAAGTCCACATTTTGCTACAGCCTTATTAACTTTCTAAAGGGCAAAGTACTGTCCTTTGCATGCTCCAGAAGTCACTTCTGG…
Equus_caballus_papillomavirus_2_isolate_XJ-ks1391_complete_genome_MW410986.1	7802	4384	6923	NODE_57_length_2540_cov_2.874137	2540	1	2540	99.606	0	TGGGTACCAGCCTGTGGGGCGCGGGGTTGCTCAGGGGGGCGGCAGTGTCCGCGTGGGCACCCCCGTGTCTGTGCTGGAGCCCGGTGTAGGAGTGGAGACGGTGGGACCAAAGGACCTGGTGCCAGTGGACGCCTTGGGGCCCACCACTCCGTCTGTGGTGCCCCTGGGTGAGGGCGATGCCCTGGCGCCAGGCGTGGAAATCTCTGCGGAGGTGCACCCCACGTTTGACCCCACAGCGGCTGGTGGTGCAGGAGGGGTGTCCTCCTCCGGGGGCGAGGCTGCGGTGCTCGAGGTCCCCCCTCAGGTGCAGCCAAGGCCGAGAGGCGGGGTTAGCCGCAGTCAATTCCACAACCCTGCTTTTCAGGTAGAGCTGCTGAGCTCCGCCTCCACGGGGGAAGC…
Equine_papillomavirus_2_isolate_Zurich_2009_HM461973.1_complete_genome	7803	4385	6924	NODE_57_length_2540_cov_2.874137	2540	1	2540	98.465	0	TGGGTACCAGCCTGTGGGGCGCGGGGTTGCTCAGGGGGGCGGCAGTGTCCGCGTGGGCACCCCCGTGTCTGTGCTGGAGCCCGGTGTAGGAGTGGAGACGGTGGGACCAAAGGACCTGGTGCCAGTGGACGCCTTGGGGCCCACCACTCCGTCTGTGGTGCCCCTGGGTGAGGGCGATGCCCTGGCGCCAGGCGTGGAAATCTCTGCGGAGGTGCACCCCACGTTTGACCCCACAGCGGCTGGTGGTGCAGGAGGGGTGTCCTCCTCCGGGGGCGAGGCTGCGGTGCTCGAGGTCCCCCCTCAGGTGCAGCCAAGGCCGAGAGGCGGGGTTAGCCGCAGTCAATTCCACAACCCTGCTTTTCAGGTAGAGCTGCTGAGCTCCGCCTCCACGGGGGAAGC…
Equine_papillomavirus_2_complete_genome_EU503122.1	7802	4384	6923	NODE_57_length_2540_cov_2.874137	2540	1	2540	99.606	0	TGGGTACCAGCCTGTGGGGCGCGGGGTTGCTCAGGGGGGCGGCAGTGTCCGCGTGGGCACCCCCGTGTCTGTGCTGGAGCCCGGTGTAGGAGTGGAGACGGTGGGACCAAAGGACCTGGTGCCAGTGGACGCCTTGGGGCCCACCACTCCGTCTGTGGTGCCCCTGGGTGAGGGCGATGCCCTGGCGCCAGGCGTGGAAATCTCTGCGGAGGTGCACCCCACGTTTGACCCCACAGCGGCTGGTGGTGCAGGAGGGGTGTCCTCCTCCGGGGGCGAGGCTGCGGTGCTCGAGGTCCCCCCTCAGGTGCAGCCAAGGCCGAGAGGCGGGGTTAGCCGCAGTCAATTCCACAACCCTGCTTTTCAGGTAGAGCTGCTGAGCTCCGCCTCCACGGGGGAAGC…
Equine_papillomavirus_2_complete_genome_NC_012123.1	7802	4384	6923	NODE_57_length_2540_cov_2.874137	2540	1	2540	99.606	0	TGGGTACCAGCCTGTGGGGCGCGGGGTTGCTCAGGGGGGCGGCAGTGTCCGCGTGGGCACCCCCGTGTCTGTGCTGGAGCCCGGTGTAGGAGTGGAGACGGTGGGACCAAAGGACCTGGTGCCAGTGGACGCCTTGGGGCCCACCACTCCGTCTGTGGTGCCCCTGGGTGAGGGCGATGCCCTGGCGCCAGGCGTGGAAATCTCTGCGGAGGTGCACCCCACGTTTGACCCCACAGCGGCTGGTGGTGCAGGAGGGGTGTCCTCCTCCGGGGGCGAGGCTGCGGTGCTCGAGGTCCCCCCTCAGGTGCAGCCAAGGCCGAGAGGCGGGGTTAGCCGCAGTCAATTCCACAACCCTGCTTTTCAGGTAGAGCTGCTGAGCTCCGCCTCCACGGGGGAAGC…
Equus_caballus_papillomavirus_9_strain_complete_genome_SW_MN117918.1	7656	1	1957	NODE_59_length_2527_cov_3.244898	571	2527	1957	100	0	CCCCTTCCTGAAATATTTTTTTTTACATACCCCAATAAAGATGTATTATTCAGTTATGTGTCATGGTGTTTCATTGCACCGCGCCCGGTTCTGGCATTCAAACCCACCCTCTGAGCGCTGCTGGTACAGGTATAAGACCGCACCTGGTGTCAGTGTCAGCCAAGGTTCCAGGCCAGGAGCGCGGGCGGTGCGGCACACGTCCAGAGGATCCATTACCATCAATCAAGGTAAGGTCAAGGTAAGGCTAATTAAACACCGGGAACGGTGCCCTTATTGTTTGCAGGTGATTTATGGGGGCAATTCAGGCGGCAAACCGCGTGTGGTGCCCTGGAATGTGCAACCCTAGCGGTCTTCACCGGGTGCGGTGTGGCACTCCTAGGTTTGCTTTCTAATCTTCTA…
Equus_caballus_papillomavirus_9_strain_complete_genome_SW_MN117918.1	7656	5163	6814	NODE_142_length_1652_cov_2.527619	1652	1	1652	99.939	0	CCCCGAGGGGGTGGGGGGCGTACACAGTATCACAATCCCTCTGTACACGTCACATTGCACAGCTCTCTGGGCACTGGGGAAACCTCAAGCTCAGACCATGTTTTTATATTTGGGGACACGGGGGGACATGACATTGGTGGGGAGTCTATAGAACTGCAGGTGCTTGGAGACGGACCGCGCACGAGCACACCAGGGACGCGCACGCGCGCAGCCGGGCCTCGGCGCGGTTTGTTTGGAAGGTTTTTTCAACAGGCTCCTGTGGAGGACCCTGTGTTTCTCTCCTCCCCTGGAAAGCTAGTGCAGTTTGGCTATGAAAACCCCACTTTTGATGCCTCTGGGAGCCTGGACTTTCCTTTTGGGGACGATGCTCCGGCTGCAGCGCCGGACCCTGCATTCCAG…
Equus_caballus_papillomavirus_9_strain_complete_genome_SW_MN117918.1	7656	1646	3203	NODE_10_length_5103_cov_2.636689	3110	1538	1595	65.768	3.01e-90	CCTCAAGTGAAGAGGCGGCTCTTCGAGCCCCC-GCAACCGGGAAGCGGGGGGCGTCCGGGTGTAAGCTATGAAGCTCACGGTTTTTACAGCAGGACGGACCTTCAGGTAGAGACACCGCTGGGCATACAGGGTGGACGGGTCC--CTCTGCGGAGCATAGAGAATGTGGACAGTCACGC--TGGCACGCAGCACTTGGACGTGCTGCGTGCCAGTAACAGGGAGGCGGCCATGTTAGGCCGCTTTAA-GA--CCTGTTTTGAAGTGGGATTTAATGAATTGACAAGGCCTTTTACTAGCAACAAGACCTGTGCCAAGCAGTGGGTGGTGCTTGTGTATTCTGTTCGGGAAGCCCTTTTTGAAGCAGCAAAAGAACTGCTGCGACAGCACTGTGACTATG…
Equus_caballus_papillomavirus_9_strain_complete_genome_SW_MN117918.1	7656	6087	7394	NODE_57_length_2540_cov_2.874137	1315	5	1324	70.619	2.02e-168	TTCGATCTGCACCCCTCCCTGCACCCCCGCAAACGCAAACGGCGGTACAATTGCTGTTTTGCAGATGGCTTTCTGGACAATGAACAGACAACACCTGTACCTACCCCCCAATCCCGTCTCTAGGGTTTTGGGGACTGATGAGTATGTGAAGCGGCTGTCGGTGTTCTATCATGGTAACAGCGAGCGTATGCTCATGGTGGGCCACCCCTTCTTTGCCCTCAAAAATGACAGGGACAAGCTGGACGTTCCCAAGGTGTCCTCTAATCAGTACAGGGTGTTTGAGGTAGTTCTCCCAAATCCCAACAAATTTGCTCTTGCAGATCAGAACATTTACAACCCAGAGACCTCCAGACTTGTCTGGGCTCTCCGCGGTGTCGAGGTGTCACGGGGGCAGCCTCT…
Equus_ferus_caballus_papillomavirus_type_4_complete_genome_NC_020085.1	7554	5398	6639	NODE_57_length_2540_cov_2.874137	1282	23	1278	65.884	1.65e-74	CGCAAACGGCGGTACAATTGCTGTTTTGCAGATGGCTTTCTGGACAATGAACAGACAACACCTGTACCTACCCCCCAATCCCGTCTCTAGGGTTTTGGGGACTGATGAGTATGTGAAGCGGCTGTCGGTGTTCTATCATGGTAACAGCGAGCGTATGCTCATGGTGGGCCACCCCTTCTTTGCCCTCAAAAATGACAGGGACAAGCTGGACGTTCCCAAGGTGTCCTCTAATCAGTACAGGGTGTTTGAGGTAGTTCTCCCAAATCCCAACAAATTTGCTCTTGCAGATCAGAACATTTACAACCCAGAGACCTCCAGACTTGTCTGGGCTCTCCGCGGTGTCGAGGTGTCACGGGGGCAGCCTCTGGGCATCGGGGTGACAGGAAGCACAGTGTTTAA…
Equus_ferus_caballus_papillomavirus_type_4_complete_genome_JQ031032.1	7554	5398	6639	NODE_57_length_2540_cov_2.874137	1282	23	1278	65.884	1.65e-74	CGCAAACGGCGGTACAATTGCTGTTTTGCAGATGGCTTTCTGGACAATGAACAGACAACACCTGTACCTACCCCCCAATCCCGTCTCTAGGGTTTTGGGGACTGATGAGTATGTGAAGCGGCTGTCGGTGTTCTATCATGGTAACAGCGAGCGTATGCTCATGGTGGGCCACCCCTTCTTTGCCCTCAAAAATGACAGGGACAAGCTGGACGTTCCCAAGGTGTCCTCTAATCAGTACAGGGTGTTTGAGGTAGTTCTCCCAAATCCCAACAAATTTGCTCTTGCAGATCAGAACATTTACAACCCAGAGACCTCCAGACTTGTCTGGGCTCTCCGCGGTGTCGAGGTGTCACGGGGGCAGCCTCTGGGCATCGGGGTGACAGGAAGCACAGTGTTTAA…
Equus_ferus_caballus_papillomavirus_type_5_complete_genome_JQ031033.1	7519	5398	6634	NODE_57_length_2540_cov_2.874137	1265	8	1271	65.696	1.87e-67	TTGCTGTTTTGCAGATGGCTTTCTGGACAATGAACAGACAACACCTGTACCTACCCCCCAATCCCGTCTCTAGGGTTTTGGGGACTGATGAGTATGTGAAGCGGCTGTCGGTGTTCTATCATGGTAACAGCGAGCGTATGCTCATGGTGGGCCACCCCTTCTTTGCCCTCAAAAATGACAGGGACAAGCTGGACGTTCCCAAGGTGTCCTCTAATCAGTACAGGGTGTTTGAGGTAGTTCTCCCAAATCCCAACAAATTTGCTCTTGCAGATCAGAACATTTACAACCCAGAGACCTCCAGACTTGTCTGGGCTCTCCGCGGTGTCGAGGTGTCACGGGGGCAGCCTCTGGGCATCGGGGTGACAGGAAG-CACAGTGTTTAACAAGCTGTATGATGTA…
Equus_ferus_caballus_papillomavirus_type_5_complete_genome_NC_020084.1	7519	5398	6634	NODE_57_length_2540_cov_2.874137	1265	8	1271	65.696	1.87e-67	TTGCTGTTTTGCAGATGGCTTTCTGGACAATGAACAGACAACACCTGTACCTACCCCCCAATCCCGTCTCTAGGGTTTTGGGGACTGATGAGTATGTGAAGCGGCTGTCGGTGTTCTATCATGGTAACAGCGAGCGTATGCTCATGGTGGGCCACCCCTTCTTTGCCCTCAAAAATGACAGGGACAAGCTGGACGTTCCCAAGGTGTCCTCTAATCAGTACAGGGTGTTTGAGGTAGTTCTCCCAAATCCCAACAAATTTGCTCTTGCAGATCAGAACATTTACAACCCAGAGACCTCCAGACTTGTCTGGGCTCTCCGCGGTGTCGAGGTGTCACGGGGGCAGCCTCTGGGCATCGGGGTGACAGGAAG-CACAGTGTTTAACAAGCTGTATGATGTA…
Equus_caballus_papillomavirus_1_strain_150904_complete_genome_MF288893.1	7613	1629	2555	NODE_10_length_5103_cov_2.636689	2462	1533	951	66.456	1.05e-51	CACCAGTGTGAGGAGGCGATGAAATTTGAGTTTTCAGACATGGTGCAGTGGGCCTATGACAACCACG-TCACAGAGGAAAGTCAGATAGCATATGGGTACGCTAGCCTAGCGGACACTAATGCCAATGCTGCAGCATTTCT-GGCCTGCGCGTCTCAAGCTAAGTATGTGCGAGATGTGGCCACGATGGTCAAATATTACCGCAGAGCGGAGATGCAGAACATGTCAATATCTGAATGGATTCACAGGCAGGCAGAGAGAATAGAGGGGGAGGGCGATTGGCGGCCCATCATAAACTTTCTGAAGCACCAGGGTGTTGAAATCTCGGTGTTCATTAACAAC---CTGAAGCAGTTTGTTAAGGGGGTCCCCAAAAAAAATTGCATGGTGCTCGTGGGGC…
Equus_caballus_papillomavirus_type_1_complete_genome_AF498323.1	7610	1629	2555	NODE_10_length_5103_cov_2.636689	2462	1533	951	66.351	1.28e-50	CACCAGTGTGAGGAGGCGATGAAATTTGAGTTTTCAGACATGGTGCAGTGGGCCTATGACAACCACG-TCACAGAGGAAAGTCAGATAGCATATGGGTACGCTAGCCTAGCGGACACTAATGCCAATGCTGCAGCATTTCT-GGCCTGCGCGTCTCAAGCTAAGTATGTGCGAGATGTGGCCACGATGGTCAAATATTACCGCAGAGCGGAGATGCAGAACATGTCAATATCTGAATGGATTCACAGGCAGGCAGAGAGAATAGAGGGGGAGGGCGATTGGCGGCCCATCATAAACTTTCTGAAGCACCAGGGTGTTGAAATCTCGGTGTTCATTAACAAC---CTGAAGCAGTTTGTTAAGGGGGTCCCCAAAAAAAATTGCATGGTGCTCGTGGGGC…
Equus_caballus_papillomavirus_type_1_complete_genome_NC_003748.1	7610	1629	2555	NODE_10_length_5103_cov_2.636689	2462	1533	951	66.351	1.28e-50	CACCAGTGTGAGGAGGCGATGAAATTTGAGTTTTCAGACATGGTGCAGTGGGCCTATGACAACCACG-TCACAGAGGAAAGTCAGATAGCATATGGGTACGCTAGCCTAGCGGACACTAATGCCAATGCTGCAGCATTTCT-GGCCTGCGCGTCTCAAGCTAAGTATGTGCGAGATGTGGCCACGATGGTCAAATATTACCGCAGAGCGGAGATGCAGAACATGTCAATATCTGAATGGATTCACAGGCAGGCAGAGAGAATAGAGGGGGAGGGCGATTGGCGGCCCATCATAAACTTTCTGAAGCACCAGGGTGTTGAAATCTCGGTGTTCATTAACAAC---CTGAAGCAGTTTGTTAAGGGGGTCCCCAAAAAAAATTGCATGGTGCTCGTGGGGC…
Equus_caballus_papillomavirus_1_isolate_G2_complete_genome_MN164462.1	7611	1629	2555	NODE_10_length_5103_cov_2.636689	2462	1533	947	66.315	1.05e-51	CACCAGTGTGAGGAGGCGATGAAATTTGAGTTTTCAGACATGGTGCAGTGGGCCTATGACAACCACG-TCACAGAGGAAAGTCAGATAGCATATGGGTACGCTAGCCTAGCGGACACTAATGCCAATGCTGCAGCATTTCT-GGCCTGCGCGTCTCAAGCTAAGTATGTGCGAGATGTGGCCACGATGGTCAAATATTACCGCAGAGCGGAGATGCAGAACATGTCAATATCTGAATGGATTCACAGGCAGGCAGAGAGAATAGAGGGGGAGGGCGATTGGCGGCCCATCATAAACTTTCTGAAGCACCAGGGTGTTGAAATCTCGGTGTTCATTAACAACCTGAAGCAGTTTGTTAAGGGGGTCCCCAAAAAAAATTGCATGGTGCTCGTGGGGCCAC…
Equus_ferus_caballus_papillomavirus_type_4_complete_genome_NC_020085.1	7554	1659	2540	NODE_10_length_5103_cov_2.636689	2420	1539	896	64.509	3.63e-32	GTGCAGTGGGCCTATGACAACCACGTCACAGAGGAAAGTCAGATAGCATATGGGTACGCTAGCCTAGCGGACACTAATGCCAATGCTGCAGCATTTCTGGCCTGCGCGTCTCAAGCTAAGTATGTGCGAGATGTGGCCACGATGGTCAAATATTACCGCAGAGCGGAGATGCAGAACATGTCAATATCTGAATGGATTCACAGGCAGGCAGAG-AGAATAGAGGGGGAGGGCGATTGGCGGCCCATCATAAACTTTCTGAAGCACCAGGGTGTTGAAATC-TCGGTGTTCATTAACAACCTGAAGCAGTTTGTTAAGGGGGTCCCCAAAAAAAATTGCATGGTGCTCGTGGGGCCACCAAACACTGGCAAGTC-CAGCTTTGCTGTGAGCTTGCTGGAG…
Equus_ferus_caballus_papillomavirus_type_4_complete_genome_JQ031032.1	7554	1659	2540	NODE_10_length_5103_cov_2.636689	2420	1539	896	64.509	3.63e-32	GTGCAGTGGGCCTATGACAACCACGTCACAGAGGAAAGTCAGATAGCATATGGGTACGCTAGCCTAGCGGACACTAATGCCAATGCTGCAGCATTTCTGGCCTGCGCGTCTCAAGCTAAGTATGTGCGAGATGTGGCCACGATGGTCAAATATTACCGCAGAGCGGAGATGCAGAACATGTCAATATCTGAATGGATTCACAGGCAGGCAGAG-AGAATAGAGGGGGAGGGCGATTGGCGGCCCATCATAAACTTTCTGAAGCACCAGGGTGTTGAAATC-TCGGTGTTCATTAACAACCTGAAGCAGTTTGTTAAGGGGGTCCCCAAAAAAAATTGCATGGTGCTCGTGGGGCCACCAAACACTGGCAAGTC-CAGCTTTGCTGTGAGCTTGCTGGAG…
Equus_caballus_papillomavirus_1_strain_150904_complete_genome_MF288893.1	7613	1725	2547	NODE_44_length_2765_cov_2.798363	2759	1934	839	64.601	1.28e-31	TATGCCATGATGGCAGATGTGGACAGGATTGCTGCTGCGTTTCT-GTCCTGTACTGCCCAGGCAAAATATGTTCGAGATGTGTCAACCATGGTGAAACACTATAAGCGGGCGGAGATGCATAGCATGAGTATGTCAAACTGGATTCATAA-ACAGTGTAACAGTGCAGAGGGCGAGGGTGATTGGAGGGTGATAATTAAGTTTCTAAAGTATCAGAATGTGGAAATACCCAGGTTTGTGACAAGC-CTAAAGCACTTTCTGAAAGGCGTCCCCAAAAAAAGCTGCTTAGCAATATTTGGGGAGCCTGACACAGGGAAGTCCACATTTTGCTACAGCCTTATTAACTTTCTAAAGGGCAAAGTACTGTCCTTTGCATGCTCCAGAAGTCACTTCTGGCTT…
Equus_caballus_papillomavirus_type_1_complete_genome_AF498323.1	7610	1725	2547	NODE_44_length_2765_cov_2.798363	2759	1934	839	64.72	1.05e-32	TATGCCATGATGGCAGATGTGGACAGGATTGCTGCTGCGTTTCT-GTCCTGTACTGCCCAGGCAAAATATGTTCGAGATGTGTCAACCATGGTGAAACACTATAAGCGGGCGGAGATGCATAGCATGAGTATGTCAAACTGGATTCATAA-ACAGTGTAACAGTGCAGAGGGCGAGGGTGATTGGAGGGTGATAATTAAGTTTCTAAAGTATCAGAATGTGGAAATACCCAGGTTTGTGACAAGC-CTAAAGCACTTTCTGAAAGGCGTCCCCAAAAAAAGCTGCTTAGCAATATTTGGGGAGCCTGACACAGGGAAGTCCACATTTTGCTACAGCCTTATTAACTTTCTAAAGGGCAAAGTACTGTCCTTTGCATGCTCCAGAAGTCACTTCTGGCTT…
Equus_caballus_papillomavirus_type_1_complete_genome_NC_003748.1	7610	1725	2547	NODE_44_length_2765_cov_2.798363	2759	1934	839	64.72	1.05e-32	TATGCCATGATGGCAGATGTGGACAGGATTGCTGCTGCGTTTCT-GTCCTGTACTGCCCAGGCAAAATATGTTCGAGATGTGTCAACCATGGTGAAACACTATAAGCGGGCGGAGATGCATAGCATGAGTATGTCAAACTGGATTCATAA-ACAGTGTAACAGTGCAGAGGGCGAGGGTGATTGGAGGGTGATAATTAAGTTTCTAAAGTATCAGAATGTGGAAATACCCAGGTTTGTGACAAGC-CTAAAGCACTTTCTGAAAGGCGTCCCCAAAAAAAGCTGCTTAGCAATATTTGGGGAGCCTGACACAGGGAAGTCCACATTTTGCTACAGCCTTATTAACTTTCTAAAGGGCAAAGTACTGTCCTTTGCATGCTCCAGAAGTCACTTCTGGCTT…
Equus_caballus_papillomavirus_1_isolate_G2_complete_genome_MN164462.1	7611	1725	2547	NODE_44_length_2765_cov_2.798363	2759	1934	838	64.32	1.56e-30	TATGCCATGATGGCAGATGTGGACAGGATTGCTGCTGCGTTTCT-GTCCTGTACTGCCCAGGCAAAATATGTTCGAGATGTGTCAACCATGGTGAAACACTATAAGCGGGCGGAGATGCATAGCATGAGTATGTCAAACTGGATTCATAA-ACAGTGTAACAGTGCAGAGGGCGAGGGTGATTGGAGGGTGATAATTAAGTTTCTAAAGTATCAGAATGTGGAAATACCCAGGTTTGTGACAAGC-CTAAAGCACTTTCTGAAAGGCGTCCCCAAAAAAAGCTGCTTAGCAATATTTGGGGAGCCTGACACAGGGAAGTCCACATTTTGCTACAGCCTTATTAACTTTCTAAAGGGCAAAGTACTGTCCTTTGCATGCTCCAGAAGTCACTTCTGGCTT…
Equus_caballus_papillomavirus_2_isolate_XJ-ks1391_complete_genome_MW410986.1	7802	2039	2838	NODE_44_length_2765_cov_2.798363	2730	1931	810	68.395	8.8e-72	TGCTGCTGCGTTTCTGTCCTGTACTGCCCAGGCAAAATATGTTCGAGATGTGTCAACCATGGTGAAACACTATAAGCGGGCGGAGATGCATAGCATGAGTATGTCAAACTGGATTCATAAACAGTGTAACAGTGCAGAGGGCGAGGGTGATTGGAGGGTGATAATTAAGTTTCTAAAGTATCAGAATGTGGAAATACCCAGGTTTGTGACAAGCCTAAAGCACTTTCTGAAAGGCGTCCCCAAAAAAAGCTGCTTAGCAATATTTGGGGAGCCTGACACAGGGAAGTCCACATTTTGCT-ACAGCCTTATTAACTTTCTAAAGGGCAAAGTACTGTCCTTTGCATGCTCCAGAAGTCACTTCTGGCTTAGTCCCCTAGCAGACTGTCGGGTCGCCCTGG…
Equine_papillomavirus_2_isolate_Zurich_2009_HM461973.1_complete_genome	7803	2040	2839	NODE_44_length_2765_cov_2.798363	2730	1931	810	68.395	8.81e-72	TGCTGCTGCGTTTCTGTCCTGTACTGCCCAGGCAAAATATGTTCGAGATGTGTCAACCATGGTGAAACACTATAAGCGGGCGGAGATGCATAGCATGAGTATGTCAAACTGGATTCATAAACAGTGTAACAGTGCAGAGGGCGAGGGTGATTGGAGGGTGATAATTAAGTTTCTAAAGTATCAGAATGTGGAAATACCCAGGTTTGTGACAAGCCTAAAGCACTTTCTGAAAGGCGTCCCCAAAAAAAGCTGCTTAGCAATATTTGGGGAGCCTGACACAGGGAAGTCCACATTTTGCT-ACAGCCTTATTAACTTTCTAAAGGGCAAAGTACTGTCCTTTGCATGCTCCAGAAGTCACTTCTGGCTTAGTCCCCTAGCAGACTGTCGGGTCGCCCTGG…
Equine_papillomavirus_2_complete_genome_EU503122.1	7802	2039	2838	NODE_44_length_2765_cov_2.798363	2730	1931	810	68.395	8.8e-72	TGCTGCTGCGTTTCTGTCCTGTACTGCCCAGGCAAAATATGTTCGAGATGTGTCAACCATGGTGAAACACTATAAGCGGGCGGAGATGCATAGCATGAGTATGTCAAACTGGATTCATAAACAGTGTAACAGTGCAGAGGGCGAGGGTGATTGGAGGGTGATAATTAAGTTTCTAAAGTATCAGAATGTGGAAATACCCAGGTTTGTGACAAGCCTAAAGCACTTTCTGAAAGGCGTCCCCAAAAAAAGCTGCTTAGCAATATTTGGGGAGCCTGACACAGGGAAGTCCACATTTTGCT-ACAGCCTTATTAACTTTCTAAAGGGCAAAGTACTGTCCTTTGCATGCTCCAGAAGTCACTTCTGGCTTAGTCCCCTAGCAGACTGTCGGGTCGCCCTGG…
Equine_papillomavirus_2_complete_genome_NC_012123.1	7802	2039	2838	NODE_44_length_2765_cov_2.798363	2730	1931	810	68.395	8.8e-72	TGCTGCTGCGTTTCTGTCCTGTACTGCCCAGGCAAAATATGTTCGAGATGTGTCAACCATGGTGAAACACTATAAGCGGGCGGAGATGCATAGCATGAGTATGTCAAACTGGATTCATAAACAGTGTAACAGTGCAGAGGGCGAGGGTGATTGGAGGGTGATAATTAAGTTTCTAAAGTATCAGAATGTGGAAATACCCAGGTTTGTGACAAGCCTAAAGCACTTTCTGAAAGGCGTCCCCAAAAAAAGCTGCTTAGCAATATTTGGGGAGCCTGACACAGGGAAGTCCACATTTTGCT-ACAGCCTTATTAACTTTCTAAAGGGCAAAGTACTGTCCTTTGCATGCTCCAGAAGTCACTTCTGGCTTAGTCCCCTAGCAGACTGTCGGGTCGCCCTGG…
Equus_caballus_papillomavirus_8_strain_NCSU_complete_genome_KU963288.1	8155	1848	2626	NODE_44_length_2765_cov_2.798363	2711	1933	787	63.405	9.23e-15	TGTACTGCCCAGGCAAAATATGTTCGAGA-TGTGTCAACCATGGTGAAACACTATAAGCGGGCGGAGATGCATAGCATGAGTATGTCAAACTGGATTCATAA-ACAGTGTAACAGTGCAGAGGGCGAGGGTGATTGGAGGGTGATAATTAAGTTTCTAAAGTATCAGAATGTGGAAATACCCAGGTTTGTGACAAGCCTAAAGCACTTTCTGAAAGGCGTCCCCAAAAAAAGCTGCTTAGCAATATTTGGGGAGC--CTGACACAGGGAAGTCCACATTTTGCTACAGCCTTATTAACTTTCTAAAGGGCAAAGTACTGTCCTTTGCATGCTCCAGAAGTCACTTCTGGCTTAGTCCCCTAGCAGACTGTCGGGTCGCCCTGGTGGATGATGCAACAGG…
Equus_caballus_papillomavirus_8_strain_NCSU_complete_genome_NC_031756.1	8155	1848	2626	NODE_44_length_2765_cov_2.798363	2711	1933	787	63.405	9.23e-15	TGTACTGCCCAGGCAAAATATGTTCGAGA-TGTGTCAACCATGGTGAAACACTATAAGCGGGCGGAGATGCATAGCATGAGTATGTCAAACTGGATTCATAA-ACAGTGTAACAGTGCAGAGGGCGAGGGTGATTGGAGGGTGATAATTAAGTTTCTAAAGTATCAGAATGTGGAAATACCCAGGTTTGTGACAAGCCTAAAGCACTTTCTGAAAGGCGTCCCCAAAAAAAGCTGCTTAGCAATATTTGGGGAGC--CTGACACAGGGAAGTCCACATTTTGCTACAGCCTTATTAACTTTCTAAAGGGCAAAGTACTGTCCTTTGCATGCTCCAGAAGTCACTTCTGGCTTAGTCCCCTAGCAGACTGTCGGGTCGCCCTGGTGGATGATGCAACAGG…
Equus_caballus_papillomavirus_2_isolate_XJ-ks1391_complete_genome_MW410986.1	7802	6609	7339	NODE_59_length_2527_cov_3.244898	1	719	750	70.933	8.8e-91	CTGCAGCGCGCACAGGGCCTAAATAATGGCGTCTGCTGGCATGACAAGCTTTATGTTACAGTGTTTGACAATACTAGGGGCACCAACTTTACTATATCTGTAAAGAAG---CAGGCGGCTGGTGGTGATCAGTATGATCCT--AAGAACTATCATGTGTACCTCAGGCATGTAGAGGAGTTTGAACTATCTTTTATTTTTGAGCTTTGCAGCGTGCCACTGACCCCGGAGACCATGGCGCACCTGCACACTATGGACCCCACCATATTAGAGGACTGGGAGATAGGCATTAACCCCCCTGTTTCATCCCAGCT-TGAGACCACGTACAGGTTTATTGCCTCCTCAGCCACCCGCTGCAACCGCCCTCCAGCCCCCCCCCTCGAGCCTTCTAAAGGCACC…
Equine_papillomavirus_2_isolate_Zurich_2009_HM461973.1_complete_genome	7803	6610	7340	NODE_59_length_2527_cov_3.244898	1	719	750	71.2	1.7e-93	CTGCAGCGCGCACAGGGCCTAAATAATGGCGTCTGCTGGCATGACAAGCTTTATGTTACAGTGTTTGACAATACTAGGGGCACCAACTTTACTATATCTGTAAAGAAG---CAGGCGGCTGGTGGTGATCAGTATGATCCT--AAGAACTATCATGTGTACCTCAGGCATGTAGAGGAGTTTGAACTATCTTTTATTTTTGAGCTTTGCAGCGTGCCACTGACCCCGGAGACCATGGCGCACCTGCACACTATGGACCCCACCATATTAGAGGACTGGGAGATAGGCATTAACCCCCCTGTTTCATCCCAGCTTG-AGACCACGTACAGGTTTATTGCCTCCTCAGCCACCCGCTGCAACCGCCCTCCAGCCCCCCCCCTCGAGCCTTCTAAAGGCACC…
Equine_papillomavirus_2_complete_genome_EU503122.1	7802	6609	7339	NODE_59_length_2527_cov_3.244898	1	719	750	71.333	1.39e-94	CTGCAGCGCGCACAGGGCCTAAATAATGGCGTCTGCTGGCATGACAAGCTTTATGTTACAGTGTTTGACAATACTAGGGGCACCAACTTTACTATATCTGTAAAGAAG---CAGGCGGCTGGTGGTGATCAGTATGATCCT--AAGAACTATCATGTGTACCTCAGGCATGTAGAGGAGTTTGAACTATCTTTTATTTTTGAGCTTTGCAGCGTGCCACTGACCCCGGAGACCATGGCGCACCTGCACACTATGGACCCCACCATATTAGAGGACTGGGAGATAGGCATTAACCCCCCTGTTTCATCCCAGCT-TGAGACCACGTACAGGTTTATTGCCTCCTCAGCCACCCGCTGCAACCGCCCTCCAGCCCCCCCCCTCGAGCCTTCTAAAGGCACC…
Equine_papillomavirus_2_complete_genome_NC_012123.1	7802	6609	7339	NODE_59_length_2527_cov_3.244898	1	719	750	71.333	1.39e-94	CTGCAGCGCGCACAGGGCCTAAATAATGGCGTCTGCTGGCATGACAAGCTTTATGTTACAGTGTTTGACAATACTAGGGGCACCAACTTTACTATATCTGTAAAGAAG---CAGGCGGCTGGTGGTGATCAGTATGATCCT--AAGAACTATCATGTGTACCTCAGGCATGTAGAGGAGTTTGAACTATCTTTTATTTTTGAGCTTTGCAGCGTGCCACTGACCCCGGAGACCATGGCGCACCTGCACACTATGGACCCCACCATATTAGAGGACTGGGAGATAGGCATTAACCCCCCTGTTTCATCCCAGCT-TGAGACCACGTACAGGTTTATTGCCTCCTCAGCCACCCGCTGCAACCGCCCTCCAGCCCCCCCCCTCGAGCCTTCTAAAGGCACC…
Equus_caballus_papillomavirus_1_strain_150904_complete_genome_MF288893.1	7613	5318	5991	NODE_57_length_2540_cov_2.874137	1150	489	689	64.151	3.21e-20	CTATCATGGTAACAGCGAGCGTATGCTCATGGTGGGCCACCCCTTCTTTGCCCTCAAAAATGACAGGGAC--AAGC-TGGACGTTCCCAAGGTGTCCTCTAATCAGTACAGGGTGTTTGAG-GTAGTTCTCCCAAATCCCAACAAATTTGCTCTTGCAGATCAGAACATTTACAACCCAGAGACCTCCAGACTTGTCTGGGCTCTCCGCGGTGTCGAGGTGTCACGGGGGCAGCCTCT-GGGCATCGGGGTGACAGGAAGCACAGTGTTTAACAAGCTGTATGATGTAGAAAACCCAG----GGAAACGACAGGAAGCTGCAGGGGAGCGCGAGGATAAGCGTGTTAATATGGGCTTCGATGTGAAGCAGTCTCAGCTTTTGATGGTGGGCTGCAAGCC…
Equus_caballus_papillomavirus_type_1_complete_genome_AF498323.1	7610	5315	5988	NODE_57_length_2540_cov_2.874137	1150	489	689	64.006	1.36e-18	CTATCATGGTAACAGCGAGCGTATGCTCATGGTGGGCCACCCCTTCTTTGCCCTCAAAAATGACAGGGAC--AAGC-TGGACGTTCCCAAGGTGTCCTCTAATCAGTACAGGGTGTTTGAG-GTAGTTCTCCCAAATCCCAACAAATTTGCTCTTGCAGATCAGAACATTTACAACCCAGAGACCTCCAGACTTGTCTGGGCTCTCCGCGGTGTCGAGGTGTCACGGGGGCAGCCTCT-GGGCATCGGGGTGACAGGAAGCACAGTGTTTAACAAGCTGTATGATGTAGAAAACCCAG----GGAAACGACAGGAAGCTGCAGGGGAGCGCGAGGATAAGCGTGTTAATATGGGCTTCGATGTGAAGCAGTCTCAGCTTTTGATGGTGGGCTGCAAGCC…
Equus_caballus_papillomavirus_type_1_complete_genome_NC_003748.1	7610	5315	5988	NODE_57_length_2540_cov_2.874137	1150	489	689	64.006	1.36e-18	CTATCATGGTAACAGCGAGCGTATGCTCATGGTGGGCCACCCCTTCTTTGCCCTCAAAAATGACAGGGAC--AAGC-TGGACGTTCCCAAGGTGTCCTCTAATCAGTACAGGGTGTTTGAG-GTAGTTCTCCCAAATCCCAACAAATTTGCTCTTGCAGATCAGAACATTTACAACCCAGAGACCTCCAGACTTGTCTGGGCTCTCCGCGGTGTCGAGGTGTCACGGGGGCAGCCTCT-GGGCATCGGGGTGACAGGAAGCACAGTGTTTAACAAGCTGTATGATGTAGAAAACCCAG----GGAAACGACAGGAAGCTGCAGGGGAGCGCGAGGATAAGCGTGTTAATATGGGCTTCGATGTGAAGCAGTCTCAGCTTTTGATGGTGGGCTGCAAGCC…
Equus_caballus_papillomavirus_2_isolate_XJ-ks1391_complete_genome_MW410986.1	7802	5609	6290	NODE_142_length_1652_cov_2.527619	728	53	683	69.693	1.4e-75	TTTGACCTGCACCCCTCACTCCTGAGGCGCAAGAGGAAACGGAGGTATGCTTCCTGTTTTCCAGATGGCATTGTGGACCAAGAATATGCAGCATCTGTACCTGCCGCCGCCGCCTGTTACTAAGGTGCTCAGCACGGATGACTATGTTGTCAGACACTCCATATTTTATCATGGCAACAGTGAGCGCTTGCTTACAGTGGGCCATCCCTATTTTGCACTTAAGGATGGGGGTAAAAAACTGGATGTTCCTAAGGTGTCCCCAAATCAGTATAGGGTGTTTGAGGTGGTTTTGCCAAACCCCAACAAATTTGCCTTAGCTGACCCTAGCATCTATAACCCAGAGGTGTCTAGGCTGGTGTGGGCAGTGCGGGGCCTAGAGGTTTCACGTGGTCAGCCTCT…
Equine_papillomavirus_2_isolate_Zurich_2009_HM461973.1_complete_genome	7803	5610	6291	NODE_142_length_1652_cov_2.527619	728	53	683	69.839	1.15e-76	TTTGACCTGCACCCCTCACTCCTGAGGCGCAAGAGGAAACGGAGGTATGCTTCCTGTTTTCCAGATGGCATTGTGGACCAAGAATATGCAGCATCTGTACCTGCCGCCGCCGCCTGTTACTAAGGTGCTCAGCACGGATGACTATGTTGTCAGACACTCCATATTTTATCATGGCAACAGTGAGCGCTTGCTTACAGTGGGCCATCCCTATTTTGCACTTAAGGATGGGGGTAAAAAACTGGATGTTCCTAAGGTGTCCCCAAATCAGTATAGGGTGTTTGAGGTGGTTTTGCCAAACCCCAACAAATTTGCCTTAGCTGACCCTAGCATCTATAACCCAGAGGTGTCTAGGCTGGTGTGGGCAGTGCGGGGCCTAGAGGTTTCACGTGGTCAGCCTCT…
Equine_papillomavirus_2_complete_genome_EU503122.1	7802	5609	6290	NODE_142_length_1652_cov_2.527619	728	53	683	69.693	1.4e-75	TTTGACCTGCACCCCTCACTCCTGAGGCGCAAGAGGAAACGGAGGTATGCTTCCTGTTTTCCAGATGGCATTGTGGACCAAGAATATGCAGCATCTGTACCTGCCGCCGCCGCCTGTTACTAAGGTGCTCAGCACGGATGACTATGTTGTCAGACACTCCATATTTTATCATGGCAACAGTGAGCGCTTGCTTACAGTGGGCCATCCCTATTTTGCACTTAAGGATGGGGGTAAAAAACTGGATGTTCCTAAGGTGTCCCCAAATCAGTATAGGGTGTTTGAGGTGGTTTTGCCAAACCCCAACAAATTTGCCTTAGCTGACCCTAGCATCTATAACCCAGAGGTGTCTAGGCTGGTGTGGGCAGTGCGGGGCCTAGAGGTTTCACGTGGTCAGCCTCT…
Equine_papillomavirus_2_complete_genome_NC_012123.1	7802	5609	6290	NODE_142_length_1652_cov_2.527619	728	53	683	69.693	1.4e-75	TTTGACCTGCACCCCTCACTCCTGAGGCGCAAGAGGAAACGGAGGTATGCTTCCTGTTTTCCAGATGGCATTGTGGACCAAGAATATGCAGCATCTGTACCTGCCGCCGCCGCCTGTTACTAAGGTGCTCAGCACGGATGACTATGTTGTCAGACACTCCATATTTTATCATGGCAACAGTGAGCGCTTGCTTACAGTGGGCCATCCCTATTTTGCACTTAAGGATGGGGGTAAAAAACTGGATGTTCCTAAGGTGTCCCCAAATCAGTATAGGGTGTTTGAGGTGGTTTTGCCAAACCCCAACAAATTTGCCTTAGCTGACCCTAGCATCTATAACCCAGAGGTGTCTAGGCTGGTGTGGGCAGTGCGGGGCCTAGAGGTTTCACGTGGTCAGCCTCT…
Equus_caballus_papillomavirus_8_strain_NCSU_complete_genome_KU963288.1	8155	6130	6765	NODE_142_length_1652_cov_2.527619	640	2	651	65.131	2.82e-21	CAGCATCTGTACCTGCCGCCGCCGCCTGTTACTAAGGTGCTCAGCACGGATGACTATGTTGTCAGACACTCCATATTTTATCATGGCAACAGTGAGCGCTTGCTTACAGTGGGCCATCCCTATTTTGCACTTAAGGATGGGGGTAAAAAACTGGATGTTCCTAAGGTGTCCCCAAATCAGTATAGGGTGTTTGAGGTGGTTTTGCCAAACCCCAACAAATTTGCCTTAGCTGACCCTAG-CA-TCTATAACCCAG-AGGTGTCTAGGCTGGTGTGGGCAGTGCGGGGCCTAGAGGTTTCACGTGGTCAGCCTCTTGGTGTGGGTCTTTCAGGTAACCCTAACTTTAACCGCCTGTTAGATGTGGAGAGCCCAAGTAAGGCACAGGACAACGGGGCAGAT…
Equus_caballus_papillomavirus_8_strain_NCSU_complete_genome_NC_031756.1	8155	6130	6765	NODE_142_length_1652_cov_2.527619	640	2	651	65.131	2.82e-21	CAGCATCTGTACCTGCCGCCGCCGCCTGTTACTAAGGTGCTCAGCACGGATGACTATGTTGTCAGACACTCCATATTTTATCATGGCAACAGTGAGCGCTTGCTTACAGTGGGCCATCCCTATTTTGCACTTAAGGATGGGGGTAAAAAACTGGATGTTCCTAAGGTGTCCCCAAATCAGTATAGGGTGTTTGAGGTGGTTTTGCCAAACCCCAACAAATTTGCCTTAGCTGACCCTAG-CA-TCTATAACCCAG-AGGTGTCTAGGCTGGTGTGGGCAGTGCGGGGCCTAGAGGTTTCACGTGGTCAGCCTCTTGGTGTGGGTCTTTCAGGTAACCCTAACTTTAACCGCCTGTTAGATGTGGAGAGCCCAAGTAAGGCACAGGACAACGGGGCAGAT…
Equus_ferus_caballus_papillomavirus_type_4_complete_genome_NC_020085.1	7554	5410	6046	NODE_142_length_1652_cov_2.527619	677	41	648	67.438	7.99e-47	TCCTGTTTTCCAGATGGCATTGTGGAC-CAAGAATATGCAGCATCTGTACCTGCCGCCGCCGCCTGTTACTAAGGTGCTCAGCACGGATGACTATGTTGTCAGACACTCCATATTTTATCATGGCAACAGTGAGCGCTTGCTTACAGTGGGCCATCCCTATTTTGCACTTAAGGATGGGGGTAAAAAACTGGATGTTCCTAAGGTGTCCCCAAATCAGTATAGGGTGTTTGAGGTGGTTTTGCCAAACCCCAACAAATTTGCCTTAGCTGACCCTAGCATCTATAACCCAGAGGTGTCTAGGCTGGTGTGGGCAGTGCGGGGCCTAGAGGTTTCACGTGGTCAGCCTCTTGGTGTGGGTCTTTCA--GGTAACCCTAACTTTAACCGCCTGTTAGATGT…
Equus_ferus_caballus_papillomavirus_type_4_complete_genome_JQ031032.1	7554	5410	6046	NODE_142_length_1652_cov_2.527619	677	41	648	67.438	7.99e-47	TCCTGTTTTCCAGATGGCATTGTGGAC-CAAGAATATGCAGCATCTGTACCTGCCGCCGCCGCCTGTTACTAAGGTGCTCAGCACGGATGACTATGTTGTCAGACACTCCATATTTTATCATGGCAACAGTGAGCGCTTGCTTACAGTGGGCCATCCCTATTTTGCACTTAAGGATGGGGGTAAAAAACTGGATGTTCCTAAGGTGTCCCCAAATCAGTATAGGGTGTTTGAGGTGGTTTTGCCAAACCCCAACAAATTTGCCTTAGCTGACCCTAGCATCTATAACCCAGAGGTGTCTAGGCTGGTGTGGGCAGTGCGGGGCCTAGAGGTTTCACGTGGTCAGCCTCTTGGTGTGGGTCTTTCA--GGTAACCCTAACTTTAACCGCCTGTTAGATGT…
Equus_caballus_papillomavirus_8_strain_NCSU_complete_genome_KU963288.1	8155	1740	2359	NODE_10_length_5103_cov_2.636689	2426	1807	630	64.444	4.78e-12	GACATGGTGCAGTGGGCCTATGACAACCACGTCACAGAGGAAAGTCAG-ATAGCATATGGGTACGCTAGCCTAGCGGACACTAATGCCAATGCTGCAGCATTTCTGGCCTGCGCGTCTCAAGCTAAGTATGTGCGAGA-TGTGGCCACGATGGTCAAATATTACCGCAGAGCGGAGATGCAGAACATGTCAATATCTGAATGGATTCACAGGCAGGCAGAGAGA-ATAGAGGGGGAGGGCGATTGGCGGCCCATCATAAACTTTCTGAAGCACCAGGGTGTTGA---AATCTCGGTGTTCATTAACAACCTGAAGCAGTTTGTTAAGGGGGTCCCCAAAAAAAATTGCATGGTGCTCGTGGGGCCACCAAACACTGGCAAGTCCA-GCTTTGCTGTGAG…
Equus_caballus_papillomavirus_8_strain_NCSU_complete_genome_NC_031756.1	8155	1740	2359	NODE_10_length_5103_cov_2.636689	2426	1807	630	64.444	4.78e-12	GACATGGTGCAGTGGGCCTATGACAACCACGTCACAGAGGAAAGTCAG-ATAGCATATGGGTACGCTAGCCTAGCGGACACTAATGCCAATGCTGCAGCATTTCTGGCCTGCGCGTCTCAAGCTAAGTATGTGCGAGA-TGTGGCCACGATGGTCAAATATTACCGCAGAGCGGAGATGCAGAACATGTCAATATCTGAATGGATTCACAGGCAGGCAGAGAGA-ATAGAGGGGGAGGGCGATTGGCGGCCCATCATAAACTTTCTGAAGCACCAGGGTGTTGA---AATCTCGGTGTTCATTAACAACCTGAAGCAGTTTGTTAAGGGGGTCCCCAAAAAAAATTGCATGGTGCTCGTGGGGCCACCAAACACTGGCAAGTCCA-GCTTTGCTGTGAG…
Equus_caballus_papillomavirus_9_strain_complete_genome_SW_MN117918.1	7656	4841	5433	NODE_57_length_2540_cov_2.874137	2540	1948	604	65.232	1.91e-29	TGGGTACCAGCCTGTGGGGCGCGGGGTTGC---TCAGGGGGGCGGCAGTGTCCGCGTGGGCACCCCCGTGTCTGTGCTGGAGCCCGGTGTAGGAGTGGAGACGGTGGGACCAAAGGACCTGGTGCCAGTGGACGCCTTGGGGCCCACCACTCCGTCTGTGGTGCCCCTGGGTGAGGGCGATGCCCTGGCG------CCAGGCGTGGAAATCTCTGCGGAGGTGCACCCCACGTTTGACCCCACAGCGGCTGGTGGTGCAGGAGGGGTGTCCTCCTCCGGGGGCGAGGCTGCGGTGCTCGAGGTCCCCCCTCAGGTGCAGCCAAGGCCGAGAGGCGGGGTTAGCCGCAGTCAATTCCACAACCCTGCTTTTCAGGTAGAGCTGCTGAGCTCCGCCTCCAC…
Equus_ferus_caballus_papillomavirus_type_7_complete_genome_JX035935.1	7619	2014	2589	NODE_44_length_2765_cov_2.798363	2513	1944	585	63.932	3.01e-14	AAGCACTTTCTGAAAGGCGTCCCCAAAAAAAGCTGCTTAGCAATATTTGGGGAGCCTGACACAGGGAAGTCCACATTTTGCTACAGCCTTATTAACTTTCTAAAGGGCAAAGTACTGTCCTTTGC--ATGCTCCAGAAGTCACTTCTGGCTT-AGTCCCCTAGCAGACTG-TCGGGTCGCCCTGGTGGATGATGCAAC-AGGGCCTGTCTGGGAGTACTTTGACCTGTACCTCAGAAATGCCCTTGATGGGAATCCCATCTTCGTGGACCTTAAGCACAGAGCACCCTTGCAGTTGAGGTGCCCCCCCATACTAGTCACCTCAAACATAGATGTGCGGAGGCAGGACAAATATCGGTACCTATACAGCAGGAT----GGCCTGCTTCACCTTTGACAAC…
Equus_ferus_caballus_papillomavirus_type_7_complete_genome_NC_020501.1	7619	2014	2589	NODE_44_length_2765_cov_2.798363	2513	1944	585	63.932	3.01e-14	AAGCACTTTCTGAAAGGCGTCCCCAAAAAAAGCTGCTTAGCAATATTTGGGGAGCCTGACACAGGGAAGTCCACATTTTGCTACAGCCTTATTAACTTTCTAAAGGGCAAAGTACTGTCCTTTGC--ATGCTCCAGAAGTCACTTCTGGCTT-AGTCCCCTAGCAGACTG-TCGGGTCGCCCTGGTGGATGATGCAAC-AGGGCCTGTCTGGGAGTACTTTGACCTGTACCTCAGAAATGCCCTTGATGGGAATCCCATCTTCGTGGACCTTAAGCACAGAGCACCCTTGCAGTTGAGGTGCCCCCCCATACTAGTCACCTCAAACATAGATGTGCGGAGGCAGGACAAATATCGGTACCTATACAGCAGGAT----GGCCTGCTTCACCTTTGACAAC…
Equus_caballus_papillomavirus_9_strain_complete_genome_SW_MN117918.1	7656	7087	7656	NODE_59_length_2527_cov_3.244898	1	570	570	100	0	CTGCAGCGCGCACAGGGCCTAAATAATGGCGTCTGCTGGCATGACAAGCTTTATGTTACAGTGTTTGACAATACTAGGGGCACCAACTTTACTATATCTGTAAAGAAGCAGGCGGCTGGTGGTGATCAGTATGATCCTAAGAACTATCATGTGTACCTCAGGCATGTAGAGGAGTTTGAACTATCTTTTATTTTTGAGCTTTGCAGCGTGCCACTGACCCCGGAGACCATGGCGCACCTGCACACTATGGACCCCACCATATTAGAGGACTGGGAGATAGGCATTAACCCCCCTGTTTCATCCCAGCTTGAGACCACGTACAGGTTTATTGCCTCCTCAGCCACCCGCTGCAACCGCCCTCCAGCCCCCCCCCTCGAGCCTTCTAAAGGCACCTTCTGG…
Equus_ferus_caballus_papillomavirus_type_7_complete_genome_JX035935.1	7619	2012	2529	NODE_10_length_5103_cov_2.636689	2122	1604	527	63.757	2.82e-08	TGAAGCAGTTTGTTAAGGGGGTCCCCAAAAAAAATTGCATGGTGCTCGTGGGGCCACCAAACACTGGCAAGTCCAGCTTTGCTGTGAGCTTGCTGGAGTTTATGAACGGGAAGGTCCTCTTCTTCCCAAACAGCAAGAGCCATTTCTGGCTAATGCCTCTTGCAG-ACACCAGAATGGCGCTGCTGGACGATGCCAC-AGGGCCTGTGTGGGATTTCTTTGACCATTACATGCGCAATGCCATGGATGGCAACCCCATTTCTGTGGACCAGAAGCATAAGCAGCCTCTGCAGCTAAGATGCCCCCCTCTGTTGATGACCACAAACG---TGGACATCAGCCAGGAGTCGAAGTATTGGTACCTGCACAGTCGCATGA---TTGTGCTTAGATTCCCCAA…
Equus_ferus_caballus_papillomavirus_type_7_complete_genome_NC_020501.1	7619	2012	2529	NODE_10_length_5103_cov_2.636689	2122	1604	527	63.757	2.82e-08	TGAAGCAGTTTGTTAAGGGGGTCCCCAAAAAAAATTGCATGGTGCTCGTGGGGCCACCAAACACTGGCAAGTCCAGCTTTGCTGTGAGCTTGCTGGAGTTTATGAACGGGAAGGTCCTCTTCTTCCCAAACAGCAAGAGCCATTTCTGGCTAATGCCTCTTGCAG-ACACCAGAATGGCGCTGCTGGACGATGCCAC-AGGGCCTGTGTGGGATTTCTTTGACCATTACATGCGCAATGCCATGGATGGCAACCCCATTTCTGTGGACCAGAAGCATAAGCAGCCTCTGCAGCTAAGATGCCCCCCTCTGTTGATGACCACAAACG---TGGACATCAGCCAGGAGTCGAAGTATTGGTACCTGCACAGTCGCATGA---TTGTGCTTAGATTCCCCAA…
Equus_caballus_papillomavirus_2_isolate_XJ-ks1391_complete_genome_MW410986.1	7802	4182	4668	NODE_44_length_2765_cov_2.798363	496	4	496	68.952	1.59e-49	CGCTGCCTGCAAAGCGCCGCCGCAGGGCGGCGGTAGAGGACCTTTACAAACAGTGCATAATGGGTGCTGATTGCCCGCCCGATGTGAGACCCCGAGTGGAAGGGGACACATTGGCTGACCGGATTTTGAAATGGGTCAGCTCATTTCTGTATTTGGGCAATTTAGGCATCAGCACCGGACGCGGTGGCACAGGAGGCACACTTGGATACCGGCCTTTGGGACGAGGCGTTGCAAGTGAAGGGGGGGGGAGTGTCCGCGTTGGCACCCCCGTTTCTGCGATTGAGCCTGGCCTGGCGCCAGGCACGGTGGGCCCCTCAGAGATAGTTCCTGTAGACACATTGCTTCCTACCACCCCCTCTGTGGTTCCTGTTGGGGAGGGGGAGGC---GGGGTTCATTC…
Equine_papillomavirus_2_isolate_Zurich_2009_HM461973.1_complete_genome	7803	4183	4669	NODE_44_length_2765_cov_2.798363	496	4	496	68.548	8.25e-47	CGCTGCCTGCAAAGCGCCGCCGCAGGGCGGCGGTAGAGGACCTTTACAAACAGTGCATAATGGGTGCTGATTGCCCGCCCGATGTGAGACCCCGAGTGGAAGGGGACACATTGGCTGACCGGATTTTGAAATGGGTCAGCTCATTTCTGTATTTGGGCAATTTAGGCATCAGCACCGGACGCGGTGGCACAGGAGGCACACTTGGATACCGGCCTTTGGGACGAGGCGTTGCAAGTGAAGGGGGGGGGAGTGTCCGCGTTGGCACCCCCGTTTCTGCGATTGAGCCTGGCCTGGCGCCAGGCACGGTGGGCCCCTCAGAGATAGTTCCTGTAGACACATTGCTTCCTACCACCCCCTCTGTGGTTCCTGTTGGGGAGGGGGAGGC---GGGGTTCATTC…
Equine_papillomavirus_2_complete_genome_EU503122.1	7802	4182	4668	NODE_44_length_2765_cov_2.798363	496	4	496	68.952	1.59e-49	CGCTGCCTGCAAAGCGCCGCCGCAGGGCGGCGGTAGAGGACCTTTACAAACAGTGCATAATGGGTGCTGATTGCCCGCCCGATGTGAGACCCCGAGTGGAAGGGGACACATTGGCTGACCGGATTTTGAAATGGGTCAGCTCATTTCTGTATTTGGGCAATTTAGGCATCAGCACCGGACGCGGTGGCACAGGAGGCACACTTGGATACCGGCCTTTGGGACGAGGCGTTGCAAGTGAAGGGGGGGGGAGTGTCCGCGTTGGCACCCCCGTTTCTGCGATTGAGCCTGGCCTGGCGCCAGGCACGGTGGGCCCCTCAGAGATAGTTCCTGTAGACACATTGCTTCCTACCACCCCCTCTGTGGTTCCTGTTGGGGAGGGGGAGGC---GGGGTTCATTC…
Equine_papillomavirus_2_complete_genome_NC_012123.1	7802	4182	4668	NODE_44_length_2765_cov_2.798363	496	4	496	68.952	1.59e-49	CGCTGCCTGCAAAGCGCCGCCGCAGGGCGGCGGTAGAGGACCTTTACAAACAGTGCATAATGGGTGCTGATTGCCCGCCCGATGTGAGACCCCGAGTGGAAGGGGACACATTGGCTGACCGGATTTTGAAATGGGTCAGCTCATTTCTGTATTTGGGCAATTTAGGCATCAGCACCGGACGCGGTGGCACAGGAGGCACACTTGGATACCGGCCTTTGGGACGAGGCGTTGCAAGTGAAGGGGGGGGGAGTGTCCGCGTTGGCACCCCCGTTTCTGCGATTGAGCCTGGCCTGGCGCCAGGCACGGTGGGCCCCTCAGAGATAGTTCCTGTAGACACATTGCTTCCTACCACCCCCTCTGTGGTTCCTGTTGGGGAGGGGGAGGC---GGGGTTCATTC…
Equus_ferus_caballus_papillomavirus_type_5_complete_genome_JQ031033.1	7519	2121	2576	NODE_10_length_5103_cov_2.636689	1982	1533	461	67.896	2.43e-34	CATTTCTGGCTAATGCCTCTTGCAGACACCAGAATGGCGCTGCTGGACGATGCCACAGGGCCTGTGTGGGATTTCTTTGACCATTACATGCGCAATGCCATGGATGGCAACCCCATTTCTGTGGACCAGAAGCATA-AGCAGCCTCTGCAGCTAAGATGCCCCCCTCTGTTGATGACCACAAACGTGGACAT---CAGCCAGGAGTCGAAGTATTGGTACCTGCACAGTCGCATGAT-TGTGCTTAGATTCCCCAACCCCTTCCCTCTTGATGAAAACCAGCAGCCCGTATTTGAATTAACTGTGAAAAATTGGAAATCTCTTTTTAAAAGGTTGTGGCAACGCTTAGAATTGAGTGACCAGGAGGACGAG------GGAGACGATGGAGAACCTACAC…
Equus_ferus_caballus_papillomavirus_type_5_complete_genome_NC_020084.1	7519	2121	2576	NODE_10_length_5103_cov_2.636689	1982	1533	461	67.896	2.43e-34	CATTTCTGGCTAATGCCTCTTGCAGACACCAGAATGGCGCTGCTGGACGATGCCACAGGGCCTGTGTGGGATTTCTTTGACCATTACATGCGCAATGCCATGGATGGCAACCCCATTTCTGTGGACCAGAAGCATA-AGCAGCCTCTGCAGCTAAGATGCCCCCCTCTGTTGATGACCACAAACGTGGACAT---CAGCCAGGAGTCGAAGTATTGGTACCTGCACAGTCGCATGAT-TGTGCTTAGATTCCCCAACCCCTTCCCTCTTGATGAAAACCAGCAGCCCGTATTTGAATTAACTGTGAAAAATTGGAAATCTCTTTTTAAAAGGTTGTGGCAACGCTTAGAATTGAGTGACCAGGAGGACGAG------GGAGACGATGGAGAACCTACAC…
Equus_caballus_papillomavirus_9_strain_complete_genome_SW_MN117918.1	7656	1964	2394	NODE_3380_length_431_cov_1.542373	431	1	431	99.304	0	GTGCGTGAGGCGCACTATGAAAGTGCCAAGGAGCTGCTACAGCCGCATTGCGACTATCTGCAGACCACCTACAGACCCCACCCGCGAGGGGCCATCTGCTTAATGCTATTGTGCTTTAAACATCACAAGAACAGAGATACAGTGGCCCGCCTGTTGCAGAGTATGCTTAATGTGAATTGTTTACACATCATGCTGCAGCCGCCGCGCACCAGGAGCGTGCCTGTGGCGCTGTTCTTTTATAAAACTGGGCTGGGAAACACGACCACCGTGTTTGGCAAGCCCCCGGAATGGATGGCGAGGCAAACACTGCTGCAGCACCAAACAGAAGATGCTATGAAATTTGATATGTCACAAATGGTGCAGTGGGCCTATGACAATAACTACATGGACGAAATCACA…
Equus_ferus_caballus_papillomavirus_type_5_complete_genome_JQ031033.1	7519	5398	5812	NODE_142_length_1652_cov_2.527619	678	258	424	66.509	5.02e-24	TTCCTGTTTTCCAGATGGCATTGTGGACCAAGAATATGCAGCATCTGTACCTGCCGCCGCCGCCTGTTACTAAGGTGCTCAGCACGGATGACTATGTTGTCAGACACTCCATATTTTATCATGGCAACAGTGAGCGCTTGCTTACAGTGGGCCATCCCTATTTTGCACTTAAGGATGGGGGTAAAAAACTGGATGTTCCTAAGGTGTCCCCAAATCAGTATAGGGTGTTTGAGGTGGTTTTGCCAAACCCCAACAAATTTGC-CTT--AGCTGACCCTAGCATCTATAACCCAGAGGTGTCTAGGCTGGTGTGGGCAGTGCGGGGCCTAGAGGTTTCACGTGGTCAGCCTCTTGGTGTGGGTCTTTCAGGTAACCCTAACTTTAACCGCCTGTTAGATG…
Equus_ferus_caballus_papillomavirus_type_5_complete_genome_NC_020084.1	7519	5398	5812	NODE_142_length_1652_cov_2.527619	678	258	424	66.509	5.02e-24	TTCCTGTTTTCCAGATGGCATTGTGGACCAAGAATATGCAGCATCTGTACCTGCCGCCGCCGCCTGTTACTAAGGTGCTCAGCACGGATGACTATGTTGTCAGACACTCCATATTTTATCATGGCAACAGTGAGCGCTTGCTTACAGTGGGCCATCCCTATTTTGCACTTAAGGATGGGGGTAAAAAACTGGATGTTCCTAAGGTGTCCCCAAATCAGTATAGGGTGTTTGAGGTGGTTTTGCCAAACCCCAACAAATTTGC-CTT--AGCTGACCCTAGCATCTATAACCCAGAGGTGTCTAGGCTGGTGTGGGCAGTGCGGGGCCTAGAGGTTTCACGTGGTCAGCCTCTTGGTGTGGGTCTTTCAGGTAACCCTAACTTTAACCGCCTGTTAGATG…
Equus_ferus_caballus_papillomavirus_type_5_complete_genome_JQ031033.1	7519	2164	2571	NODE_44_length_2765_cov_2.798363	2332	1931	411	67.397	9.7e-27	TGGATGATGCAACAGGGCCTGTCTGGGAGTACTTTGACCTGTACCTCAGAAATGCCCTTGATGGGAATCCCATCTTCGTGGACCTTAAGCACAGAGCACCCTTGCAGTTGAGGTGCCCCCCCATACTAGTCACCTCAAACATAGATGTGCGGAGGCAGGACAAATATCGGTACCTATACAGCAGGATGGCCTGCTTCACCTTTGACAACCCCTATCCCCTGGATGAAAATGGAGAACCTGTATTTCCCCTAACTGTTGAACATTGGGCCTCTTTCTTTACAAGGTGGTGGAAACGCCTAGATCT----CAG--TGAACCAGAGGACGAAGGGGAAGATGGAGAGGCTA--CGGAAAGCTTTAGATGCTGTTCTAGAAGAGCAGATG-CTTCTCTATGAG…
Equus_ferus_caballus_papillomavirus_type_5_complete_genome_NC_020084.1	7519	2164	2571	NODE_44_length_2765_cov_2.798363	2332	1931	411	67.397	9.7e-27	TGGATGATGCAACAGGGCCTGTCTGGGAGTACTTTGACCTGTACCTCAGAAATGCCCTTGATGGGAATCCCATCTTCGTGGACCTTAAGCACAGAGCACCCTTGCAGTTGAGGTGCCCCCCCATACTAGTCACCTCAAACATAGATGTGCGGAGGCAGGACAAATATCGGTACCTATACAGCAGGATGGCCTGCTTCACCTTTGACAACCCCTATCCCCTGGATGAAAATGGAGAACCTGTATTTCCCCTAACTGTTGAACATTGGGCCTCTTTCTTTACAAGGTGGTGGAAACGCCTAGATCT----CAG--TGAACCAGAGGACGAAGGGGAAGATGGAGAGGCTA--CGGAAAGCTTTAGATGCTGTTCTAGAAGAGCAGATG-CTTCTCTATGAG…
Equine_papillomavirus_3_isolate_Haflinger_GU384895.1_complete_genome	7582	5280	5663	NODE_142_length_1652_cov_2.527619	692	312	390	66.41	7.04e-16	AAACGGAGGTATGCTTCCTGTTTTCCAGATGGCATTGTGGACCAAGAATATGCAGCATCTGTACCTGCCGCCGCCGCCTGTTACTAAGGTGC-TCAGCACGGATGACTATGTTGTCAGACACTC-CATATTTTATCATGGCAACAGTGAGCGCTTGCTTACAGTGGGCCATCCCTATTTT--GCA--CTTAAGGATGG---GGGTAAAAAACTGGATGTTCCTAAGGTGTCCCCAAATCAGTATAGGGTGTTTGAGGTGGTTTTGCCAAACCCCAACAAATTTGCCTTAGCTGACCCTAGCATCTATAACCCAGAGGTGTCTAGGCTGGTGTGGGCAGTGCGGGGCCTAGAGGTTTCACGTGGTCAGCCTCTTGGTGTGGGTCTTTCAGG
Equine_papillomavirus_3_complete_genome_NC_017862.1	7582	5280	5663	NODE_142_length_1652_cov_2.527619	692	312	390	66.41	7.04e-16	AAACGGAGGTATGCTTCCTGTTTTCCAGATGGCATTGTGGACCAAGAATATGCAGCATCTGTACCTGCCGCCGCCGCCTGTTACTAAGGTGC-TCAGCACGGATGACTATGTTGTCAGACACTC-CATATTTTATCATGGCAACAGTGAGCGCTTGCTTACAGTGGGCCATCCCTATTTT--GCA--CTTAAGGATGG---GGGTAAAAAACTGGATGTTCCTAAGGTGTCCCCAAATCAGTATAGGGTGTTTGAGGTGGTTTTGCCAAACCCCAACAAATTTGCCTTAGCTGACCCTAGCATCTATAACCCAGAGGTGTCTAGGCTGGTGTGGGCAGTGCGGGGCCTAGAGGTTTCACGTGGTCAGCCTCTTGGTGTGGGTCTTTCAGG
Equus_caballus_papillomavirus_2_isolate_XJ-ks1391_complete_genome_MW410986.1	7802	6925	7290	NODE_10_length_5103_cov_2.636689	5103	4738	366	99.454	0	ATACATATAGGTTTATTACATCCTCTGCAACCAAATGCCCTCGCCCTGTCGTCCCTGACCCCCAGCCCGCTAAGCTAACCTTTTGGCAGATTGACCTGCAGGAAAGGCTGTCCCTTGACTTGGATCAGTTTACTCTGGGGCGTCGTTTTCTCGCTCAGAGTGGCTTGTCCAGGAGAGGGGTTAGCCGCAAGCGTCCAGCACCTTCGACCACCAGATCTAAGCGCCCCACCAAGAAAAGGAAGGCATAAGCAAACCCCCACCCAGGCGTTCTTCCTTGTTTTTTATCTTGCAATAAAGCCACTGATTAACCAGATGTGTCATGTCTTTCTGCACCGCGCCCGCTGGTGGCATGCACGCACCCAATGA
Equine_papillomavirus_2_isolate_Zurich_2009_HM461973.1_complete_genome	7803	6926	7291	NODE_10_length_5103_cov_2.636689	5103	4738	366	99.18	0	ATACATATAGGTTTATTACATCCTCTGCAACCAAATGCCCTCGCCCTGTCGTCCCTGACCCCCAGCCCGCTAAGCTAACCTTTTGGCAGATTGACCTGCAGGAAAGGCTGTCCCTTGACTTGGATCAGTTTACTCTGGGGCGTCGTTTTCTCGCTCAGAGTGGCTTGTCCAGGAGAGGGGTTAGCCGCAAGCGTCCAGCACCTTCGACCACCAGATCTAAGCGCCCCACCAAGAAAAGGAAGGCATAAGCAAACCCCCACCCAGGCGTTCTTCCTTGTTTTTTATCTTGCAATAAAGCCACTGATTAACCAGATGTGTCATGTCTTTCTGCACCGCGCCCGCTGGTGGCATGCACGCACCCAATGA
Equine_papillomavirus_2_complete_genome_EU503122.1	7802	6925	7290	NODE_10_length_5103_cov_2.636689	5103	4738	366	99.454	0	ATACATATAGGTTTATTACATCCTCTGCAACCAAATGCCCTCGCCCTGTCGTCCCTGACCCCCAGCCCGCTAAGCTAACCTTTTGGCAGATTGACCTGCAGGAAAGGCTGTCCCTTGACTTGGATCAGTTTACTCTGGGGCGTCGTTTTCTCGCTCAGAGTGGCTTGTCCAGGAGAGGGGTTAGCCGCAAGCGTCCAGCACCTTCGACCACCAGATCTAAGCGCCCCACCAAGAAAAGGAAGGCATAAGCAAACCCCCACCCAGGCGTTCTTCCTTGTTTTTTATCTTGCAATAAAGCCACTGATTAACCAGATGTGTCATGTCTTTCTGCACCGCGCCCGCTGGTGGCATGCACGCACCCAATGA
Equine_papillomavirus_2_complete_genome_NC_012123.1	7802	6925	7290	NODE_10_length_5103_cov_2.636689	5103	4738	366	99.454	0	ATACATATAGGTTTATTACATCCTCTGCAACCAAATGCCCTCGCCCTGTCGTCCCTGACCCCCAGCCCGCTAAGCTAACCTTTTGGCAGATTGACCTGCAGGAAAGGCTGTCCCTTGACTTGGATCAGTTTACTCTGGGGCGTCGTTTTCTCGCTCAGAGTGGCTTGTCCAGGAGAGGGGTTAGCCGCAAGCGTCCAGCACCTTCGACCACCAGATCTAAGCGCCCCACCAAGAAAAGGAAGGCATAAGCAAACCCCCACCCAGGCGTTCTTCCTTGTTTTTTATCTTGCAATAAAGCCACTGATTAACCAGATGTGTCATGTCTTTCTGCACCGCGCCCGCTGGTGGCATGCACGCACCCAATGA
Equus_caballus_papillomavirus_2_isolate_XJ-ks1391_complete_genome_MW410986.1	7802	7438	7802	NODE_10_length_5103_cov_2.636689	4738	4374	365	99.178	0	ACTTAATCCTTCAAAGCATCATACGCGGTAAGTCTTTGTTCTACTTTGTTGATTCTTGCCTTGAGTTAATCCTTTAAAAGCATCTTTGGCGCTCGTTCTCTTGATCCACTTTGTTTGCTCTTGCCCTGGAATGTGCTGTCTTTGCAGAATGCACCGGGCGCGGTGCGTTGGCTTGCCAGCTCTGATGCTGTGCCAAATCTTAAAAGCGGGCGCGGTGCGGGGGCCTGCCAAGTCCGCTAATCCCCCTGACTAGTTAAAACAACGGTCCACCAATCCGCTAAGGTGGAGGTGTTTTAAAACCTGGCATGCATACAATGCCAAACCCTAACGGTTGGCAGCCCTCCCGGTTGGCGGGAAAAAGCTGA
Equine_papillomavirus_2_isolate_Zurich_2009_HM461973.1_complete_genome	7803	7439	7803	NODE_10_length_5103_cov_2.636689	4738	4374	365	98.356	2.35e-180	ACTTAATCCTTCAAAGCATCATACGCGGTAAGTCTTTGTTCTACTTTGTTGATTCTTGCCTTGAGTTAATCCTTTAAAAGCATCTTTGGCGCTCGTTCTCTTGATCCACTTTGTTTGCTCTTGCCCTGGAATGTGCTGTCTTTGCAGAATGCACCGGGCGCGGTGCGTTGGCTTGCCAGCTCTGATGCTGTGCCAAATCTTAAAAGCGGGCGCGGTGCGGGGGCCTGCCAAGTCCGCTAATCCCCCTGACTAGTTAAAACAACGGTCCACCAATCCGCTAAGGTGGAGGTGTTTTAAAACCTGGCATGCATACAATGCCAAACCCTAACGGTTGGCAGCCCTCCCGGTTGGCGGGAAAAAGCTGA
Equine_papillomavirus_2_complete_genome_EU503122.1	7802	7438	7802	NODE_10_length_5103_cov_2.636689	4738	4374	365	99.452	0	ACTTAATCCTTCAAAGCATCATACGCGGTAAGTCTTTGTTCTACTTTGTTGATTCTTGCCTTGAGTTAATCCTTTAAAAGCATCTTTGGCGCTCGTTCTCTTGATCCACTTTGTTTGCTCTTGCCCTGGAATGTGCTGTCTTTGCAGAATGCACCGGGCGCGGTGCGTTGGCTTGCCAGCTCTGATGCTGTGCCAAATCTTAAAAGCGGGCGCGGTGCGGGGGCCTGCCAAGTCCGCTAATCCCCCTGACTAGTTAAAACAACGGTCCACCAATCCGCTAAGGTGGAGGTGTTTTAAAACCTGGCATGCATACAATGCCAAACCCTAACGGTTGGCAGCCCTCCCGGTTGGCGGGAAAAAGCTGA
Equine_papillomavirus_2_complete_genome_NC_012123.1	7802	7438	7802	NODE_10_length_5103_cov_2.636689	4738	4374	365	99.452	0	ACTTAATCCTTCAAAGCATCATACGCGGTAAGTCTTTGTTCTACTTTGTTGATTCTTGCCTTGAGTTAATCCTTTAAAAGCATCTTTGGCGCTCGTTCTCTTGATCCACTTTGTTTGCTCTTGCCCTGGAATGTGCTGTCTTTGCAGAATGCACCGGGCGCGGTGCGTTGGCTTGCCAGCTCTGATGCTGTGCCAAATCTTAAAAGCGGGCGCGGTGCGGGGGCCTGCCAAGTCCGCTAATCCCCCTGACTAGTTAAAACAACGGTCCACCAATCCGCTAAGGTGGAGGTGTTTTAAAACCTGGCATGCATACAATGCCAAACCCTAACGGTTGGCAGCCCTCCCGGTTGGCGGGAAAAAGCTGA
Equine_papillomavirus_type_6_complete_genome_JQ965698.1	7551	5512	5858	NODE_142_length_1652_cov_2.527619	487	141	352	65.341	2.98e-14	GATGTTCCTAAGGTGTCCCCAAATCAGTATAGGGTGTTTGAGGTGGTTTTGCCAAACCCCAACAAATTTGCCTTAGCTGACCCTAGCATCTATAACCCAGAGGTGTCTAGGCTGGTGTGGGCAGTGCGGGGCCTAGAGGTTTCACGTGGTCAGCCTCTTGGTGTGGGTCTTTCAGGTAACCCTAACTTTAACCGCCTGTTAGATGTGGAGAGCCCAAGTAAGGCACAGGACAACG----GGGCAGAT-AATGACAAGCGTGTCAATATAGCTTTTGATGTCAAGCAAAGCCAGGTTCTTATTGTGGGCTGCACACCTGCAATAGGGGAGCACTGGAAGTTGGCTAAGGCCTG
Equine_papillomavirus_type_6_complete_genome_NC_020500.1	7551	5512	5858	NODE_142_length_1652_cov_2.527619	487	141	352	65.341	2.98e-14	GATGTTCCTAAGGTGTCCCCAAATCAGTATAGGGTGTTTGAGGTGGTTTTGCCAAACCCCAACAAATTTGCCTTAGCTGACCCTAGCATCTATAACCCAGAGGTGTCTAGGCTGGTGTGGGCAGTGCGGGGCCTAGAGGTTTCACGTGGTCAGCCTCTTGGTGTGGGTCTTTCAGGTAACCCTAACTTTAACCGCCTGTTAGATGTGGAGAGCCCAAGTAAGGCACAGGACAACG----GGGCAGAT-AATGACAAGCGTGTCAATATAGCTTTTGATGTCAAGCAAAGCCAGGTTCTTATTGTGGGCTGCACACCTGCAATAGGGGAGCACTGGAAGTTGGCTAAGGCCTG
Equine_papillomavirus_type_6_complete_genome_JQ965698.1	7551	5512	5849	NODE_57_length_2540_cov_2.874137	1074	734	342	63.743	0.002	GACGTTCCCAAGGTGTCCTCTAATCAGTACAGGGTGTTTGAGGTAGTTCTCCCAAATCCCAACAAATTTGCTCTTGCAGATCAGAACATTTACAACCCAGAGACCTCCAGACTTGTCTGGGCTCTCCGCGGTGTCGAGGTGTCACGGGGGCAGCCTCTGGGCATCGGGGTGACAGGAAGCACAGTGTTTAACAAGCTGTATGATGTAGAAAACCCAGGGAAACGACAGGAAGCTGCAGGGGAGCGCGAGGATAAGCGTGTTAATATGG-GCTTCGATGTGAAGCAGTCTCAGCTTTTGATGGTGGGCTGCAAGCCGGCCATCGGCGAGCACTGGACCAAGGC
Equine_papillomavirus_type_6_complete_genome_NC_020500.1	7551	5512	5849	NODE_57_length_2540_cov_2.874137	1074	734	342	63.743	0.002	GACGTTCCCAAGGTGTCCTCTAATCAGTACAGGGTGTTTGAGGTAGTTCTCCCAAATCCCAACAAATTTGCTCTTGCAGATCAGAACATTTACAACCCAGAGACCTCCAGACTTGTCTGGGCTCTCCGCGGTGTCGAGGTGTCACGGGGGCAGCCTCTGGGCATCGGGGTGACAGGAAGCACAGTGTTTAACAAGCTGTATGATGTAGAAAACCCAGGGAAACGACAGGAAGCTGCAGGGGAGCGCGAGGATAAGCGTGTTAATATGG-GCTTCGATGTGAAGCAGTCTCAGCTTTTGATGGTGGGCTGCAAGCCGGCCATCGGCGAGCACTGGACCAAGGC
Equine_papillomavirus_type_6_complete_genome_JQ965698.1	7551	2256	2565	NODE_10_length_5103_cov_2.636689	1880	1577	316	66.139	3.63e-13	GATGGCAACCCCATTTCTGTGGACCAGAAGCATAAGCAGCCTCTGCAGCTAAGATGCCCCCCTCTGTTGATGACCACAAACG---TGGA-CATC--AGCCAGGAGTCGAAGTATTGGTACCTGCACAGTCGCATGATTGTGCTTAGATTCCCCAACCCCTTCCCTCTTGATGAAAACCAGCAGCCCGTATTTGAATTAACTGTGAAAAATTGGAAATCTCTTTTTAAAAGGTTGTGGCAACGCTTAGAATTGAGTGACCAGGAGGACGAGGG------AGACGATGGAGAACCTACACAGGGCTTTAGATGCACTG
Equine_papillomavirus_type_6_complete_genome_NC_020500.1	7551	2256	2565	NODE_10_length_5103_cov_2.636689	1880	1577	316	66.139	3.63e-13	GATGGCAACCCCATTTCTGTGGACCAGAAGCATAAGCAGCCTCTGCAGCTAAGATGCCCCCCTCTGTTGATGACCACAAACG---TGGA-CATC--AGCCAGGAGTCGAAGTATTGGTACCTGCACAGTCGCATGATTGTGCTTAGATTCCCCAACCCCTTCCCTCTTGATGAAAACCAGCAGCCCGTATTTGAATTAACTGTGAAAAATTGGAAATCTCTTTTTAAAAGGTTGTGGCAACGCTTAGAATTGAGTGACCAGGAGGACGAGGG------AGACGATGGAGAACCTACACAGGGCTTTAGATGCACTG
Equus_ferus_caballus_papillomavirus_type_5_complete_genome_JQ031033.1	7519	6339	6634	NODE_59_length_2527_cov_3.244898	10	305	301	70.432	2.78e-27	GCACAGGGCCTAAATAATGGCGTCTGCTGGCATGACAAGCTTTATGTTACAGTGTTTGACAATACTAGGGGCACCAACTTTACTATATCTGTAAAGAAGCAGGCGG-CTGGTGGT-GATCAGTATGATCCTAAGA--ACTATC-ATGTGTACCTCAGGCATGTAGAGGAGTTTGAACTATCTTTTATTTTTGAGCTTTGCAGCGTGCCACTGACCCCGGAGACCATGGCGCACCTGCACACTATGGACCCCACCATATTAGAGGACTGGGAGATAGGCATTAACCCCCCTGTTTCATCCCA
Equus_ferus_caballus_papillomavirus_type_5_complete_genome_NC_020084.1	7519	6339	6634	NODE_59_length_2527_cov_3.244898	10	305	301	70.432	2.78e-27	GCACAGGGCCTAAATAATGGCGTCTGCTGGCATGACAAGCTTTATGTTACAGTGTTTGACAATACTAGGGGCACCAACTTTACTATATCTGTAAAGAAGCAGGCGG-CTGGTGGT-GATCAGTATGATCCTAAGA--ACTATC-ATGTGTACCTCAGGCATGTAGAGGAGTTTGAACTATCTTTTATTTTTGAGCTTTGCAGCGTGCCACTGACCCCGGAGACCATGGCGCACCTGCACACTATGGACCCCACCATATTAGAGGACTGGGAGATAGGCATTAACCCCCCTGTTTCATCCCA
Equus_ferus_caballus_papillomavirus_type_4_complete_genome_NC_020085.1	7554	2130	2427	NODE_44_length_2765_cov_2.798363	2339	2042	300	66.333	2.98e-14	GCCCTGGTGGATGATGCAACAGGGCCTGTCTGGGAGTACTTTGACCTGTACCTCAGAAATGCCCTTGATGGGAATCCCATCTTCGTGGACCTTAAGCACAGAGCACCCTTGCAGTTGAGGTGCCCCCCCATACTAGTCACCTCAAACATAGATGTGCGGAGGCAGGAC--AAATATCGGTACCTATACAGCAGGATGGCCTGCTTCACCTTTGACAACCCCTATCCCCTGGATGAAAATGGAGAACCTGTATTTCCCCTAACTGTTGAACATTGGGCCTCTTTCTTTACAAGGTGGTGGA
Equus_ferus_caballus_papillomavirus_type_4_complete_genome_JQ031032.1	7554	2130	2427	NODE_44_length_2765_cov_2.798363	2339	2042	300	66.333	2.98e-14	GCCCTGGTGGATGATGCAACAGGGCCTGTCTGGGAGTACTTTGACCTGTACCTCAGAAATGCCCTTGATGGGAATCCCATCTTCGTGGACCTTAAGCACAGAGCACCCTTGCAGTTGAGGTGCCCCCCCATACTAGTCACCTCAAACATAGATGTGCGGAGGCAGGAC--AAATATCGGTACCTATACAGCAGGATGGCCTGCTTCACCTTTGACAACCCCTATCCCCTGGATGAAAATGGAGAACCTGTATTTCCCCTAACTGTTGAACATTGGGCCTCTTTCTTTACAAGGTGGTGGA
Equus_caballus_papillomavirus_1_isolate_G2_complete_genome_MN164462.1	7611	5315	5608	NODE_57_length_2540_cov_2.874137	1150	860	296	66.216	8.06e-09	CTATCATGGTAACAGCGAGCGTATGCTCATGGTGGGCCACCCCTTCTTTGCCCTCAAAAATGACAGGGA-CAAGC--TGGACGTTCCCAAGGTGTCCTCTAATCAGTACAGGGTGTTTGAG-GTAGTTCTCCCAAATCCCAACAAATTTGCTCTTGCAGATCAGAACATTTACAACCCAGAGACCTCCAGACTTGTCTGGGCTCTCCGCGGTGTCGAGGTGTCACGGGGGCAGCCTCT-GGGCATCGGGGTGACAGGAAGCACAGTGTTTAACAAGCTGTATGATGTAGAAAACCC
Equus_caballus_papillomavirus_1_strain_150904_complete_genome_MF288893.1	7613	6177	6461	NODE_59_length_2527_cov_3.244898	10	294	287	66.202	1.56e-11	GCACAGGGCCTAAATAATGGCGTCTGCTGGCATGACAAGCTTTATGTTACAGTGTTTGACAATACTAGGGGCACCAACTTTACTATATCTGTAAAGAAGCAGGCG-GCTGGTG-GTGATCAGTATGATCCTAAGAACTATCATGTGTACCTCAGGCATGTAGAGGAGTTTGAACTATCTTTTATTTTTGAGCTTTGCAGCGTGCCACTGACCCCGGAGACCATGGCGCACCTGCACACTATGGACCCCACCATATTAGAGGACTGGGAGATAGGCATTAACCCCCCT
Equus_caballus_papillomavirus_1_isolate_G2_complete_genome_MN164462.1	7611	6174	6458	NODE_59_length_2527_cov_3.244898	10	294	287	65.854	6.62e-10	GCACAGGGCCTAAATAATGGCGTCTGCTGGCATGACAAGCTTTATGTTACAGTGTTTGACAATACTAGGGGCACCAACTTTACTATATCTGTAAAGAAGCAGGCG-GCTGGTG-GTGATCAGTATGATCCTAAGAACTATCATGTGTACCTCAGGCATGTAGAGGAGTTTGAACTATCTTTTATTTTTGAGCTTTGCAGCGTGCCACTGACCCCGGAGACCATGGCGCACCTGCACACTATGGACCCCACCATATTAGAGGACTGGGAGATAGGCATTAACCCCCCT
Equus_caballus_papillomavirus_type_1_complete_genome_AF498323.1	7610	6174	6458	NODE_59_length_2527_cov_3.244898	10	294	287	66.202	1.56e-11	GCACAGGGCCTAAATAATGGCGTCTGCTGGCATGACAAGCTTTATGTTACAGTGTTTGACAATACTAGGGGCACCAACTTTACTATATCTGTAAAGAAGCAGGCG-GCTGGTG-GTGATCAGTATGATCCTAAGAACTATCATGTGTACCTCAGGCATGTAGAGGAGTTTGAACTATCTTTTATTTTTGAGCTTTGCAGCGTGCCACTGACCCCGGAGACCATGGCGCACCTGCACACTATGGACCCCACCATATTAGAGGACTGGGAGATAGGCATTAACCCCCCT
Equus_caballus_papillomavirus_type_1_complete_genome_NC_003748.1	7610	6174	6458	NODE_59_length_2527_cov_3.244898	10	294	287	66.202	1.56e-11	GCACAGGGCCTAAATAATGGCGTCTGCTGGCATGACAAGCTTTATGTTACAGTGTTTGACAATACTAGGGGCACCAACTTTACTATATCTGTAAAGAAGCAGGCG-GCTGGTG-GTGATCAGTATGATCCTAAGAACTATCATGTGTACCTCAGGCATGTAGAGGAGTTTGAACTATCTTTTATTTTTGAGCTTTGCAGCGTGCCACTGACCCCGGAGACCATGGCGCACCTGCACACTATGGACCCCACCATATTAGAGGACTGGGAGATAGGCATTAACCCCCCT
Equine_papillomavirus_3_isolate_Haflinger_GU384895.1_complete_genome	7582	6235	6510	NODE_59_length_2527_cov_3.244898	1	285	286	69.231	4.16e-25	CTGCAGCGCGCACAGGGCCTAAATAATGGCGTCTGCTGGCATGACAAGCTTTATGTTACAGTGTTTGACAATACTAGGGGCACCAACTTTACTATATCTGTAAAGAAGCAGGCGGCTGGTGG-TGATCAGTATGATCCTAAGAACTATCATGTGTACCTCAGGCATGTAGAGGAGTTTGAACTATCTTTTATTTTTGAGCTTTGCAGCGTGCCACTGACCCCGGAGACCATGGCGCACCTGCACACTATGGACCCCACCATATTAGAGGACTGGGAGATAGGCATT
Equine_papillomavirus_3_complete_genome_NC_017862.1	7582	6235	6510	NODE_59_length_2527_cov_3.244898	1	285	286	69.231	4.16e-25	CTGCAGCGCGCACAGGGCCTAAATAATGGCGTCTGCTGGCATGACAAGCTTTATGTTACAGTGTTTGACAATACTAGGGGCACCAACTTTACTATATCTGTAAAGAAGCAGGCGGCTGGTGG-TGATCAGTATGATCCTAAGAACTATCATGTGTACCTCAGGCATGTAGAGGAGTTTGAACTATCTTTTATTTTTGAGCTTTGCAGCGTGCCACTGACCCCGGAGACCATGGCGCACCTGCACACTATGGACCCCACCATATTAGAGGACTGGGAGATAGGCATT
Equus_ferus_caballus_papillomavirus_type_4_complete_genome_NC_020085.1	7554	6359	6639	NODE_59_length_2527_cov_3.244898	10	290	285	70.877	1.54e-30	GCACAGGGCCTAAATAATGGCGTCTGCTGGCATGACAAGCTTTATGTTACAGTGTTTGACAATACTAGGGGCACCAACTTTACTATATCTGT----AAAGAAGCAGGCGGCTGGTGGTGATCAGTATGATCCTAAGAACTATCATGTGTACCTCAGGCATGTAGAGGAGTTTGAACTATCTTTTATTTTTGAGCTTTGCAGCGTGCCACTGACCCCGGAGACCATGGCGCACCTGCACACTATGGACCCCACCATATTAGAGGACTGGGAGATAGGCATTAACCC
Equus_ferus_caballus_papillomavirus_type_4_complete_genome_JQ031032.1	7554	6359	6639	NODE_59_length_2527_cov_3.244898	10	290	285	70.877	1.54e-30	GCACAGGGCCTAAATAATGGCGTCTGCTGGCATGACAAGCTTTATGTTACAGTGTTTGACAATACTAGGGGCACCAACTTTACTATATCTGT----AAAGAAGCAGGCGGCTGGTGGTGATCAGTATGATCCTAAGAACTATCATGTGTACCTCAGGCATGTAGAGGAGTTTGAACTATCTTTTATTTTTGAGCTTTGCAGCGTGCCACTGACCCCGGAGACCATGGCGCACCTGCACACTATGGACCCCACCATATTAGAGGACTGGGAGATAGGCATTAACCC
Equus_ferus_caballus_papillomavirus_type_7_complete_genome_JX035935.1	7619	6288	6562	NODE_59_length_2527_cov_3.244898	1	281	284	66.901	8.62e-15	CTGCAGCGCGCACAGGGCCTAAATAATGGCGTCTGCTGGCATGACAAGCTTTATGTTACAGTGTTTGACAATACTAGGGGCACCAACTTTACTATATCTG-TAAAG--AAGCAGGCGGCTGGTGGTGATCAGTATGATCCTAAGAACTATCATGTGTACCTCAGGCATGTAGAGGAGTTTGAACTATCTTTTATTTTTGAGCTTTGCAGCGTGCCACTGACCCCGGAGACCATGGCGCACCTGCACACTATGGACCCCACCATATTAGAGGACTGGGAGATAGG
Equus_ferus_caballus_papillomavirus_type_7_complete_genome_NC_020501.1	7619	6288	6562	NODE_59_length_2527_cov_3.244898	1	281	284	66.901	8.62e-15	CTGCAGCGCGCACAGGGCCTAAATAATGGCGTCTGCTGGCATGACAAGCTTTATGTTACAGTGTTTGACAATACTAGGGGCACCAACTTTACTATATCTG-TAAAG--AAGCAGGCGGCTGGTGGTGATCAGTATGATCCTAAGAACTATCATGTGTACCTCAGGCATGTAGAGGAGTTTGAACTATCTTTTATTTTTGAGCTTTGCAGCGTGCCACTGACCCCGGAGACCATGGCGCACCTGCACACTATGGACCCCACCATATTAGAGGACTGGGAGATAGG
Equus_caballus_papillomavirus_2_isolate_XJ-ks1391_complete_genome_MW410986.1	7802	6337	6609	NODE_10444_length_279_cov_1.217822	1	279	281	71.53	5.57e-30	TGGACCTGGTGGACACTACCTCCAAGTACCCTGACTACATACAAATGGGCCAGGAGACATCTGGAAACAGCATGTTTTTCTTTGCTCGCAGAGAGCAGATGTACACAAGGCATTTTATGGTTAGGGATGGGCTTTTAGAAAATGAAAAGG-TACCCAAGGAG-ATGTATGTTGCCCGTGCACAGGATGATGACAAGAAATCCCACAGGTATCAGTACACACACACACCCAGTGGGTCTCTGGTGTCCACTGATTCTCAGATTTTTAACAGGCCCTACTGGC
Equine_papillomavirus_2_isolate_Zurich_2009_HM461973.1_complete_genome	7803	6338	6610	NODE_10444_length_279_cov_1.217822	1	279	281	71.886	1.31e-31	TGGACCTGGTGGACACTACCTCCAAGTACCCTGACTACATACAAATGGGCCAGGAGACATCTGGAAACAGCATGTTTTTCTTTGCTCGCAGAGAGCAGATGTACACAAGGCATTTTATGGTTAGGGATGGGCTTTTAGAAAATGAAAAGG-TACCCAAGGAG-ATGTATGTTGCCCGTGCACAGGATGATGACAAGAAATCCCACAGGTATCAGTACACACACACACCCAGTGGGTCTCTGGTGTCCACTGATTCTCAGATTTTTAACAGGCCCTACTGGC
Equine_papillomavirus_2_complete_genome_EU503122.1	7802	6337	6609	NODE_10444_length_279_cov_1.217822	1	279	281	71.53	5.57e-30	TGGACCTGGTGGACACTACCTCCAAGTACCCTGACTACATACAAATGGGCCAGGAGACATCTGGAAACAGCATGTTTTTCTTTGCTCGCAGAGAGCAGATGTACACAAGGCATTTTATGGTTAGGGATGGGCTTTTAGAAAATGAAAAGG-TACCCAAGGAG-ATGTATGTTGCCCGTGCACAGGATGATGACAAGAAATCCCACAGGTATCAGTACACACACACACCCAGTGGGTCTCTGGTGTCCACTGATTCTCAGATTTTTAACAGGCCCTACTGGC
Equine_papillomavirus_2_complete_genome_NC_012123.1	7802	6337	6609	NODE_10444_length_279_cov_1.217822	1	279	281	71.53	5.57e-30	TGGACCTGGTGGACACTACCTCCAAGTACCCTGACTACATACAAATGGGCCAGGAGACATCTGGAAACAGCATGTTTTTCTTTGCTCGCAGAGAGCAGATGTACACAAGGCATTTTATGGTTAGGGATGGGCTTTTAGAAAATGAAAAGG-TACCCAAGGAG-ATGTATGTTGCCCGTGCACAGGATGATGACAAGAAATCCCACAGGTATCAGTACACACACACACCCAGTGGGTCTCTGGTGTCCACTGATTCTCAGATTTTTAACAGGCCCTACTGGC
Equine_papillomavirus_type_6_complete_genome_JQ965698.1	7551	6274	6547	NODE_59_length_2527_cov_3.244898	10	289	281	68.683	2.61e-21	GCACAGGGCCTAAATAATGGCGTCTGCTGGCATGACAAGCTTTATGTTAC-AGTGTTTGACAATACTAGGGGCACCAACTTTACTATATCTGTAAAGAAGCAGGCGGCTGGTGGTGATCAGTATGATCCTAAGAACTATCATGTGTACCTCAGGCATGTAGAGGAGTTTGAACTATCTTTTATTTTTGAGCTTTGCAGCGTGCCACTGACCCCGGAGACCATGGCGCACCTGCACACTATGGACCCCACCATATTAGAGGACTGGGAGATAGGCATTAACC
Equine_papillomavirus_type_6_complete_genome_NC_020500.1	7551	6274	6547	NODE_59_length_2527_cov_3.244898	10	289	281	68.683	2.61e-21	GCACAGGGCCTAAATAATGGCGTCTGCTGGCATGACAAGCTTTATGTTAC-AGTGTTTGACAATACTAGGGGCACCAACTTTACTATATCTGTAAAGAAGCAGGCGGCTGGTGGTGATCAGTATGATCCTAAGAACTATCATGTGTACCTCAGGCATGTAGAGGAGTTTGAACTATCTTTTATTTTTGAGCTTTGCAGCGTGCCACTGACCCCGGAGACCATGGCGCACCTGCACACTATGGACCCCACCATATTAGAGGACTGGGAGATAGGCATTAACC
Equus_caballus_papillomavirus_9_strain_complete_genome_SW_MN117918.1	7656	6809	7087	NODE_10444_length_279_cov_1.217822	1	279	279	100	8.06e-142	TGGACCTGGTGGACACTACCTCCAAGTACCCTGACTACATACAAATGGGCCAGGAGACATCTGGAAACAGCATGTTTTTCTTTGCTCGCAGAGAGCAGATGTACACAAGGCATTTTATGGTTAGGGATGGGCTTTTAGAAAATGAAAAGGTACCCAAGGAGATGTATGTTGCCCGTGCACAGGATGATGACAAGAAATCCCACAGGTATCAGTACACACACACACCCAGTGGGTCTCTGGTGTCCACTGATTCTCAGATTTTTAACAGGCCCTACTGGC
Equus_caballus_papillomavirus_8_strain_NCSU_complete_genome_KU963288.1	8155	7048	7307	NODE_59_length_2527_cov_3.244898	16	275	265	65.283	2.48e-09	GGCCTAAATAATGGCGTCTGCTGGCATGACAAGCTTTATGTTACAGTGTTTGACAATACTAGGGGCACCAACTTTACTATATCTGT-----AAAGAAGCAGGCGGCTGGTGGTGATCAGTATGATCCTAAGAACTATCATGTGTACCTCAGGCATGTAGAGGAGTTTGAACTATCTTTTATTTTTGAGCTTTGCAGCGTGCCACTGACCCCGGAGACCATGGCGCACCTGCACACTATGGACCCCACCATATTAGAGGACTGGGA
Equus_caballus_papillomavirus_8_strain_NCSU_complete_genome_NC_031756.1	8155	7048	7307	NODE_59_length_2527_cov_3.244898	16	275	265	65.283	2.48e-09	GGCCTAAATAATGGCGTCTGCTGGCATGACAAGCTTTATGTTACAGTGTTTGACAATACTAGGGGCACCAACTTTACTATATCTGT-----AAAGAAGCAGGCGGCTGGTGGTGATCAGTATGATCCTAAGAACTATCATGTGTACCTCAGGCATGTAGAGGAGTTTGAACTATCTTTTATTTTTGAGCTTTGCAGCGTGCCACTGACCCCGGAGACCATGGCGCACCTGCACACTATGGACCCCACCATATTAGAGGACTGGGA
Equus_ferus_caballus_papillomavirus_type_4_complete_genome_NC_020085.1	7554	3991	4239	NODE_44_length_2765_cov_2.798363	485	228	263	67.681	3.63e-13	AAGCGCCGCCGCAGGGCGGCGGTAGAGGACCTTTACAAACAG-TGCATAATGGGTGCTGATTGCCCGCCCGATGTGAGACCCCGAGTGGAAGGGGACACATTGGCTGACCGGATTTTGAAATGGGTCAGCTCATTTCTGTATTTGGGCAATTTAGGCATCAG---CACCGGACGCGGTGGCACAGGAGGCACACTTGGATACCGGCCTTTGGGACGAGGCGTTGCAAG-TGAAGGGGGGGGGAGTGTCCGCGTTGGCACCCCC
Equus_ferus_caballus_papillomavirus_type_4_complete_genome_JQ031032.1	7554	3991	4239	NODE_44_length_2765_cov_2.798363	485	228	263	67.681	3.63e-13	AAGCGCCGCCGCAGGGCGGCGGTAGAGGACCTTTACAAACAG-TGCATAATGGGTGCTGATTGCCCGCCCGATGTGAGACCCCGAGTGGAAGGGGACACATTGGCTGACCGGATTTTGAAATGGGTCAGCTCATTTCTGTATTTGGGCAATTTAGGCATCAG---CACCGGACGCGGTGGCACAGGAGGCACACTTGGATACCGGCCTTTGGGACGAGGCGTTGCAAG-TGAAGGGGGGGGGAGTGTCCGCGTTGGCACCCCC
Equus_caballus_papillomavirus_9_strain_complete_genome_SW_MN117918.1	7656	7402	7654	NODE_10_length_5103_cov_2.636689	5101	4858	255	71.373	8.11e-28	ACATATAGGTTTATTACATCCTCTGCAACCAAATGCCCTCGCCCTGTCGTCCCTGACCCCCAGCCCGCTAAGCTAACCTTTTGGCAGATTGACCTGCAGGAAAGGCTGTCCCTTGACTTGGATCAGTTTACTCTGGGGCGTCGTTTTCTCGCTCAGAGTGGCTTGTCCAGG-AGAGGGGTTAGC-CGCAAGCGTCCAGCACCTTCGACC---------ACCAGATCTAAGCGCCCCACCAAGAAAAGGAAGGCAT
Equus_caballus_papillomavirus_2_isolate_XJ-ks1391_complete_genome_MW410986.1	7802	1263	1507	NODE_59_length_2527_cov_3.244898	2216	2442	248	65.726	0.000636	CCACAAGTGAAGAGACGCCTGTTCGAGCCCCCTGCA---GACAACCTCAGGGGCTCCTG----CAGCTATGAAGCTAATTCTGTTTACATCAGGACGAGCACGCAGGTAG---------GGGGTGTGGAGGGTG--AGCGTCCGGCACTGCGGGAGATTCAAAATG-GCCAGACACCCATTC-GGC-CGCCGGTCTTGGACGTACTCCAAGCTGGTAACAGGCAGGCGGCTATGCTTGCGCGCTTTAA
Equine_papillomavirus_2_isolate_Zurich_2009_HM461973.1_complete_genome	7803	1264	1508	NODE_59_length_2527_cov_3.244898	2216	2442	248	65.726	0.000636	CCACAAGTGAAGAGACGCCTGTTCGAGCCCCCTGCA---GACAACCTCAGGGGCTCCTG----CAGCTATGAAGCTAATTCTGTTTACATCAGGACGAGCACGCAGGTAG---------GGGGTGTGGAGGGTG--AGCGTCCGGCACTGCGGGAGATTCAAAATG-GCCAGACACCCATTC-GGC-CGCCGGTCTTGGACGTACTCCAAGCTGGTAACAGGCAGGCGGCTATGCTTGCGCGCTTTAA
Equine_papillomavirus_2_complete_genome_EU503122.1	7802	1263	1507	NODE_59_length_2527_cov_3.244898	2216	2442	248	65.726	0.000636	CCACAAGTGAAGAGACGCCTGTTCGAGCCCCCTGCA---GACAACCTCAGGGGCTCCTG----CAGCTATGAAGCTAATTCTGTTTACATCAGGACGAGCACGCAGGTAG---------GGGGTGTGGAGGGTG--AGCGTCCGGCACTGCGGGAGATTCAAAATG-GCCAGACACCCATTC-GGC-CGCCGGTCTTGGACGTACTCCAAGCTGGTAACAGGCAGGCGGCTATGCTTGCGCGCTTTAA
Equine_papillomavirus_2_complete_genome_NC_012123.1	7802	1263	1507	NODE_59_length_2527_cov_3.244898	2216	2442	248	65.726	0.000636	CCACAAGTGAAGAGACGCCTGTTCGAGCCCCCTGCA---GACAACCTCAGGGGCTCCTG----CAGCTATGAAGCTAATTCTGTTTACATCAGGACGAGCACGCAGGTAG---------GGGGTGTGGAGGGTG--AGCGTCCGGCACTGCGGGAGATTCAAAATG-GCCAGACACCCATTC-GGC-CGCCGGTCTTGGACGTACTCCAAGCTGGTAACAGGCAGGCGGCTATGCTTGCGCGCTTTAA
Equus_caballus_papillomavirus_1_strain_150904_complete_genome_MF288893.1	7613	5313	5552	NODE_142_length_1652_cov_2.527619	568	332	246	69.106	1.28e-12	ATATTTTATCATGGCAACAGTGAGCGCTTGCTTACAGTGGGCCATCCCTATTTTGC-ACTTAAGGA-TGGGGGTAAA-AAAC--TGGATGTTCCTAAGGTGTCCCCAAATCAGTATAGGGTGTTTGAG-GTGGTTTTGCCAAACCCCAACAAATTTGCCTTAGCTGACCCTAGCA---TCTATAACCCAGAGGTGTCTAGGCTGGTGTGGGCAGTGCGGGGCCTAGAGGTTTCACGTGGTCAGCCT
Equus_caballus_papillomavirus_2_isolate_XJ-ks1391_complete_genome_MW410986.1	7802	951	1142	NODE_59_length_2527_cov_3.244898	1903	2095	199	68.844	2.89e-08	GGACGCTGACCCAGGTACAAGCCCCGGGGAGGGGTGCAGCGGAGCATGCTTCATTTTA---AGGGAGGCACAGTGCAGCGACCCTGATAGCGGGGATGA-TGAGGGAGACACCCCAGACAG--TCCAGGTGCCTATGATTTTGTAGATAACGCCTTTGTGAAGCAGGGAAATTCCCTATCTCTATACCAGCAGCAGGAG
Equine_papillomavirus_2_isolate_Zurich_2009_HM461973.1_complete_genome	7803	951	1143	NODE_59_length_2527_cov_3.244898	1903	2095	199	69.849	4.57e-12	GGACGCTGACCCAGGTACAAGCCCCGGGGAGGGGTGCAGCGGAGCATGCTTCATTTTA---AGGGAGGCACAGTGCAGCGACCCTGATAGCGGGGATGA-TGAGGGAGACACCCCAGACAG--TCCAGGTGCCTATGATTTTGTAGATAACGCCTTTGTGAAGCAGGGAAATTCCCTATCTCTATACCAGCAGCAGGAG
Equine_papillomavirus_2_complete_genome_EU503122.1	7802	951	1142	NODE_59_length_2527_cov_3.244898	1903	2095	199	68.844	2.89e-08	GGACGCTGACCCAGGTACAAGCCCCGGGGAGGGGTGCAGCGGAGCATGCTTCATTTTA---AGGGAGGCACAGTGCAGCGACCCTGATAGCGGGGATGA-TGAGGGAGACACCCCAGACAG--TCCAGGTGCCTATGATTTTGTAGATAACGCCTTTGTGAAGCAGGGAAATTCCCTATCTCTATACCAGCAGCAGGAG
Equine_papillomavirus_2_complete_genome_NC_012123.1	7802	951	1142	NODE_59_length_2527_cov_3.244898	1903	2095	199	68.844	2.89e-08	GGACGCTGACCCAGGTACAAGCCCCGGGGAGGGGTGCAGCGGAGCATGCTTCATTTTA---AGGGAGGCACAGTGCAGCGACCCTGATAGCGGGGATGA-TGAGGGAGACACCCCAGACAG--TCCAGGTGCCTATGATTTTGTAGATAACGCCTTTGTGAAGCAGGGAAATTCCCTATCTCTATACCAGCAGCAGGAG
Equus_caballus_papillomavirus_9_strain_complete_genome_SW_MN117918.1	7656	1333	1525	NODE_10_length_5103_cov_2.636689	3423	3231	199	69.347	1.91e-10	GGACAATGACCCAGGTACTAGCCCAAGGGAGGGGACTAGTGGCGCAGCCTGTTTTCTGGATAGGGAGGCGCTGTGTAGCGACTGTGATAGTG---ATGACTTAGAG-GATTCCTCAGAAGGGATCGATGGGGCA--GACTTTGTCGACAATGCATTTGTCGGCCAGGGAAATTCCCTAGCACTGTTCCAGCAGCAGCAG
Equus_caballus_papillomavirus_9_strain_complete_genome_SW_MN117918.1	7656	3002	3196	NODE_1134_length_652_cov_0.645217	16	210	196	68.367	1.91e-10	TTTGAAAACCCCTATCCGCTTGATGAGGCGGGTCAGCCCTTGTTTAAATTGACTGATGCAAACTGGAGTTGTTTTTTTAAAAGGTTATGGGCGCGTATTGAGCTAAGCGACTGCGAGGACGAAGGGGAAGATGGCGGCGGTCCAGGAACGC-TTAGATGCTGCGCAAGAACTGCAGATGCAAATAATTGAGGGGGG
Equine_papillomavirus_3_isolate_Haflinger_GU384895.1_complete_genome	7582	2709	2899	NODE_44_length_2765_cov_2.798363	1790	1600	195	66.667	0.002	GGCCATAGGCATGGAACTGCGCCT-GACAAGCCTGGCA-CAGTCCGCCTTTGCAGAGGAGCCCTGGACAATGACTGACACCAGTCATGAAACCTTTTGTGCAGCACCAACAGAGACCTTTAAAAAAGAGGGCAGTG--TGGTAACTGTGACATTTGATGGTGAAAGGGGGAATGACATGTGGTACACAAAATGGG
Equine_papillomavirus_3_complete_genome_NC_017862.1	7582	2709	2899	NODE_44_length_2765_cov_2.798363	1790	1600	195	66.667	0.002	GGCCATAGGCATGGAACTGCGCCT-GACAAGCCTGGCA-CAGTCCGCCTTTGCAGAGGAGCCCTGGACAATGACTGACACCAGTCATGAAACCTTTTGTGCAGCACCAACAGAGACCTTTAAAAAAGAGGGCAGTG--TGGTAACTGTGACATTTGATGGTGAAAGGGGGAATGACATGTGGTACACAAAATGGG
Equus_caballus_papillomavirus_1_isolate_G2_complete_genome_MN164462.1	7611	5799	5988	NODE_57_length_2540_cov_2.874137	678	489	193	69.948	1.28e-12	CACACCCCCATTGAGGACGGGGACATGGGCGACATAGGTTTTGGTTGTCTTGACTTTAAGTACCTCTGCGAGA--ACAAGTCAGACATTCCACTGGACATTGTAGATGCCACCTGCAAGTACCCGGACTACATT-AAGATGGGTCAGGAGGCCTCTGGCAACTGCATGTTCTTCTATGCTAGGCGGGAGCAGA
Equus_ferus_caballus_papillomavirus_type_5_complete_genome_JQ031033.1	7519	3980	4165	NODE_44_length_2765_cov_2.798363	497	312	186	70.968	4.7e-18	GCGCTGCCTGCAAAGCGCCGCCGCAGGGCGGCGGTAGAGGACCTTTACAAACAGTGCATAATGGGTGCTGATTGCCCGCCCGATGTGAGACCCCGAGTGGAAGGGGACACATTGGCTGACCGGATTTTGAAATGGGTCAGCTCATTTCTGTATTTGGGCAATTTAGGCATCAGCACCGGACGCGGT
Equus_ferus_caballus_papillomavirus_type_5_complete_genome_NC_020084.1	7519	3980	4165	NODE_44_length_2765_cov_2.798363	497	312	186	70.968	4.7e-18	GCGCTGCCTGCAAAGCGCCGCCGCAGGGCGGCGGTAGAGGACCTTTACAAACAGTGCATAATGGGTGCTGATTGCCCGCCCGATGTGAGACCCCGAGTGGAAGGGGACACATTGGCTGACCGGATTTTGAAATGGGTCAGCTCATTTCTGTATTTGGGCAATTTAGGCATCAGCACCGGACGCGGT
Equus_caballus_papillomavirus_2_isolate_XJ-ks1391_complete_genome_MW410986.1	7802	2937	3109	NODE_11034_length_272_cov_0.953846	183	11	178	72.472	1.7e-17	GCCTGTGCCTCCACTGTCTGTGTCCGCAGCCAAGGCCAAGGATGCCATTTTGATGCACCTGACACTTAGTTCTT-----TGCTGGAGTCACCCTTTGGACAGGAGCCCTGGAGTCTGACAGATGTCAGCAAAGAAATGTTTGCAGCCACGCCTCATCATACGCTTAAGAAGGGAGGGT
Equine_papillomavirus_2_isolate_Zurich_2009_HM461973.1_complete_genome	7803	2938	3110	NODE_11034_length_272_cov_0.953846	183	11	178	72.472	1.7e-17	GCCTGTGCCTCCACTGTCTGTGTCCGCAGCCAAGGCCAAGGATGCCATTTTGATGCACCTGACACTTAGTTCTT-----TGCTGGAGTCACCCTTTGGACAGGAGCCCTGGAGTCTGACAGATGTCAGCAAAGAAATGTTTGCAGCCACGCCTCATCATACGCTTAAGAAGGGAGGGT
Equine_papillomavirus_2_complete_genome_EU503122.1	7802	2937	3109	NODE_11034_length_272_cov_0.953846	183	11	178	72.472	1.7e-17	GCCTGTGCCTCCACTGTCTGTGTCCGCAGCCAAGGCCAAGGATGCCATTTTGATGCACCTGACACTTAGTTCTT-----TGCTGGAGTCACCCTTTGGACAGGAGCCCTGGAGTCTGACAGATGTCAGCAAAGAAATGTTTGCAGCCACGCCTCATCATACGCTTAAGAAGGGAGGGT
Equine_papillomavirus_2_complete_genome_NC_012123.1	7802	2937	3109	NODE_11034_length_272_cov_0.953846	183	11	178	72.472	1.7e-17	GCCTGTGCCTCCACTGTCTGTGTCCGCAGCCAAGGCCAAGGATGCCATTTTGATGCACCTGACACTTAGTTCTT-----TGCTGGAGTCACCCTTTGGACAGGAGCCCTGGAGTCTGACAGATGTCAGCAAAGAAATGTTTGCAGCCACGCCTCATCATACGCTTAAGAAGGGAGGGT
Equus_caballus_papillomavirus_type_1_complete_genome_AF498323.1	7610	5310	5464	NODE_142_length_1652_cov_2.527619	568	417	158	73.418	4.46e-12	ATATTTTATCATGGCAACAGTGAGCGCTTGCTTACAGTGGGCCATCCCTATTTTGC-ACTTAAGGA-TGGGGGTAAA-AAAC--TGGATGTTCCTAAGGTGTCCCCAAATCAGTATAGGGTGTTTGAG-GTGGTTTTGCCAAACCCCAACAAATTTGC
Equus_caballus_papillomavirus_type_1_complete_genome_NC_003748.1	7610	5310	5464	NODE_142_length_1652_cov_2.527619	568	417	158	73.418	4.46e-12	ATATTTTATCATGGCAACAGTGAGCGCTTGCTTACAGTGGGCCATCCCTATTTTGC-ACTTAAGGA-TGGGGGTAAA-AAAC--TGGATGTTCCTAAGGTGTCCCCAAATCAGTATAGGGTGTTTGAG-GTGGTTTTGCCAAACCCCAACAAATTTGC
Equus_caballus_papillomavirus_1_isolate_G2_complete_genome_MN164462.1	7611	5310	5460	NODE_142_length_1652_cov_2.527619	568	421	154	72.078	2.81e-08	ATATTTTATCATGGCAACAGTGAGCGCTTGCTTACAGTGGGCCATCCCTATTTTGC-ACTTAAGGA-TGGGGGTAAA-AAAC--TGGATGTTCCTAAGGTGTCCCCAAATCAGTATAGGGTGTTTGAG-GTGGTTTTGCCAAACCCCAACAAAT
Equus_caballus_papillomavirus_2_isolate_XJ-ks1391_complete_genome_MW410986.1	7802	1859	2006	NODE_3380_length_431_cov_1.542373	171	24	149	71.812	4.57e-12	GACCACCGTGTTTGGCAAGCCCCCGGAATGGATGGCGAGGCAAACACTGCTGCAGCACCAAACAGAAGATGCTATGAAATTTGATATGTCACAAATGGTGCAGTGGGCCTATGACAATAACTACATGGACGAAA-TCACAATAGCATAT
Equine_papillomavirus_2_isolate_Zurich_2009_HM461973.1_complete_genome	7803	1860	2007	NODE_3380_length_431_cov_1.542373	171	24	149	71.812	4.57e-12	GACCACCGTGTTTGGCAAGCCCCCGGAATGGATGGCGAGGCAAACACTGCTGCAGCACCAAACAGAAGATGCTATGAAATTTGATATGTCACAAATGGTGCAGTGGGCCTATGACAATAACTACATGGACGAAA-TCACAATAGCATAT
Equine_papillomavirus_2_complete_genome_EU503122.1	7802	1859	2006	NODE_3380_length_431_cov_1.542373	171	24	149	71.812	4.57e-12	GACCACCGTGTTTGGCAAGCCCCCGGAATGGATGGCGAGGCAAACACTGCTGCAGCACCAAACAGAAGATGCTATGAAATTTGATATGTCACAAATGGTGCAGTGGGCCTATGACAATAACTACATGGACGAAA-TCACAATAGCATAT
Equine_papillomavirus_2_complete_genome_NC_012123.1	7802	1859	2006	NODE_3380_length_431_cov_1.542373	171	24	149	71.812	4.57e-12	GACCACCGTGTTTGGCAAGCCCCCGGAATGGATGGCGAGGCAAACACTGCTGCAGCACCAAACAGAAGATGCTATGAAATTTGATATGTCACAAATGGTGCAGTGGGCCTATGACAATAACTACATGGACGAAA-TCACAATAGCATAT
Equine_papillomavirus_type_6_complete_genome_JQ965698.1	7551	6207	6347	NODE_57_length_2540_cov_2.874137	373	233	141	71.631	1.27e-12	CACGCCAAGTGGATCGCTGGTGTCCACCGACTCTCAAATCTTTAACAGGCCTTACTGGCTGCAGCGTGCACAGGGGCAAAACAATGGGGTCTGCTGGCATGACAAGGTGTATGTTACAGTTTTTGACAACACCCGGGGTAC
Equine_papillomavirus_type_6_complete_genome_NC_020500.1	7551	6207	6347	NODE_57_length_2540_cov_2.874137	373	233	141	71.631	1.27e-12	CACGCCAAGTGGATCGCTGGTGTCCACCGACTCTCAAATCTTTAACAGGCCTTACTGGCTGCAGCGTGCACAGGGGCAAAACAATGGGGTCTGCTGGCATGACAAGGTGTATGTTACAGTTTTTGACAACACCCGGGGTAC
Equine_papillomavirus_type_6_complete_genome_JQ965698.1	7551	2800	2935	NODE_44_length_2765_cov_2.798363	1735	1600	137	67.883	0.007	GAGCCCTGGACAATGACTGACACCAGTCATGAAACCTTTTGTGCAGCACCAACAGAGACCTTTAAAAAAGAGGGCA-GTGTGGTAACTGTGACATTTGATGGTGAAAGGGGGAATGACATGTGGTACACAAAATGGG
Equine_papillomavirus_type_6_complete_genome_NC_020500.1	7551	2800	2935	NODE_44_length_2765_cov_2.798363	1735	1600	137	67.883	0.007	GAGCCCTGGACAATGACTGACACCAGTCATGAAACCTTTTGTGCAGCACCAACAGAGACCTTTAAAAAAGAGGGCA-GTGTGGTAACTGTGACATTTGATGGTGAAAGGGGGAATGACATGTGGTACACAAAATGGG
Equus_ferus_caballus_papillomavirus_type_7_complete_genome_JX035935.1	7619	2792	2926	NODE_44_length_2765_cov_2.798363	1741	1607	135	67.407	0.000621	GCAGAGGAGCCCTGGACAATGACTGACACCAGTCATGAAACCTTTTGTGCAGCACCAACAGAGACCTTTAAAAAAGAGGGCAGTGTGGTAACTGTGACATTTGATGGTGAAAGGGGGAATGACATGTGGTACACA
Equus_ferus_caballus_papillomavirus_type_7_complete_genome_NC_020501.1	7619	2792	2926	NODE_44_length_2765_cov_2.798363	1741	1607	135	67.407	0.000621	GCAGAGGAGCCCTGGACAATGACTGACACCAGTCATGAAACCTTTTGTGCAGCACCAACAGAGACCTTTAAAAAAGAGGGCAGTGTGGTAACTGTGACATTTGATGGTGAAAGGGGGAATGACATGTGGTACACA
Equus_ferus_caballus_papillomavirus_type_7_complete_genome_JX035935.1	7619	6019	6152	NODE_10444_length_279_cov_1.217822	1	134	134	73.881	2.47e-15	TGGACCTGGTGGACACTACCTCCAAGTACCCTGACTACATACAAATGGGCCAGGAGACATCTGGAAACAGCATGTTTTTCTTTGCTCGCAGAGAGCAGATGTACACAAGGCATTTTATGGTTAGGGATGGGCTT
Equus_ferus_caballus_papillomavirus_type_7_complete_genome_NC_020501.1	7619	6019	6152	NODE_10444_length_279_cov_1.217822	1	134	134	73.881	2.47e-15	TGGACCTGGTGGACACTACCTCCAAGTACCCTGACTACATACAAATGGGCCAGGAGACATCTGGAAACAGCATGTTTTTCTTTGCTCGCAGAGAGCAGATGTACACAAGGCATTTTATGGTTAGGGATGGGCTT
Equine_papillomavirus_3_isolate_Haflinger_GU384895.1_complete_genome	7582	2361	2491	NODE_1134_length_652_cov_0.645217	16	146	131	66.412	0.092	TTTGAAAACCCCTATCCGCTTGATGAGGCGGGTCAGCCCTTGTTTAAATTGACTGATGCAAACTGGAGTTGTTTTTTTAAAAGGTTATGGGCGCGTATTGAGCTAAGCGACTGCGAGGACGAAGGGGAAGA
Equine_papillomavirus_3_complete_genome_NC_017862.1	7582	2361	2491	NODE_1134_length_652_cov_0.645217	16	146	131	66.412	0.092	TTTGAAAACCCCTATCCGCTTGATGAGGCGGGTCAGCCCTTGTTTAAATTGACTGATGCAAACTGGAGTTGTTTTTTTAAAAGGTTATGGGCGCGTATTGAGCTAAGCGACTGCGAGGACGAAGGGGAAGA
Equine_papillomavirus_type_6_complete_genome_JQ965698.1	7551	2442	2570	NODE_1134_length_652_cov_0.645217	61	183	129	66.667	0.026	AAATTGACTGATGCAAACTGGAGTTGTTTTTTTAAAAGGTTATGGGCGCGTATTGAGCTAAGCGACTGCGAGGACGAAGG------GGAAGATGGCGGCGGTCCAGGAACGCTTAGATGCTGCGCAAGA
Equine_papillomavirus_type_6_complete_genome_NC_020500.1	7551	2442	2570	NODE_1134_length_652_cov_0.645217	61	183	129	66.667	0.026	AAATTGACTGATGCAAACTGGAGTTGTTTTTTTAAAAGGTTATGGGCGCGTATTGAGCTAAGCGACTGCGAGGACGAAGG------GGAAGATGGCGGCGGTCCAGGAACGCTTAGATGCTGCGCAAGA
Equus_caballus_papillomavirus_2_isolate_XJ-ks1391_complete_genome_MW410986.1	7802	2643	2770	NODE_1134_length_652_cov_0.645217	22	149	128	68.75	1.49e-05	AACCCCTATCCGCTTGATGAGGCGGGTCAGCCCTTGTTTAAATTGACTGATGCAAACTGGAGTTGTTTTTTTAAAAGGTTATGGGCGCGTATTGAGCTAAGCGACTGCGAGGACGAAGGGGAAGATGG
Equine_papillomavirus_2_isolate_Zurich_2009_HM461973.1_complete_genome	7803	2644	2771	NODE_1134_length_652_cov_0.645217	22	149	128	68.75	1.5e-05	AACCCCTATCCGCTTGATGAGGCGGGTCAGCCCTTGTTTAAATTGACTGATGCAAACTGGAGTTGTTTTTTTAAAAGGTTATGGGCGCGTATTGAGCTAAGCGACTGCGAGGACGAAGGGGAAGATGG
Equine_papillomavirus_2_complete_genome_EU503122.1	7802	2643	2770	NODE_1134_length_652_cov_0.645217	22	149	128	68.75	1.49e-05	AACCCCTATCCGCTTGATGAGGCGGGTCAGCCCTTGTTTAAATTGACTGATGCAAACTGGAGTTGTTTTTTTAAAAGGTTATGGGCGCGTATTGAGCTAAGCGACTGCGAGGACGAAGGGGAAGATGG
Equine_papillomavirus_2_complete_genome_NC_012123.1	7802	2643	2770	NODE_1134_length_652_cov_0.645217	22	149	128	68.75	1.49e-05	AACCCCTATCCGCTTGATGAGGCGGGTCAGCCCTTGTTTAAATTGACTGATGCAAACTGGAGTTGTTTTTTTAAAAGGTTATGGGCGCGTATTGAGCTAAGCGACTGCGAGGACGAAGGGGAAGATGG
Equus_caballus_papillomavirus_1_strain_150904_complete_genome_MF288893.1	7613	5494	5611	NODE_12900_length_257_cov_1.722222	1	118	125	69.6	5.09e-05	CAGAGTCTGAGCGGCTGGTGTGGGCTTGCACCGGCGTGGAGGTTTGCAGAGGTCAACCTCTGGGTATAGGCCTGTCAGGCA-----GCTCCTAT--TTCAATAAGAATGAAGATGTAGAAAACCC
Equine_papillomavirus_3_isolate_Haflinger_GU384895.1_complete_genome	7582	6214	6338	NODE_57_length_2540_cov_2.874137	336	212	125	77.6	3.2e-20	ATCTTTAACAGGCCTTACTGGCTGCAGCGTGCACAGGGGCAAAACAATGGGGTCTGCTGGCATGACAAGGTGTATGTTACAGTTTTTGACAACACCCGGGGTACCAATTTCAGCATCAGTGTCAA
Equine_papillomavirus_3_complete_genome_NC_017862.1	7582	6214	6338	NODE_57_length_2540_cov_2.874137	336	212	125	77.6	3.2e-20	ATCTTTAACAGGCCTTACTGGCTGCAGCGTGCACAGGGGCAAAACAATGGGGTCTGCTGGCATGACAAGGTGTATGTTACAGTTTTTGACAACACCCGGGGTACCAATTTCAGCATCAGTGTCAA
Equus_caballus_papillomavirus_9_strain_complete_genome_SW_MN117918.1	7656	6697	6818	NODE_5577_length_360_cov_1.310954	167	46	124	71.774	3.45e-07	TGCCCCCCATTAGAGCTC--AAACACGCTACCCTGCAGGATGGTGACATGGTAGATATTGGGTATGGTAACCTTAACTTTCAGGAGCTGCAGGACAGCCGGTCTGAGGTGCCCCTAGACCTGGT
Equine_papillomavirus_3_isolate_Haflinger_GU384895.1_complete_genome	7582	6385	6507	NODE_57_length_2540_cov_2.874137	153	31	123	66.667	0.32	AGACATGTGGAGGAGTATGAATTGTCCTTCATCTTTGAGCTGTGCAGTGTCACGTTGTCTCCAGAGGTAATGGCGCACCTGCACACCATGGACCCAGACATTCTTGAGGAATGGGAAATAGGC
Equine_papillomavirus_3_complete_genome_NC_017862.1	7582	6385	6507	NODE_57_length_2540_cov_2.874137	153	31	123	66.667	0.32	AGACATGTGGAGGAGTATGAATTGTCCTTCATCTTTGAGCTGTGCAGTGTCACGTTGTCTCCAGAGGTAATGGCGCACCTGCACACCATGGACCCAGACATTCTTGAGGAATGGGAAATAGGC
Equus_caballus_papillomavirus_1_isolate_G2_complete_genome_MN164462.1	7611	5491	5608	NODE_12900_length_257_cov_1.722222	1	118	122	70.492	0.008	CAGAGTCTGAGCGGCTGGTGTGGGCTTGCACCGGCGTGGAGGTTTGCAGAGGTCAACCTCT-GGGTAT-AGGCCTGTCAGGCAGCTCCTAT--TTCAATAAGAATGAAGATGTAGAAAACCC
Equus_caballus_papillomavirus_type_1_complete_genome_AF498323.1	7610	5491	5608	NODE_12900_length_257_cov_1.722222	1	118	122	72.131	1.46e-05	CAGAGTCTGAGCGGCTGGTGTGGGCTTGCACCGGCGTGGAGGTTTGCAGAGGTCAACCTCT-GGGTAT-AGGCCTGTCAGGCAGCTCCTAT--TTCAATAAGAATGAAGATGTAGAAAACCC
Equus_caballus_papillomavirus_type_1_complete_genome_NC_003748.1	7610	5491	5608	NODE_12900_length_257_cov_1.722222	1	118	122	72.131	1.46e-05	CAGAGTCTGAGCGGCTGGTGTGGGCTTGCACCGGCGTGGAGGTTTGCAGAGGTCAACCTCT-GGGTAT-AGGCCTGTCAGGCAGCTCCTAT--TTCAATAAGAATGAAGATGTAGAAAACCC
Equus_ferus_caballus_papillomavirus_type_7_complete_genome_JX035935.1	7619	6000	6121	NODE_57_length_2540_cov_2.874137	606	485	122	70.492	9.83e-08	AACAAGTCAGACATTCCACTGGACATTGTAGATGCCACCTGCAAGTACCCGGACTACATTAAGATGGGTCAGGAGGCCTCTGGCAACTGCATGTTCTTCTATGCTAGGCGGGAGCAGATGTA
Equus_ferus_caballus_papillomavirus_type_7_complete_genome_JX035935.1	7619	6442	6562	NODE_57_length_2540_cov_2.874137	152	32	122	70.492	1.46e-05	GACATGTGGAGGAGTATGAATTGTCCTTCATCTTTGAGCTGTGCAGTGTCACGTTGTCTCCAGAGGTAATGGCGCACCTGCACACCATGGACCCAGACA-TTCTTGAGGAATGGGAAATAGG
Equus_ferus_caballus_papillomavirus_type_7_complete_genome_NC_020501.1	7619	6000	6121	NODE_57_length_2540_cov_2.874137	606	485	122	70.492	9.83e-08	AACAAGTCAGACATTCCACTGGACATTGTAGATGCCACCTGCAAGTACCCGGACTACATTAAGATGGGTCAGGAGGCCTCTGGCAACTGCATGTTCTTCTATGCTAGGCGGGAGCAGATGTA
Equus_ferus_caballus_papillomavirus_type_7_complete_genome_NC_020501.1	7619	6442	6562	NODE_57_length_2540_cov_2.874137	152	32	122	70.492	1.46e-05	GACATGTGGAGGAGTATGAATTGTCCTTCATCTTTGAGCTGTGCAGTGTCACGTTGTCTCCAGAGGTAATGGCGCACCTGCACACCATGGACCCAGACA-TTCTTGAGGAATGGGAAATAGG
Equine_papillomavirus_type_6_complete_genome_JQ965698.1	7551	3912	4030	NODE_44_length_2765_cov_2.798363	473	355	121	69.421	0.000615	AGGGCGGCGGTAGAGGACCTTTACAAACAGTGCATAATGGGTGCTGAT--TGCCCGCCCGATGTGAGACCCCGAGTGGAAGGGGACACATTGGCTGACCGGATTTTGAAATGGGTCAGCTC
Equine_papillomavirus_type_6_complete_genome_NC_020500.1	7551	3912	4030	NODE_44_length_2765_cov_2.798363	473	355	121	69.421	0.000615	AGGGCGGCGGTAGAGGACCTTTACAAACAGTGCATAATGGGTGCTGAT--TGCCCGCCCGATGTGAGACCCCGAGTGGAAGGGGACACATTGGCTGACCGGATTTTGAAATGGGTCAGCTC
Equus_caballus_papillomavirus_2_isolate_XJ-ks1391_complete_genome_MW410986.1	7802	6261	6373	NODE_10813_length_275_cov_0.813131	1	113	116	74.138	8.27e-09	GATGGGGACATGGCTGACACAGGGTTTGGT-GCCATGAACTTT--GCCACACTGCAGGAGAGCAAGTCTGAGGTGCCATTTGACATTGCAGGGACCACCTGCAAGTATCCTGACTA
Equine_papillomavirus_2_isolate_Zurich_2009_HM461973.1_complete_genome	7803	6262	6374	NODE_10813_length_275_cov_0.813131	1	113	116	74.138	8.27e-09	GATGGGGACATGGCTGACACAGGGTTTGGT-GCCATGAACTTT--GCCACACTGCAGGAGAGCAAGTCTGAGGTGCCATTTGACATTGCAGGGACCACCTGCAAGTATCCTGACTA
Equine_papillomavirus_2_complete_genome_EU503122.1	7802	6261	6373	NODE_10813_length_275_cov_0.813131	1	113	116	74.138	8.27e-09	GATGGGGACATGGCTGACACAGGGTTTGGT-GCCATGAACTTT--GCCACACTGCAGGAGAGCAAGTCTGAGGTGCCATTTGACATTGCAGGGACCACCTGCAAGTATCCTGACTA
Equine_papillomavirus_2_complete_genome_NC_012123.1	7802	6261	6373	NODE_10813_length_275_cov_0.813131	1	113	116	74.138	8.27e-09	GATGGGGACATGGCTGACACAGGGTTTGGT-GCCATGAACTTT--GCCACACTGCAGGAGAGCAAGTCTGAGGTGCCATTTGACATTGCAGGGACCACCTGCAAGTATCCTGACTA
Equus_caballus_papillomavirus_1_strain_150904_complete_genome_MF288893.1	7613	6144	6258	NODE_57_length_2540_cov_2.874137	339	225	115	68.696	0.00062	CAAATCTTTAACAGGCCTTACTGGCTGCAGCGTGCACAGGGGCAAAACAATGGGGTCTGCTGGCATGACAAGGTGTATGTTACAGTTTTTGACAACACCCGGGGTACCAATTTCA
Equus_caballus_papillomavirus_1_isolate_G2_complete_genome_MN164462.1	7611	6141	6255	NODE_57_length_2540_cov_2.874137	339	225	115	67.826	0.026	CAAATCTTTAACAGGCCTTACTGGCTGCAGCGTGCACAGGGGCAAAACAATGGGGTCTGCTGGCATGACAAGGTGTATGTTACAGTTTTTGACAACACCCGGGGTACCAATTTCA
Equus_caballus_papillomavirus_type_1_complete_genome_AF498323.1	7610	6141	6255	NODE_57_length_2540_cov_2.874137	339	225	115	68.696	0.00062	CAAATCTTTAACAGGCCTTACTGGCTGCAGCGTGCACAGGGGCAAAACAATGGGGTCTGCTGGCATGACAAGGTGTATGTTACAGTTTTTGACAACACCCGGGGTACCAATTTCA
Equus_caballus_papillomavirus_type_1_complete_genome_NC_003748.1	7610	6141	6255	NODE_57_length_2540_cov_2.874137	339	225	115	68.696	0.00062	CAAATCTTTAACAGGCCTTACTGGCTGCAGCGTGCACAGGGGCAAAACAATGGGGTCTGCTGGCATGACAAGGTGTATGTTACAGTTTTTGACAACACCCGGGGTACCAATTTCA
Equus_ferus_caballus_papillomavirus_type_7_complete_genome_JX035935.1	7619	6279	6391	NODE_57_length_2540_cov_2.874137	324	212	113	77.876	1.66e-17	CCTTACTGGCTGCAGCGTGCACAGGGGCAAAACAATGGGGTCTGCTGGCATGACAAGGTGTATGTTACAGTTTTTGACAACACCCGGGGTACCAATTTCAGCATCAGTGTCAA
Equus_ferus_caballus_papillomavirus_type_7_complete_genome_JX035935.1	7619	5943	6055	NODE_10813_length_275_cov_0.813131	1	113	113	71.681	2.82e-08	GATGGGGACATGGCTGACACAGGGTTTGGTGCCATGAACTTTGCCACACTGCAGGAGAGCAAGTCTGAGGTGCCATTTGACATTGCAGGGACCACCTGCAAGTATCCTGACTA
Equus_ferus_caballus_papillomavirus_type_7_complete_genome_NC_020501.1	7619	6279	6391	NODE_57_length_2540_cov_2.874137	324	212	113	77.876	1.66e-17	CCTTACTGGCTGCAGCGTGCACAGGGGCAAAACAATGGGGTCTGCTGGCATGACAAGGTGTATGTTACAGTTTTTGACAACACCCGGGGTACCAATTTCAGCATCAGTGTCAA
Equus_ferus_caballus_papillomavirus_type_7_complete_genome_NC_020501.1	7619	5943	6055	NODE_10813_length_275_cov_0.813131	1	113	113	71.681	2.82e-08	GATGGGGACATGGCTGACACAGGGTTTGGTGCCATGAACTTTGCCACACTGCAGGAGAGCAAGTCTGAGGTGCCATTTGACATTGCAGGGACCACCTGCAAGTATCCTGACTA
Equus_caballus_papillomavirus_9_strain_complete_genome_SW_MN117918.1	7656	6733	6845	NODE_10813_length_275_cov_0.813131	1	113	113	72.566	2.32e-09	GATGGGGACATGGCTGACACAGGGTTTGGTGCCATGAACTTTGCCACACTGCAGGAGAGCAAGTCTGAGGTGCCATTTGACATTGCAGGGACCACCTGCAAGTATCCTGACTA
Equine_papillomavirus_type_6_complete_genome_JQ965698.1	7551	5806	5906	NODE_3396_length_431_cov_0.870056	158	49	112	68.75	0.091	ATCGTGGGGTGCAAGCCGGCAACCGGTGAGTACTGGGGCAGGGGAAAGGCCTGCGAGGGTGATGAGG-AGGAG-TACCGGGAGCAAACCAAGTGCCCACCGCTCGAGCTGAA
Equine_papillomavirus_type_6_complete_genome_NC_020500.1	7551	5806	5906	NODE_3396_length_431_cov_0.870056	158	49	112	68.75	0.091	ATCGTGGGGTGCAAGCCGGCAACCGGTGAGTACTGGGGCAGGGGAAAGGCCTGCGAGGGTGATGAGG-AGGAG-TACCGGGAGCAAACCAAGTGCCCACCGCTCGAGCTGAA
Equine_papillomavirus_3_isolate_Haflinger_GU384895.1_complete_genome	7582	693	789	NODE_59_length_2527_cov_3.244898	1892	1994	106	69.811	0.002	GAGGATATAATGGA---CGCTGACCCAGGTACAAGCCCCGGGGAGGGGTGCAGCGGAGCATGCTTCATTTTAAGGGAGGCACAGTGCAGCGACCCTGATAGCGGGG
Equine_papillomavirus_3_complete_genome_NC_017862.1	7582	693	789	NODE_59_length_2527_cov_3.244898	1892	1994	106	69.811	0.002	GAGGATATAATGGA---CGCTGACCCAGGTACAAGCCCCGGGGAGGGGTGCAGCGGAGCATGCTTCATTTTAAGGGAGGCACAGTGCAGCGACCCTGATAGCGGGG
Equus_caballus_papillomavirus_2_isolate_XJ-ks1391_complete_genome_MW410986.1	7802	5961	6064	NODE_12900_length_257_cov_1.722222	15	118	104	68.269	0.094	CTGGTGTGGGCTTGCACCGGCGTGGAGGTTTGCAGAGGTCAACCTCTGGGTATAGGCCTGTCAGGCAGCTCCTATTTCAATAAGAATGAAGATGTAGAAAACCC
Equine_papillomavirus_2_isolate_Zurich_2009_HM461973.1_complete_genome	7803	5962	6065	NODE_12900_length_257_cov_1.722222	15	118	104	69.231	0.002	CTGGTGTGGGCTTGCACCGGCGTGGAGGTTTGCAGAGGTCAACCTCTGGGTATAGGCCTGTCAGGCAGCTCCTATTTCAATAAGAATGAAGATGTAGAAAACCC
Equine_papillomavirus_2_complete_genome_EU503122.1	7802	5961	6064	NODE_12900_length_257_cov_1.722222	15	118	104	68.269	0.094	CTGGTGTGGGCTTGCACCGGCGTGGAGGTTTGCAGAGGTCAACCTCTGGGTATAGGCCTGTCAGGCAGCTCCTATTTCAATAAGAATGAAGATGTAGAAAACCC
Equine_papillomavirus_2_complete_genome_NC_012123.1	7802	5961	6064	NODE_12900_length_257_cov_1.722222	15	118	104	68.269	0.094	CTGGTGTGGGCTTGCACCGGCGTGGAGGTTTGCAGAGGTCAACCTCTGGGTATAGGCCTGTCAGGCAGCTCCTATTTCAATAAGAATGAAGATGTAGAAAACCC
Equus_caballus_papillomavirus_8_strain_NCSU_complete_genome_KU963288.1	8155	7013	7115	NODE_57_length_2540_cov_2.874137	335	233	103	73.786	2.48e-09	TCTTTAACAGGCCTTACTGGCTGCAGCGTGCACAGGGGCAAAACAATGGGGTCTGCTGGCATGACAAGGTGTATGTTACAGTTTTTGACAACACCCGGGGTAC
Equus_caballus_papillomavirus_8_strain_NCSU_complete_genome_NC_031756.1	8155	7013	7115	NODE_57_length_2540_cov_2.874137	335	233	103	73.786	2.48e-09	TCTTTAACAGGCCTTACTGGCTGCAGCGTGCACAGGGGCAAAACAATGGGGTCTGCTGGCATGACAAGGTGTATGTTACAGTTTTTGACAACACCCGGGGTAC
Equus_caballus_papillomavirus_1_strain_150904_complete_genome_MF288893.1	7613	1629	1729	NODE_3380_length_431_cov_1.542373	116	16	102	73.529	1.2e-06	CACCAAACAGAAGATGCTATGAAATTTGATATGTCACAAATGGTGCAGTGGGCCTATGACAATAACTACATGGACGA-AATCACAATAGCATATCAATATGC
Equus_caballus_papillomavirus_1_isolate_G2_complete_genome_MN164462.1	7611	1629	1729	NODE_3380_length_431_cov_1.542373	116	16	102	73.529	1.2e-06	CACCAAACAGAAGATGCTATGAAATTTGATATGTCACAAATGGTGCAGTGGGCCTATGACAATAACTACATGGACGA-AATCACAATAGCATATCAATATGC
Equus_caballus_papillomavirus_type_1_complete_genome_AF498323.1	7610	1629	1729	NODE_3380_length_431_cov_1.542373	116	16	102	73.529	1.2e-06	CACCAAACAGAAGATGCTATGAAATTTGATATGTCACAAATGGTGCAGTGGGCCTATGACAATAACTACATGGACGA-AATCACAATAGCATATCAATATGC
Equus_caballus_papillomavirus_type_1_complete_genome_NC_003748.1	7610	1629	1729	NODE_3380_length_431_cov_1.542373	116	16	102	73.529	1.2e-06	CACCAAACAGAAGATGCTATGAAATTTGATATGTCACAAATGGTGCAGTGGGCCTATGACAATAACTACATGGACGA-AATCACAATAGCATATCAATATGC
Equus_caballus_papillomavirus_8_strain_NCSU_complete_genome_KU963288.1	8155	2814	2913	NODE_10_length_5103_cov_2.636689	1352	1253	100	69	0.028	CTTTGCAGGCGAGCCCTGGAGTATGACAGATGTCAGCCGCGAAATGTACGCGGCCCCGCCTTGCGATACGTTCAAAAAGGGAGGGTACGTTGTCGAGGTG
Equus_caballus_papillomavirus_8_strain_NCSU_complete_genome_NC_031756.1	8155	2814	2913	NODE_10_length_5103_cov_2.636689	1352	1253	100	69	0.028	CTTTGCAGGCGAGCCCTGGAGTATGACAGATGTCAGCCGCGAAATGTACGCGGCCCCGCCTTGCGATACGTTCAAAAAGGGAGGGTACGTTGTCGAGGTG
Equine_papillomavirus_3_isolate_Haflinger_GU384895.1_complete_genome	7582	5905	6003	NODE_10813_length_275_cov_0.813131	16	114	99	68.687	0.092	GACACAGGGTTTGGTGCCATGAACTTTGCCACACTGCAGGAGAGCAAGTCTGAGGTGCCATTTGACATTGCAGGGACCACCTGCAAGTATCCTGACTAT
Equine_papillomavirus_3_complete_genome_NC_017862.1	7582	5905	6003	NODE_10813_length_275_cov_0.813131	16	114	99	68.687	0.092	GACACAGGGTTTGGTGCCATGAACTTTGCCACACTGCAGGAGAGCAAGTCTGAGGTGCCATTTGACATTGCAGGGACCACCTGCAAGTATCCTGACTAT
Equus_ferus_caballus_papillomavirus_type_5_complete_genome_JQ031033.1	7519	1212	1309	NODE_59_length_2527_cov_3.244898	2420	2517	99	73.737	1.18e-06	GCGGCTATGCTTGCGCGCTTTAAAGAAGCCTTTGAGGTCAGCTATACAGAACTCACCAGAGACTTTAAGAGTAATAAGACATG-TACTGGGGACTGGGT
Equus_ferus_caballus_papillomavirus_type_5_complete_genome_NC_020084.1	7519	1212	1309	NODE_59_length_2527_cov_3.244898	2420	2517	99	73.737	1.18e-06	GCGGCTATGCTTGCGCGCTTTAAAGAAGCCTTTGAGGTCAGCTATACAGAACTCACCAGAGACTTTAAGAGTAATAAGACATG-TACTGGGGACTGGGT
Equine_papillomavirus_type_6_complete_genome_JQ965698.1	7551	2494	2591	NODE_44_length_2765_cov_2.798363	2035	1944	98	69.388	0.007	TAGATCTCAGTGAACCAGAGGACGAAGG------GGAAGATGGAGAGGCTACGGAAAGCTTTAGATGCTGTTCTAGAAGAGCAGATGCTTCTCTATGA
Equine_papillomavirus_type_6_complete_genome_NC_020500.1	7551	2494	2591	NODE_44_length_2765_cov_2.798363	2035	1944	98	69.388	0.007	TAGATCTCAGTGAACCAGAGGACGAAGG------GGAAGATGGAGAGGCTACGGAAAGCTTTAGATGCTGTTCTAGAAGAGCAGATGCTTCTCTATGA
Equus_caballus_papillomavirus_8_strain_NCSU_complete_genome_KU963288.1	8155	2496	2588	NODE_10_length_5103_cov_2.636689	1670	1578	94	84.043	1.46e-18	TCTCTTTTTAAAAGGTTGTGGCAACGCTTAGAATTGAGTGACCAGGAGGACGAGGGAGACGATGGAGAACCT-ACACAGGGCTTTAGATGCACT
Equus_caballus_papillomavirus_8_strain_NCSU_complete_genome_NC_031756.1	8155	2496	2588	NODE_10_length_5103_cov_2.636689	1670	1578	94	84.043	1.46e-18	TCTCTTTTTAAAAGGTTGTGGCAACGCTTAGAATTGAGTGACCAGGAGGACGAGGGAGACGATGGAGAACCT-ACACAGGGCTTTAGATGCACT
Equus_caballus_papillomavirus_8_strain_NCSU_complete_genome_KU963288.1	8155	6171	6260	NODE_23485_length_228_cov_0.814570	98	187	90	70	0.028	GAGCACTGATGAATATGTCAAGCGCACAAACATTTATTACTATGCAGGCAGTGAGCGTTTGCTCACTGTGGGCCATCCCTACTGGGAGAT
Equus_caballus_papillomavirus_8_strain_NCSU_complete_genome_NC_031756.1	8155	6171	6260	NODE_23485_length_228_cov_0.814570	98	187	90	70	0.028	GAGCACTGATGAATATGTCAAGCGCACAAACATTTATTACTATGCAGGCAGTGAGCGTTTGCTCACTGTGGGCCATCCCTACTGGGAGAT
Equus_ferus_caballus_papillomavirus_type_5_complete_genome_JQ031033.1	7519	3016	3102	NODE_44_length_2765_cov_2.798363	1486	1400	87	71.264	0.002	GCTGAGGATGCTAACAGGTATGGCAAACATGGAACATGGGAGGTGAAAGATGGTAATGAAACCTTCTATCATCCTCTTGTCACCAGC
Equus_ferus_caballus_papillomavirus_type_5_complete_genome_NC_020084.1	7519	3016	3102	NODE_44_length_2765_cov_2.798363	1486	1400	87	71.264	0.002	GCTGAGGATGCTAACAGGTATGGCAAACATGGAACATGGGAGGTGAAAGATGGTAATGAAACCTTCTATCATCCTCTTGTCACCAGC
Equine_papillomavirus_3_isolate_Haflinger_GU384895.1_complete_genome	7582	5732	5817	NODE_142_length_1652_cov_2.527619	243	158	86	69.767	0.092	ATGACAAGCGTGTCAATATAGCTTTTGATGTCAAGCAAAGCCAGGTTCTTATTGTGGGCTGCACACCTGCAATAGGGGAGCACTGG
Equine_papillomavirus_3_complete_genome_NC_017862.1	7582	5732	5817	NODE_142_length_1652_cov_2.527619	243	158	86	69.767	0.092	ATGACAAGCGTGTCAATATAGCTTTTGATGTCAAGCAAAGCCAGGTTCTTATTGTGGGCTGCACACCTGCAATAGGGGAGCACTGG
Equus_ferus_caballus_papillomavirus_type_4_complete_genome_NC_020085.1	7554	2791	2871	NODE_10_length_5103_cov_2.636689	1288	1208	83	71.084	0.32	GATACGTTCAAAAAGGGAGGGTACGTTGTCGAGGTGTTCTTT--AGCCAAGACAGCCACGACGCCATGTGGTATACAGGCTGG
Equus_ferus_caballus_papillomavirus_type_4_complete_genome_JQ031032.1	7554	2791	2871	NODE_10_length_5103_cov_2.636689	1288	1208	83	71.084	0.32	GATACGTTCAAAAAGGGAGGGTACGTTGTCGAGGTGTTCTTT--AGCCAAGACAGCCACGACGCCATGTGGTATACAGGCTGG
Equine_papillomavirus_type_6_complete_genome_JQ965698.1	7551	1697	1774	NODE_3380_length_431_cov_1.542373	93	16	80	77.5	4.14e-06	ATTTGATATGTCACAAATGGTGCAGTGGGCCTATGACAATAACTA-CATGGAC-GAAATCACAATAGCATATCAATATGC
Equine_papillomavirus_type_6_complete_genome_NC_020500.1	7551	1697	1774	NODE_3380_length_431_cov_1.542373	93	16	80	77.5	4.14e-06	ATTTGATATGTCACAAATGGTGCAGTGGGCCTATGACAATAACTA-CATGGAC-GAAATCACAATAGCATATCAATATGC
Equus_caballus_papillomavirus_8_strain_NCSU_complete_genome_KU963288.1	8155	6532	6608	NODE_57_length_2540_cov_2.874137	813	737	79	74.684	0.008	AATATGGGCTTCGATGTGAAGCAGTCTCAG--CTTTTGATGGTGGGCTGCAAGCCGGCCATCGGCGAGCACTGGACCAA
Equus_caballus_papillomavirus_8_strain_NCSU_complete_genome_NC_031756.1	8155	6532	6608	NODE_57_length_2540_cov_2.874137	813	737	79	74.684	0.008	AATATGGGCTTCGATGTGAAGCAGTCTCAG--CTTTTGATGGTGGGCTGCAAGCCGGCCATCGGCGAGCACTGGACCAA
Equus_ferus_caballus_papillomavirus_type_5_complete_genome_JQ031033.1	7519	4084	4158	NODE_10_length_5103_cov_2.636689	91	17	75	84	8.51e-15	GGACACTGTGGCTGACCGCATTCTAAAATGGCTCAGCTCCTTTCTTTACCTTGGGAACCTGGGTATTGGCTCTGG
Equus_ferus_caballus_papillomavirus_type_5_complete_genome_NC_020084.1	7519	4084	4158	NODE_10_length_5103_cov_2.636689	91	17	75	84	8.51e-15	GGACACTGTGGCTGACCGCATTCTAAAATGGCTCAGCTCCTTTCTTTACCTTGGGAACCTGGGTATTGGCTCTGG
Equus_ferus_caballus_papillomavirus_type_5_complete_genome_JQ031033.1	7519	3362	3432	NODE_10_length_5103_cov_2.636689	771	701	72	75	0.007	GAGGCCCGGGGCTATTGGGA-ACCCCCCCTTCCCCCGCCCTTCTGCAGGGCGAGGATGCGCCGGACTCATCT
Equus_ferus_caballus_papillomavirus_type_5_complete_genome_NC_020084.1	7519	3362	3432	NODE_10_length_5103_cov_2.636689	771	701	72	75	0.007	GAGGCCCGGGGCTATTGGGA-ACCCCCCCTTCCCCCGCCCTTCTGCAGGGCGAGGATGCGCCGGACTCATCT
Equine_papillomavirus_type_6_complete_genome_JQ965698.1	7551	5616	5687	NODE_12900_length_257_cov_1.722222	8	79	72	75	5.05e-05	TGAGCGGCTGGTGTGGGCTTGCACCGGCGTGGAGGTTTGCAGAGGTCAACCTCTGGGTATAGGCCTGTCAGG
Equine_papillomavirus_type_6_complete_genome_NC_020500.1	7551	5616	5687	NODE_12900_length_257_cov_1.722222	8	79	72	75	5.05e-05	TGAGCGGCTGGTGTGGGCTTGCACCGGCGTGGAGGTTTGCAGAGGTCAACCTCTGGGTATAGGCCTGTCAGG
Equus_caballus_papillomavirus_8_strain_NCSU_complete_genome_KU963288.1	8155	3825	3895	NODE_15882_length_250_cov_0.693642	144	210	72	73.611	0.028	GCCACGGCCCCACGCGCAGGCCCCGCCCCAGCCCG-----CAGGCCCCGCCCCACGACAGGCCCCGCCCCCG
Equus_caballus_papillomavirus_8_strain_NCSU_complete_genome_NC_031756.1	8155	3825	3895	NODE_15882_length_250_cov_0.693642	144	210	72	73.611	0.028	GCCACGGCCCCACGCGCAGGCCCCGCCCCAGCCCG-----CAGGCCCCGCCCCACGACAGGCCCCGCCCCCG
Equus_caballus_papillomavirus_2_isolate_XJ-ks1391_complete_genome_MW410986.1	7802	6129	6196	NODE_3396_length_431_cov_0.870056	176	108	69	75.362	0.002	AAGCAGGTGCAAATTATGATCGTGGGGTGCAAGCCGGCAACCGGTGAGTACTGGGGCAGGGGAAAGGCC
Equine_papillomavirus_2_isolate_Zurich_2009_HM461973.1_complete_genome	7803	6130	6197	NODE_3396_length_431_cov_0.870056	176	108	69	75.362	0.002	AAGCAGGTGCAAATTATGATCGTGGGGTGCAAGCCGGCAACCGGTGAGTACTGGGGCAGGGGAAAGGCC
Equine_papillomavirus_2_complete_genome_EU503122.1	7802	6129	6196	NODE_3396_length_431_cov_0.870056	176	108	69	75.362	0.002	AAGCAGGTGCAAATTATGATCGTGGGGTGCAAGCCGGCAACCGGTGAGTACTGGGGCAGGGGAAAGGCC
Equine_papillomavirus_2_complete_genome_NC_012123.1	7802	6129	6196	NODE_3396_length_431_cov_0.870056	176	108	69	75.362	0.002	AAGCAGGTGCAAATTATGATCGTGGGGTGCAAGCCGGCAACCGGTGAGTACTGGGGCAGGGGAAAGGCC
Equus_ferus_caballus_papillomavirus_type_5_complete_genome_JQ031033.1	7519	614	682	NODE_59_length_2527_cov_3.244898	1855	1923	69	73.913	0.002	GACCTTGGCATAATCTGCCCCGCTTGCGCCACCACGCGAGGATATAATGGACGCTGACCCAGGTACAAG
Equus_ferus_caballus_papillomavirus_type_5_complete_genome_NC_020084.1	7519	614	682	NODE_59_length_2527_cov_3.244898	1855	1923	69	73.913	0.002	GACCTTGGCATAATCTGCCCCGCTTGCGCCACCACGCGAGGATATAATGGACGCTGACCCAGGTACAAG
Equine_papillomavirus_type_6_complete_genome_JQ965698.1	7551	5797	5863	NODE_5577_length_360_cov_1.310954	266	200	68	75	0.091	CAGCTCATTATTGTTGGCTGCAAACCCCCCACGGGGGAGTTTTGGGGCAAGGGT-AGCCCGTGTCAGG
Equine_papillomavirus_type_6_complete_genome_NC_020500.1	7551	5797	5863	NODE_5577_length_360_cov_1.310954	266	200	68	75	0.091	CAGCTCATTATTGTTGGCTGCAAACCCCCCACGGGGGAGTTTTGGGGCAAGGGT-AGCCCGTGTCAGG
Equus_caballus_papillomavirus_8_strain_NCSU_complete_genome_KU963288.1	8155	6283	6350	NODE_57_length_2540_cov_2.874137	1071	1004	68	77.941	1.28e-06	GTTCCCAAGGTGTCCTCTAATCAGTACAGGGTGTTTGAGGTAGTTCTCCCAAATCCCAACAAATTTGC
Equus_caballus_papillomavirus_8_strain_NCSU_complete_genome_KU963288.1	8155	2879	2946	NODE_1134_length_652_cov_0.645217	468	534	68	73.529	0.099	AGTGCTTTAAAAAAAACGGGTGCATTGTAGAGGTATTTTTTGACTGCAGTGAGGATAAC-GTAAGCTG
Equus_caballus_papillomavirus_8_strain_NCSU_complete_genome_NC_031756.1	8155	6283	6350	NODE_57_length_2540_cov_2.874137	1071	1004	68	77.941	1.28e-06	GTTCCCAAGGTGTCCTCTAATCAGTACAGGGTGTTTGAGGTAGTTCTCCCAAATCCCAACAAATTTGC
Equus_caballus_papillomavirus_8_strain_NCSU_complete_genome_NC_031756.1	8155	2879	2946	NODE_1134_length_652_cov_0.645217	468	534	68	73.529	0.099	AGTGCTTTAAAAAAAACGGGTGCATTGTAGAGGTATTTTTTGACTGCAGTGAGGATAAC-GTAAGCTG
Equus_caballus_papillomavirus_9_strain_complete_genome_SW_MN117918.1	7656	6437	6503	NODE_12900_length_257_cov_1.722222	13	79	68	75	0.093	GGCTGGTGTGGGC-TTGCACCGGCGTGGAGGTTTGCAGAGGTCAACCTCTGGGTATAGGCCTGTCAGG
Equine_papillomavirus_2_isolate_Zurich_2009_HM461973.1_complete_genome	7803	7500	7566	NODE_10_length_5103_cov_2.636689	4740	4676	67	76.119	0.008	TGACTTAATCCTTCAAA-GCATCATACGCGGTAAGTCT-TTGTTCTACTTTGTTGATTCTTGCCTTG
Equus_ferus_caballus_papillomavirus_type_7_complete_genome_JX035935.1	7619	5802	5865	NODE_3396_length_431_cov_0.870056	185	122	64	76.562	0.000178	CACGACCCCAAGCAGGTGCAAATTATGATCGTGGGGTGCAAGCCGGCAACCGGTGAGTACTGGG
Equus_ferus_caballus_papillomavirus_type_7_complete_genome_NC_020501.1	7619	5802	5865	NODE_3396_length_431_cov_0.870056	185	122	64	76.562	0.000178	CACGACCCCAAGCAGGTGCAAATTATGATCGTGGGGTGCAAGCCGGCAACCGGTGAGTACTGGG
Equus_ferus_caballus_papillomavirus_type_7_complete_genome_JX035935.1	7619	5964	6023	NODE_142_length_1652_cov_2.527619	61	2	60	81.667	9.83e-08	GGCTTTGGTGCAATGGATTTTAAAGCCTTGCAGGCCAGCAGGTCTGAGGTGCCCCTGGAC
Equus_ferus_caballus_papillomavirus_type_7_complete_genome_NC_020501.1	7619	5964	6023	NODE_142_length_1652_cov_2.527619	61	2	60	81.667	9.83e-08	GGCTTTGGTGCAATGGATTTTAAAGCCTTGCAGGCCAGCAGGTCTGAGGTGCCCCTGGAC
Equus_caballus_papillomavirus_8_strain_NCSU_complete_genome_KU963288.1	8155	3821	3877	NODE_9462_length_292_cov_1.116279	227	171	60	78.333	0.008	CCAAGCCCCAGCCCCCGCCCCAGCCC---GCCCACGCCGAGGCCGGGAGCGCCCAGCCCC
Equus_caballus_papillomavirus_8_strain_NCSU_complete_genome_NC_031756.1	8155	3821	3877	NODE_9462_length_292_cov_1.116279	227	171	60	78.333	0.008	CCAAGCCCCAGCCCCCGCCCCAGCCC---GCCCACGCCGAGGCCGGGAGCGCCCAGCCCC
Equus_caballus_papillomavirus_8_strain_NCSU_complete_genome_KU963288.1	8155	3820	3877	NODE_112_length_1838_cov_8.222601	384	328	59	84.746	3.02e-08	CCCCTGCCCCATCCC--GCCCGCACCCCCAGCCCCGGCCCCAGCCCCAGCCCCCGCCCC
Equus_caballus_papillomavirus_8_strain_NCSU_complete_genome_KU963288.1	8155	3819	3877	NODE_3430_length_429_cov_1.693182	316	260	59	79.661	0.000664	GCGCCAGCCCGGGCCCCAGCCCCGGCCCCAG-CCCAGCGCG-GCCACCCGCCAAGCCCC
Equus_caballus_papillomavirus_8_strain_NCSU_complete_genome_NC_031756.1	8155	3820	3877	NODE_112_length_1838_cov_8.222601	384	328	59	84.746	3.02e-08	CCCCTGCCCCATCCC--GCCCGCACCCCCAGCCCCGGCCCCAGCCCCAGCCCCCGCCCC
Equus_caballus_papillomavirus_8_strain_NCSU_complete_genome_NC_031756.1	8155	3819	3877	NODE_3430_length_429_cov_1.693182	316	260	59	79.661	0.000664	GCGCCAGCCCGGGCCCCAGCCCCGGCCCCAG-CCCAGCGCG-GCCACCCGCCAAGCCCC
Equine_papillomavirus_3_isolate_Haflinger_GU384895.1_complete_genome	7582	6178	6235	NODE_10444_length_279_cov_1.217822	222	279	58	75.862	0.008	ACACCCAGTGGGTCTCTGGTGTCCACTGATTCTCAGATTTTTAACAGGCCCTACTGGC
Equine_papillomavirus_3_complete_genome_NC_017862.1	7582	6178	6235	NODE_10444_length_279_cov_1.217822	222	279	58	75.862	0.008	ACACCCAGTGGGTCTCTGGTGTCCACTGATTCTCAGATTTTTAACAGGCCCTACTGGC
Equus_caballus_papillomavirus_1_strain_150904_complete_genome_MF288893.1	7613	855	907	NODE_10_length_5103_cov_2.636689	3266	3211	56	76.786	0.026	CAGGGAAATTCCCTAGCACTGTTCCAGCAGCAGCAGGCGAGGGAAACGGAGGAGCA
Equus_caballus_papillomavirus_1_isolate_G2_complete_genome_MN164462.1	7611	855	907	NODE_10_length_5103_cov_2.636689	3266	3211	56	75	0.32	CAGGGAAATTCCCTAGCACTGTTCCAGCAGCAGCAGGCGAGGGAAACGGAGGAGCA
Equus_caballus_papillomavirus_type_1_complete_genome_AF498323.1	7610	855	907	NODE_10_length_5103_cov_2.636689	3266	3211	56	76.786	0.026	CAGGGAAATTCCCTAGCACTGTTCCAGCAGCAGCAGGCGAGGGAAACGGAGGAGCA
Equus_caballus_papillomavirus_type_1_complete_genome_NC_003748.1	7610	855	907	NODE_10_length_5103_cov_2.636689	3266	3211	56	76.786	0.026	CAGGGAAATTCCCTAGCACTGTTCCAGCAGCAGCAGGCGAGGGAAACGGAGGAGCA
Equus_caballus_papillomavirus_8_strain_NCSU_complete_genome_KU963288.1	8155	3818	3871	NODE_9462_length_292_cov_1.116279	224	171	56	80.357	0.008	AGCCCCAGCCCCCGCCCCAGCCC--GCCCACGCCGAGGCCGGGAGCGCCCAGCCCC
Equus_caballus_papillomavirus_8_strain_NCSU_complete_genome_NC_031756.1	8155	3818	3871	NODE_9462_length_292_cov_1.116279	224	171	56	80.357	0.008	AGCCCCAGCCCCCGCCCCAGCCC--GCCCACGCCGAGGCCGGGAGCGCCCAGCCCC
Equus_ferus_caballus_papillomavirus_type_5_complete_genome_JQ031033.1	7519	2415	2467	NODE_1134_length_652_cov_0.645217	67	119	53	79.245	0.000612	ACTGATGCAAACTGGAGTTGTTTTTTTAAAAGGTTATGGGCGCGTATTGAGCT
Equus_ferus_caballus_papillomavirus_type_5_complete_genome_NC_020084.1	7519	2415	2467	NODE_1134_length_652_cov_0.645217	67	119	53	79.245	0.000612	ACTGATGCAAACTGGAGTTGTTTTTTTAAAAGGTTATGGGCGCGTATTGAGCT
Equine_papillomavirus_type_6_complete_genome_JQ965698.1	7551	1683	1735	NODE_10_length_5103_cov_2.636689	2453	2401	53	75.472	0.32	GAGGAGGCGATGAAATTTGAGTTTTCAGACATGGTGCAGTGGGCCTATGACAA
Equine_papillomavirus_type_6_complete_genome_NC_020500.1	7551	1683	1735	NODE_10_length_5103_cov_2.636689	2453	2401	53	75.472	0.32	GAGGAGGCGATGAAATTTGAGTTTTCAGACATGGTGCAGTGGGCCTATGACAA
Equine_papillomavirus_3_isolate_Haflinger_GU384895.1_complete_genome	7582	3306	3356	NODE_10122_length_283_cov_1.140777	156	206	51	76.471	0.092	GTCCCCTGCCCAGGGCCCGAGTCAGGGGGGCGGTGGCCGGGGGGGAGCTGG
Equine_papillomavirus_3_complete_genome_NC_017862.1	7582	3306	3356	NODE_10122_length_283_cov_1.140777	156	206	51	76.471	0.092	GTCCCCTGCCCAGGGCCCGAGTCAGGGGGGCGGTGGCCGGGGGGGAGCTGG
Equus_caballus_papillomavirus_8_strain_NCSU_complete_genome_KU963288.1	8155	3820	3868	NODE_112_length_1838_cov_8.222601	361	312	50	86	1.28e-06	CCCCAGCCCCGGCCCCAGCCCCAGCCCCCGCCCCCACCGGCGGCCCCAGC
Equus_caballus_papillomavirus_8_strain_NCSU_complete_genome_NC_031756.1	8155	3820	3868	NODE_112_length_1838_cov_8.222601	361	312	50	86	1.28e-06	CCCCAGCCCCGGCCCCAGCCCCAGCCCCCGCCCCCACCGGCGGCCCCAGC
Equus_caballus_papillomavirus_1_strain_150904_complete_genome_MF288893.1	7613	5136	5184	NODE_142_length_1652_cov_2.527619	729	681	49	79.592	0.002	CTTTGACCTGCACCCCTCACTCCTGAGGCGCAAGAGGAAACGGAGGTAT
Equus_caballus_papillomavirus_1_isolate_G2_complete_genome_MN164462.1	7611	5136	5181	NODE_142_length_1652_cov_2.527619	729	681	49	77.551	0.32	CTTTGACCTGCACCCCTCACTCCTGAGGCGCAAGAGGAAACGGAGGTAT
Equus_caballus_papillomavirus_type_1_complete_genome_AF498323.1	7610	5136	5181	NODE_142_length_1652_cov_2.527619	729	681	49	77.551	0.32	CTTTGACCTGCACCCCTCACTCCTGAGGCGCAAGAGGAAACGGAGGTAT
Equus_caballus_papillomavirus_type_1_complete_genome_NC_003748.1	7610	5136	5181	NODE_142_length_1652_cov_2.527619	729	681	49	77.551	0.32	CTTTGACCTGCACCCCTCACTCCTGAGGCGCAAGAGGAAACGGAGGTAT
Equus_caballus_papillomavirus_8_strain_NCSU_complete_genome_KU963288.1	8155	3832	3879	NODE_112_length_1838_cov_8.222601	384	338	49	83.673	0.000664	CCCCTGCCCCATCCC--GCCCGCACCCCCAGCCCCGGCCCCAGCCCCAG
Equus_caballus_papillomavirus_8_strain_NCSU_complete_genome_NC_031756.1	8155	3832	3879	NODE_112_length_1838_cov_8.222601	384	338	49	83.673	0.000664	CCCCTGCCCCATCCC--GCCCGCACCCCCAGCCCCGGCCCCAGCCCCAG
Equus_caballus_papillomavirus_8_strain_NCSU_complete_genome_KU963288.1	8155	3827	3874	NODE_1905_length_532_cov_1.105495	215	169	48	83.333	0.00019	CCGAGCCCC-GCGCCACCCCCAGCGCCACCCCCAGCGCCAGCCCCAGC
Equus_caballus_papillomavirus_8_strain_NCSU_complete_genome_NC_031756.1	8155	3827	3874	NODE_1905_length_532_cov_1.105495	215	169	48	83.333	0.00019	CCGAGCCCC-GCGCCACCCCCAGCGCCACCCCCAGCGCCAGCCCCAGC
Equus_ferus_caballus_papillomavirus_type_4_complete_genome_NC_020085.1	7554	3119	3161	NODE_5740_length_356_cov_1.050179	288	243	46	80.435	0.32	GGCCCGCCGCCTCCCCCTCCGGGCTCGCAGCGGGCCCCGCCGAGCC
Equus_ferus_caballus_papillomavirus_type_4_complete_genome_JQ031032.1	7554	3119	3161	NODE_5740_length_356_cov_1.050179	288	243	46	80.435	0.32	GGCCCGCCGCCTCCCCCTCCGGGCTCGCAGCGGGCCCCGCCGAGCC
Equus_ferus_caballus_papillomavirus_type_7_complete_genome_JX035935.1	7619	789	834	NODE_59_length_2527_cov_3.244898	1963	2008	46	78.261	0.092	GGAGGCACAGTGCAGCGACCCTGATAGCGGGGATGATGAGGGAGAC
Equus_ferus_caballus_papillomavirus_type_7_complete_genome_NC_020501.1	7619	789	834	NODE_59_length_2527_cov_3.244898	1963	2008	46	78.261	0.092	GGAGGCACAGTGCAGCGACCCTGATAGCGGGGATGATGAGGGAGAC
Equus_caballus_papillomavirus_9_strain_complete_genome_SW_MN117918.1	7656	56	100	NODE_10_length_5103_cov_2.636689	4791	4750	45	82.222	0.093	ATGTGTCATG-TCTTTC--TGCACCGCGCCCGCTGGTGGCATGCA
Equine_papillomavirus_3_isolate_Haflinger_GU384895.1_complete_genome	7582	1468	1511	NODE_7997_length_313_cov_1.576271	81	124	44	79.545	0.092	TAAGAAAGCTGCTCAAACCGCTGATGCTGATGCATTTGCTGCAA
Equine_papillomavirus_3_complete_genome_NC_017862.1	7582	1468	1511	NODE_7997_length_313_cov_1.576271	81	124	44	79.545	0.092	TAAGAAAGCTGCTCAAACCGCTGATGCTGATGCATTTGCTGCAA
Equus_ferus_caballus_papillomavirus_type_4_complete_genome_NC_020085.1	7554	2384	2426	NODE_1134_length_652_cov_0.645217	63	105	43	81.395	0.007	ATTGACTGATGCAAACTGGAGTTGTTTTTTTAAAAGGTTATGG
Equus_ferus_caballus_papillomavirus_type_4_complete_genome_JQ031032.1	7554	2384	2426	NODE_1134_length_652_cov_0.645217	63	105	43	81.395	0.007	ATTGACTGATGCAAACTGGAGTTGTTTTTTTAAAAGGTTATGG
Equus_caballus_papillomavirus_8_strain_NCSU_complete_genome_KU963288.1	8155	3840	3877	NODE_5673_length_358_cov_0.882562	163	123	41	80.488	0.34	CCAGGCCCCGCCCCAGCCCGGCCGGCCCTCGCCCCAGCCCC
Equus_caballus_papillomavirus_8_strain_NCSU_complete_genome_NC_031756.1	8155	3840	3877	NODE_5673_length_358_cov_0.882562	163	123	41	80.488	0.34	CCAGGCCCCGCCCCAGCCCGGCCGGCCCTCGCCCCAGCCCC
Equus_caballus_papillomavirus_9_strain_complete_genome_SW_MN117918.1	7656	4497	4535	NODE_5521_length_362_cov_0.764912	170	131	40	82.5	0.32	TTTGTGTTTTGTGTGTTTTTTCCCCAATTTTTTTGTTTTA
Equus_ferus_caballus_papillomavirus_type_5_complete_genome_JQ031033.1	7519	2426	2463	NODE_21050_length_235_cov_0.784810	16	53	38	81.579	0.32	TTGCAATTCACTTGTTAAAAGGTTACAAACAAGTTTAG
Equus_ferus_caballus_papillomavirus_type_5_complete_genome_NC_020084.1	7519	2426	2463	NODE_21050_length_235_cov_0.784810	16	53	38	81.579	0.32	TTGCAATTCACTTGTTAAAAGGTTACAAACAAGTTTAG
Equus_caballus_papillomavirus_8_strain_NCSU_complete_genome_KU963288.1	8155	3819	3856	NODE_1905_length_532_cov_1.105495	206	169	38	86.842	0.000664	GCGCCACCCCCAGCGCCACCCCCAGCGCCAGCCCCAGC
Equus_caballus_papillomavirus_8_strain_NCSU_complete_genome_NC_031756.1	8155	3819	3856	NODE_1905_length_532_cov_1.105495	206	169	38	86.842	0.000664	GCGCCACCCCCAGCGCCACCCCCAGCGCCAGCCCCAGC
Equus_ferus_caballus_papillomavirus_type_4_complete_genome_NC_020085.1	7554	4206	4239	NODE_57_length_2540_cov_2.874137	2513	2477	37	83.784	0.091	TGCTCAGGGGGGCGGCAGTGTCCGCGTGGGCACCCCC
Equus_ferus_caballus_papillomavirus_type_4_complete_genome_JQ031032.1	7554	4206	4239	NODE_57_length_2540_cov_2.874137	2513	2477	37	83.784	0.091	TGCTCAGGGGGGCGGCAGTGTCCGCGTGGGCACCCCC
Equus_caballus_papillomavirus_1_strain_150904_complete_genome_MF288893.1	7613	855	890	NODE_59_length_2527_cov_3.244898	2060	2095	36	83.333	0.092	CAGGGAAATTCCCTATCTCTATACCAGCAGCAGGAG
Equus_caballus_papillomavirus_type_1_complete_genome_AF498323.1	7610	855	890	NODE_59_length_2527_cov_3.244898	2060	2095	36	83.333	0.092	CAGGGAAATTCCCTATCTCTATACCAGCAGCAGGAG
Equus_caballus_papillomavirus_type_1_complete_genome_NC_003748.1	7610	855	890	NODE_59_length_2527_cov_3.244898	2060	2095	36	83.333	0.092	CAGGGAAATTCCCTATCTCTATACCAGCAGCAGGAG
Equine_papillomavirus_3_isolate_Haflinger_GU384895.1_complete_genome	7582	1671	1705	NODE_3380_length_431_cov_1.542373	83	49	35	94.286	1.19e-06	TCACAAATGGTGCAGTGGGCCTATGACAATAACTA
Equine_papillomavirus_3_isolate_Haflinger_GU384895.1_complete_genome	7582	3529	3563	NODE_44_length_2765_cov_2.798363	985	951	35	85.714	0.026	GGGAAGCCTAATCAGCTTAAATGTATGCGCTATCG
Equine_papillomavirus_3_complete_genome_NC_017862.1	7582	1671	1705	NODE_3380_length_431_cov_1.542373	83	49	35	94.286	1.19e-06	TCACAAATGGTGCAGTGGGCCTATGACAATAACTA
Equine_papillomavirus_3_complete_genome_NC_017862.1	7582	3529	3563	NODE_44_length_2765_cov_2.798363	985	951	35	85.714	0.026	GGGAAGCCTAATCAGCTTAAATGTATGCGCTATCG
Equus_ferus_caballus_papillomavirus_type_5_complete_genome_JQ031033.1	7519	2370	2404	NODE_13796_length_255_cov_0.696629	158	124	35	82.857	0.32	AACCCCTTTTTGATTGATGAAAATTGCATTCGGGT
Equus_ferus_caballus_papillomavirus_type_5_complete_genome_NC_020084.1	7519	2370	2404	NODE_13796_length_255_cov_0.696629	158	124	35	82.857	0.32	AACCCCTTTTTGATTGATGAAAATTGCATTCGGGT
Equus_caballus_papillomavirus_8_strain_NCSU_complete_genome_KU963288.1	8155	3819	3853	NODE_2990_length_451_cov_12.871658	282	316	35	82.857	0.34	GCCGCAGCCCCCACCCCGCCCCCCGCCCCAGCCCC
Equus_caballus_papillomavirus_8_strain_NCSU_complete_genome_NC_031756.1	8155	3819	3853	NODE_2990_length_451_cov_12.871658	282	316	35	82.857	0.34	GCCGCAGCCCCCACCCCGCCCCCCGCCCCAGCCCC
Equus_caballus_papillomavirus_2_isolate_XJ-ks1391_complete_genome_MW410986.1	7802	1441	1474	NODE_10_length_5103_cov_2.636689	2902	2935	34	88.235	0.002	CTGGCACGCAGCACGTCCAAGTGCTGCGTGCCAG
Equine_papillomavirus_2_isolate_Zurich_2009_HM461973.1_complete_genome	7803	1442	1475	NODE_10_length_5103_cov_2.636689	2902	2935	34	88.235	0.002	CTGGCACGCAGCACGTCCAAGTGCTGCGTGCCAG
Equine_papillomavirus_2_complete_genome_EU503122.1	7802	1441	1474	NODE_10_length_5103_cov_2.636689	2902	2935	34	88.235	0.002	CTGGCACGCAGCACGTCCAAGTGCTGCGTGCCAG
Equine_papillomavirus_2_complete_genome_NC_012123.1	7802	1441	1474	NODE_10_length_5103_cov_2.636689	2902	2935	34	88.235	0.002	CTGGCACGCAGCACGTCCAAGTGCTGCGTGCCAG
Equus_caballus_papillomavirus_9_strain_complete_genome_SW_MN117918.1	7656	6264	6296	NODE_23485_length_228_cov_0.814570	146	178	33	90.909	0.000624	CAGTGAGCGTTTGCTCACTGTGGGCCATCCCTA
Equus_ferus_caballus_papillomavirus_type_7_complete_genome_JX035935.1	7619	4037	4067	NODE_22038_length_232_cov_0.800000	159	128	32	87.5	0.32	GACAGGACTCCAGCAATGGTTCAGCTATGTGA
Equus_ferus_caballus_papillomavirus_type_7_complete_genome_NC_020501.1	7619	4037	4067	NODE_22038_length_232_cov_0.800000	159	128	32	87.5	0.32	GACAGGACTCCAGCAATGGTTCAGCTATGTGA
Equus_caballus_papillomavirus_1_strain_150904_complete_genome_MF288893.1	7613	6138	6168	NODE_10444_length_279_cov_1.217822	249	279	31	87.097	0.092	GATTCTCAGATTTTTAACAGGCCCTACTGGC
Equus_caballus_papillomavirus_1_isolate_G2_complete_genome_MN164462.1	7611	6135	6165	NODE_10444_length_279_cov_1.217822	249	279	31	87.097	0.092	GATTCTCAGATTTTTAACAGGCCCTACTGGC
Equus_caballus_papillomavirus_type_1_complete_genome_AF498323.1	7610	6135	6165	NODE_10444_length_279_cov_1.217822	249	279	31	87.097	0.092	GATTCTCAGATTTTTAACAGGCCCTACTGGC
Equus_caballus_papillomavirus_type_1_complete_genome_NC_003748.1	7610	6135	6165	NODE_10444_length_279_cov_1.217822	249	279	31	87.097	0.092	GATTCTCAGATTTTTAACAGGCCCTACTGGC
Equine_papillomavirus_3_isolate_Haflinger_GU384895.1_complete_genome	7582	5276	5306	NODE_23485_length_228_cov_0.814570	1	31	31	87.097	0.092	GCGCAAACGGGGCTTTTTTTCTTTTTCAGAT
Equine_papillomavirus_3_complete_genome_NC_017862.1	7582	5276	5306	NODE_23485_length_228_cov_0.814570	1	31	31	87.097	0.092	GCGCAAACGGGGCTTTTTTTCTTTTTCAGAT
Equus_caballus_papillomavirus_8_strain_NCSU_complete_genome_KU963288.1	8155	3849	3879	NODE_3430_length_429_cov_1.693182	316	286	31	90.323	0.008	GCGCCAGCCCGGGCCCCAGCCCCGGCCCCAG
Equus_caballus_papillomavirus_8_strain_NCSU_complete_genome_NC_031756.1	8155	3849	3879	NODE_3430_length_429_cov_1.693182	316	286	31	90.323	0.008	GCGCCAGCCCGGGCCCCAGCCCCGGCCCCAG
Equus_caballus_papillomavirus_2_isolate_XJ-ks1391_complete_genome_MW410986.1	7802	4418	4446	NODE_11193_length_270_cov_1.129534	181	210	30	90	0.33	GGTGGCCGCAGTGTCCGCGTGGAGCACCCC
Equine_papillomavirus_2_isolate_Zurich_2009_HM461973.1_complete_genome	7803	4419	4447	NODE_11193_length_270_cov_1.129534	181	210	30	90	0.33	GGTGGCCGCAGTGTCCGCGTGGAGCACCCC
Equine_papillomavirus_2_complete_genome_EU503122.1	7802	4418	4446	NODE_11193_length_270_cov_1.129534	181	210	30	90	0.33	GGTGGCCGCAGTGTCCGCGTGGAGCACCCC
Equine_papillomavirus_2_complete_genome_NC_012123.1	7802	4418	4446	NODE_11193_length_270_cov_1.129534	181	210	30	90	0.33	GGTGGCCGCAGTGTCCGCGTGGAGCACCCC
Equus_ferus_caballus_papillomavirus_type_5_complete_genome_JQ031033.1	7519	6873	6902	NODE_12550_length_260_cov_1.131148	72	43	30	86.667	0.32	AGAAGAAACTAAGTCATCTTTTTTCTTTTT
Equus_ferus_caballus_papillomavirus_type_5_complete_genome_NC_020084.1	7519	6873	6902	NODE_12550_length_260_cov_1.131148	72	43	30	86.667	0.32	AGAAGAAACTAAGTCATCTTTTTTCTTTTT
Equus_caballus_papillomavirus_8_strain_NCSU_complete_genome_KU963288.1	8155	3818	3847	NODE_112_length_1838_cov_8.222601	357	328	30	93.333	0.000664	AGCCCCGGCCCCAGCCCCAGCCCCCGCCCC
Equus_caballus_papillomavirus_8_strain_NCSU_complete_genome_KU963288.1	8155	2622	2651	NODE_2913_length_455_cov_0.917989	411	439	30	90	0.34	AAGCAACAGCTTCAC-TGTCAAATAACACA
Equus_caballus_papillomavirus_8_strain_NCSU_complete_genome_NC_031756.1	8155	3818	3847	NODE_112_length_1838_cov_8.222601	357	328	30	93.333	0.000664	AGCCCCGGCCCCAGCCCCAGCCCCCGCCCC
Equus_caballus_papillomavirus_8_strain_NCSU_complete_genome_NC_031756.1	8155	2622	2651	NODE_2913_length_455_cov_0.917989	411	439	30	90	0.34	AAGCAACAGCTTCAC-TGTCAAATAACACA
Equus_caballus_papillomavirus_8_strain_NCSU_complete_genome_KU963288.1	8155	3818	3846	NODE_3430_length_429_cov_1.693182	311	283	29	89.655	0.099	AGCCCGGGCCCCAGCCCCGGCCCCAGCCC
Equus_caballus_papillomavirus_8_strain_NCSU_complete_genome_KU963288.1	8155	3812	3840	NODE_3430_length_429_cov_1.693182	311	283	29	89.655	0.099	AGCCCGGGCCCCAGCCCCGGCCCCAGCCC
Equus_caballus_papillomavirus_8_strain_NCSU_complete_genome_NC_031756.1	8155	3818	3846	NODE_3430_length_429_cov_1.693182	311	283	29	89.655	0.099	AGCCCGGGCCCCAGCCCCGGCCCCAGCCC
Equus_caballus_papillomavirus_8_strain_NCSU_complete_genome_NC_031756.1	8155	3812	3840	NODE_3430_length_429_cov_1.693182	311	283	29	89.655	0.099	AGCCCGGGCCCCAGCCCCGGCCCCAGCCC
Equus_ferus_caballus_papillomavirus_type_7_complete_genome_JX035935.1	7619	3798	3825	NODE_6718_length_335_cov_1.321705	235	262	28	89.286	0.32	TAAGCTCTGCATTGTCTTTTTTTAGTGT
Equus_ferus_caballus_papillomavirus_type_7_complete_genome_NC_020501.1	7619	3798	3825	NODE_6718_length_335_cov_1.321705	235	262	28	89.286	0.32	TAAGCTCTGCATTGTCTTTTTTTAGTGT
Equus_caballus_papillomavirus_8_strain_NCSU_complete_genome_KU963288.1	8155	3672	3699	NODE_5041_length_374_cov_0.936027	259	232	28	92.857	0.008	CGAGCCCGAGCCCGAGCCCGAGCCTGGA
Equus_caballus_papillomavirus_8_strain_NCSU_complete_genome_KU963288.1	8155	3307	3334	NODE_22380_length_231_cov_0.805195	194	167	28	89.286	0.34	CCGTGGGACCCCCAGCCCCGCGCCGACG
Equus_caballus_papillomavirus_8_strain_NCSU_complete_genome_NC_031756.1	8155	3672	3699	NODE_5041_length_374_cov_0.936027	259	232	28	92.857	0.008	CGAGCCCGAGCCCGAGCCCGAGCCTGGA
Equus_caballus_papillomavirus_8_strain_NCSU_complete_genome_NC_031756.1	8155	3307	3334	NODE_22380_length_231_cov_0.805195	194	167	28	89.286	0.34	CCGTGGGACCCCCAGCCCCGCGCCGACG
Equus_caballus_papillomavirus_9_strain_complete_genome_SW_MN117918.1	7656	4713	4740	NODE_23010_length_229_cov_0.815789	210	183	28	89.286	0.32	CCGCCCGATGTGAGACCCGCCGTGGAAG
Equus_caballus_papillomavirus_8_strain_NCSU_complete_genome_KU963288.1	8155	3833	3859	NODE_6077_length_349_cov_0.613971	243	269	27	100	5.45e-05	CCCAGCCCCAGCCCCAGCCCCAGCCCG
Equus_caballus_papillomavirus_8_strain_NCSU_complete_genome_NC_031756.1	8155	3833	3859	NODE_6077_length_349_cov_0.613971	243	269	27	100	5.45e-05	CCCAGCCCCAGCCCCAGCCCCAGCCCG
Equus_caballus_papillomavirus_8_strain_NCSU_complete_genome_KU963288.1	8155	3821	3846	NODE_6077_length_349_cov_0.613971	243	268	26	100	0.00019	CCCAGCCCCAGCCCCAGCCCCAGCCC
Equus_caballus_papillomavirus_8_strain_NCSU_complete_genome_KU963288.1	8155	3827	3852	NODE_6077_length_349_cov_0.613971	243	268	26	100	0.00019	CCCAGCCCCAGCCCCAGCCCCAGCCC
Equus_caballus_papillomavirus_8_strain_NCSU_complete_genome_KU963288.1	8155	3839	3864	NODE_6077_length_349_cov_0.613971	243	268	26	96.154	0.008	CCCAGCCCCAGCCCCAGCCCCAGCCC
Equus_caballus_papillomavirus_8_strain_NCSU_complete_genome_KU963288.1	8155	3845	3870	NODE_6077_length_349_cov_0.613971	243	268	26	96.154	0.008	CCCAGCCCCAGCCCCAGCCCCAGCCC
Equus_caballus_papillomavirus_8_strain_NCSU_complete_genome_KU963288.1	8155	3851	3876	NODE_6077_length_349_cov_0.613971	243	268	26	96.154	0.008	CCCAGCCCCAGCCCCAGCCCCAGCCC
Equus_caballus_papillomavirus_8_strain_NCSU_complete_genome_NC_031756.1	8155	3821	3846	NODE_6077_length_349_cov_0.613971	243	268	26	100	0.00019	CCCAGCCCCAGCCCCAGCCCCAGCCC
Equus_caballus_papillomavirus_8_strain_NCSU_complete_genome_NC_031756.1	8155	3827	3852	NODE_6077_length_349_cov_0.613971	243	268	26	100	0.00019	CCCAGCCCCAGCCCCAGCCCCAGCCC
Equus_caballus_papillomavirus_8_strain_NCSU_complete_genome_NC_031756.1	8155	3839	3864	NODE_6077_length_349_cov_0.613971	243	268	26	96.154	0.008	CCCAGCCCCAGCCCCAGCCCCAGCCC
Equus_caballus_papillomavirus_8_strain_NCSU_complete_genome_NC_031756.1	8155	3845	3870	NODE_6077_length_349_cov_0.613971	243	268	26	96.154	0.008	CCCAGCCCCAGCCCCAGCCCCAGCCC
Equus_caballus_papillomavirus_8_strain_NCSU_complete_genome_NC_031756.1	8155	3851	3876	NODE_6077_length_349_cov_0.613971	243	268	26	96.154	0.008	CCCAGCCCCAGCCCCAGCCCCAGCCC
Equine_papillomavirus_type_6_complete_genome_JQ965698.1	7551	6845	6869	NODE_7384_length_324_cov_0.611336	114	91	25	96	0.32	AATAAATTTTAATT-TTTTACAAAT
Equine_papillomavirus_type_6_complete_genome_NC_020500.1	7551	6845	6869	NODE_7384_length_324_cov_0.611336	114	91	25	96	0.32	AATAAATTTTAATT-TTTTACAAAT
Equus_caballus_papillomavirus_8_strain_NCSU_complete_genome_KU963288.1	8155	3671	3695	NODE_4755_length_381_cov_1.049342	86	62	25	92	0.34	GCGCGCCCGAGCCCGAGCCGGACCC
Equus_caballus_papillomavirus_8_strain_NCSU_complete_genome_NC_031756.1	8155	3671	3695	NODE_4755_length_381_cov_1.049342	86	62	25	92	0.34	GCGCGCCCGAGCCCGAGCCGGACCC
Equus_caballus_papillomavirus_8_strain_NCSU_complete_genome_KU963288.1	8155	3818	3840	NODE_6077_length_349_cov_0.613971	246	268	23	100	0.008	AGCCCCAGCCCCAGCCCCAGCCC
Equus_caballus_papillomavirus_8_strain_NCSU_complete_genome_KU963288.1	8155	3857	3879	NODE_6077_length_349_cov_0.613971	243	265	23	95.652	0.34	CCCAGCCCCAGCCCCAGCCCCAG
Equus_caballus_papillomavirus_8_strain_NCSU_complete_genome_KU963288.1	8155	6960	6982	NODE_4455_length_390_cov_0.987220	78	100	23	95.652	0.34	CTCTGTGTACAGCAGCACACCCT
Equus_caballus_papillomavirus_8_strain_NCSU_complete_genome_NC_031756.1	8155	3818	3840	NODE_6077_length_349_cov_0.613971	246	268	23	100	0.008	AGCCCCAGCCCCAGCCCCAGCCC
Equus_caballus_papillomavirus_8_strain_NCSU_complete_genome_NC_031756.1	8155	3857	3879	NODE_6077_length_349_cov_0.613971	243	265	23	95.652	0.34	CCCAGCCCCAGCCCCAGCCCCAG
Equus_caballus_papillomavirus_8_strain_NCSU_complete_genome_NC_031756.1	8155	6960	6982	NODE_4455_length_390_cov_0.987220	78	100	23	95.652	0.34	CTCTGTGTACAGCAGCACACCCT
Equus_caballus_papillomavirus_1_strain_150904_complete_genome_MF288893.1	7613	4697	4717	NODE_8049_length_312_cov_1.578723	15	35	21	100	0.092	CCAGAGGGGTTTCTGTGTCCC
Equus_caballus_papillomavirus_1_isolate_G2_complete_genome_MN164462.1	7611	4697	4717	NODE_8049_length_312_cov_1.578723	15	35	21	100	0.092	CCAGAGGGGTTTCTGTGTCCC
Equus_caballus_papillomavirus_type_1_complete_genome_AF498323.1	7610	4697	4717	NODE_8049_length_312_cov_1.578723	15	35	21	100	0.092	CCAGAGGGGTTTCTGTGTCCC
Equus_caballus_papillomavirus_type_1_complete_genome_NC_003748.1	7610	4697	4717	NODE_8049_length_312_cov_1.578723	15	35	21	100	0.092	CCAGAGGGGTTTCTGTGTCCC
Equus_caballus_papillomavirus_9_strain_complete_genome_SW_MN117918.1	7656	5366	5385	NODE_560_length_881_cov_10.463930	315	296	20	100	0.32	GCGCGCAGCCGGGCCTCGGC

## Sheet: ID2396_8-8
qseq ID	qlen	qstart	qend	subject ID	sstart	send	len	pident	evalue	seq
Equus_caballus_papillomavirus_2_isolate_XJ-ks1391_complete_genome_MW410986.1	7802	2646	7802	NODE_3_length_7874_cov_92.774785	7874	2718	5157	99.515	0	CCCTTCCCTCTTGATGAAAACCAGCAGCCCGTATTTGAATTAACTGTGAAAAATTGGAAATCTCTTTTTAAAAGGTTGTGGCAGCGCTTAGAATTGAGTGACCAGGAGGACGAGGGAGACGATGGAGAACCTACACAGGGCTTTAGATGCACTGGCCGAAAGACAAATGACTTTGTATGAGCGGGGGAGCACAAATCTAGTCGACCATCTGGACCTCTGGTTTTGTCAGAGAAAGGAAAATGTCATGCTGCATGCCGCTCGGAAGCACGGTGTGCAGCGTGTCGGCTGCCTGCCAGTGCCTTCGCTGGCCACGTCCGCAGCTAAGGCCAAAGGGGCCATTGGTATGACCTTACTTATCGAAAGCCTGCTTAAGTCGCCCTTTGCAGGCGAGCCCTGGAG…
Equine_papillomavirus_2_isolate_Zurich_2009_HM461973.1_complete_genome	7803	2647	7803	NODE_3_length_7874_cov_92.774785	7874	2718	5157	98.74	0	CCCTTCCCTCTTGATGAAAACCAGCAGCCCGTATTTGAATTAACTGTGAAAAATTGGAAATCTCTTTTTAAAAGGTTGTGGCAGCGCTTAGAATTGAGTGACCAGGAGGACGAGGGAGACGATGGAGAACCTACACAGGGCTTTAGATGCACTGGCCGAAAGACAAATGACTTTGTATGAGCGGGGGAGCACAAATCTAGTCGACCATCTGGACCTCTGGTTTTGTCAGAGAAAGGAAAATGTCATGCTGCATGCCGCTCGGAAGCACGGTGTGCAGCGTGTCGGCTGCCTGCCAGTGCCTTCGCTGGCCACGTCCGCAGCTAAGGCCAAAGGGGCCATTGGTATGACCTTACTTATCGAAAGCCTGCTTAAGTCGCCCTTTGCAGGCGAGCCCTGGAG…
Equine_papillomavirus_2_complete_genome_EU503122.1	7802	2646	7802	NODE_3_length_7874_cov_92.774785	7874	2718	5157	99.496	0	CCCTTCCCTCTTGATGAAAACCAGCAGCCCGTATTTGAATTAACTGTGAAAAATTGGAAATCTCTTTTTAAAAGGTTGTGGCAGCGCTTAGAATTGAGTGACCAGGAGGACGAGGGAGACGATGGAGAACCTACACAGGGCTTTAGATGCACTGGCCGAAAGACAAATGACTTTGTATGAGCGGGGGAGCACAAATCTAGTCGACCATCTGGACCTCTGGTTTTGTCAGAGAAAGGAAAATGTCATGCTGCATGCCGCTCGGAAGCACGGTGTGCAGCGTGTCGGCTGCCTGCCAGTGCCTTCGCTGGCCACGTCCGCAGCTAAGGCCAAAGGGGCCATTGGTATGACCTTACTTATCGAAAGCCTGCTTAAGTCGCCCTTTGCAGGCGAGCCCTGGAG…
Equine_papillomavirus_2_complete_genome_NC_012123.1	7802	2646	7802	NODE_3_length_7874_cov_92.774785	7874	2718	5157	99.496	0	CCCTTCCCTCTTGATGAAAACCAGCAGCCCGTATTTGAATTAACTGTGAAAAATTGGAAATCTCTTTTTAAAAGGTTGTGGCAGCGCTTAGAATTGAGTGACCAGGAGGACGAGGGAGACGATGGAGAACCTACACAGGGCTTTAGATGCACTGGCCGAAAGACAAATGACTTTGTATGAGCGGGGGAGCACAAATCTAGTCGACCATCTGGACCTCTGGTTTTGTCAGAGAAAGGAAAATGTCATGCTGCATGCCGCTCGGAAGCACGGTGTGCAGCGTGTCGGCTGCCTGCCAGTGCCTTCGCTGGCCACGTCCGCAGCTAAGGCCAAAGGGGCCATTGGTATGACCTTACTTATCGAAAGCCTGCTTAAGTCGCCCTTTGCAGGCGAGCCCTGGAG…
Equus_caballus_papillomavirus_2_isolate_XJ-ks1391_complete_genome_MW410986.1	7802	1	2722	NODE_3_length_7874_cov_92.774785	2717	1	2723	99.082	0	CGAGATGCCAAGCAGGCCAGTGCCCGCCAAGAGCTTTGGCGCTCTCTTCTGGTTACTTTGGCGCTGCACCCAGCCAATCTGCAGACTGGGTCTTTGTGAGTCAGCGAATCCTCTGCGGTGCACAGAGCCTTTTTCTAGAGAAGATTGTTGTGGACCACAATCATTAAGATATGCAGGAGGCCCCTGCATCGGAGACGTTCCGCGGAGCTCCAGAGG---AGTGAAGACTGCTGGCCACATGTCGATCGTTGGCCTTCTTTGCATCTTTTGTGGAAAGCCGTGTGGCTATGCTGATGACATTTGGTGGAACACAGCAGACCTGAACCTGGTTATGAGAGACGGCAAGCGCAAGGCCAGCTGCCAGACCTGCATGAGAGCAGCCTGCACGCTTGAGCGCCA…
Equine_papillomavirus_2_complete_genome_EU503122.1	7802	1	2722	NODE_3_length_7874_cov_92.774785	2717	1	2723	99.119	0	CGAGATGCCAAGCAGGCCAGTGCCCGCCAAGAGCTTTGGCGCTCTCTTCTGGTTACTTTGGCGCTGCACCCAGCCAATCTGCAGACTGGGTCTTTGTGAGTCAGCGAATCCTCTGCGGTGCACAGAGCCTTTTTCTAGAGAAGATTGTTGTGGACCACAATCATTAAGATATGCAGGAGGCCCCTGCATCGGAGACGTTCCGCGGAGCTCCAGAGG---AGTGAAGACTGCTGGCCACATGTCGATCGTTGGCCTTCTTTGCATCTTTTGTGGAAAGCCGTGTGGCTATGCTGATGACATTTGGTGGAACACAGCAGACCTGAACCTGGTTATGAGAGACGGCAAGCGCAAGGCCAGCTGCCAGACCTGCATGAGAGCAGCCTGCACGCTTGAGCGCCA…
Equine_papillomavirus_2_complete_genome_NC_012123.1	7802	1	2722	NODE_3_length_7874_cov_92.774785	2717	1	2723	99.119	0	CGAGATGCCAAGCAGGCCAGTGCCCGCCAAGAGCTTTGGCGCTCTCTTCTGGTTACTTTGGCGCTGCACCCAGCCAATCTGCAGACTGGGTCTTTGTGAGTCAGCGAATCCTCTGCGGTGCACAGAGCCTTTTTCTAGAGAAGATTGTTGTGGACCACAATCATTAAGATATGCAGGAGGCCCCTGCATCGGAGACGTTCCGCGGAGCTCCAGAGG---AGTGAAGACTGCTGGCCACATGTCGATCGTTGGCCTTCTTTGCATCTTTTGTGGAAAGCCGTGTGGCTATGCTGATGACATTTGGTGGAACACAGCAGACCTGAACCTGGTTATGAGAGACGGCAAGCGCAAGGCCAGCTGCCAGACCTGCATGAGAGCAGCCTGCACGCTTGAGCGCCA…
Equine_papillomavirus_2_isolate_Zurich_2009_HM461973.1_complete_genome	7803	2	2723	NODE_3_length_7874_cov_92.774785	2716	1	2722	98.898	0	GAGATGCCAAGCAGGCCAGTGCCCGCCAAGAGCTTTGGCGCTCTCTTCTGGTTACTTTGGCGCTGCACCCAGCCAATCTGCAGACTGGGTCTTTGTGAGTCAGCGAATCCTCTGCGGTGCACAGAGCCTTTTTCTAGAGAAGATTGTTGTGGACCACAATCATTAAGATATGCAGGAGGCCCCTGCATCGGAGACGTTCCGCGGAGCTCCAGAGG---AGTGAAGACTGCTGGCCACATGTCGATCGTTGGCCTTCTTTGCATCTTTTGTGGAAAGCCGTGTGGCTATGCTGATGACATTTGGTGGAACACAGCAGACCTGAACCTGGTTATGAGAGACGGCAAGCGCAAGGCCAGCTGCCAGACCTGCATGAGAGCAGCCTGCACGCTTGAGCGCCAT…
Equus_caballus_papillomavirus_9_strain_complete_genome_SW_MN117918.1	7656	6087	7654	NODE_3_length_7874_cov_92.774785	4911	3350	1587	70.762	0	TTCGATCTGCACCCCTCCCTGCACCCCCGCAAACGCAAACGGCGGTACAATTGCTGTTTTGCAGATGGCTTTCTGGACAATGAACAGACAACACCTGTACCTACCCCCCAATCCCGTCTCTAGGGTTTTGGGGACTGATGAGTATGTGAAGCGGCTGTCGGTGTTCTATCATGGTAACAGCGAGCGTATGCTCATGGTGGGCCACCCCTTCTTTGCCCTCAAAAATGACAGGGACAAGCTGGACGTTCCCAAGGTGTCCTCTAATCAGTACAGGGTGTTTGAGGTAGTTCTCCCAAATCCCAACAAATTTGCTCTTGCAGATCAGAACATTTACAACCCAGAGACCTCCAGACTTGTCTGGGCTCTCCGCGGTGTCGAGGTGTCACGGGGGCAGCCTCT…
Equus_caballus_papillomavirus_9_strain_complete_genome_SW_MN117918.1	7656	1646	3086	NODE_3_length_7874_cov_92.774785	1457	2	1476	65.176	4.07e-72	CCTCAAGTGAAGAGGCGGCTCTTCGAGCCCCC-GCAACCGGGAAGCGGGGGGCGTCCGGGTGTAAGCTATGAAGCTCACGGTTTTTACAGCAGGACGGACCTTCAGGTAGAGACACCGCTGGGCATACAGGGTGGACGGGTCC--CTCTGCGGAGCATAGAGAATGTGGACAGTCACGC--TGGCACGCAGCACTTGGACGTGCTGCGTGCCAGTAACAGGGAGGCGGCCATGTTAGGCCGCTTTAA-GA--CCTGTTTTGAAGTGGGATTTAATGAATTGACAAGGCCTTTTACTAGCAACAAGACCTGTGCCAAGCAGTGGGTGGTGCTTGTGTATTCTGTTCGGGAAGCCCTTTTTGAAGCAGCAAAAGAACTGCTGCGACAGCACTGTGACTATG…
Equus_ferus_caballus_papillomavirus_type_4_complete_genome_NC_020085.1	7554	5398	6639	NODE_3_length_7874_cov_92.774785	4878	3619	1278	65.884	2.71e-74	CGCAAACGGCGGTACAATTGCTGTTTTGCAGATGGCTTTCTGGACAATGAACAGACAACACCTGTACCTACCCCCCAATCCCGTCTCTAGGGTTTTGGGGACTGATGAGTATGTGAAGCGGCTGTCGGTGTTCTATCATGGTAACAGCGAGCGTATGCTCATGGTGGGCCACCCCTTCTTTGCCCTCAAAAATGACAGGGACAAGCTGGACGTTCCCAAGGTGTCCTCTAATCAGTACAGGGTGTTTGAGGTAGTTCTCCCAAATCCCAACAAATTTGCTCTTGCAGATCAGAACATTTACAACCCAGAGACCTCCAGACTTGTCTGGGCTCTCCGCGGTGTCGAGGTGTCACGGGGGCAGCCTCTGGGCATCGGGGTGACAGGAAGCACAGTGTTTAA…
Equus_ferus_caballus_papillomavirus_type_4_complete_genome_JQ031032.1	7554	5398	6639	NODE_3_length_7874_cov_92.774785	4878	3619	1278	65.884	2.71e-74	CGCAAACGGCGGTACAATTGCTGTTTTGCAGATGGCTTTCTGGACAATGAACAGACAACACCTGTACCTACCCCCCAATCCCGTCTCTAGGGTTTTGGGGACTGATGAGTATGTGAAGCGGCTGTCGGTGTTCTATCATGGTAACAGCGAGCGTATGCTCATGGTGGGCCACCCCTTCTTTGCCCTCAAAAATGACAGGGACAAGCTGGACGTTCCCAAGGTGTCCTCTAATCAGTACAGGGTGTTTGAGGTAGTTCTCCCAAATCCCAACAAATTTGCTCTTGCAGATCAGAACATTTACAACCCAGAGACCTCCAGACTTGTCTGGGCTCTCCGCGGTGTCGAGGTGTCACGGGGGCAGCCTCTGGGCATCGGGGTGACAGGAAGCACAGTGTTTAA…
Equus_ferus_caballus_papillomavirus_type_5_complete_genome_JQ031033.1	7519	5398	6634	NODE_3_length_7874_cov_92.774785	4861	3604	1271	65.696	3.08e-67	TTGCTGTTTTGCAGATGGCTTTCTGGACAATGAACAGACAACACCTGTACCTACCCCCCAATCCCGTCTCTAGGGTTTTGGGGACTGATGAGTATGTGAAGCGGCTGTCGGTGTTCTATCATGGTAACAGCGAGCGTATGCTCATGGTGGGCCACCCCTTCTTTGCCCTCAAAAATGACAGGGACAAGCTGGACGTTCCCAAGGTGTCCTCTAATCAGTACAGGGTGTTTGAGGTAGTTCTCCCAAATCCCAACAAATTTGCTCTTGCAGATCAGAACATTTACAACCCAGAGACCTCCAGACTTGTCTGGGCTCTCCGCGGTGTCGAGGTGTCACGGGGGCAGCCTCTGGGCATCGGGGTGACAGGAAG-CACAGTGTTTAACAAGCTGTATGATGTA…
Equus_ferus_caballus_papillomavirus_type_5_complete_genome_NC_020084.1	7519	5398	6634	NODE_3_length_7874_cov_92.774785	4861	3604	1271	65.696	3.08e-67	TTGCTGTTTTGCAGATGGCTTTCTGGACAATGAACAGACAACACCTGTACCTACCCCCCAATCCCGTCTCTAGGGTTTTGGGGACTGATGAGTATGTGAAGCGGCTGTCGGTGTTCTATCATGGTAACAGCGAGCGTATGCTCATGGTGGGCCACCCCTTCTTTGCCCTCAAAAATGACAGGGACAAGCTGGACGTTCCCAAGGTGTCCTCTAATCAGTACAGGGTGTTTGAGGTAGTTCTCCCAAATCCCAACAAATTTGCTCTTGCAGATCAGAACATTTACAACCCAGAGACCTCCAGACTTGTCTGGGCTCTCCGCGGTGTCGAGGTGTCACGGGGGCAGCCTCTGGGCATCGGGGTGACAGGAAG-CACAGTGTTTAACAAGCTGTATGATGTA…
Equus_caballus_papillomavirus_9_strain_complete_genome_SW_MN117918.1	7656	4639	5433	NODE_3_length_7874_cov_92.774785	6338	5544	806	66.253	9.59e-55	CGCTGCCTGCCAAGCGGCGGCGCAGGGCTGCAGGGCAGGACCTGTACCGGGCCTGCAAGATGGGGGCGGACTGCATCCCTGATGTGAGGGCAAAATATGAGCAGGACACTGTGGCTGACCGCATTCTAAAATGGCTCAGCTCCTTTCTTTACCTTGGGAACCTGGGTATTGGCACTGGAAGAGGTGGGACGGGAGGAAGGCTGGGGTACCAGCCTGTGGGGCGCGGGGTTGC---TCAGGGGGGCGGCAGTGTCCGCGTGGGCACCCCCGTGTCTGTGCTGGAGCCCGGTGTAGGAGTGGAGACGGTGGGACCAAAGGACCTGGTGCCAGTGGACGCCTTGGGGCCCACCACTCCGTCTGTGGTGCCCCTGGGTGAGGGTGATGCCCTGGCG------C…
Equus_caballus_papillomavirus_1_strain_150904_complete_genome_MF288893.1	7613	5318	5991	NODE_3_length_7874_cov_92.774785	4746	4085	689	64.151	5.28e-20	CTATCATGGTAACAGCGAGCGTATGCTCATGGTGGGCCACCCCTTCTTTGCCCTCAAAAATGACAGGGAC--AAGC-TGGACGTTCCCAAGGTGTCCTCTAATCAGTACAGGGTGTTTGAG-GTAGTTCTCCCAAATCCCAACAAATTTGCTCTTGCAGATCAGAACATTTACAACCCAGAGACCTCCAGACTTGTCTGGGCTCTCCGCGGTGTCGAGGTGTCACGGGGGCAGCCTCT-GGGCATCGGGGTGACAGGAAGCACAGTGTTTAACAAGCTGTATGATGTAGAAAACCCAG----GGAAACGACAGGAAGCTGCAGGGGAGCGCGAGGATAAGCGTGTTAATATGGGCTTCGATGTGAAGCAGTCTCAGCTTTTGATGGTGGGCTGCAAGCC…
Equus_caballus_papillomavirus_type_1_complete_genome_AF498323.1	7610	5315	5988	NODE_3_length_7874_cov_92.774785	4746	4085	689	64.006	2.25e-18	CTATCATGGTAACAGCGAGCGTATGCTCATGGTGGGCCACCCCTTCTTTGCCCTCAAAAATGACAGGGAC--AAGC-TGGACGTTCCCAAGGTGTCCTCTAATCAGTACAGGGTGTTTGAG-GTAGTTCTCCCAAATCCCAACAAATTTGCTCTTGCAGATCAGAACATTTACAACCCAGAGACCTCCAGACTTGTCTGGGCTCTCCGCGGTGTCGAGGTGTCACGGGGGCAGCCTCT-GGGCATCGGGGTGACAGGAAGCACAGTGTTTAACAAGCTGTATGATGTAGAAAACCCAG----GGAAACGACAGGAAGCTGCAGGGGAGCGCGAGGATAAGCGTGTTAATATGGGCTTCGATGTGAAGCAGTCTCAGCTTTTGATGGTGGGCTGCAAGCC…
Equus_caballus_papillomavirus_type_1_complete_genome_NC_003748.1	7610	5315	5988	NODE_3_length_7874_cov_92.774785	4746	4085	689	64.006	2.25e-18	CTATCATGGTAACAGCGAGCGTATGCTCATGGTGGGCCACCCCTTCTTTGCCCTCAAAAATGACAGGGAC--AAGC-TGGACGTTCCCAAGGTGTCCTCTAATCAGTACAGGGTGTTTGAG-GTAGTTCTCCCAAATCCCAACAAATTTGCTCTTGCAGATCAGAACATTTACAACCCAGAGACCTCCAGACTTGTCTGGGCTCTCCGCGGTGTCGAGGTGTCACGGGGGCAGCCTCT-GGGCATCGGGGTGACAGGAAGCACAGTGTTTAACAAGCTGTATGATGTAGAAAACCCAG----GGAAACGACAGGAAGCTGCAGGGGAGCGCGAGGATAAGCGTGTTAATATGGGCTTCGATGTGAAGCAGTCTCAGCTTTTGATGGTGGGCTGCAAGCC…
Equus_caballus_papillomavirus_1_strain_150904_complete_genome_MF288893.1	7613	1629	2287	NODE_3_length_7874_cov_92.774785	809	148	676	67.308	2.92e-42	CACCAGTGTGAGGAGGCGATGAAATTTGAGTTTTCAGACATGGTGCAGTGGGCCTATGACAACCACG-TCACAGAGGAAAGTCAGATAGCATATGGGTACGCTAGCCTAGCGGACACTAATGCCAATGCTGCAGCATTTCT-GGCCTGCGCGTCTCAAGCTAAGTATGTGCGAGATGTGGCCACGATGGTCAAATATTACCGCAGAGCGGAGATGCAGAACATGTCAATATCTGAATGGATTCACAGGCAGGCAGAGAGAATAGAGGGGGAGGGCGATTGGCGGCCCATCATAAACTTTCTGAAGCACCAGGGTGTTGAAATCTCGGTGTTCATTAACAAC---CTGAAGCAGTTTGTTAAGGGGGTCCCCAAAAAAAATTGCATGGTGCTCGTGGGGC…
Equus_caballus_papillomavirus_type_1_complete_genome_AF498323.1	7610	1629	2287	NODE_3_length_7874_cov_92.774785	809	148	676	67.16	3.56e-41	CACCAGTGTGAGGAGGCGATGAAATTTGAGTTTTCAGACATGGTGCAGTGGGCCTATGACAACCACG-TCACAGAGGAAAGTCAGATAGCATATGGGTACGCTAGCCTAGCGGACACTAATGCCAATGCTGCAGCATTTCT-GGCCTGCGCGTCTCAAGCTAAGTATGTGCGAGATGTGGCCACGATGGTCAAATATTACCGCAGAGCGGAGATGCAGAACATGTCAATATCTGAATGGATTCACAGGCAGGCAGAGAGAATAGAGGGGGAGGGCGATTGGCGGCCCATCATAAACTTTCTGAAGCACCAGGGTGTTGAAATCTCGGTGTTCATTAACAAC---CTGAAGCAGTTTGTTAAGGGGGTCCCCAAAAAAAATTGCATGGTGCTCGTGGGGC…
Equus_caballus_papillomavirus_type_1_complete_genome_NC_003748.1	7610	1629	2287	NODE_3_length_7874_cov_92.774785	809	148	676	67.16	3.56e-41	CACCAGTGTGAGGAGGCGATGAAATTTGAGTTTTCAGACATGGTGCAGTGGGCCTATGACAACCACG-TCACAGAGGAAAGTCAGATAGCATATGGGTACGCTAGCCTAGCGGACACTAATGCCAATGCTGCAGCATTTCT-GGCCTGCGCGTCTCAAGCTAAGTATGTGCGAGATGTGGCCACGATGGTCAAATATTACCGCAGAGCGGAGATGCAGAACATGTCAATATCTGAATGGATTCACAGGCAGGCAGAGAGAATAGAGGGGGAGGGCGATTGGCGGCCCATCATAAACTTTCTGAAGCACCAGGGTGTTGAAATCTCGGTGTTCATTAACAAC---CTGAAGCAGTTTGTTAAGGGGGTCCCCAAAAAAAATTGCATGGTGCTCGTGGGGC…
Equus_caballus_papillomavirus_1_isolate_G2_complete_genome_MN164462.1	7611	1629	2287	NODE_3_length_7874_cov_92.774785	809	148	673	67.311	2.4e-43	CACCAGTGTGAGGAGGCGATGAAATTTGAGTTTTCAGACATGGTGCAGTGGGCCTATGACAACCACG-TCACAGAGGAAAGTCAGATAGCATATGGGTACGCTAGCCTAGCGGACACTAATGCCAATGCTGCAGCATTTCT-GGCCTGCGCGTCTCAAGCTAAGTATGTGCGAGATGTGGCCACGATGGTCAAATATTACCGCAGAGCGGAGATGCAGAACATGTCAATATCTGAATGGATTCACAGGCAGGCAGAGAGAATAGAGGGGGAGGGCGATTGGCGGCCCATCATAAACTTTCTGAAGCACCAGGGTGTTGAAATCTCGGTGTTCATTAACAACCTGAAGCAGTTTGTTAAGGGGGTCCCCAAAAAAAATTGCATGGTGCTCGTGGGGCCAC…
Equus_caballus_papillomavirus_8_strain_NCSU_complete_genome_KU963288.1	8155	1740	2359	NODE_3_length_7874_cov_92.774785	773	154	630	64.444	7.87e-12	GACATGGTGCAGTGGGCCTATGACAACCACGTCACAGAGGAAAGTCAG-ATAGCATATGGGTACGCTAGCCTAGCGGACACTAATGCCAATGCTGCAGCATTTCTGGCCTGCGCGTCTCAAGCTAAGTATGTGCGAGA-TGTGGCCACGATGGTCAAATATTACCGCAGAGCGGAGATGCAGAACATGTCAATATCTGAATGGATTCACAGGCAGGCAGAGAGA-ATAGAGGGGGAGGGCGATTGGCGGCCCATCATAAACTTTCTGAAGCACCAGGGTGTTGAA---ATCTCGGTGTTCATTAACAACCTGAAGCAGTTTGTTAAGGGGGTCCCCAAAAAAAATTGCATGGTGCTCGTGGGGCCACCAAACACTGGCAAGTCCAGCTT-TGCTGTGAG…
Equus_caballus_papillomavirus_8_strain_NCSU_complete_genome_NC_031756.1	8155	1740	2359	NODE_3_length_7874_cov_92.774785	773	154	630	64.444	7.87e-12	GACATGGTGCAGTGGGCCTATGACAACCACGTCACAGAGGAAAGTCAG-ATAGCATATGGGTACGCTAGCCTAGCGGACACTAATGCCAATGCTGCAGCATTTCTGGCCTGCGCGTCTCAAGCTAAGTATGTGCGAGA-TGTGGCCACGATGGTCAAATATTACCGCAGAGCGGAGATGCAGAACATGTCAATATCTGAATGGATTCACAGGCAGGCAGAGAGA-ATAGAGGGGGAGGGCGATTGGCGGCCCATCATAAACTTTCTGAAGCACCAGGGTGTTGAA---ATCTCGGTGTTCATTAACAACCTGAAGCAGTTTGTTAAGGGGGTCCCCAAAAAAAATTGCATGGTGCTCGTGGGGCCACCAAACACTGGCAAGTCCAGCTT-TGCTGTGAG…
Equus_ferus_caballus_papillomavirus_type_4_complete_genome_NC_020085.1	7554	1659	2257	NODE_3_length_7874_cov_92.774785	767	166	608	64.803	5.24e-20	GTGCAGTGGGCCTATGACAACCACGTCACAGAGGAAAGTCAGATAGCATATGGGTACGCTAGCCTAGCGGACACTAATGCCAATGCTGCAGCATTTCTGGCCTGCGCGTCTCAAGCTAAGTATGTGCGAGATGTGGCCACGATGGTCAAATATTACCGCAGAGCGGAGATGCAGAACATGTCAATATCTGAATGGATTCACAGGCAGGCAGAG-AGAATAGAGGGGGAGGGCGATTGGCGGCCCATCATAAACTTTCTGAAGCACCAGGGTGTTGAAATC-TCGGTGTTCATTAACAACCTGAAGCAGTTTGTTAAGGGGGTCCCCAAAAAAAATTGCATGGTGCTCGTGGGGCCACCAAACACTGGCAAGTC-CAGCTTTGCTGTGAGCTTGCTGGAG…
Equus_ferus_caballus_papillomavirus_type_4_complete_genome_JQ031032.1	7554	1659	2257	NODE_3_length_7874_cov_92.774785	767	166	608	64.803	5.24e-20	GTGCAGTGGGCCTATGACAACCACGTCACAGAGGAAAGTCAGATAGCATATGGGTACGCTAGCCTAGCGGACACTAATGCCAATGCTGCAGCATTTCTGGCCTGCGCGTCTCAAGCTAAGTATGTGCGAGATGTGGCCACGATGGTCAAATATTACCGCAGAGCGGAGATGCAGAACATGTCAATATCTGAATGGATTCACAGGCAGGCAGAG-AGAATAGAGGGGGAGGGCGATTGGCGGCCCATCATAAACTTTCTGAAGCACCAGGGTGTTGAAATC-TCGGTGTTCATTAACAACCTGAAGCAGTTTGTTAAGGGGGTCCCCAAAAAAAATTGCATGGTGCTCGTGGGGCCACCAAACACTGGCAAGTC-CAGCTTTGCTGTGAGCTTGCTGGAG…
Equine_papillomavirus_type_6_complete_genome_JQ965698.1	7551	5788	6308	NODE_3757_length_536_cov_0.806100	10	536	547	64.899	1.15e-15	AAGCAAAGCCAGGTTCTTATTGTGGGCTGCACACCTGCAATAGGGGAGCACTGGAAGTTGGCTAAGGCCTGTGGTGGTGTTCCTGCAG-----ACAACT----GCCCTCCTTTAGAGCTAGTAAAGACAC-AGATTGAGGATGGGGACATGGGCGAGGTGGGCTTTGGTGCAATGGATTTTAAAGCCTTGCAGGCCAGCAGGTCTGAGGTGCCCCTGGACCTGGTGGACACTACCTCCAAGTACCCTGACGACATACACATGGGCCAGGAGACATCTGGAAACAGCATGTTTTTCTTTGCTCG--CAGAGAGCAGATGTACACAAGGCATTTTATGGTTAGGGATGGGCTTTTAGAAAATGAAAAGG---TACCCAAGGAGATGTA-TGTTGCCCGTGC…
Equine_papillomavirus_type_6_complete_genome_NC_020500.1	7551	5788	6308	NODE_3757_length_536_cov_0.806100	10	536	547	64.899	1.15e-15	AAGCAAAGCCAGGTTCTTATTGTGGGCTGCACACCTGCAATAGGGGAGCACTGGAAGTTGGCTAAGGCCTGTGGTGGTGTTCCTGCAG-----ACAACT----GCCCTCCTTTAGAGCTAGTAAAGACAC-AGATTGAGGATGGGGACATGGGCGAGGTGGGCTTTGGTGCAATGGATTTTAAAGCCTTGCAGGCCAGCAGGTCTGAGGTGCCCCTGGACCTGGTGGACACTACCTCCAAGTACCCTGACGACATACACATGGGCCAGGAGACATCTGGAAACAGCATGTTTTTCTTTGCTCG--CAGAGAGCAGATGTACACAAGGCATTTTATGGTTAGGGATGGGCTTTTAGAAAATGAAAAGG---TACCCAAGGAGATGTA-TGTTGCCCGTGC…
Equus_caballus_papillomavirus_2_isolate_XJ-ks1391_complete_genome_MW410986.1	7802	6120	6652	NODE_3757_length_536_cov_0.806100	1	536	544	71.14	2.45e-62	TTTGATGTCAAGCAAAGCCAGGTTCTTATTGTGGGCTGCACACCTGCAATAGGGGAGCACTGGAAGTTGGCTAAGGCC-TG---TGGTGGTGTTCCTGCAGACAACTGCCCTCCTTTAGAGCTAGTAAAGACACAGATTGAGGATGGGGACATGGGCGAGGTGGGCTTTGGTGCAATGGATTTTAAAG-CCT-TGCAGGCCAGCAGGTCTGAGGTGCCCCTGGACCTGGTGGACACTACCTCCAAGTACCCTGACGACATACACATGGGCCAGGAGACATCTGGAAACAGCATGTTTTTCTTTGCTCGCAGAGAGCAGATGTACACAAGGCATTTTATGGTTAGGGATGGGCTTTTAGAAAATGAAAAGG-TACCCAAGGAG-ATGTATGTTGCCCGTG…
Equine_papillomavirus_2_isolate_Zurich_2009_HM461973.1_complete_genome	7803	6121	6653	NODE_3757_length_536_cov_0.806100	1	536	544	71.507	4.74e-65	TTTGATGTCAAGCAAAGCCAGGTTCTTATTGTGGGCTGCACACCTGCAATAGGGGAGCACTGGAAGTTGGCTAAGGCC-TG---TGGTGGTGTTCCTGCAGACAACTGCCCTCCTTTAGAGCTAGTAAAGACACAGATTGAGGATGGGGACATGGGCGAGGTGGGCTTTGGTGCAATGGATTTTAAAG-CCT-TGCAGGCCAGCAGGTCTGAGGTGCCCCTGGACCTGGTGGACACTACCTCCAAGTACCCTGACGACATACACATGGGCCAGGAGACATCTGGAAACAGCATGTTTTTCTTTGCTCGCAGAGAGCAGATGTACACAAGGCATTTTATGGTTAGGGATGGGCTTTTAGAAAATGAAAAGG-TACCCAAGGAG-ATGTATGTTGCCCGTG…
Equine_papillomavirus_2_complete_genome_EU503122.1	7802	6120	6652	NODE_3757_length_536_cov_0.806100	1	536	544	71.14	2.45e-62	TTTGATGTCAAGCAAAGCCAGGTTCTTATTGTGGGCTGCACACCTGCAATAGGGGAGCACTGGAAGTTGGCTAAGGCC-TG---TGGTGGTGTTCCTGCAGACAACTGCCCTCCTTTAGAGCTAGTAAAGACACAGATTGAGGATGGGGACATGGGCGAGGTGGGCTTTGGTGCAATGGATTTTAAAG-CCT-TGCAGGCCAGCAGGTCTGAGGTGCCCCTGGACCTGGTGGACACTACCTCCAAGTACCCTGACGACATACACATGGGCCAGGAGACATCTGGAAACAGCATGTTTTTCTTTGCTCGCAGAGAGCAGATGTACACAAGGCATTTTATGGTTAGGGATGGGCTTTTAGAAAATGAAAAGG-TACCCAAGGAG-ATGTATGTTGCCCGTG…
Equine_papillomavirus_2_complete_genome_NC_012123.1	7802	6120	6652	NODE_3757_length_536_cov_0.806100	1	536	544	71.14	2.45e-62	TTTGATGTCAAGCAAAGCCAGGTTCTTATTGTGGGCTGCACACCTGCAATAGGGGAGCACTGGAAGTTGGCTAAGGCC-TG---TGGTGGTGTTCCTGCAGACAACTGCCCTCCTTTAGAGCTAGTAAAGACACAGATTGAGGATGGGGACATGGGCGAGGTGGGCTTTGGTGCAATGGATTTTAAAG-CCT-TGCAGGCCAGCAGGTCTGAGGTGCCCCTGGACCTGGTGGACACTACCTCCAAGTACCCTGACGACATACACATGGGCCAGGAGACATCTGGAAACAGCATGTTTTTCTTTGCTCGCAGAGAGCAGATGTACACAAGGCATTTTATGGTTAGGGATGGGCTTTTAGAAAATGAAAAGG-TACCCAAGGAG-ATGTATGTTGCCCGTG…
Equus_caballus_papillomavirus_9_strain_complete_genome_SW_MN117918.1	7656	6595	7130	NODE_3757_length_536_cov_0.806100	1	536	536	99.627	0	TTTGATGTCAAGCAAAGCCAGGTTCTTATTGTGGGCTGCACACCTGCAATAGGGGAGCACTGGAAGTTGGCTAAGGCCTGTGGTGGTGTTCCTGCAGACAACTGCCCTCCTTTAGAGCTAGTAAAGACACAGATTGAGGATGGGGACATGGGCGAGGTGGGCTTTGGTGCAATGGATTTTAAAGCCTTGCAGGCCAGCAGGTCTGAGGTGCCCCTGGACCTGGTGGACACTACCTCCAAGTACCCTGACGACATACACATGGGCCAGGAGACATCTGGAAACAGCATGTTTTTCTTTGCTCGCAGAGAGCAGATGTACACAAGGCATTTTATGGTTAGGGATGGGCTTTTAGAAAATGAAAAGGTACCCAAGGAGATGTATGTTGCCCGTGCACAGGAT…
Equus_caballus_papillomavirus_9_strain_complete_genome_SW_MN117918.1	7656	1890	2321	NODE_6346_length_432_cov_1.047887	1	432	432	100	0	GCTATACAGAACTCACCAGAGACTTTAAGAGTAATAAGACATGTACTGGGGACTGGGTAGCACTTGTATACAGTGTGCGTGAGGCGCACTATGAAAGTGCCAAGGAGCTGCTACAGCAGCATTGCGACTATCTGCAGACCACCTACAGACCCCACCCGCGAGGGGCCATCTGCTTAATGCTATTGTGCTTTAAACATCACAAGAACAGAGATACAGTGGCCCGCCTGTTGCAGAGTATGCTTAATGTGAATTGTTTACACATCATGCTGCAGCCGCCGCGCACCAGGAGCGTGCCTGTGGCGCTGTTCTTTTATAAAACTGGGCTGGGAAACACGACCACCGTGTTTGGCAAGCCCCCGGAATGGATGGCGAGGCAAACACTGCTGCAGCACCAAACAG…
Equus_ferus_caballus_papillomavirus_type_7_complete_genome_JX035935.1	7619	5964	6328	NODE_3757_length_536_cov_0.806100	160	533	379	69.921	7.84e-37	GGCTTTGGTGCAATGGATTTTAAAGCCTTGCAGGCCAGCAGGTCTGAGGTGCCCCTGGACCTGGTGGACACTACCTCCAAGTACCCTGACGACATACACATGGGCCAGGAGACATCTGGAAACAGCATGTTTTTCTTTGCTCGCAGAGAGCAGATGTACACAAGGCATTTTATGGTTAGGGATGGGCTTTTAGAAAATGAAAAGGTACCCAAGGAGATGTATGTTGCCCGTGCACAGGAT----GATGACAAGAAAT-CCCACAGGTATCAGTACACACACACACCCAGTGGGTCTCTGGTGTCCACTGATTCTCAGATTTTTAACAGGCCCTACTGGCTGCAGCGCGCACAGGGCCTAAATAATGGCGTCTGCTGGCA
Equus_ferus_caballus_papillomavirus_type_7_complete_genome_NC_020501.1	7619	5964	6328	NODE_3757_length_536_cov_0.806100	160	533	379	69.921	7.84e-37	GGCTTTGGTGCAATGGATTTTAAAGCCTTGCAGGCCAGCAGGTCTGAGGTGCCCCTGGACCTGGTGGACACTACCTCCAAGTACCCTGACGACATACACATGGGCCAGGAGACATCTGGAAACAGCATGTTTTTCTTTGCTCGCAGAGAGCAGATGTACACAAGGCATTTTATGGTTAGGGATGGGCTTTTAGAAAATGAAAAGGTACCCAAGGAGATGTATGTTGCCCGTGCACAGGAT----GATGACAAGAAAT-CCCACAGGTATCAGTACACACACACACCCAGTGGGTCTCTGGTGTCCACTGATTCTCAGATTTTTAACAGGCCCTACTGGCTGCAGCGCGCACAGGGCCTAAATAATGGCGTCTGCTGGCA
Equine_papillomavirus_type_6_complete_genome_JQ965698.1	7551	5512	5849	NODE_3_length_7874_cov_92.774785	4670	4330	342	63.743	0.004	GACGTTCCCAAGGTGTCCTCTAATCAGTACAGGGTGTTTGAGGTAGTTCTCCCAAATCCCAACAAATTTGCTCTTGCAGATCAGAACATTTACAACCCAGAGACCTCCAGACTTGTCTGGGCTCTCCGCGGTGTCGAGGTGTCACGGGGGCAGCCTCTGGGCATCGGGGTGACAGGAAGCACAGTGTTTAACAAGCTGTATGATGTAGAAAACCCAGGGAAACGACAGGAAGCTGCAGGGGAGCGCGAGGATAAGCGTGTTAATATGG-GCTTCGATGTGAAGCAGTCTCAGCTTTTGATGGTGGGCTGCAAGCCGGCCATCGGCGAGCACTGGACCAAGGC
Equine_papillomavirus_type_6_complete_genome_NC_020500.1	7551	5512	5849	NODE_3_length_7874_cov_92.774785	4670	4330	342	63.743	0.004	GACGTTCCCAAGGTGTCCTCTAATCAGTACAGGGTGTTTGAGGTAGTTCTCCCAAATCCCAACAAATTTGCTCTTGCAGATCAGAACATTTACAACCCAGAGACCTCCAGACTTGTCTGGGCTCTCCGCGGTGTCGAGGTGTCACGGGGGCAGCCTCTGGGCATCGGGGTGACAGGAAGCACAGTGTTTAACAAGCTGTATGATGTAGAAAACCCAGGGAAACGACAGGAAGCTGCAGGGGAGCGCGAGGATAAGCGTGTTAATATGG-GCTTCGATGTGAAGCAGTCTCAGCTTTTGATGGTGGGCTGCAAGCCGGCCATCGGCGAGCACTGGACCAAGGC
Equus_ferus_caballus_papillomavirus_type_5_complete_genome_JQ031033.1	7519	2121	2449	NODE_3_length_7874_cov_92.774785	329	1	334	67.066	9.44e-17	CATTTCTGGCTAATGCCTCTTGCAGACACCAGAATGGCGCTGCTGGACGATGCCACAGGGCCTGTGTGGGATTTCTTTGACCATTACATGCGCAATGCCATGGATGGCAACCCCATTTCTGTGGACCAGAAGCATA-AGCAGCCTCTGCAGCTAAGATGCCCCCCTCTGTTGATGACCACAAACGTGGACAT---CAGCCAGGAGTCGAAGTATTGGTACCTGCACAGTCGCATGAT-TGTGCTTAGATTCCCCAACCCCTTCCCTCTTGATGAAAACCAGCAGCCCGTATTTGAATTAACTGTGAAAAATTGGAAATCTCTTTTTAAAAGGTT
Equus_ferus_caballus_papillomavirus_type_5_complete_genome_NC_020084.1	7519	2121	2449	NODE_3_length_7874_cov_92.774785	329	1	334	67.066	9.44e-17	CATTTCTGGCTAATGCCTCTTGCAGACACCAGAATGGCGCTGCTGGACGATGCCACAGGGCCTGTGTGGGATTTCTTTGACCATTACATGCGCAATGCCATGGATGGCAACCCCATTTCTGTGGACCAGAAGCATA-AGCAGCCTCTGCAGCTAAGATGCCCCCCTCTGTTGATGACCACAAACGTGGACAT---CAGCCAGGAGTCGAAGTATTGGTACCTGCACAGTCGCATGAT-TGTGCTTAGATTCCCCAACCCCTTCCCTCTTGATGAAAACCAGCAGCCCGTATTTGAATTAACTGTGAAAAATTGGAAATCTCTTTTTAAAAGGTT
Equus_ferus_caballus_papillomavirus_type_4_complete_genome_NC_020085.1	7554	5867	6164	NODE_3757_length_536_cov_0.806100	1	298	300	68.333	4.3e-21	TTTGATGTCAAGCAAAGCCAGGTTCTTATTGTGGGCTGCACACCTGCAATAGGGGAGCACTGGAAGTTGGCTAAGGCCTGTGGTGGTGTTCCTGCAGACAACT--GCCCTCCTTTAGAGCTAGTAAAGACACAGATTGAGGATGGGGACATGGGCGAGGTGGGCTTTGGTGCAATGGATTTTAAAGCCTTGCAGGCCAGCAGGTCTGAGGTGCCCCTGGACCTGGTGGACACTACCTCCAAGTACCCTGACGACATACACATGGGCCAGGAGACATCTGGAAACAGCATGTTTTTCTTTG
Equus_ferus_caballus_papillomavirus_type_4_complete_genome_JQ031032.1	7554	5867	6164	NODE_3757_length_536_cov_0.806100	1	298	300	68.333	4.3e-21	TTTGATGTCAAGCAAAGCCAGGTTCTTATTGTGGGCTGCACACCTGCAATAGGGGAGCACTGGAAGTTGGCTAAGGCCTGTGGTGGTGTTCCTGCAGACAACT--GCCCTCCTTTAGAGCTAGTAAAGACACAGATTGAGGATGGGGACATGGGCGAGGTGGGCTTTGGTGCAATGGATTTTAAAGCCTTGCAGGCCAGCAGGTCTGAGGTGCCCCTGGACCTGGTGGACACTACCTCCAAGTACCCTGACGACATACACATGGGCCAGGAGACATCTGGAAACAGCATGTTTTTCTTTG
Equus_caballus_papillomavirus_1_isolate_G2_complete_genome_MN164462.1	7611	5315	5608	NODE_3_length_7874_cov_92.774785	4746	4456	296	66.216	1.33e-08	CTATCATGGTAACAGCGAGCGTATGCTCATGGTGGGCCACCCCTTCTTTGCCCTCAAAAATGACAGGGA-CAAGC--TGGACGTTCCCAAGGTGTCCTCTAATCAGTACAGGGTGTTTGAG-GTAGTTCTCCCAAATCCCAACAAATTTGCTCTTGCAGATCAGAACATTTACAACCCAGAGACCTCCAGACTTGTCTGGGCTCTCCGCGGTGTCGAGGTGTCACGGGGGCAGCCTCT-GGGCATCGGGGTGACAGGAAGCACAGTGTTTAACAAGCTGTATGATGTAGAAAACCC
Equus_ferus_caballus_papillomavirus_type_4_complete_genome_NC_020085.1	7554	4003	4239	NODE_3_length_7874_cov_92.774785	6315	6073	247	64.372	0.004	AGGGCTGCAGGGCAGGACCTGTACCGGGCCTGCAAGATGGGGGCGGACTGCATCCCTGATGTGAGGGCAAAATATGAGCAGGACACTGTGGCTGACCGCATTCTAAAATGGCTCAGCTCCTTTCTTTACCTTGGGAACCTGGGTATTGGC---ACTGGAAGAGGTGGGACGGGAGGAAGGCTGGGGTACCAGCCTGTGGGGCGCGGG-GTTGCTCAGGGGGGCGGCAGTGTCCGCGTGGGCACCCCC
Equus_ferus_caballus_papillomavirus_type_4_complete_genome_JQ031032.1	7554	4003	4239	NODE_3_length_7874_cov_92.774785	6315	6073	247	64.372	0.004	AGGGCTGCAGGGCAGGACCTGTACCGGGCCTGCAAGATGGGGGCGGACTGCATCCCTGATGTGAGGGCAAAATATGAGCAGGACACTGTGGCTGACCGCATTCTAAAATGGCTCAGCTCCTTTCTTTACCTTGGGAACCTGGGTATTGGC---ACTGGAAGAGGTGGGACGGGAGGAAGGCTGGGGTACCAGCCTGTGGGGCGCGGG-GTTGCTCAGGGGGGCGGCAGTGTCCGCGTGGGCACCCCC
Equus_caballus_papillomavirus_9_strain_complete_genome_SW_MN117918.1	7656	3823	4064	NODE_30328_length_242_cov_0.751515	242	1	242	100	1.62e-121	CACATCTCGGGAGGAGACGTTTGGCCTCATCTGACTGCAGCCCTCAGCAATCCAAGAGGTACTGCTCTTCGCAGCACAGAGGAGGCACACCTGGGCTGCCACCCTGTGAGCACGACCCACCCACACCCGTCTCTGGAAGCCAAGGGGTCCCTAGCCCCTCCCCTTCCACCCCCTGTGTGCAGAGCCCGGGTTCGACTGCTGCTGCATCGATACCGTCGCTCGGGAGTCCGTTGGAACCATCG
Equus_caballus_papillomavirus_9_strain_complete_genome_SW_MN117918.1	7656	1333	1525	NODE_3_length_7874_cov_92.774785	1770	1578	197	69.036	9e-11	GGACAATGACCCAGGTACTAGCCCAAGGGAGGGGACTAGTGGCGCAGCCTGTTTTCTGGATAGGGAGGCGCTGTGTAGCGACTGTGATAGTG---ATGACTTAGAG-GATTCCTCAGAAGGGATCGATGGGGAAGACTTTGTCGACAATGCATTTGTCGGCCAGGGAAATTCCCTAGCACTGTTCCAGCAGCAGCAG
Equus_caballus_papillomavirus_9_strain_complete_genome_SW_MN117918.1	7656	3011	3203	NODE_3_length_7874_cov_92.774785	7874	7682	195	70.769	1.17e-15	CCCTTCCCTCTTGATGAAAACCAGCAGCCCGTATTTGAATTAACTGTGAAAAATTGGAAATCTCTTTTTAAAAGGTTGTGGCAGCGCTTAGAATTGAGTGACCAGGAGGACGAGGGAGACGATGGAGAACCTACACAGGGCTTTAGATGCACTGGCCGA-AAGA-CAAATGACTTTGTATGAGCGGGGGAGCACA
Equus_ferus_caballus_papillomavirus_type_5_complete_genome_JQ031033.1	7519	2383	2576	NODE_3_length_7874_cov_92.774785	7864	7677	194	73.196	6.79e-25	TTGATGAAAACCAGCAGCCCGTATTTGAATTAACTGTGAAAAATTGGAAATCTCTTTTTAAAAGGTTGTGGCAGCGCTTAGAATTGAGTGACCAGGAGGACGAGG------GAGACGATGGAGAACCTACACAGGGCTTTAGATGCACTGGCCGAAAGACAAATGACTTTGTATGAGCGGGGGAGCACAAATCT
Equus_ferus_caballus_papillomavirus_type_5_complete_genome_NC_020084.1	7519	2383	2576	NODE_3_length_7874_cov_92.774785	7864	7677	194	73.196	6.79e-25	TTGATGAAAACCAGCAGCCCGTATTTGAATTAACTGTGAAAAATTGGAAATCTCTTTTTAAAAGGTTGTGGCAGCGCTTAGAATTGAGTGACCAGGAGGACGAGG------GAGACGATGGAGAACCTACACAGGGCTTTAGATGCACTGGCCGAAAGACAAATGACTTTGTATGAGCGGGGGAGCACAAATCT
Equus_caballus_papillomavirus_1_isolate_G2_complete_genome_MN164462.1	7611	5799	5988	NODE_3_length_7874_cov_92.774785	4274	4085	193	69.948	2.1e-12	CACACCCCCATTGAGGACGGGGACATGGGCGACATAGGTTTTGGTTGTCTTGACTTTAAGTACCTCTGCGAGA--ACAAGTCAGACATTCCACTGGACATTGTAGATGCCACCTGCAAGTACCCGGACTACATT-AAGATGGGTCAGGAGGCCTCTGGCAACTGCATGTTCTTCTATGCTAGGCGGGAGCAGA
Equus_ferus_caballus_papillomavirus_type_4_complete_genome_NC_020085.1	7554	2356	2540	NODE_3_length_7874_cov_92.774785	7864	7683	188	72.872	4.3e-21	TTGATGAAAACCAGCAGCCCGTATTTGAATTAACTGTGAAAAATTGGAAATCTCTTTTTAAAAGGTTGTGGCAGCGCTTAGAATTGAGTGACCAGGAGGACG---AGGGA---GACGATGGAGAACCTACACAGGGCTTTAGATGCACTGGCCGAAAGACAAATGACTTTGTATGAGCGGGGGAGCAC
Equus_ferus_caballus_papillomavirus_type_4_complete_genome_JQ031032.1	7554	2356	2540	NODE_3_length_7874_cov_92.774785	7864	7683	188	72.872	4.3e-21	TTGATGAAAACCAGCAGCCCGTATTTGAATTAACTGTGAAAAATTGGAAATCTCTTTTTAAAAGGTTGTGGCAGCGCTTAGAATTGAGTGACCAGGAGGACG---AGGGA---GACGATGGAGAACCTACACAGGGCTTTAGATGCACTGGCCGAAAGACAAATGACTTTGTATGAGCGGGGGAGCAC
Equus_caballus_papillomavirus_1_strain_150904_complete_genome_MF288893.1	7613	2407	2555	NODE_3_length_7874_cov_92.774785	7825	7677	150	73.333	4.06e-15	AAAATTGGAAATCTCTTTTTAAAAGGTTGTGGCAGCGC-TTAGAATTGAGTGACCAGGAGGACGAGGGAGACGATGGAGAACCTACACAGGGCTTTAGATGCACTGGCCGAAAGACAAATGACTTTGTATGAGCGGGGGAGCACAAATCT
Equus_caballus_papillomavirus_1_isolate_G2_complete_genome_MN164462.1	7611	2407	2555	NODE_3_length_7874_cov_92.774785	7825	7677	150	73.333	4.06e-15	AAAATTGGAAATCTCTTTTTAAAAGGTTGTGGCAGCGC-TTAGAATTGAGTGACCAGGAGGACGAGGGAGACGATGGAGAACCTACACAGGGCTTTAGATGCACTGGCCGAAAGACAAATGACTTTGTATGAGCGGGGGAGCACAAATCT
Equus_caballus_papillomavirus_type_1_complete_genome_AF498323.1	7610	2407	2555	NODE_3_length_7874_cov_92.774785	7825	7677	150	73.333	4.06e-15	AAAATTGGAAATCTCTTTTTAAAAGGTTGTGGCAGCGC-TTAGAATTGAGTGACCAGGAGGACGAGGGAGACGATGGAGAACCTACACAGGGCTTTAGATGCACTGGCCGAAAGACAAATGACTTTGTATGAGCGGGGGAGCACAAATCT
Equus_caballus_papillomavirus_type_1_complete_genome_NC_003748.1	7610	2407	2555	NODE_3_length_7874_cov_92.774785	7825	7677	150	73.333	4.06e-15	AAAATTGGAAATCTCTTTTTAAAAGGTTGTGGCAGCGC-TTAGAATTGAGTGACCAGGAGGACGAGGGAGACGATGGAGAACCTACACAGGGCTTTAGATGCACTGGCCGAAAGACAAATGACTTTGTATGAGCGGGGGAGCACAAATCT
Equus_ferus_caballus_papillomavirus_type_7_complete_genome_JX035935.1	7619	2012	2160	NODE_3_length_7874_cov_92.774785	469	321	149	67.114	0.000293	TGAAGCAGTTTGTTAAGGGGGTCCCCAAAAAAAATTGCATGGTGCTCGTGGGGCCACCAAACACTGGCAAGTCCAGCTTTGCTGTGAGCTTGCTGGAGTTTATGAACGGGAAGGTCCTCTTCTTCCCAAACAGCAAGAGCCATTTCTGG
Equus_ferus_caballus_papillomavirus_type_7_complete_genome_NC_020501.1	7619	2012	2160	NODE_3_length_7874_cov_92.774785	469	321	149	67.114	0.000293	TGAAGCAGTTTGTTAAGGGGGTCCCCAAAAAAAATTGCATGGTGCTCGTGGGGCCACCAAACACTGGCAAGTCCAGCTTTGCTGTGAGCTTGCTGGAGTTTATGAACGGGAAGGTCCTCTTCTTCCCAAACAGCAAGAGCCATTTCTGG
Equine_papillomavirus_type_6_complete_genome_JQ965698.1	7551	6207	6347	NODE_3_length_7874_cov_92.774785	3969	3829	141	71.631	2.09e-12	CACGCCAAGTGGATCGCTGGTGTCCACCGACTCTCAAATCTTTAACAGGCCTTACTGGCTGCAGCGTGCACAGGGGCAAAACAATGGGGTCTGCTGGCATGACAAGGTGTATGTTACAGTTTTTGACAACACCCGGGGTAC
Equine_papillomavirus_type_6_complete_genome_NC_020500.1	7551	6207	6347	NODE_3_length_7874_cov_92.774785	3969	3829	141	71.631	2.09e-12	CACGCCAAGTGGATCGCTGGTGTCCACCGACTCTCAAATCTTTAACAGGCCTTACTGGCTGCAGCGTGCACAGGGGCAAAACAATGGGGTCTGCTGGCATGACAAGGTGTATGTTACAGTTTTTGACAACACCCGGGGTAC
Equine_papillomavirus_3_isolate_Haflinger_GU384895.1_complete_genome	7582	6214	6338	NODE_3_length_7874_cov_92.774785	3932	3808	125	77.6	5.26e-20	ATCTTTAACAGGCCTTACTGGCTGCAGCGTGCACAGGGGCAAAACAATGGGGTCTGCTGGCATGACAAGGTGTATGTTACAGTTTTTGACAACACCCGGGGTACCAATTTCAGCATCAGTGTCAA
Equine_papillomavirus_3_complete_genome_NC_017862.1	7582	6214	6338	NODE_3_length_7874_cov_92.774785	3932	3808	125	77.6	5.26e-20	ATCTTTAACAGGCCTTACTGGCTGCAGCGTGCACAGGGGCAAAACAATGGGGTCTGCTGGCATGACAAGGTGTATGTTACAGTTTTTGACAACACCCGGGGTACCAATTTCAGCATCAGTGTCAA
Equine_papillomavirus_3_isolate_Haflinger_GU384895.1_complete_genome	7582	6385	6507	NODE_3_length_7874_cov_92.774785	3749	3627	123	66.667	0.53	AGACATGTGGAGGAGTATGAATTGTCCTTCATCTTTGAGCTGTGCAGTGTCACGTTGTCTCCAGAGGTAATGGCGCACCTGCACACCATGGACCCAGACATTCTTGAGGAATGGGAAATAGGC
Equine_papillomavirus_3_complete_genome_NC_017862.1	7582	6385	6507	NODE_3_length_7874_cov_92.774785	3749	3627	123	66.667	0.53	AGACATGTGGAGGAGTATGAATTGTCCTTCATCTTTGAGCTGTGCAGTGTCACGTTGTCTCCAGAGGTAATGGCGCACCTGCACACCATGGACCCAGACATTCTTGAGGAATGGGAAATAGGC
Equus_ferus_caballus_papillomavirus_type_7_complete_genome_JX035935.1	7619	6000	6121	NODE_3_length_7874_cov_92.774785	4202	4081	122	70.492	1.62e-07	AACAAGTCAGACATTCCACTGGACATTGTAGATGCCACCTGCAAGTACCCGGACTACATTAAGATGGGTCAGGAGGCCTCTGGCAACTGCATGTTCTTCTATGCTAGGCGGGAGCAGATGTA
Equus_ferus_caballus_papillomavirus_type_7_complete_genome_JX035935.1	7619	6442	6562	NODE_3_length_7874_cov_92.774785	3748	3628	122	70.492	2.4e-05	GACATGTGGAGGAGTATGAATTGTCCTTCATCTTTGAGCTGTGCAGTGTCACGTTGTCTCCAGAGGTAATGGCGCACCTGCACACCATGGACCCAGACA-TTCTTGAGGAATGGGAAATAGG
Equus_ferus_caballus_papillomavirus_type_7_complete_genome_NC_020501.1	7619	6000	6121	NODE_3_length_7874_cov_92.774785	4202	4081	122	70.492	1.62e-07	AACAAGTCAGACATTCCACTGGACATTGTAGATGCCACCTGCAAGTACCCGGACTACATTAAGATGGGTCAGGAGGCCTCTGGCAACTGCATGTTCTTCTATGCTAGGCGGGAGCAGATGTA
Equus_ferus_caballus_papillomavirus_type_7_complete_genome_NC_020501.1	7619	6442	6562	NODE_3_length_7874_cov_92.774785	3748	3628	122	70.492	2.4e-05	GACATGTGGAGGAGTATGAATTGTCCTTCATCTTTGAGCTGTGCAGTGTCACGTTGTCTCCAGAGGTAATGGCGCACCTGCACACCATGGACCCAGACA-TTCTTGAGGAATGGGAAATAGG
Equus_caballus_papillomavirus_8_strain_NCSU_complete_genome_KU963288.1	8155	1344	1456	NODE_6346_length_432_cov_1.047887	24	136	116	69.828	0.16	TTTAAGAGTAATAAGACATGTACTGGGGACTGGGTA--GCACTTGTATACAGTGTGCGTGAGGCGCACTATGAAAGTGCCAAGGAGCTGCT-ACAGCAGCATTGCGACTATCTGCA
Equus_caballus_papillomavirus_8_strain_NCSU_complete_genome_NC_031756.1	8155	1344	1456	NODE_6346_length_432_cov_1.047887	24	136	116	69.828	0.16	TTTAAGAGTAATAAGACATGTACTGGGGACTGGGTA--GCACTTGTATACAGTGTGCGTGAGGCGCACTATGAAAGTGCCAAGGAGCTGCT-ACAGCAGCATTGCGACTATCTGCA
Equus_caballus_papillomavirus_1_strain_150904_complete_genome_MF288893.1	7613	6144	6258	NODE_3_length_7874_cov_92.774785	3935	3821	115	68.696	0.001	CAAATCTTTAACAGGCCTTACTGGCTGCAGCGTGCACAGGGGCAAAACAATGGGGTCTGCTGGCATGACAAGGTGTATGTTACAGTTTTTGACAACACCCGGGGTACCAATTTCA
Equus_caballus_papillomavirus_1_isolate_G2_complete_genome_MN164462.1	7611	6141	6255	NODE_3_length_7874_cov_92.774785	3935	3821	115	67.826	0.043	CAAATCTTTAACAGGCCTTACTGGCTGCAGCGTGCACAGGGGCAAAACAATGGGGTCTGCTGGCATGACAAGGTGTATGTTACAGTTTTTGACAACACCCGGGGTACCAATTTCA
Equus_caballus_papillomavirus_type_1_complete_genome_AF498323.1	7610	6141	6255	NODE_3_length_7874_cov_92.774785	3935	3821	115	68.696	0.001	CAAATCTTTAACAGGCCTTACTGGCTGCAGCGTGCACAGGGGCAAAACAATGGGGTCTGCTGGCATGACAAGGTGTATGTTACAGTTTTTGACAACACCCGGGGTACCAATTTCA
Equus_caballus_papillomavirus_type_1_complete_genome_NC_003748.1	7610	6141	6255	NODE_3_length_7874_cov_92.774785	3935	3821	115	68.696	0.001	CAAATCTTTAACAGGCCTTACTGGCTGCAGCGTGCACAGGGGCAAAACAATGGGGTCTGCTGGCATGACAAGGTGTATGTTACAGTTTTTGACAACACCCGGGGTACCAATTTCA
Equus_ferus_caballus_papillomavirus_type_7_complete_genome_JX035935.1	7619	6279	6391	NODE_3_length_7874_cov_92.774785	3920	3808	113	77.876	2.74e-17	CCTTACTGGCTGCAGCGTGCACAGGGGCAAAACAATGGGGTCTGCTGGCATGACAAGGTGTATGTTACAGTTTTTGACAACACCCGGGGTACCAATTTCAGCATCAGTGTCAA
Equus_ferus_caballus_papillomavirus_type_7_complete_genome_NC_020501.1	7619	6279	6391	NODE_3_length_7874_cov_92.774785	3920	3808	113	77.876	2.74e-17	CCTTACTGGCTGCAGCGTGCACAGGGGCAAAACAATGGGGTCTGCTGGCATGACAAGGTGTATGTTACAGTTTTTGACAACACCCGGGGTACCAATTTCAGCATCAGTGTCAA
Equine_papillomavirus_type_6_complete_genome_JQ965698.1	7551	2459	2565	NODE_3_length_7874_cov_92.774785	7821	7721	107	72.897	3.77e-09	TTGGAAATCTCTTTTTAAAAGGTTGTGGCAGCGCTTAGAATTGAGTGACCAGGAGGACGAGGG------AGACGATGGAGAACCTACACAGGGCTTTAGATGCACTG
Equine_papillomavirus_type_6_complete_genome_NC_020500.1	7551	2459	2565	NODE_3_length_7874_cov_92.774785	7821	7721	107	72.897	3.77e-09	TTGGAAATCTCTTTTTAAAAGGTTGTGGCAGCGCTTAGAATTGAGTGACCAGGAGGACGAGGG------AGACGATGGAGAACCTACACAGGGCTTTAGATGCACTG
Equus_caballus_papillomavirus_9_strain_complete_genome_SW_MN117918.1	7656	56	149	NODE_3_length_7874_cov_92.774785	3283	3181	106	75.472	1.1e-09	ATGTGTCATG-TCTTTC--TGCACCGCGCCCGCTGGTGGCATGCACGCACCCAATGAGTCCCTTATCCGCAGCGCTGCTGGTGCACGTATAAGAGCGCACCTGGTG
Equus_caballus_papillomavirus_8_strain_NCSU_complete_genome_KU963288.1	8155	7013	7115	NODE_3_length_7874_cov_92.774785	3931	3829	103	73.786	4.08e-09	TCTTTAACAGGCCTTACTGGCTGCAGCGTGCACAGGGGCAAAACAATGGGGTCTGCTGGCATGACAAGGTGTATGTTACAGTTTTTGACAACACCCGGGGTAC
Equus_caballus_papillomavirus_8_strain_NCSU_complete_genome_NC_031756.1	8155	7013	7115	NODE_3_length_7874_cov_92.774785	3931	3829	103	73.786	4.08e-09	TCTTTAACAGGCCTTACTGGCTGCAGCGTGCACAGGGGCAAAACAATGGGGTCTGCTGGCATGACAAGGTGTATGTTACAGTTTTTGACAACACCCGGGGTAC
Equine_papillomavirus_3_isolate_Haflinger_GU384895.1_complete_genome	7582	6178	6278	NODE_3757_length_536_cov_0.806100	436	536	101	78.218	4.05e-15	ACACCCAGTGGGTCTCTGGTGTCCACTGATTCTCAGATTTTTAACAGGCCCTACTGGCTGCAGCGCGCACAGGGCCTAAATAATGGCGTCTGCTGGCATGA
Equine_papillomavirus_3_complete_genome_NC_017862.1	7582	6178	6278	NODE_3757_length_536_cov_0.806100	436	536	101	78.218	4.05e-15	ACACCCAGTGGGTCTCTGGTGTCCACTGATTCTCAGATTTTTAACAGGCCCTACTGGCTGCAGCGCGCACAGGGCCTAAATAATGGCGTCTGCTGGCATGA
Equus_ferus_caballus_papillomavirus_type_5_complete_genome_JQ031033.1	7519	6273	6373	NODE_3757_length_536_cov_0.806100	436	536	101	79.208	3.29e-16	ACACCCAGTGGGTCTCTGGTGTCCACTGATTCTCAGATTTTTAACAGGCCCTACTGGCTGCAGCGCGCACAGGGCCTAAATAATGGCGTCTGCTGGCATGA
Equus_ferus_caballus_papillomavirus_type_5_complete_genome_NC_020084.1	7519	6273	6373	NODE_3757_length_536_cov_0.806100	436	536	101	79.208	3.29e-16	ACACCCAGTGGGTCTCTGGTGTCCACTGATTCTCAGATTTTTAACAGGCCCTACTGGCTGCAGCGCGCACAGGGCCTAAATAATGGCGTCTGCTGGCATGA
Equus_caballus_papillomavirus_8_strain_NCSU_complete_genome_KU963288.1	8155	2814	2913	NODE_3_length_7874_cov_92.774785	7496	7397	100	69	0.047	CTTTGCAGGCGAGCCCTGGAGTATGACAGATGTCAGCCGCGAAATGTACGCGGCCCCGCCTTGCGATACGTTCAAAAAGGGAGGGTACGTTGTCGAGGTG
Equus_caballus_papillomavirus_8_strain_NCSU_complete_genome_NC_031756.1	8155	2814	2913	NODE_3_length_7874_cov_92.774785	7496	7397	100	69	0.047	CTTTGCAGGCGAGCCCTGGAGTATGACAGATGTCAGCCGCGAAATGTACGCGGCCCCGCCTTGCGATACGTTCAAAAAGGGAGGGTACGTTGTCGAGGTG
Equus_caballus_papillomavirus_8_strain_NCSU_complete_genome_KU963288.1	8155	2496	2588	NODE_3_length_7874_cov_92.774785	7814	7722	94	82.979	2.93e-17	TCTCTTTTTAAAAGGTTGTGGCAGCGCTTAGAATTGAGTGACCAGGAGGACGAGGGAGACGATGGAGAACCT-ACACAGGGCTTTAGATGCACT
Equus_caballus_papillomavirus_8_strain_NCSU_complete_genome_NC_031756.1	8155	2496	2588	NODE_3_length_7874_cov_92.774785	7814	7722	94	82.979	2.93e-17	TCTCTTTTTAAAAGGTTGTGGCAGCGCTTAGAATTGAGTGACCAGGAGGACGAGGGAGACGATGGAGAACCT-ACACAGGGCTTTAGATGCACT
Equus_ferus_caballus_papillomavirus_type_4_complete_genome_NC_020085.1	7554	2791	2871	NODE_3_length_7874_cov_92.774785	7432	7352	83	71.084	0.52	GATACGTTCAAAAAGGGAGGGTACGTTGTCGAGGTGTTCTTT--AGCCAAGACAGCCACGACGCCATGTGGTATACAGGCTGG
Equus_ferus_caballus_papillomavirus_type_4_complete_genome_JQ031032.1	7554	2791	2871	NODE_3_length_7874_cov_92.774785	7432	7352	83	71.084	0.52	GATACGTTCAAAAAGGGAGGGTACGTTGTCGAGGTGTTCTTT--AGCCAAGACAGCCACGACGCCATGTGGTATACAGGCTGG
Equus_caballus_papillomavirus_8_strain_NCSU_complete_genome_KU963288.1	8155	6532	6608	NODE_3_length_7874_cov_92.774785	4409	4333	79	74.684	0.013	AATATGGGCTTCGATGTGAAGCAGTCTCAG--CTTTTGATGGTGGGCTGCAAGCCGGCCATCGGCGAGCACTGGACCAA
Equus_caballus_papillomavirus_8_strain_NCSU_complete_genome_NC_031756.1	8155	6532	6608	NODE_3_length_7874_cov_92.774785	4409	4333	79	74.684	0.013	AATATGGGCTTCGATGTGAAGCAGTCTCAG--CTTTTGATGGTGGGCTGCAAGCCGGCCATCGGCGAGCACTGGACCAA
Equus_ferus_caballus_papillomavirus_type_5_complete_genome_JQ031033.1	7519	4084	4158	NODE_3_length_7874_cov_92.774785	6235	6161	75	85.333	1.15e-15	GGACACTGTGGCTGACCGCATTCTAAAATGGCTCAGCTCCTTTCTTTACCTTGGGAACCTGGGTATTGGCACTGG
Equus_ferus_caballus_papillomavirus_type_5_complete_genome_NC_020084.1	7519	4084	4158	NODE_3_length_7874_cov_92.774785	6235	6161	75	85.333	1.15e-15	GGACACTGTGGCTGACCGCATTCTAAAATGGCTCAGCTCCTTTCTTTACCTTGGGAACCTGGGTATTGGCACTGG
Equus_ferus_caballus_papillomavirus_type_7_complete_genome_JX035935.1	7619	2457	2529	NODE_3_length_7874_cov_92.774785	7821	7748	74	79.73	1.33e-08	TTGGAAATCTCTTTTTAAAAGGTTGTGGCAGCGCTTAGAATTGAGTGACCAGGAGGACGAGGGAGACGATGGAG
Equus_ferus_caballus_papillomavirus_type_7_complete_genome_NC_020501.1	7619	2457	2529	NODE_3_length_7874_cov_92.774785	7821	7748	74	79.73	1.33e-08	TTGGAAATCTCTTTTTAAAAGGTTGTGGCAGCGCTTAGAATTGAGTGACCAGGAGGACGAGGGAGACGATGGAG
Equus_ferus_caballus_papillomavirus_type_5_complete_genome_JQ031033.1	7519	3362	3432	NODE_3_length_7874_cov_92.774785	6915	6845	72	75	0.012	GAGGCCCGGGGCTATTGGGA-ACCCCCCCTTCCCCCGCCCTTCTGCAGGGCGAGGATGCGCCGGACTCATCT
Equus_ferus_caballus_papillomavirus_type_5_complete_genome_NC_020084.1	7519	3362	3432	NODE_3_length_7874_cov_92.774785	6915	6845	72	75	0.012	GAGGCCCGGGGCTATTGGGA-ACCCCCCCTTCCCCCGCCCTTCTGCAGGGCGAGGATGCGCCGGACTCATCT
Equus_caballus_papillomavirus_8_strain_NCSU_complete_genome_KU963288.1	8155	6283	6350	NODE_3_length_7874_cov_92.774785	4667	4600	68	77.941	2.11e-06	GTTCCCAAGGTGTCCTCTAATCAGTACAGGGTGTTTGAGGTAGTTCTCCCAAATCCCAACAAATTTGC
Equus_caballus_papillomavirus_8_strain_NCSU_complete_genome_NC_031756.1	8155	6283	6350	NODE_3_length_7874_cov_92.774785	4667	4600	68	77.941	2.11e-06	GTTCCCAAGGTGTCCTCTAATCAGTACAGGGTGTTTGAGGTAGTTCTCCCAAATCCCAACAAATTTGC
Equus_ferus_caballus_papillomavirus_type_4_complete_genome_NC_020085.1	7554	2356	2422	NODE_3_length_7874_cov_92.774785	67	1	67	79.104	1.61e-07	TTGATGAAAACCAGCAGCCCGTATTTGAATTAACTGTGAAAAATTGGAAATCTCTTTTTAAAAGGTT
Equus_ferus_caballus_papillomavirus_type_4_complete_genome_JQ031032.1	7554	2356	2422	NODE_3_length_7874_cov_92.774785	67	1	67	79.104	1.61e-07	TTGATGAAAACCAGCAGCCCGTATTTGAATTAACTGTGAAAAATTGGAAATCTCTTTTTAAAAGGTT
Equus_caballus_papillomavirus_1_strain_150904_complete_genome_MF288893.1	7613	6138	6197	NODE_3757_length_536_cov_0.806100	463	522	60	81.667	1.62e-07	GATTCTCAGATTTTTAACAGGCCCTACTGGCTGCAGCGCGCACAGGGCCTAAATAATGGC
Equus_caballus_papillomavirus_1_isolate_G2_complete_genome_MN164462.1	7611	6135	6194	NODE_3757_length_536_cov_0.806100	463	522	60	80	1.97e-06	GATTCTCAGATTTTTAACAGGCCCTACTGGCTGCAGCGCGCACAGGGCCTAAATAATGGC
Equus_caballus_papillomavirus_type_1_complete_genome_AF498323.1	7610	6135	6194	NODE_3757_length_536_cov_0.806100	463	522	60	81.667	1.62e-07	GATTCTCAGATTTTTAACAGGCCCTACTGGCTGCAGCGCGCACAGGGCCTAAATAATGGC
Equus_caballus_papillomavirus_type_1_complete_genome_NC_003748.1	7610	6135	6194	NODE_3757_length_536_cov_0.806100	463	522	60	81.667	1.62e-07	GATTCTCAGATTTTTAACAGGCCCTACTGGCTGCAGCGCGCACAGGGCCTAAATAATGGC
Equus_caballus_papillomavirus_8_strain_NCSU_complete_genome_KU963288.1	8155	3820	3877	NODE_1646_length_738_cov_2.080182	393	337	59	84.746	4.97e-08	CCCCTGCCCCATCCC--GCCCGCACCCCCAGCCCCGGCCCCAGCCCCAGCCCCCGCCCC
Equus_caballus_papillomavirus_8_strain_NCSU_complete_genome_NC_031756.1	8155	3820	3877	NODE_1646_length_738_cov_2.080182	393	337	59	84.746	4.97e-08	CCCCTGCCCCATCCC--GCCCGCACCCCCAGCCCCGGCCCCAGCCCCAGCCCCCGCCCC
Equus_caballus_papillomavirus_1_strain_150904_complete_genome_MF288893.1	7613	855	907	NODE_3_length_7874_cov_92.774785	1613	1558	56	76.786	0.043	CAGGGAAATTCCCTAGCACTGTTCCAGCAGCAGCAGGCGAGGGAAACGGAGGAGCA
Equus_caballus_papillomavirus_1_isolate_G2_complete_genome_MN164462.1	7611	855	907	NODE_3_length_7874_cov_92.774785	1613	1558	56	75	0.53	CAGGGAAATTCCCTAGCACTGTTCCAGCAGCAGCAGGCGAGGGAAACGGAGGAGCA
Equus_caballus_papillomavirus_type_1_complete_genome_AF498323.1	7610	855	907	NODE_3_length_7874_cov_92.774785	1613	1558	56	76.786	0.043	CAGGGAAATTCCCTAGCACTGTTCCAGCAGCAGCAGGCGAGGGAAACGGAGGAGCA
Equus_caballus_papillomavirus_type_1_complete_genome_NC_003748.1	7610	855	907	NODE_3_length_7874_cov_92.774785	1613	1558	56	76.786	0.043	CAGGGAAATTCCCTAGCACTGTTCCAGCAGCAGCAGGCGAGGGAAACGGAGGAGCA
Equine_papillomavirus_type_6_complete_genome_JQ965698.1	7551	290	342	NODE_19860_length_266_cov_1.306878	93	42	54	79.63	0.52	AAGAATTTCAGGGCAA-CCCATTTGCACGATT-AAGATACACTGCAAATATTGC
Equine_papillomavirus_type_6_complete_genome_NC_020500.1	7551	290	342	NODE_19860_length_266_cov_1.306878	93	42	54	79.63	0.52	AAGAATTTCAGGGCAA-CCCATTTGCACGATT-AAGATACACTGCAAATATTGC
Equine_papillomavirus_type_6_complete_genome_JQ965698.1	7551	1683	1735	NODE_3_length_7874_cov_92.774785	800	748	53	75.472	0.52	GAGGAGGCGATGAAATTTGAGTTTTCAGACATGGTGCAGTGGGCCTATGACAA
Equine_papillomavirus_type_6_complete_genome_NC_020500.1	7551	1683	1735	NODE_3_length_7874_cov_92.774785	800	748	53	75.472	0.52	GAGGAGGCGATGAAATTTGAGTTTTCAGACATGGTGCAGTGGGCCTATGACAA
Equus_caballus_papillomavirus_8_strain_NCSU_complete_genome_KU963288.1	8155	3820	3868	NODE_1646_length_738_cov_2.080182	370	321	50	86	2.11e-06	CCCCAGCCCCGGCCCCAGCCCCAGCCCCCGCCCCCACCGGCGGCCCCAGC
Equus_caballus_papillomavirus_8_strain_NCSU_complete_genome_NC_031756.1	8155	3820	3868	NODE_1646_length_738_cov_2.080182	370	321	50	86	2.11e-06	CCCCAGCCCCGGCCCCAGCCCCAGCCCCCGCCCCCACCGGCGGCCCCAGC
Equus_caballus_papillomavirus_8_strain_NCSU_complete_genome_KU963288.1	8155	3832	3879	NODE_1646_length_738_cov_2.080182	393	347	49	83.673	0.001	CCCCTGCCCCATCCC--GCCCGCACCCCCAGCCCCGGCCCCAGCCCCAG
Equus_caballus_papillomavirus_8_strain_NCSU_complete_genome_NC_031756.1	8155	3832	3879	NODE_1646_length_738_cov_2.080182	393	347	49	83.673	0.001	CCCCTGCCCCATCCC--GCCCGCACCCCCAGCCCCGGCCCCAGCCCCAG
Equus_caballus_papillomavirus_8_strain_NCSU_complete_genome_KU963288.1	8155	3820	3864	NODE_32169_length_239_cov_0.759259	37	83	47	82.979	0.001	CCCCACCCCCACCCTCACCCCCAGTCCCAGCCCCAGCGCGCTAGCCC
Equus_caballus_papillomavirus_8_strain_NCSU_complete_genome_NC_031756.1	8155	3820	3864	NODE_32169_length_239_cov_0.759259	37	83	47	82.979	0.001	CCCCACCCCCACCCTCACCCCCAGTCCCAGCCCCAGCGCGCTAGCCC
Equus_caballus_papillomavirus_8_strain_NCSU_complete_genome_KU963288.1	8155	3834	3875	NODE_26329_length_249_cov_0.813953	138	94	45	82.222	0.16	CCAGTCCCCAGCCCCAGCCTGCCCGTCCGTGCCCCAGGCCCATCC
Equus_caballus_papillomavirus_8_strain_NCSU_complete_genome_NC_031756.1	8155	3834	3875	NODE_26329_length_249_cov_0.813953	138	94	45	82.222	0.16	CCAGTCCCCAGCCCCAGCCTGCCCGTCCGTGCCCCAGGCCCATCC
Equus_ferus_caballus_papillomavirus_type_4_complete_genome_NC_020085.1	7554	3434	3477	NODE_3862_length_529_cov_1.424779	102	143	44	79.545	0.52	AGGCGTTGCA--GAGCGGCTGAGCGTACATCTGGAGGAGCTGCG
Equus_ferus_caballus_papillomavirus_type_4_complete_genome_JQ031032.1	7554	3434	3477	NODE_3862_length_529_cov_1.424779	102	143	44	79.545	0.52	AGGCGTTGCA--GAGCGGCTGAGCGTACATCTGGAGGAGCTGCG
Equus_caballus_papillomavirus_8_strain_NCSU_complete_genome_KU963288.1	8155	3833	3874	NODE_32169_length_239_cov_0.759259	33	73	42	83.333	0.047	CCCA-CCCCACCCCCACCCTCACCCCCAGTCCCAGCCCCAGC
Equus_caballus_papillomavirus_8_strain_NCSU_complete_genome_NC_031756.1	8155	3833	3874	NODE_32169_length_239_cov_0.759259	33	73	42	83.333	0.047	CCCA-CCCCACCCCCACCCTCACCCCCAGTCCCAGCCCCAGC
Equus_caballus_papillomavirus_8_strain_NCSU_complete_genome_KU963288.1	8155	3839	3879	NODE_32169_length_239_cov_0.759259	33	72	41	82.927	0.16	CCCA-CCCCACCCCCACCCTCACCCCCAGTCCCAGCCCCAG
Equus_caballus_papillomavirus_8_strain_NCSU_complete_genome_KU963288.1	8155	3840	3877	NODE_36767_length_230_cov_1.620915	149	189	41	80.488	0.57	CCAGGCCCCGCCCCAGCCCGGCCGGCCCTCGCCCCAGCCCC
Equus_caballus_papillomavirus_8_strain_NCSU_complete_genome_NC_031756.1	8155	3839	3879	NODE_32169_length_239_cov_0.759259	33	72	41	82.927	0.16	CCCA-CCCCACCCCCACCCTCACCCCCAGTCCCAGCCCCAG
Equus_caballus_papillomavirus_8_strain_NCSU_complete_genome_NC_031756.1	8155	3840	3877	NODE_36767_length_230_cov_1.620915	149	189	41	80.488	0.57	CCAGGCCCCGCCCCAGCCCGGCCGGCCCTCGCCCCAGCCCC
Equus_caballus_papillomavirus_8_strain_NCSU_complete_genome_KU963288.1	8155	3819	3853	NODE_199_length_1515_cov_20.501391	173	139	35	82.857	0.57	GCCGCAGCCCCCACCCCGCCCCCCGCCCCAGCCCC
Equus_caballus_papillomavirus_8_strain_NCSU_complete_genome_NC_031756.1	8155	3819	3853	NODE_199_length_1515_cov_20.501391	173	139	35	82.857	0.57	GCCGCAGCCCCCACCCCGCCCCCCGCCCCAGCCCC
Equus_caballus_papillomavirus_2_isolate_XJ-ks1391_complete_genome_MW410986.1	7802	1441	1474	NODE_3_length_7874_cov_92.774785	1249	1282	34	88.235	0.004	CTGGCACGCAGCACGTCCAAGTGCTGCGTGCCAG
Equine_papillomavirus_2_isolate_Zurich_2009_HM461973.1_complete_genome	7803	1442	1475	NODE_3_length_7874_cov_92.774785	1249	1282	34	88.235	0.004	CTGGCACGCAGCACGTCCAAGTGCTGCGTGCCAG
Equine_papillomavirus_2_complete_genome_EU503122.1	7802	1441	1474	NODE_3_length_7874_cov_92.774785	1249	1282	34	88.235	0.004	CTGGCACGCAGCACGTCCAAGTGCTGCGTGCCAG
Equine_papillomavirus_2_complete_genome_NC_012123.1	7802	1441	1474	NODE_3_length_7874_cov_92.774785	1249	1282	34	88.235	0.004	CTGGCACGCAGCACGTCCAAGTGCTGCGTGCCAG
Equus_caballus_papillomavirus_2_isolate_XJ-ks1391_complete_genome_MW410986.1	7802	1693	1722	NODE_5906_length_444_cov_1.024523	92	63	30	86.667	0.54	TTGTCCTGCGCTTGCTGTCTTTGCCTGCGC
Equine_papillomavirus_2_isolate_Zurich_2009_HM461973.1_complete_genome	7803	1694	1723	NODE_5906_length_444_cov_1.024523	92	63	30	86.667	0.54	TTGTCCTGCGCTTGCTGTCTTTGCCTGCGC
Equine_papillomavirus_2_complete_genome_EU503122.1	7802	1693	1722	NODE_5906_length_444_cov_1.024523	92	63	30	86.667	0.54	TTGTCCTGCGCTTGCTGTCTTTGCCTGCGC
Equine_papillomavirus_2_complete_genome_NC_012123.1	7802	1693	1722	NODE_5906_length_444_cov_1.024523	92	63	30	86.667	0.54	TTGTCCTGCGCTTGCTGTCTTTGCCTGCGC
Equus_caballus_papillomavirus_8_strain_NCSU_complete_genome_KU963288.1	8155	3818	3847	NODE_1646_length_738_cov_2.080182	366	337	30	93.333	0.001	AGCCCCGGCCCCAGCCCCAGCCCCCGCCCC
Equus_caballus_papillomavirus_8_strain_NCSU_complete_genome_NC_031756.1	8155	3818	3847	NODE_1646_length_738_cov_2.080182	366	337	30	93.333	0.001	AGCCCCGGCCCCAGCCCCAGCCCCCGCCCC
Equine_papillomavirus_type_6_complete_genome_JQ965698.1	7551	6844	6870	NODE_16962_length_286_cov_0.889952	29	1	29	89.655	0.52	TAATATATTTTCTAATTGTTTTACAAATC
Equine_papillomavirus_type_6_complete_genome_NC_020500.1	7551	6844	6870	NODE_16962_length_286_cov_0.889952	29	1	29	89.655	0.52	TAATATATTTTCTAATTGTTTTACAAATC
Equus_caballus_papillomavirus_2_isolate_XJ-ks1391_complete_genome_MW410986.1	7802	6967	6994	NODE_19652_length_267_cov_1.305263	252	225	28	92.857	0.013	GCCCTGTCGTCCCAGACCCCCAGCTCGC
Equine_papillomavirus_2_isolate_Zurich_2009_HM461973.1_complete_genome	7803	6968	6995	NODE_19652_length_267_cov_1.305263	252	225	28	92.857	0.013	GCCCTGTCGTCCCAGACCCCCAGCTCGC
Equine_papillomavirus_2_complete_genome_EU503122.1	7802	6967	6994	NODE_19652_length_267_cov_1.305263	252	225	28	92.857	0.013	GCCCTGTCGTCCCAGACCCCCAGCTCGC
Equine_papillomavirus_2_complete_genome_NC_012123.1	7802	6967	6994	NODE_19652_length_267_cov_1.305263	252	225	28	92.857	0.013	GCCCTGTCGTCCCAGACCCCCAGCTCGC
Equus_caballus_papillomavirus_1_strain_150904_complete_genome_MF288893.1	7613	3692	3717	NODE_18065_length_278_cov_0.706468	40	66	27	92.593	0.53	CCTCCTCACTGACTATGCCCCTTCCCC
Equus_caballus_papillomavirus_1_isolate_G2_complete_genome_MN164462.1	7611	3692	3717	NODE_18065_length_278_cov_0.706468	40	66	27	92.593	0.53	CCTCCTCACTGACTATGCCCCTTCCCC
Equus_caballus_papillomavirus_type_1_complete_genome_AF498323.1	7610	3692	3717	NODE_18065_length_278_cov_0.706468	40	66	27	92.593	0.53	CCTCCTCACTGACTATGCCCCTTCCCC
Equus_caballus_papillomavirus_type_1_complete_genome_NC_003748.1	7610	3692	3717	NODE_18065_length_278_cov_0.706468	40	66	27	92.593	0.53	CCTCCTCACTGACTATGCCCCTTCCCC
Equus_caballus_papillomavirus_8_strain_NCSU_complete_genome_KU963288.1	8155	3833	3859	NODE_28428_length_245_cov_1.476190	54	28	27	96.296	0.004	CCCAGCCCCAGCCGCAGCCCCAGCCCG
Equus_caballus_papillomavirus_8_strain_NCSU_complete_genome_NC_031756.1	8155	3833	3859	NODE_28428_length_245_cov_1.476190	54	28	27	96.296	0.004	CCCAGCCCCAGCCGCAGCCCCAGCCCG
Equus_caballus_papillomavirus_8_strain_NCSU_complete_genome_KU963288.1	8155	3827	3852	NODE_28428_length_245_cov_1.476190	54	29	26	96.154	0.013	CCCAGCCCCAGCCGCAGCCCCAGCCC
Equus_caballus_papillomavirus_8_strain_NCSU_complete_genome_KU963288.1	8155	3821	3846	NODE_28428_length_245_cov_1.476190	54	29	26	96.154	0.013	CCCAGCCCCAGCCGCAGCCCCAGCCC
Equus_caballus_papillomavirus_8_strain_NCSU_complete_genome_KU963288.1	8155	3851	3876	NODE_28428_length_245_cov_1.476190	54	29	26	92.308	0.16	CCCAGCCCCAGCCGCAGCCCCAGCCC
Equus_caballus_papillomavirus_8_strain_NCSU_complete_genome_KU963288.1	8155	3845	3870	NODE_28428_length_245_cov_1.476190	54	29	26	92.308	0.16	CCCAGCCCCAGCCGCAGCCCCAGCCC
Equus_caballus_papillomavirus_8_strain_NCSU_complete_genome_KU963288.1	8155	3839	3864	NODE_28428_length_245_cov_1.476190	54	29	26	92.308	0.16	CCCAGCCCCAGCCGCAGCCCCAGCCC
Equus_caballus_papillomavirus_8_strain_NCSU_complete_genome_NC_031756.1	8155	3827	3852	NODE_28428_length_245_cov_1.476190	54	29	26	96.154	0.013	CCCAGCCCCAGCCGCAGCCCCAGCCC
Equus_caballus_papillomavirus_8_strain_NCSU_complete_genome_NC_031756.1	8155	3821	3846	NODE_28428_length_245_cov_1.476190	54	29	26	96.154	0.013	CCCAGCCCCAGCCGCAGCCCCAGCCC
Equus_caballus_papillomavirus_8_strain_NCSU_complete_genome_NC_031756.1	8155	3851	3876	NODE_28428_length_245_cov_1.476190	54	29	26	92.308	0.16	CCCAGCCCCAGCCGCAGCCCCAGCCC
Equus_caballus_papillomavirus_8_strain_NCSU_complete_genome_NC_031756.1	8155	3845	3870	NODE_28428_length_245_cov_1.476190	54	29	26	92.308	0.16	CCCAGCCCCAGCCGCAGCCCCAGCCC
Equus_caballus_papillomavirus_8_strain_NCSU_complete_genome_NC_031756.1	8155	3839	3864	NODE_28428_length_245_cov_1.476190	54	29	26	92.308	0.16	CCCAGCCCCAGCCGCAGCCCCAGCCC
Equus_ferus_caballus_papillomavirus_type_5_complete_genome_JQ031033.1	7519	1635	1659	NODE_23667_length_254_cov_0.700565	58	34	25	92	0.52	GTAGGGCACGCTGCCGATGAGGATG
Equus_ferus_caballus_papillomavirus_type_5_complete_genome_NC_020084.1	7519	1635	1659	NODE_23667_length_254_cov_0.700565	58	34	25	92	0.52	GTAGGGCACGCTGCCGATGAGGATG
Equus_ferus_caballus_papillomavirus_type_7_complete_genome_JX035935.1	7619	6869	6893	NODE_742_length_971_cov_1.114094	751	727	25	96	0.043	AATAAAAAATAATTAAAAAACAAAT
Equus_ferus_caballus_papillomavirus_type_7_complete_genome_NC_020501.1	7619	6869	6893	NODE_742_length_971_cov_1.114094	751	727	25	96	0.043	AATAAAAAATAATTAAAAAACAAAT
Equus_ferus_caballus_papillomavirus_type_4_complete_genome_NC_020085.1	7554	263	286	NODE_638_length_1016_cov_1.149095	154	177	24	95.833	0.15	AGGATTTGAATGTGCGGTGCAAAC
Equus_ferus_caballus_papillomavirus_type_4_complete_genome_JQ031032.1	7554	263	286	NODE_638_length_1016_cov_1.149095	154	177	24	95.833	0.15	AGGATTTGAATGTGCGGTGCAAAC
Equus_caballus_papillomavirus_2_isolate_XJ-ks1391_complete_genome_MW410986.1	7802	5305	5327	NODE_35938_length_232_cov_0.800000	187	209	23	95.652	0.54	TGTGGGCGACACTGGTCAGGGTT
Equine_papillomavirus_2_isolate_Zurich_2009_HM461973.1_complete_genome	7803	5306	5328	NODE_35938_length_232_cov_0.800000	187	209	23	95.652	0.54	TGTGGGCGACACTGGTCAGGGTT
Equine_papillomavirus_2_complete_genome_EU503122.1	7802	5305	5327	NODE_35938_length_232_cov_0.800000	187	209	23	95.652	0.54	TGTGGGCGACACTGGTCAGGGTT
Equine_papillomavirus_2_complete_genome_NC_012123.1	7802	5305	5327	NODE_35938_length_232_cov_0.800000	187	209	23	95.652	0.54	TGTGGGCGACACTGGTCAGGGTT
Equus_ferus_caballus_papillomavirus_type_5_complete_genome_JQ031033.1	7519	5255	5277	NODE_5531_length_457_cov_0.918421	354	332	23	95.652	0.52	CAGGGCGGTCGAGGTGTCTCGGA
Equus_ferus_caballus_papillomavirus_type_5_complete_genome_NC_020084.1	7519	5255	5277	NODE_5531_length_457_cov_0.918421	354	332	23	95.652	0.52	CAGGGCGGTCGAGGTGTCTCGGA
Equus_caballus_papillomavirus_8_strain_NCSU_complete_genome_KU963288.1	8155	3818	3840	NODE_28428_length_245_cov_1.476190	51	29	23	95.652	0.57	AGCCCCAGCCGCAGCCCCAGCCC
Equus_caballus_papillomavirus_8_strain_NCSU_complete_genome_NC_031756.1	8155	3818	3840	NODE_28428_length_245_cov_1.476190	51	29	23	95.652	0.57	AGCCCCAGCCGCAGCCCCAGCCC
Equus_caballus_papillomavirus_9_strain_complete_genome_SW_MN117918.1	7656	508	528	NODE_20033_length_265_cov_1.601064	127	107	21	100	0.15	TTTTGACCAATCCTGAAAATG
Equus_caballus_papillomavirus_2_isolate_XJ-ks1391_complete_genome_MW410986.1	7802	3553	3572	NODE_26620_length_249_cov_0.715116	249	230	20	100	0.54	AGCCCGGACGGGGGACGAAA
Equine_papillomavirus_2_isolate_Zurich_2009_HM461973.1_complete_genome	7803	3554	3573	NODE_26620_length_249_cov_0.715116	249	230	20	100	0.54	AGCCCGGACGGGGGACGAAA
Equine_papillomavirus_2_complete_genome_EU503122.1	7802	3553	3572	NODE_26620_length_249_cov_0.715116	249	230	20	100	0.54	AGCCCGGACGGGGGACGAAA
Equine_papillomavirus_2_complete_genome_NC_012123.1	7802	3553	3572	NODE_26620_length_249_cov_0.715116	249	230	20	100	0.54	AGCCCGGACGGGGGACGAAA
Equus_caballus_papillomavirus_9_strain_complete_genome_SW_MN117918.1	7656	3121	3140	NODE_13871_length_313_cov_0.720339	83	64	20	100	0.53	CGAAGGGGAAGATGGAGAGG
Equus_caballus_papillomavirus_9_strain_complete_genome_SW_MN117918.1	7656	5366	5385	NODE_735_length_973_cov_3.675223	313	294	20	100	0.53	GCGCGCAGCCGGGCCTCGGC

## Sheet: ID2396_13-13
qseq ID	qlen	qstart	qend	subject ID	sstart	send	len	pident	evalue	seq
Equus_caballus_papillomavirus_9_strain_complete_genome_SW_MN117918.1	7656	3709	7656	NODE_2_length_7758_cov_5.722953	1	3947	3948	99.949	0	CCTTCTATCATCCTCTTGTCACCAGCACCACCGGAGACAACACAGAAGGAGTTCCCGCCTCTGTATGCGGCCCCTGCGGGTCCCCTGACACTCCAAGAAGCCCTCAAAGAAGATCACATCTCGGGAGGAGACGTTTGGCCTCATCTGACTGCAGCCCTCAGCAATCCAAGAGGTACTGCTCTTCGCAGCACAGAGGAGGCACACCTGGGCTGCCACCCTGTGAGCACGACCCACCCACACCCGTCTCTGGAAGCCAAGGGGTCCCTAGCCCCTCCCCTTCCACCCCCTGTGTGCAGAGCCCGGGTTCGACTGCTGCTGCATCGATACCGTCGCTCGGGAGTCCGTTGGAACCATCGGATTCTTCAGAGAGATCTGGGCCTGGTCTTTCTCCTGTTGGAC…
Equus_caballus_papillomavirus_9_strain_complete_genome_SW_MN117918.1	7656	1	3812	NODE_2_length_7758_cov_5.722953	3948	7758	3812	99.974	0	CCCCTTCCTGAAATATTTTTTTTTACATACCCCAATAAAGATGTATTATTCAGTTATGTGTCATGGTGTTTCATTGCACCGCGCCCGGTTCTGGCATTCAAACCCACCCTCTGAGCGCTGCTGGTACAGGTATAAGACCGCACCTGGTGTCAGTGTCAGCCAAGGTTCCAGGCCAGGAGCGCGGGCGGTGCGGCACACGTCCAGAGGATCCATTACCATCAATCAAGGTAAGGTCAAGGTAAGGCTAATTAAACACCGGGAACGGTGCCCTTATTGTTTGCAGGTGATTTATGGGGGCAATTCAGGCGGCAAACCGCGTGTGGTGCCCTGGAATGTGCAACCCTAGCGGTCTTCACCGGGTGCGGTGTGGCACTCCTAGGTTTGCTTTCTAATCTTCTA…
Equus_caballus_papillomavirus_2_isolate_XJ-ks1391_complete_genome_MW410986.1	7802	5609	7339	NODE_2_length_7758_cov_5.722953	2378	4096	1761	70.131	0	TTTGACCTGCACCCCTCACTCCTGAGGCGCAAGAGGAAACGGAGGTATGCTTCCTGTTTTCCAGATGGCATTGTGGACCAAGAATATGCAGCATCTGTACCTGCCGCCGCCGCCTGTTACTAAGGTGCTCAGCACGGATGACTATGTTGTCAGACACTCCATATTTTATCATGGCAACAGTGAGCGCTTGCTTACAGTGGGCCATCCCTATTTTGCACTTAAGGATGGGGGTAAAAAACTGGATGTTCCTAAGGTGTCCCCAAATCAGTATAGGGTGTTTGAGGTGGTTTTGCCAAACCCCAACAAATTTGCCTTAGCTGACCCTAGCATCTATAACCCAGAGGTGTCTAGGCTGGTGTGGGCAGTGCGGGGCCTAGAGGTTTCACGTGGTCAGCCTCT…
Equine_papillomavirus_2_isolate_Zurich_2009_HM461973.1_complete_genome	7803	5610	7340	NODE_2_length_7758_cov_5.722953	2378	4096	1761	70.358	0	TTTGACCTGCACCCCTCACTCCTGAGGCGCAAGAGGAAACGGAGGTATGCTTCCTGTTTTCCAGATGGCATTGTGGACCAAGAATATGCAGCATCTGTACCTGCCGCCGCCGCCTGTTACTAAGGTGCTCAGCACGGATGACTATGTTGTCAGACACTCCATATTTTATCATGGCAACAGTGAGCGCTTGCTTACAGTGGGCCATCCCTATTTTGCACTTAAGGATGGGGGTAAAAAACTGGATGTTCCTAAGGTGTCCCCAAATCAGTATAGGGTGTTTGAGGTGGTTTTGCCAAACCCCAACAAATTTGCCTTAGCTGACCCTAGCATCTATAACCCAGAGGTGTCTAGGCTGGTGTGGGCAGTGCGGGGCCTAGAGGTTTCACGTGGTCAGCCTCT…
Equine_papillomavirus_2_complete_genome_EU503122.1	7802	5609	7339	NODE_2_length_7758_cov_5.722953	2378	4096	1761	70.301	0	TTTGACCTGCACCCCTCACTCCTGAGGCGCAAGAGGAAACGGAGGTATGCTTCCTGTTTTCCAGATGGCATTGTGGACCAAGAATATGCAGCATCTGTACCTGCCGCCGCCGCCTGTTACTAAGGTGCTCAGCACGGATGACTATGTTGTCAGACACTCCATATTTTATCATGGCAACAGTGAGCGCTTGCTTACAGTGGGCCATCCCTATTTTGCACTTAAGGATGGGGGTAAAAAACTGGATGTTCCTAAGGTGTCCCCAAATCAGTATAGGGTGTTTGAGGTGGTTTTGCCAAACCCCAACAAATTTGCCTTAGCTGACCCTAGCATCTATAACCCAGAGGTGTCTAGGCTGGTGTGGGCAGTGCGGGGCCTAGAGGTTTCACGTGGTCAGCCTCT…
Equine_papillomavirus_2_complete_genome_NC_012123.1	7802	5609	7339	NODE_2_length_7758_cov_5.722953	2378	4096	1761	70.301	0	TTTGACCTGCACCCCTCACTCCTGAGGCGCAAGAGGAAACGGAGGTATGCTTCCTGTTTTCCAGATGGCATTGTGGACCAAGAATATGCAGCATCTGTACCTGCCGCCGCCGCCTGTTACTAAGGTGCTCAGCACGGATGACTATGTTGTCAGACACTCCATATTTTATCATGGCAACAGTGAGCGCTTGCTTACAGTGGGCCATCCCTATTTTGCACTTAAGGATGGGGGTAAAAAACTGGATGTTCCTAAGGTGTCCCCAAATCAGTATAGGGTGTTTGAGGTGGTTTTGCCAAACCCCAACAAATTTGCCTTAGCTGACCCTAGCATCTATAACCCAGAGGTGTCTAGGCTGGTGTGGGCAGTGCGGGGCCTAGAGGTTTCACGTGGTCAGCCTCT…
Equus_caballus_papillomavirus_2_isolate_XJ-ks1391_complete_genome_MW410986.1	7802	1263	2838	NODE_2_length_7758_cov_5.722953	5593	7150	1598	65.77	8.99e-89	CCACAAGTGAAGAGACGCCTGTTCGAGCCCCCTGCAGAC---AACCTCAGGGGCTCCTGC----AGCTATGAAGCTAATTCTGTTTACATCAGGACGAGCACGCAGGTAGGG---------GGTGTGGAGGGTGAGCG--TCCGGCACTGCGGGAGATTCAAAATG-GCCAGACACCCATTC-GGC-CGCCGGTCTTGGACGTACTCCAAGCTGGTAACAGGCAGGCGGCTATGCTTGCGCGCTTTAAAGAAGCCT---TTGAGGTCAGCTATACAGAACTCACCAGAGACTTTAAGAGTAATAAGACATGTACTGGGGACTGGGTAGCACTTGTATACAGTGTGCGTGAGGCGCACTATGAAAGTGCCAAGGAGCTGCTACAGCAGCATTGCGACTAT…
Equine_papillomavirus_2_isolate_Zurich_2009_HM461973.1_complete_genome	7803	1264	2839	NODE_2_length_7758_cov_5.722953	5593	7150	1598	65.707	1.1e-87	CCACAAGTGAAGAGACGCCTGTTCGAGCCCCCTGCAGAC---AACCTCAGGGGCTCCTGC----AGCTATGAAGCTAATTCTGTTTACATCAGGACGAGCACGCAGGTAGGG---------GGTGTGGAGGGTGAGCG--TCCGGCACTGCGGGAGATTCAAAATG-GCCAGACACCCATTC-GGC-CGCCGGTCTTGGACGTACTCCAAGCTGGTAACAGGCAGGCGGCTATGCTTGCGCGCTTTAAAGAAGCCT---TTGAGGTCAGCTATACAGAACTCACCAGAGACTTTAAGAGTAATAAGACATGTACTGGGGACTGGGTAGCACTTGTATACAGTGTGCGTGAGGCGCACTATGAAAGTGCCAAGGAGCTGCTACAGCAGCATTGCGACTAT…
Equine_papillomavirus_2_complete_genome_EU503122.1	7802	1263	2838	NODE_2_length_7758_cov_5.722953	5593	7150	1598	65.77	8.99e-89	CCACAAGTGAAGAGACGCCTGTTCGAGCCCCCTGCAGAC---AACCTCAGGGGCTCCTGC----AGCTATGAAGCTAATTCTGTTTACATCAGGACGAGCACGCAGGTAGGG---------GGTGTGGAGGGTGAGCG--TCCGGCACTGCGGGAGATTCAAAATG-GCCAGACACCCATTC-GGC-CGCCGGTCTTGGACGTACTCCAAGCTGGTAACAGGCAGGCGGCTATGCTTGCGCGCTTTAAAGAAGCCT---TTGAGGTCAGCTATACAGAACTCACCAGAGACTTTAAGAGTAATAAGACATGTACTGGGGACTGGGTAGCACTTGTATACAGTGTGCGTGAGGCGCACTATGAAAGTGCCAAGGAGCTGCTACAGCAGCATTGCGACTAT…
Equine_papillomavirus_2_complete_genome_NC_012123.1	7802	1263	2838	NODE_2_length_7758_cov_5.722953	5593	7150	1598	65.77	8.99e-89	CCACAAGTGAAGAGACGCCTGTTCGAGCCCCCTGCAGAC---AACCTCAGGGGCTCCTGC----AGCTATGAAGCTAATTCTGTTTACATCAGGACGAGCACGCAGGTAGGG---------GGTGTGGAGGGTGAGCG--TCCGGCACTGCGGGAGATTCAAAATG-GCCAGACACCCATTC-GGC-CGCCGGTCTTGGACGTACTCCAAGCTGGTAACAGGCAGGCGGCTATGCTTGCGCGCTTTAAAGAAGCCT---TTGAGGTCAGCTATACAGAACTCACCAGAGACTTTAAGAGTAATAAGACATGTACTGGGGACTGGGTAGCACTTGTATACAGTGTGCGTGAGGCGCACTATGAAAGTGCCAAGGAGCTGCTACAGCAGCATTGCGACTAT…
Equus_ferus_caballus_papillomavirus_type_5_complete_genome_JQ031033.1	7519	5398	6634	NODE_2_length_7758_cov_5.722953	2428	3682	1274	64.914	1.29e-48	TTCCTGTTTTCCAGATGGCATTGTGGACCAAGAATATGCAGCATCTGTACCTGCCGCCGCCGCCTGTTACTAAGGTGCTCAGCACGGATGACTATGTTGTCAGACACTCCATATTTTATCATGGCAACAGTGAGCGCTTGCTTACAGTGGGCCATCCCTATTTTGCACTTAAGGATGGGGGTAAAAAACTGGATGTTCCTAAGGTGTCCCCAAATCAGTATAGGGTGTTTGAGGTGGTTTTGCCAAACCCCAACAAATTTGC-CTT--AGCTGACCCTAGCATCTATAACCCAGAGGTGTCTAGGCTGGTGTGGGCAGTGCGGGGCCTAGAGGTTTCACGTGGTCAGCCTCTTGGTGTGGGTCTTTCAGGTAACCCTAACTTTAACCGCCTGTTAGATG…
Equus_ferus_caballus_papillomavirus_type_5_complete_genome_NC_020084.1	7519	5398	6634	NODE_2_length_7758_cov_5.722953	2428	3682	1274	64.914	1.29e-48	TTCCTGTTTTCCAGATGGCATTGTGGACCAAGAATATGCAGCATCTGTACCTGCCGCCGCCGCCTGTTACTAAGGTGCTCAGCACGGATGACTATGTTGTCAGACACTCCATATTTTATCATGGCAACAGTGAGCGCTTGCTTACAGTGGGCCATCCCTATTTTGCACTTAAGGATGGGGGTAAAAAACTGGATGTTCCTAAGGTGTCCCCAAATCAGTATAGGGTGTTTGAGGTGGTTTTGCCAAACCCCAACAAATTTGC-CTT--AGCTGACCCTAGCATCTATAACCCAGAGGTGTCTAGGCTGGTGTGGGCAGTGCGGGGCCTAGAGGTTTCACGTGGTCAGCCTCTTGGTGTGGGTCTTTCAGGTAACCCTAACTTTAACCGCCTGTTAGATG…
Equine_papillomavirus_3_isolate_Haflinger_GU384895.1_complete_genome	7582	5280	6510	NODE_2_length_7758_cov_5.722953	2414	3662	1271	64.28	1.48e-41	AAACGGAGGTATGCTTCCTGTTTTCCAGATGGCATTGTGGACCAAGAATATGCAGCATCTGTACCTGCCGCCGCCGCCTGTTACTAAGGTGC-TCAGCACGGATGACTATGTTGTCAGACACTC-CATATTTTATCATGGCAACAGTGAGCGCTTGCTTACAGTGGGCCATCCCTATTTT--GCA--CTTAAGGATGG---GGGTAAAAAACTGGATGTTCCTAAGGTGTCCCCAAATCAGTATAGGGTGTTTGAGGTGGTTTTGCCAAACCCCAACAAATTTGCCTTAGCTGACCCTAGCATCTATAACCCAGAGGTGTCTAGGCTGGTGTGGGCAGTGCGGGGCCTAGAGGTTTCACGTGGTCAGCCTCTTGGTGTGGGTCTTTCAGGTAACCCTAA…
Equine_papillomavirus_3_complete_genome_NC_017862.1	7582	5280	6510	NODE_2_length_7758_cov_5.722953	2414	3662	1271	64.28	1.48e-41	AAACGGAGGTATGCTTCCTGTTTTCCAGATGGCATTGTGGACCAAGAATATGCAGCATCTGTACCTGCCGCCGCCGCCTGTTACTAAGGTGC-TCAGCACGGATGACTATGTTGTCAGACACTC-CATATTTTATCATGGCAACAGTGAGCGCTTGCTTACAGTGGGCCATCCCTATTTT--GCA--CTTAAGGATGG---GGGTAAAAAACTGGATGTTCCTAAGGTGTCCCCAAATCAGTATAGGGTGTTTGAGGTGGTTTTGCCAAACCCCAACAAATTTGCCTTAGCTGACCCTAGCATCTATAACCCAGAGGTGTCTAGGCTGGTGTGGGCAGTGCGGGGCCTAGAGGTTTCACGTGGTCAGCCTCTTGGTGTGGGTCTTTCAGGTAACCCTAA…
Equine_papillomavirus_type_6_complete_genome_JQ965698.1	7551	5512	6547	NODE_2_length_7758_cov_5.722953	2619	3666	1074	64.898	4.51e-48	GATGTTCCTAAGGTGTCCCCAAATCAGTATAGGGTGTTTGAGGTGGTTTTGCCAAACCCCAACAAATTTGCCTTAGCTGACCCTAGCATCTATAACCCAGAGGTGTCTAGGCTGGTGTGGGCAGTGCGGGGCCTAGAGGTTTCACGTGGTCAGCCTCTTGGTGTGGGTCTTTCAGGTAACCCTAACTTTAACCGCCTGTTAGATGTGGAGAGCCCAAGTAAGGCACAGGACAACG----GGGCAGATAATG-ACAAGCGTGTCAATATAGCTTTTGATGTCAAGCAAAGCCAGGTTCTTATTGTGGGCTGCACACCTGCAATAGGGGAGCACTGGAAGTTGGCTAAGGCCTGTGGTGGTGTTCCTGCAG-----ACAACT----GCCCTCCTTTAGAGC…
Equine_papillomavirus_type_6_complete_genome_NC_020500.1	7551	5512	6547	NODE_2_length_7758_cov_5.722953	2619	3666	1074	64.898	4.51e-48	GATGTTCCTAAGGTGTCCCCAAATCAGTATAGGGTGTTTGAGGTGGTTTTGCCAAACCCCAACAAATTTGCCTTAGCTGACCCTAGCATCTATAACCCAGAGGTGTCTAGGCTGGTGTGGGCAGTGCGGGGCCTAGAGGTTTCACGTGGTCAGCCTCTTGGTGTGGGTCTTTCAGGTAACCCTAACTTTAACCGCCTGTTAGATGTGGAGAGCCCAAGTAAGGCACAGGACAACG----GGGCAGATAATG-ACAAGCGTGTCAATATAGCTTTTGATGTCAAGCAAAGCCAGGTTCTTATTGTGGGCTGCACACCTGCAATAGGGGAGCACTGGAAGTTGGCTAAGGCCTGTGGTGGTGTTCCTGCAG-----ACAACT----GCCCTCCTTTAGAGC…
Equus_caballus_papillomavirus_1_strain_150904_complete_genome_MF288893.1	7613	1629	2547	NODE_2_length_7758_cov_5.722953	6226	7147	937	65.315	2.36e-45	CACCAAACAGAAGATGCTATGAAATTTGATATGTCACAAATGGTGCAGTGGGCCTATGACAATAACTACATGGACGAAAGCA--CAATAGCATATCAATATGCCCTGATGGCAGATGTGGACAGGAATGCTGCTGCGTTTCT-GTCCTGTACTGCCCAGGCAAAATATGTTCGAGATGTGTCAACCATGGTGAAACACTATAAGCGGGCGGAGATGCATAGCATGAGTATGTCAAACTGGATTCATAA-ACAGTGTAACAGTGCAGAGGGCGAGGGTGATTGGAGGGTGATAATTAAGTTTCTAAAGTATCAGAATGTGGAAATACCCAGGTTTGTGACAAGC-CTAAAGCACTTTCTGAAAGGCGTCCCCAAAAAAAGCTGCTTAGCAATATTTGGGG…
Equus_caballus_papillomavirus_type_1_complete_genome_AF498323.1	7610	1629	2547	NODE_2_length_7758_cov_5.722953	6226	7147	937	65.422	1.93e-46	CACCAAACAGAAGATGCTATGAAATTTGATATGTCACAAATGGTGCAGTGGGCCTATGACAATAACTACATGGACGAAAGCA--CAATAGCATATCAATATGCCCTGATGGCAGATGTGGACAGGAATGCTGCTGCGTTTCT-GTCCTGTACTGCCCAGGCAAAATATGTTCGAGATGTGTCAACCATGGTGAAACACTATAAGCGGGCGGAGATGCATAGCATGAGTATGTCAAACTGGATTCATAA-ACAGTGTAACAGTGCAGAGGGCGAGGGTGATTGGAGGGTGATAATTAAGTTTCTAAAGTATCAGAATGTGGAAATACCCAGGTTTGTGACAAGC-CTAAAGCACTTTCTGAAAGGCGTCCCCAAAAAAAGCTGCTTAGCAATATTTGGGG…
Equus_caballus_papillomavirus_type_1_complete_genome_NC_003748.1	7610	1629	2547	NODE_2_length_7758_cov_5.722953	6226	7147	937	65.422	1.93e-46	CACCAAACAGAAGATGCTATGAAATTTGATATGTCACAAATGGTGCAGTGGGCCTATGACAATAACTACATGGACGAAAGCA--CAATAGCATATCAATATGCCCTGATGGCAGATGTGGACAGGAATGCTGCTGCGTTTCT-GTCCTGTACTGCCCAGGCAAAATATGTTCGAGATGTGTCAACCATGGTGAAACACTATAAGCGGGCGGAGATGCATAGCATGAGTATGTCAAACTGGATTCATAA-ACAGTGTAACAGTGCAGAGGGCGAGGGTGATTGGAGGGTGATAATTAAGTTTCTAAAGTATCAGAATGTGGAAATACCCAGGTTTGTGACAAGC-CTAAAGCACTTTCTGAAAGGCGTCCCCAAAAAAAGCTGCTTAGCAATATTTGGGG…
Equus_caballus_papillomavirus_1_isolate_G2_complete_genome_MN164462.1	7611	1629	2547	NODE_2_length_7758_cov_5.722953	6226	7147	936	65.064	2.87e-44	CACCAAACAGAAGATGCTATGAAATTTGATATGTCACAAATGGTGCAGTGGGCCTATGACAATAACTACATGGACGAAAGCA--CAATAGCATATCAATATGCCCTGATGGCAGATGTGGACAGGAATGCTGCTGCGTTTCT-GTCCTGTACTGCCCAGGCAAAATATGTTCGAGATGTGTCAACCATGGTGAAACACTATAAGCGGGCGGAGATGCATAGCATGAGTATGTCAAACTGGATTCATAA-ACAGTGTAACAGTGCAGAGGGCGAGGGTGATTGGAGGGTGATAATTAAGTTTCTAAAGTATCAGAATGTGGAAATACCCAGGTTTGTGACAAGC-CTAAAGCACTTTCTGAAAGGCGTCCCCAAAAAAAGCTGCTTAGCAATATTTGGGG…
Equus_caballus_papillomavirus_8_strain_NCSU_complete_genome_KU963288.1	8155	1743	2626	NODE_2_length_7758_cov_5.722953	6265	7148	892	63.229	1.23e-17	ATGGTGCAGTGGGCCTATGACAATAACTACATGGACGAAAGCACAATAGCATATCAATATGCCCTGATGGCAGATGTGGACAGGAATGCTGCTGCGTTTCTGTCCTGTACTGCCCAGGCAAAATATGTTCGAGA-TGTGTCAACCATGGTGAAACACTATAAGCGGGCGGAGATGCATAGCATGAGTATGTCAAACTGGATTCATAA-ACAGTGTAACAGTGCAGAGGGCGAGGGTGATTGGAGGGTGATAATTAAGTTTCTAAAGTATCAGAATGTGGAAATACCCAGGTTTGTGACAAGCCTAAAGCACTTTCTGAAAGGCGTCCCCAAAAAAAGCTGCTTAGCAATATTTGGGGAGC--CTGACACAGGGAAGTCCACATTTTGCTACAGCCTTAT…
Equus_caballus_papillomavirus_8_strain_NCSU_complete_genome_NC_031756.1	8155	1743	2626	NODE_2_length_7758_cov_5.722953	6265	7148	892	63.229	1.23e-17	ATGGTGCAGTGGGCCTATGACAATAACTACATGGACGAAAGCACAATAGCATATCAATATGCCCTGATGGCAGATGTGGACAGGAATGCTGCTGCGTTTCTGTCCTGTACTGCCCAGGCAAAATATGTTCGAGA-TGTGTCAACCATGGTGAAACACTATAAGCGGGCGGAGATGCATAGCATGAGTATGTCAAACTGGATTCATAA-ACAGTGTAACAGTGCAGAGGGCGAGGGTGATTGGAGGGTGATAATTAAGTTTCTAAAGTATCAGAATGTGGAAATACCCAGGTTTGTGACAAGCCTAAAGCACTTTCTGAAAGGCGTCCCCAAAAAAAGCTGCTTAGCAATATTTGGGGAGC--CTGACACAGGGAAGTCCACATTTTGCTACAGCCTTAT…
Equus_caballus_papillomavirus_2_isolate_XJ-ks1391_complete_genome_MW410986.1	7802	4182	4976	NODE_2_length_7758_cov_5.722953	930	1724	806	66.625	1.86e-59	CGCTGCCTGCAAAGCGCCGCCGCAGGGCGGCGGTAGAGGACCTTTACAAACAGTGCATAATGGGTGCTGATTGCCCGCCCGATGTGAGACCCCGAGTGGAAGGGGACACATTGGCTGACCGGATTTTGAAATGGGTCAGCTCATTTCTGTATTTGGGCAATTTAGGCATCAGCACCGGACGCGGTGGCACAGGAGGCACACTTGGATACCGGCCTTTGGGACGAGGCGTTGCAAGTGAAGGGGGGGGGAGTGTCCGCGTTGGCACCCCCGTTTCTGCGATTGAGCCTGGCCTGGCGCCAGGCACGGTGGGCCCCTCAGAGATAGTTCCTGTGGACACATTGCTTCCTACCACCCCCTCTGTGGTTCCTGTTGGGGAGGGGGAGGC---GGGGTTCATTC…
Equine_papillomavirus_2_isolate_Zurich_2009_HM461973.1_complete_genome	7803	4183	4977	NODE_2_length_7758_cov_5.722953	930	1724	806	66.377	9.62e-57	CGCTGCCTGCAAAGCGCCGCCGCAGGGCGGCGGTAGAGGACCTTTACAAACAGTGCATAATGGGTGCTGATTGCCCGCCCGATGTGAGACCCCGAGTGGAAGGGGACACATTGGCTGACCGGATTTTGAAATGGGTCAGCTCATTTCTGTATTTGGGCAATTTAGGCATCAGCACCGGACGCGGTGGCACAGGAGGCACACTTGGATACCGGCCTTTGGGACGAGGCGTTGCAAGTGAAGGGGGGGGGAGTGTCCGCGTTGGCACCCCCGTTTCTGCGATTGAGCCTGGCCTGGCGCCAGGCACGGTGGGCCCCTCAGAGATAGTTCCTGTGGACACATTGCTTCCTACCACCCCCTCTGTGGTTCCTGTTGGGGAGGGGGAGGC---GGGGTTCATTC…
Equine_papillomavirus_2_complete_genome_EU503122.1	7802	4182	4976	NODE_2_length_7758_cov_5.722953	930	1724	806	66.749	1.52e-60	CGCTGCCTGCAAAGCGCCGCCGCAGGGCGGCGGTAGAGGACCTTTACAAACAGTGCATAATGGGTGCTGATTGCCCGCCCGATGTGAGACCCCGAGTGGAAGGGGACACATTGGCTGACCGGATTTTGAAATGGGTCAGCTCATTTCTGTATTTGGGCAATTTAGGCATCAGCACCGGACGCGGTGGCACAGGAGGCACACTTGGATACCGGCCTTTGGGACGAGGCGTTGCAAGTGAAGGGGGGGGGAGTGTCCGCGTTGGCACCCCCGTTTCTGCGATTGAGCCTGGCCTGGCGCCAGGCACGGTGGGCCCCTCAGAGATAGTTCCTGTGGACACATTGCTTCCTACCACCCCCTCTGTGGTTCCTGTTGGGGAGGGGGAGGC---GGGGTTCATTC…
Equine_papillomavirus_2_complete_genome_NC_012123.1	7802	4182	4976	NODE_2_length_7758_cov_5.722953	930	1724	806	66.749	1.52e-60	CGCTGCCTGCAAAGCGCCGCCGCAGGGCGGCGGTAGAGGACCTTTACAAACAGTGCATAATGGGTGCTGATTGCCCGCCCGATGTGAGACCCCGAGTGGAAGGGGACACATTGGCTGACCGGATTTTGAAATGGGTCAGCTCATTTCTGTATTTGGGCAATTTAGGCATCAGCACCGGACGCGGTGGCACAGGAGGCACACTTGGATACCGGCCTTTGGGACGAGGCGTTGCAAGTGAAGGGGGGGGGAGTGTCCGCGTTGGCACCCCCGTTTCTGCGATTGAGCCTGGCCTGGCGCCAGGCACGGTGGGCCCCTCAGAGATAGTTCCTGTGGACACATTGCTTCCTACCACCCCCTCTGTGGTTCCTGTTGGGGAGGGGGAGGC---GGGGTTCATTC…
Equus_ferus_caballus_papillomavirus_type_4_complete_genome_NC_020085.1	7554	5410	6164	NODE_2_length_7758_cov_5.722953	2429	3183	766	67.102	3.96e-55	TCCTGTTTTCCAGATGGCATTGTGGAC-CAAGAATATGCAGCATCTGTACCTGCCGCCGCCGCCTGTTACTAAGGTGCTCAGCACGGATGACTATGTTGTCAGACACTCCATATTTTATCATGGCAACAGTGAGCGCTTGCTTACAGTGGGCCATCCCTATTTTGCACTTAAGGATGGGGGTAAAAAACTGGATGTTCCTAAGGTGTCCCCAAATCAGTATAGGGTGTTTGAGGTGGTTTTGCCAAACCCCAACAAATTTGCCTTAGCTGACCCTAGCATCTATAACCCAGAGGTGTCTAGGCTGGTGTGGGCAGTGCGGGGCCTAGAGGTTTCACGTGGTCAGCCTCTTGGTGTGGGTCTTTCA--GGTAACCCTAACTTTAACCGCCTGTTAGATGT…
Equus_ferus_caballus_papillomavirus_type_4_complete_genome_JQ031032.1	7554	5410	6164	NODE_2_length_7758_cov_5.722953	2429	3183	766	67.102	3.96e-55	TCCTGTTTTCCAGATGGCATTGTGGAC-CAAGAATATGCAGCATCTGTACCTGCCGCCGCCGCCTGTTACTAAGGTGCTCAGCACGGATGACTATGTTGTCAGACACTCCATATTTTATCATGGCAACAGTGAGCGCTTGCTTACAGTGGGCCATCCCTATTTTGCACTTAAGGATGGGGGTAAAAAACTGGATGTTCCTAAGGTGTCCCCAAATCAGTATAGGGTGTTTGAGGTGGTTTTGCCAAACCCCAACAAATTTGCCTTAGCTGACCCTAGCATCTATAACCCAGAGGTGTCTAGGCTGGTGTGGGCAGTGCGGGGCCTAGAGGTTTCACGTGGTCAGCCTCTTGGTGTGGGTCTTTCA--GGTAACCCTAACTTTAACCGCCTGTTAGATGT…
Equus_caballus_papillomavirus_8_strain_NCSU_complete_genome_KU963288.1	8155	6130	6796	NODE_2_length_7758_cov_5.722953	2466	3135	682	64.956	5.57e-22	CAGCATCTGTACCTGCCGCCGCCGCCTGTTACTAAGGTGCTCAGCACGGATGACTATGTTGTCAGACACTCCATATTTTATCATGGCAACAGTGAGCGCTTGCTTACAGTGGGCCATCCCTATTTTGCACTTAAGGATGGGGGTAAAAAACTGGATGTTCCTAAGGTGTCCCCAAATCAGTATAGGGTGTTTGAGGTGGTTTTGCCAAACCCCAACAAATTTGCCTTAGCTGACCCTAG-CA-TCTATAACCCAG-AGGTGTCTAGGCTGGTGTGGGCAGTGCGGGGCCTAGAGGTTTCACGTGGTCAGCCTCTTGGTGTGGGTCTTTCAGGTAACCCTAACTTTAACCGCCTGTTAGATGTGGAGAGCCCAAGTAAGGCACAGGACAACGGGGCAGAT…
Equus_caballus_papillomavirus_8_strain_NCSU_complete_genome_NC_031756.1	8155	6130	6796	NODE_2_length_7758_cov_5.722953	2466	3135	682	64.956	5.57e-22	CAGCATCTGTACCTGCCGCCGCCGCCTGTTACTAAGGTGCTCAGCACGGATGACTATGTTGTCAGACACTCCATATTTTATCATGGCAACAGTGAGCGCTTGCTTACAGTGGGCCATCCCTATTTTGCACTTAAGGATGGGGGTAAAAAACTGGATGTTCCTAAGGTGTCCCCAAATCAGTATAGGGTGTTTGAGGTGGTTTTGCCAAACCCCAACAAATTTGCCTTAGCTGACCCTAG-CA-TCTATAACCCAG-AGGTGTCTAGGCTGGTGTGGGCAGTGCGGGGCCTAGAGGTTTCACGTGGTCAGCCTCTTGGTGTGGGTCTTTCAGGTAACCCTAACTTTAACCGCCTGTTAGATGTGGAGAGCCCAAGTAAGGCACAGGACAACGGGGCAGAT…
Equus_ferus_caballus_papillomavirus_type_7_complete_genome_JX035935.1	7619	5964	6562	NODE_2_length_7758_cov_5.722953	3045	3658	622	67.685	1.31e-48	GGCTTTGGTGCAATGGATTTTAAAGCCTTGCAGGCCAGCAGGTCTGAGGTGCCCCTGGACCTGGTGGACACTACCTCCAAGTACCCTGACTACATACAAATGGGCCAGGAGACATCTGGAAACAGCATGTTTTTCTTTGCTCGCAGAGAGCAGATGTACACAAGGCATTTTATGGTTAGGGATGGGCTTTTAGAAAATGAAAAGGTACCCAAGGAGATGTATGTTGCCCGTGCACAGGAT----GATGACAAGAAAT-CCCACAGGTATCAGTACACACACACACCCAGTGGGTCTCTGGTGTCCACTGATTCTCAGATTTTTAACAGGCCCTACTGGCTGCAGCGCGCACAGGGCCTAAATAATGGCGTCTGCTGGCATGACAAGCTTTATGTTACAG…
Equus_ferus_caballus_papillomavirus_type_7_complete_genome_NC_020501.1	7619	5964	6562	NODE_2_length_7758_cov_5.722953	3045	3658	622	67.685	1.31e-48	GGCTTTGGTGCAATGGATTTTAAAGCCTTGCAGGCCAGCAGGTCTGAGGTGCCCCTGGACCTGGTGGACACTACCTCCAAGTACCCTGACTACATACAAATGGGCCAGGAGACATCTGGAAACAGCATGTTTTTCTTTGCTCGCAGAGAGCAGATGTACACAAGGCATTTTATGGTTAGGGATGGGCTTTTAGAAAATGAAAAGGTACCCAAGGAGATGTATGTTGCCCGTGCACAGGAT----GATGACAAGAAAT-CCCACAGGTATCAGTACACACACACACCCAGTGGGTCTCTGGTGTCCACTGATTCTCAGATTTTTAACAGGCCCTACTGGCTGCAGCGCGCACAGGGCCTAAATAATGGCGTCTGCTGGCATGACAAGCTTTATGTTACAG…
Equus_ferus_caballus_papillomavirus_type_7_complete_genome_JX035935.1	7619	2014	2589	NODE_2_length_7758_cov_5.722953	6568	7137	585	63.932	2.07e-14	AAGCACTTTCTGAAAGGCGTCCCCAAAAAAAGCTGCTTAGCAATATTTGGGGAGCCTGACACAGGGAAGTCCACATTTTGCTACAGCCTTATTAACTTTCTAAAGGGCAAAGTACTGTCCTTTGC--ATGCTCCAGAAGTCACTTCTGGCTT-AGTCCCCTAGCAGACTG-TCGGGTCGCCCTGGTGGATGATGCAAC-AGGGCCTGTCTGGGAGTACTTTGACCTGTACCTCAGAAATGCCCTTGATGGGAATCCCATCTTCGTGGACCTTAAGCACAGAGCACCCTTGCAGTTGAGGTGCCCCCCCATACTAGTCACCTCAAACATAGATGTGCGGAGGCAGGACAAATATCGGTACCTATACAGCAGGAT----GGCCTGCTTCACCTTTGACAAC…
Equus_ferus_caballus_papillomavirus_type_7_complete_genome_NC_020501.1	7619	2014	2589	NODE_2_length_7758_cov_5.722953	6568	7137	585	63.932	2.07e-14	AAGCACTTTCTGAAAGGCGTCCCCAAAAAAAGCTGCTTAGCAATATTTGGGGAGCCTGACACAGGGAAGTCCACATTTTGCTACAGCCTTATTAACTTTCTAAAGGGCAAAGTACTGTCCTTTGC--ATGCTCCAGAAGTCACTTCTGGCTT-AGTCCCCTAGCAGACTG-TCGGGTCGCCCTGGTGGATGATGCAAC-AGGGCCTGTCTGGGAGTACTTTGACCTGTACCTCAGAAATGCCCTTGATGGGAATCCCATCTTCGTGGACCTTAAGCACAGAGCACCCTTGCAGTTGAGGTGCCCCCCCATACTAGTCACCTCAAACATAGATGTGCGGAGGCAGGACAAATATCGGTACCTATACAGCAGGAT----GGCCTGCTTCACCTTTGACAAC…
Equus_ferus_caballus_papillomavirus_type_5_complete_genome_JQ031033.1	7519	2164	2571	NODE_2_length_7758_cov_5.722953	6749	7150	411	67.397	6.68e-27	TGGATGATGCAACAGGGCCTGTCTGGGAGTACTTTGACCTGTACCTCAGAAATGCCCTTGATGGGAATCCCATCTTCGTGGACCTTAAGCACAGAGCACCCTTGCAGTTGAGGTGCCCCCCCATACTAGTCACCTCAAACATAGATGTGCGGAGGCAGGACAAATATCGGTACCTATACAGCAGGATGGCCTGCTTCACCTTTGACAACCCCTATCCCCTGGATGAAAATGGAGAACCTGTATTTCCCCTAACTGTTGAACATTGGGCCTCTTTCTTTACAAGGTGGTGGAAACGCCTAGATCT----CAG--TGAACCAGAGGACGAAGGGGAAGATGGAGAGGCTA--CGGAAAGCTTTAGATGCTGTTCTAGAAGAGCAGATG-CTTCTCTATGAG…
Equus_ferus_caballus_papillomavirus_type_5_complete_genome_NC_020084.1	7519	2164	2571	NODE_2_length_7758_cov_5.722953	6749	7150	411	67.397	6.68e-27	TGGATGATGCAACAGGGCCTGTCTGGGAGTACTTTGACCTGTACCTCAGAAATGCCCTTGATGGGAATCCCATCTTCGTGGACCTTAAGCACAGAGCACCCTTGCAGTTGAGGTGCCCCCCCATACTAGTCACCTCAAACATAGATGTGCGGAGGCAGGACAAATATCGGTACCTATACAGCAGGATGGCCTGCTTCACCTTTGACAACCCCTATCCCCTGGATGAAAATGGAGAACCTGTATTTCCCCTAACTGTTGAACATTGGGCCTCTTTCTTTACAAGGTGGTGGAAACGCCTAGATCT----CAG--TGAACCAGAGGACGAAGGGGAAGATGGAGAGGCTA--CGGAAAGCTTTAGATGCTGTTCTAGAAGAGCAGATG-CTTCTCTATGAG…
Equus_ferus_caballus_papillomavirus_type_4_complete_genome_NC_020085.1	7554	6296	6639	NODE_2_length_7758_cov_5.722953	3324	3667	348	71.552	3.47e-43	CCCAGTGGGTCTCTGGTGTCCACTGATTCTCAGATTTTTAACAGGCCCTACTGGCTGCAGCGCGCACAGGGCCTAAATAATGGCGTCTGCTGGCATGACAAGCTTTATGTTACAGTGTTTGACAATACTAGGGGCACCAACTTTACTATATCTGT----AAAGAAGCAGGCGGCTGGTGGTGATCAGTATGATCCTAAGAACTATCATGTGTACCTCAGGCATGTAGAGGAGTTTGAACTATCTTTTATTTTTGAGCTTTGCAGCGTGCCACTGACCCCGGAGACCATGGCGCACCTGCACACTATGGACCCCACCATATTAGAGGACTGGGAGATAGGCATTAACCC
Equus_ferus_caballus_papillomavirus_type_4_complete_genome_JQ031032.1	7554	6296	6639	NODE_2_length_7758_cov_5.722953	3324	3667	348	71.552	3.47e-43	CCCAGTGGGTCTCTGGTGTCCACTGATTCTCAGATTTTTAACAGGCCCTACTGGCTGCAGCGCGCACAGGGCCTAAATAATGGCGTCTGCTGGCATGACAAGCTTTATGTTACAGTGTTTGACAATACTAGGGGCACCAACTTTACTATATCTGT----AAAGAAGCAGGCGGCTGGTGGTGATCAGTATGATCCTAAGAACTATCATGTGTACCTCAGGCATGTAGAGGAGTTTGAACTATCTTTTATTTTTGAGCTTTGCAGCGTGCCACTGACCCCGGAGACCATGGCGCACCTGCACACTATGGACCCCACCATATTAGAGGACTGGGAGATAGGCATTAACCC
Equus_caballus_papillomavirus_8_strain_NCSU_complete_genome_KU963288.1	8155	6966	7307	NODE_2_length_7758_cov_5.722953	3311	3652	347	66.859	1.6e-22	GTACACACACACACCCAGTGGGTCTCTGGTGTCCACTGATTCTCAGATTTTTAACAGGCCCTACTGGCTGCAGCGCGCACAGGGCCTAAATAATGGCGTCTGCTGGCATGACAAGCTTTATGTTACAGTGTTTGACAATACTAGGGGCACCAACTTTACTATATCTGT-----AAAGAAGCAGGCGGCTGGTGGTGATCAGTATGATCCTAAGAACTATCATGTGTACCTCAGGCATGTAGAGGAGTTTGAACTATCTTTTATTTTTGAGCTTTGCAGCGTGCCACTGACCCCGGAGACCATGGCGCACCTGCACACTATGGACCCCACCATATTAGAGGACTGGGA
Equus_caballus_papillomavirus_8_strain_NCSU_complete_genome_NC_031756.1	8155	6966	7307	NODE_2_length_7758_cov_5.722953	3311	3652	347	66.859	1.6e-22	GTACACACACACACCCAGTGGGTCTCTGGTGTCCACTGATTCTCAGATTTTTAACAGGCCCTACTGGCTGCAGCGCGCACAGGGCCTAAATAATGGCGTCTGCTGGCATGACAAGCTTTATGTTACAGTGTTTGACAATACTAGGGGCACCAACTTTACTATATCTGT-----AAAGAAGCAGGCGGCTGGTGGTGATCAGTATGATCCTAAGAACTATCATGTGTACCTCAGGCATGTAGAGGAGTTTGAACTATCTTTTATTTTTGAGCTTTGCAGCGTGCCACTGACCCCGGAGACCATGGCGCACCTGCACACTATGGACCCCACCATATTAGAGGACTGGGA
Equus_caballus_papillomavirus_type_1_complete_genome_AF498323.1	7610	5136	5464	NODE_2_length_7758_cov_5.722953	2377	2689	335	65.373	5.55e-09	CTTTGACCTGCACCCCTCACTCCTGAGGCGCAAGAGGAAACGGAGGTA----------TGCTTCCTGTTTTCCAGAT------GGCATTGTGGACCAAGAATATGCAGCATCTGTACCTGCCGCCGCCGCCTGTTACTAAGGTGCTCAGCACGGATGACTATGTTGTCAGACACTCCATATTTTATCATGGCAACAGTGAGCGCTTGCTTACAGTGGGCCATCCCTATTTTGC-ACTTAA-GGATGGGGGT-AAAAAAC--TGGATGTTCCTAAGGTGTCCCCAAATCAGTATAGGGTGTTTGAG-GTGGTTTTGCCAAACCCCAACAAATTTGC
Equus_caballus_papillomavirus_type_1_complete_genome_NC_003748.1	7610	5136	5464	NODE_2_length_7758_cov_5.722953	2377	2689	335	65.373	5.55e-09	CTTTGACCTGCACCCCTCACTCCTGAGGCGCAAGAGGAAACGGAGGTA----------TGCTTCCTGTTTTCCAGAT------GGCATTGTGGACCAAGAATATGCAGCATCTGTACCTGCCGCCGCCGCCTGTTACTAAGGTGCTCAGCACGGATGACTATGTTGTCAGACACTCCATATTTTATCATGGCAACAGTGAGCGCTTGCTTACAGTGGGCCATCCCTATTTTGC-ACTTAA-GGATGGGGGT-AAAAAAC--TGGATGTTCCTAAGGTGTCCCCAAATCAGTATAGGGTGTTTGAG-GTGGTTTTGCCAAACCCCAACAAATTTGC
Equus_caballus_papillomavirus_1_strain_150904_complete_genome_MF288893.1	7613	6138	6461	NODE_2_length_7758_cov_5.722953	3348	3671	326	67.485	2.21e-20	GATTCTCAGATTTTTAACAGGCCCTACTGGCTGCAGCGCGCACAGGGCCTAAATAATGGCGTCTGCTGGCATGACAAGCTTTATGTTACAGTGTTTGACAATACTAGGGGCACCAACTTTACTATATCTGTAAAGAAGCAGGCG-GCTGGTG-GTGATCAGTATGATCCTAAGAACTATCATGTGTACCTCAGGCATGTAGAGGAGTTTGAACTATCTTTTATTTTTGAGCTTTGCAGCGTGCCACTGACCCCGGAGACCATGGCGCACCTGCACACTATGGACCCCACCATATTAGAGGACTGGGAGATAGGCATTAACCCCCCT
Equus_caballus_papillomavirus_1_isolate_G2_complete_genome_MN164462.1	7611	6135	6458	NODE_2_length_7758_cov_5.722953	3348	3671	326	67.178	2.69e-19	GATTCTCAGATTTTTAACAGGCCCTACTGGCTGCAGCGCGCACAGGGCCTAAATAATGGCGTCTGCTGGCATGACAAGCTTTATGTTACAGTGTTTGACAATACTAGGGGCACCAACTTTACTATATCTGTAAAGAAGCAGGCG-GCTGGTG-GTGATCAGTATGATCCTAAGAACTATCATGTGTACCTCAGGCATGTAGAGGAGTTTGAACTATCTTTTATTTTTGAGCTTTGCAGCGTGCCACTGACCCCGGAGACCATGGCGCACCTGCACACTATGGACCCCACCATATTAGAGGACTGGGAGATAGGCATTAACCCCCCT
Equus_caballus_papillomavirus_type_1_complete_genome_AF498323.1	7610	6135	6458	NODE_2_length_7758_cov_5.722953	3348	3671	326	67.485	2.21e-20	GATTCTCAGATTTTTAACAGGCCCTACTGGCTGCAGCGCGCACAGGGCCTAAATAATGGCGTCTGCTGGCATGACAAGCTTTATGTTACAGTGTTTGACAATACTAGGGGCACCAACTTTACTATATCTGTAAAGAAGCAGGCG-GCTGGTG-GTGATCAGTATGATCCTAAGAACTATCATGTGTACCTCAGGCATGTAGAGGAGTTTGAACTATCTTTTATTTTTGAGCTTTGCAGCGTGCCACTGACCCCGGAGACCATGGCGCACCTGCACACTATGGACCCCACCATATTAGAGGACTGGGAGATAGGCATTAACCCCCCT
Equus_caballus_papillomavirus_type_1_complete_genome_NC_003748.1	7610	6135	6458	NODE_2_length_7758_cov_5.722953	3348	3671	326	67.485	2.21e-20	GATTCTCAGATTTTTAACAGGCCCTACTGGCTGCAGCGCGCACAGGGCCTAAATAATGGCGTCTGCTGGCATGACAAGCTTTATGTTACAGTGTTTGACAATACTAGGGGCACCAACTTTACTATATCTGTAAAGAAGCAGGCG-GCTGGTG-GTGATCAGTATGATCCTAAGAACTATCATGTGTACCTCAGGCATGTAGAGGAGTTTGAACTATCTTTTATTTTTGAGCTTTGCAGCGTGCCACTGACCCCGGAGACCATGGCGCACCTGCACACTATGGACCCCACCATATTAGAGGACTGGGAGATAGGCATTAACCCCCCT
Equus_ferus_caballus_papillomavirus_type_4_complete_genome_NC_020085.1	7554	2130	2427	NODE_2_length_7758_cov_5.722953	6742	7039	300	66.333	2.05e-14	GCCCTGGTGGATGATGCAACAGGGCCTGTCTGGGAGTACTTTGACCTGTACCTCAGAAATGCCCTTGATGGGAATCCCATCTTCGTGGACCTTAAGCACAGAGCACCCTTGCAGTTGAGGTGCCCCCCCATACTAGTCACCTCAAACATAGATGTGCGGAGGCAGGAC--AAATATCGGTACCTATACAGCAGGATGGCCTGCTTCACCTTTGACAACCCCTATCCCCTGGATGAAAATGGAGAACCTGTATTTCCCCTAACTGTTGAACATTGGGCCTCTTTCTTTACAAGGTGGTGGA
Equus_ferus_caballus_papillomavirus_type_4_complete_genome_JQ031032.1	7554	2130	2427	NODE_2_length_7758_cov_5.722953	6742	7039	300	66.333	2.05e-14	GCCCTGGTGGATGATGCAACAGGGCCTGTCTGGGAGTACTTTGACCTGTACCTCAGAAATGCCCTTGATGGGAATCCCATCTTCGTGGACCTTAAGCACAGAGCACCCTTGCAGTTGAGGTGCCCCCCCATACTAGTCACCTCAAACATAGATGTGCGGAGGCAGGAC--AAATATCGGTACCTATACAGCAGGATGGCCTGCTTCACCTTTGACAACCCCTATCCCCTGGATGAAAATGGAGAACCTGTATTTCCCCTAACTGTTGAACATTGGGCCTCTTTCTTTACAAGGTGGTGGA
Equus_ferus_caballus_papillomavirus_type_4_complete_genome_NC_020085.1	7554	3991	4239	NODE_2_length_7758_cov_5.722953	941	1198	263	67.681	2.5e-13	AAGCGCCGCCGCAGGGCGGCGGTAGAGGACCTTTACAAACAG-TGCATAATGGGTGCTGATTGCCCGCCCGATGTGAGACCCCGAGTGGAAGGGGACACATTGGCTGACCGGATTTTGAAATGGGTCAGCTCATTTCTGTATTTGGGCAATTTAGGCATCAG---CACCGGACGCGGTGGCACAGGAGGCACACTTGGATACCGGCCTTTGGGACGAGGCGTTGCAAG-TGAAGGGGGGGGGAGTGTCCGCGTTGGCACCCCC
Equus_ferus_caballus_papillomavirus_type_4_complete_genome_JQ031032.1	7554	3991	4239	NODE_2_length_7758_cov_5.722953	941	1198	263	67.681	2.5e-13	AAGCGCCGCCGCAGGGCGGCGGTAGAGGACCTTTACAAACAG-TGCATAATGGGTGCTGATTGCCCGCCCGATGTGAGACCCCGAGTGGAAGGGGACACATTGGCTGACCGGATTTTGAAATGGGTCAGCTCATTTCTGTATTTGGGCAATTTAGGCATCAG---CACCGGACGCGGTGGCACAGGAGGCACACTTGGATACCGGCCTTTGGGACGAGGCGTTGCAAG-TGAAGGGGGGGGGAGTGTCCGCGTTGGCACCCCC
Equus_caballus_papillomavirus_1_strain_150904_complete_genome_MF288893.1	7613	5313	5552	NODE_2_length_7758_cov_5.722953	2538	2774	246	69.106	8.8e-13	ATATTTTATCATGGCAACAGTGAGCGCTTGCTTACAGTGGGCCATCCCTATTTTGC-ACTTAAGGA-TGGGGGTAAA-AAAC--TGGATGTTCCTAAGGTGTCCCCAAATCAGTATAGGGTGTTTGAG-GTGGTTTTGCCAAACCCCAACAAATTTGCCTTAGCTGACCCTAGCA---TCTATAACCCAGAGGTGTCTAGGCTGGTGTGGGCAGTGCGGGGCCTAGAGGTTTCACGTGGTCAGCCT
Equus_caballus_papillomavirus_type_1_complete_genome_AF498323.1	7610	5310	5518	NODE_2_length_7758_cov_5.722953	2538	2743	215	70.233	3.07e-12	ATATTTTATCATGGCAACAGTGAGCGCTTGCTTACAGTGGGCCATCCCTATTTTGC-ACTTAAGGA-TGGGGGTAAA-AAAC--TGGATGTTCCTAAGGTGTCCCCAAATCAGTATAGGGTGTTTGAG-GTGGTTTTGCCAAACCCCAACAAATTTGCCTTAGCTGACCCTAGCA---TCTATAACCCAGAGGTGTCTAGGCTGGTGTGGGCAGT
Equus_caballus_papillomavirus_type_1_complete_genome_NC_003748.1	7610	5310	5518	NODE_2_length_7758_cov_5.722953	2538	2743	215	70.233	3.07e-12	ATATTTTATCATGGCAACAGTGAGCGCTTGCTTACAGTGGGCCATCCCTATTTTGC-ACTTAAGGA-TGGGGGTAAA-AAAC--TGGATGTTCCTAAGGTGTCCCCAAATCAGTATAGGGTGTTTGAG-GTGGTTTTGCCAAACCCCAACAAATTTGCCTTAGCTGACCCTAGCA---TCTATAACCCAGAGGTGTCTAGGCTGGTGTGGGCAGT
Equus_caballus_papillomavirus_2_isolate_XJ-ks1391_complete_genome_MW410986.1	7802	951	1142	NODE_2_length_7758_cov_5.722953	5280	5472	199	68.844	1.99e-08	GGACGCTGACCCAGGTACAAGCCCCGGGGAGGGGTGCAGCGGAGCATGCTTCATTTTA---AGGGAGGCACAGTGCAGCGACCCTGATAGCGGGGATGA-TGAGGGAGACACCCCAGACAG--TCCAGGTGCCTATGATTTTGTAGATAACGCCTTTGTGAAGCAGGGAAATTCCCTATCTCTATACCAGCAGCAGGAG
Equine_papillomavirus_2_isolate_Zurich_2009_HM461973.1_complete_genome	7803	951	1143	NODE_2_length_7758_cov_5.722953	5280	5472	199	69.849	3.15e-12	GGACGCTGACCCAGGTACAAGCCCCGGGGAGGGGTGCAGCGGAGCATGCTTCATTTTA---AGGGAGGCACAGTGCAGCGACCCTGATAGCGGGGATGA-TGAGGGAGACACCCCAGACAG--TCCAGGTGCCTATGATTTTGTAGATAACGCCTTTGTGAAGCAGGGAAATTCCCTATCTCTATACCAGCAGCAGGAG
Equine_papillomavirus_2_complete_genome_EU503122.1	7802	951	1142	NODE_2_length_7758_cov_5.722953	5280	5472	199	68.844	1.99e-08	GGACGCTGACCCAGGTACAAGCCCCGGGGAGGGGTGCAGCGGAGCATGCTTCATTTTA---AGGGAGGCACAGTGCAGCGACCCTGATAGCGGGGATGA-TGAGGGAGACACCCCAGACAG--TCCAGGTGCCTATGATTTTGTAGATAACGCCTTTGTGAAGCAGGGAAATTCCCTATCTCTATACCAGCAGCAGGAG
Equine_papillomavirus_2_complete_genome_NC_012123.1	7802	951	1142	NODE_2_length_7758_cov_5.722953	5280	5472	199	68.844	1.99e-08	GGACGCTGACCCAGGTACAAGCCCCGGGGAGGGGTGCAGCGGAGCATGCTTCATTTTA---AGGGAGGCACAGTGCAGCGACCCTGATAGCGGGGATGA-TGAGGGAGACACCCCAGACAG--TCCAGGTGCCTATGATTTTGTAGATAACGCCTTTGTGAAGCAGGGAAATTCCCTATCTCTATACCAGCAGCAGGAG
Equine_papillomavirus_3_isolate_Haflinger_GU384895.1_complete_genome	7582	2709	2899	NODE_2_length_7758_cov_5.722953	7291	7481	195	66.667	0.001	GGCCATAGGCATGGAACTGCGCCT-GACAAGCCTGGCA-CAGTCCGCCTTTGCAGAGGAGCCCTGGACAATGACTGACACCAGTCATGAAACCTTTTGTGCAGCACCAACAGAGACCTTTAAAAAAGAGGGCAGTG--TGGTAACTGTGACATTTGATGGTGAAAGGGGGAATGACATGTGGTACACAAAATGGG
Equine_papillomavirus_3_complete_genome_NC_017862.1	7582	2709	2899	NODE_2_length_7758_cov_5.722953	7291	7481	195	66.667	0.001	GGCCATAGGCATGGAACTGCGCCT-GACAAGCCTGGCA-CAGTCCGCCTTTGCAGAGGAGCCCTGGACAATGACTGACACCAGTCATGAAACCTTTTGTGCAGCACCAACAGAGACCTTTAAAAAAGAGGGCAGTG--TGGTAACTGTGACATTTGATGGTGAAAGGGGGAATGACATGTGGTACACAAAATGGG
Equine_papillomavirus_type_6_complete_genome_JQ965698.1	7551	1697	1879	NODE_2_length_7758_cov_5.722953	6249	6431	188	72.34	7.17e-14	ATTTGATATGTCACAAATGGTGCAGTGGGCCTATGACAATAACTA-CATGGAC-GAAAGCACAATAGCATATCAATATGCCCTGATGGCAGATGTGGACAGGAATGCTGCTGCGTTTCTGTCCTGTACTGCCCAGGCAAAATATGTTC-GAGA-TG-TGTCAACCATGGTGAAACACTATAAGCGGGC
Equine_papillomavirus_type_6_complete_genome_NC_020500.1	7551	1697	1879	NODE_2_length_7758_cov_5.722953	6249	6431	188	72.34	7.17e-14	ATTTGATATGTCACAAATGGTGCAGTGGGCCTATGACAATAACTA-CATGGAC-GAAAGCACAATAGCATATCAATATGCCCTGATGGCAGATGTGGACAGGAATGCTGCTGCGTTTCTGTCCTGTACTGCCCAGGCAAAATATGTTC-GAGA-TG-TGTCAACCATGGTGAAACACTATAAGCGGGC
Equus_ferus_caballus_papillomavirus_type_5_complete_genome_JQ031033.1	7519	3980	4165	NODE_2_length_7758_cov_5.722953	929	1114	186	70.968	3.24e-18	GCGCTGCCTGCAAAGCGCCGCCGCAGGGCGGCGGTAGAGGACCTTTACAAACAGTGCATAATGGGTGCTGATTGCCCGCCCGATGTGAGACCCCGAGTGGAAGGGGACACATTGGCTGACCGGATTTTGAAATGGGTCAGCTCATTTCTGTATTTGGGCAATTTAGGCATCAGCACCGGACGCGGT
Equus_ferus_caballus_papillomavirus_type_5_complete_genome_NC_020084.1	7519	3980	4165	NODE_2_length_7758_cov_5.722953	929	1114	186	70.968	3.24e-18	GCGCTGCCTGCAAAGCGCCGCCGCAGGGCGGCGGTAGAGGACCTTTACAAACAGTGCATAATGGGTGCTGATTGCCCGCCCGATGTGAGACCCCGAGTGGAAGGGGACACATTGGCTGACCGGATTTTGAAATGGGTCAGCTCATTTCTGTATTTGGGCAATTTAGGCATCAGCACCGGACGCGGT
Equus_caballus_papillomavirus_8_strain_NCSU_complete_genome_KU963288.1	8155	1280	1456	NODE_2_length_7758_cov_5.722953	5796	5972	182	67.582	0.019	GGCGGCTATGCTTGCGCGCTTTAAAGAAGCCTTTGAGG--TCAGCTATACAGAACTCACCAGAGACTTTAAGAGTAATAAGACATGTACTGGGGACTGGGTA--GCACTTGTATACAGTGTGCGTGAGGCGCACTATGAAAGTGCCAAGGAGCTGCT-ACAGCAGCATTGCGACTATCTGCA
Equus_caballus_papillomavirus_8_strain_NCSU_complete_genome_NC_031756.1	8155	1280	1456	NODE_2_length_7758_cov_5.722953	5796	5972	182	67.582	0.019	GGCGGCTATGCTTGCGCGCTTTAAAGAAGCCTTTGAGG--TCAGCTATACAGAACTCACCAGAGACTTTAAGAGTAATAAGACATGTACTGGGGACTGGGTA--GCACTTGTATACAGTGTGCGTGAGGCGCACTATGAAAGTGCCAAGGAGCTGCT-ACAGCAGCATTGCGACTATCTGCA
Equus_caballus_papillomavirus_1_isolate_G2_complete_genome_MN164462.1	7611	5310	5460	NODE_2_length_7758_cov_5.722953	2538	2685	154	72.078	1.94e-08	ATATTTTATCATGGCAACAGTGAGCGCTTGCTTACAGTGGGCCATCCCTATTTTGC-ACTTAAGGA-TGGGGGTAAA-AAAC--TGGATGTTCCTAAGGTGTCCCCAAATCAGTATAGGGTGTTTGAG-GTGGTTTTGCCAAACCCCAACAAAT
Equus_ferus_caballus_papillomavirus_type_5_complete_genome_JQ031033.1	7519	2967	3102	NODE_2_length_7758_cov_5.722953	7546	7681	139	68.345	0.001	AGGCCTGTGGTACCTCAGAGAGGGCCAGCAGCACTACTATG-TAAAGTTT--GCTGAGGATGCTAACAGGTATGGCAAACATGGAACATGGGAGGTGAAAGATGGTAATGAAACCTTCTATCATCCTCTTGTCACCAGC
Equus_ferus_caballus_papillomavirus_type_5_complete_genome_NC_020084.1	7519	2967	3102	NODE_2_length_7758_cov_5.722953	7546	7681	139	68.345	0.001	AGGCCTGTGGTACCTCAGAGAGGGCCAGCAGCACTACTATG-TAAAGTTT--GCTGAGGATGCTAACAGGTATGGCAAACATGGAACATGGGAGGTGAAAGATGGTAATGAAACCTTCTATCATCCTCTTGTCACCAGC
Equine_papillomavirus_type_6_complete_genome_JQ965698.1	7551	2800	2935	NODE_2_length_7758_cov_5.722953	7346	7481	137	67.883	0.005	GAGCCCTGGACAATGACTGACACCAGTCATGAAACCTTTTGTGCAGCACCAACAGAGACCTTTAAAAAAGAGGGCA-GTGTGGTAACTGTGACATTTGATGGTGAAAGGGGGAATGACATGTGGTACACAAAATGGG
Equine_papillomavirus_type_6_complete_genome_NC_020500.1	7551	2800	2935	NODE_2_length_7758_cov_5.722953	7346	7481	137	67.883	0.005	GAGCCCTGGACAATGACTGACACCAGTCATGAAACCTTTTGTGCAGCACCAACAGAGACCTTTAAAAAAGAGGGCA-GTGTGGTAACTGTGACATTTGATGGTGAAAGGGGGAATGACATGTGGTACACAAAATGGG
Equus_ferus_caballus_papillomavirus_type_7_complete_genome_JX035935.1	7619	2792	2926	NODE_2_length_7758_cov_5.722953	7340	7474	135	67.407	0.000427	GCAGAGGAGCCCTGGACAATGACTGACACCAGTCATGAAACCTTTTGTGCAGCACCAACAGAGACCTTTAAAAAAGAGGGCAGTGTGGTAACTGTGACATTTGATGGTGAAAGGGGGAATGACATGTGGTACACA
Equus_ferus_caballus_papillomavirus_type_7_complete_genome_NC_020501.1	7619	2792	2926	NODE_2_length_7758_cov_5.722953	7340	7474	135	67.407	0.000427	GCAGAGGAGCCCTGGACAATGACTGACACCAGTCATGAAACCTTTTGTGCAGCACCAACAGAGACCTTTAAAAAAGAGGGCAGTGTGGTAACTGTGACATTTGATGGTGAAAGGGGGAATGACATGTGGTACACA
Equine_papillomavirus_type_6_complete_genome_JQ965698.1	7551	3912	4030	NODE_2_length_7758_cov_5.722953	953	1071	121	69.421	0.000424	AGGGCGGCGGTAGAGGACCTTTACAAACAGTGCATAATGGGTGCTGAT--TGCCCGCCCGATGTGAGACCCCGAGTGGAAGGGGACACATTGGCTGACCGGATTTTGAAATGGGTCAGCTC
Equine_papillomavirus_type_6_complete_genome_NC_020500.1	7551	3912	4030	NODE_2_length_7758_cov_5.722953	953	1071	121	69.421	0.000424	AGGGCGGCGGTAGAGGACCTTTACAAACAGTGCATAATGGGTGCTGAT--TGCCCGCCCGATGTGAGACCCCGAGTGGAAGGGGACACATTGGCTGACCGGATTTTGAAATGGGTCAGCTC
Equine_papillomavirus_3_isolate_Haflinger_GU384895.1_complete_genome	7582	693	789	NODE_2_length_7758_cov_5.722953	5269	5371	106	69.811	0.001	GAGGATATAATGGA---CGCTGACCCAGGTACAAGCCCCGGGGAGGGGTGCAGCGGAGCATGCTTCATTTTAAGGGAGGCACAGTGCAGCGACCCTGATAGCGGGG
Equine_papillomavirus_3_complete_genome_NC_017862.1	7582	693	789	NODE_2_length_7758_cov_5.722953	5269	5371	106	69.811	0.001	GAGGATATAATGGA---CGCTGACCCAGGTACAAGCCCCGGGGAGGGGTGCAGCGGAGCATGCTTCATTTTAAGGGAGGCACAGTGCAGCGACCCTGATAGCGGGG
Equine_papillomavirus_3_isolate_Haflinger_GU384895.1_complete_genome	7582	6225	6329	NODE_4265_length_306_cov_1.082969	40	144	105	74.286	1.3e-10	GCCATATTGGCTGCAGCAGGCACAGGGCCGCAACAATGGTATTTGCTGGCGCAACCAGATATTTTTGACGGTTGCTGACAACACACACAACACAAACTTTACAAT
Equine_papillomavirus_3_complete_genome_NC_017862.1	7582	6225	6329	NODE_4265_length_306_cov_1.082969	40	144	105	74.286	1.3e-10	GCCATATTGGCTGCAGCAGGCACAGGGCCGCAACAATGGTATTTGCTGGCGCAACCAGATATTTTTGACGGTTGCTGACAACACACACAACACAAACTTTACAAT
Equus_caballus_papillomavirus_8_strain_NCSU_complete_genome_KU963288.1	8155	3779	3880	NODE_926_length_511_cov_0.958525	322	229	105	71.429	0.019	CAGTACCCGCTCCGGCAGCCCCAGTTCCG--CCT---CCTGCACCCCCATCACCA---CCTGCCCCCGCCGCCGCCTC---CCTCGCCCCAGCCCCAGCCCCAGT
Equus_caballus_papillomavirus_8_strain_NCSU_complete_genome_NC_031756.1	8155	3779	3880	NODE_926_length_511_cov_0.958525	322	229	105	71.429	0.019	CAGTACCCGCTCCGGCAGCCCCAGTTCCG--CCT---CCTGCACCCCCATCACCA---CCTGCCCCCGCCGCCGCCTC---CCTCGCCCCAGCCCCAGCCCCAGT
Equus_ferus_caballus_papillomavirus_type_5_complete_genome_JQ031033.1	7519	1212	1309	NODE_2_length_7758_cov_5.722953	5797	5894	99	73.737	8.14e-07	GCGGCTATGCTTGCGCGCTTTAAAGAAGCCTTTGAGGTCAGCTATACAGAACTCACCAGAGACTTTAAGAGTAATAAGACATG-TACTGGGGACTGGGT
Equus_ferus_caballus_papillomavirus_type_5_complete_genome_NC_020084.1	7519	1212	1309	NODE_2_length_7758_cov_5.722953	5797	5894	99	73.737	8.14e-07	GCGGCTATGCTTGCGCGCTTTAAAGAAGCCTTTGAGGTCAGCTATACAGAACTCACCAGAGACTTTAAGAGTAATAAGACATG-TACTGGGGACTGGGT
Equine_papillomavirus_type_6_complete_genome_JQ965698.1	7551	2494	2591	NODE_2_length_7758_cov_5.722953	7046	7137	98	69.388	0.005	TAGATCTCAGTGAACCAGAGGACGAAGG------GGAAGATGGAGAGGCTACGGAAAGCTTTAGATGCTGTTCTAGAAGAGCAGATGCTTCTCTATGA
Equine_papillomavirus_type_6_complete_genome_NC_020500.1	7551	2494	2591	NODE_2_length_7758_cov_5.722953	7046	7137	98	69.388	0.005	TAGATCTCAGTGAACCAGAGGACGAAGG------GGAAGATGGAGAGGCTACGGAAAGCTTTAGATGCTGTTCTAGAAGAGCAGATGCTTCTCTATGA
Equus_caballus_papillomavirus_8_strain_NCSU_complete_genome_KU963288.1	8155	7021	7106	NODE_4265_length_306_cov_1.082969	38	123	86	73.256	1.08e-05	CGGCCATATTGGCTGCAGCAGGCACAGGGCCGCAACAATGGTATTTGCTGGCGCAACCAGATATTTTTGACGGTTGCTGACAACAC
Equus_caballus_papillomavirus_8_strain_NCSU_complete_genome_NC_031756.1	8155	7021	7106	NODE_4265_length_306_cov_1.082969	38	123	86	73.256	1.08e-05	CGGCCATATTGGCTGCAGCAGGCACAGGGCCGCAACAATGGTATTTGCTGGCGCAACCAGATATTTTTGACGGTTGCTGACAACAC
Equus_ferus_caballus_papillomavirus_type_5_complete_genome_JQ031033.1	7519	614	682	NODE_2_length_7758_cov_5.722953	5232	5300	69	73.913	0.001	GACCTTGGCATAATCTGCCCCGCTTGCGCCACCACGCGAGGATATAATGGACGCTGACCCAGGTACAAG
Equus_ferus_caballus_papillomavirus_type_5_complete_genome_NC_020084.1	7519	614	682	NODE_2_length_7758_cov_5.722953	5232	5300	69	73.913	0.001	GACCTTGGCATAATCTGCCCCGCTTGCGCCACCACGCGAGGATATAATGGACGCTGACCCAGGTACAAG
Equus_caballus_papillomavirus_8_strain_NCSU_complete_genome_KU963288.1	8155	3817	3875	NODE_16916_length_231_cov_0.805195	226	169	60	75	0.83	GAGCCCCGGGCACCGCCG--GCCCCAGCCCCCGGGCCCGCCCGCGGCCCCCGCCCCCGCC
Equus_caballus_papillomavirus_8_strain_NCSU_complete_genome_NC_031756.1	8155	3817	3875	NODE_16916_length_231_cov_0.805195	226	169	60	75	0.83	GAGCCCCGGGCACCGCCG--GCCCCAGCCCCCGGGCCCGCCCGCGGCCCCCGCCCCCGCC
Equus_caballus_papillomavirus_8_strain_NCSU_complete_genome_KU963288.1	8155	3822	3875	NODE_2312_length_373_cov_0.837838	138	85	54	74.074	0.83	CCACCACCACCCGCAGGCGCCGCCGCCGCCGCCGCCGGCTCCCCAGCCCCAGCC
Equus_caballus_papillomavirus_8_strain_NCSU_complete_genome_NC_031756.1	8155	3822	3875	NODE_2312_length_373_cov_0.837838	138	85	54	74.074	0.83	CCACCACCACCCGCAGGCGCCGCCGCCGCCGCCGCCGGCTCCCCAGCCCCAGCC
Equus_caballus_papillomavirus_8_strain_NCSU_complete_genome_KU963288.1	8155	3826	3877	NODE_111_length_1587_cov_4.237086	403	353	53	84.906	3.08e-06	CCCCTGCCCCATCCC--GCCCGCACCCCCAGCCCCGGCCCCAGCCCCAGCCCC
Equus_caballus_papillomavirus_8_strain_NCSU_complete_genome_NC_031756.1	8155	3826	3877	NODE_111_length_1587_cov_4.237086	403	353	53	84.906	3.08e-06	CCCCTGCCCCATCCC--GCCCGCACCCCCAGCCCCGGCCCCAGCCCCAGCCCC
Equus_caballus_papillomavirus_8_strain_NCSU_complete_genome_KU963288.1	8155	3831	3882	NODE_926_length_511_cov_0.958525	248	197	52	75	0.83	GCCCCAGCCCCAGCCCCAGTGCCCGCTGCAGCCGCCGCCGCCTCCGCTGTCA
Equus_caballus_papillomavirus_8_strain_NCSU_complete_genome_NC_031756.1	8155	3831	3882	NODE_926_length_511_cov_0.958525	248	197	52	75	0.83	GCCCCAGCCCCAGCCCCAGTGCCCGCTGCAGCCGCCGCCGCCTCCGCTGTCA
Equus_caballus_papillomavirus_8_strain_NCSU_complete_genome_KU963288.1	8155	3813	3862	NODE_1253_length_457_cov_0.571053	230	180	51	76.471	0.83	GCCCGCGCCGCCGCCACCGCCCCCAGCCCCAGCCGCAACCGCAGCGAGAGC
Equus_caballus_papillomavirus_8_strain_NCSU_complete_genome_NC_031756.1	8155	3813	3862	NODE_1253_length_457_cov_0.571053	230	180	51	76.471	0.83	GCCCGCGCCGCCGCCACCGCCCCCAGCCCCAGCCGCAACCGCAGCGAGAGC
Equus_caballus_papillomavirus_8_strain_NCSU_complete_genome_KU963288.1	8155	3827	3876	NODE_3982_length_313_cov_1.313559	60	11	50	84	8.83e-07	CCGAGCCCGAGCCCGAGCCCGAGCCCGAGCCCGAGCCCGAGCCGCCGCCC
Equus_caballus_papillomavirus_8_strain_NCSU_complete_genome_KU963288.1	8155	3820	3868	NODE_111_length_1587_cov_4.237086	386	337	50	84	1.08e-05	CCGCACCCCCAGCCCCGGCCCCAGCCCCAGCCCCCACCGGCGGCCCCAGC
Equus_caballus_papillomavirus_8_strain_NCSU_complete_genome_NC_031756.1	8155	3827	3876	NODE_3982_length_313_cov_1.313559	60	11	50	84	8.83e-07	CCGAGCCCGAGCCCGAGCCCGAGCCCGAGCCCGAGCCCGAGCCGCCGCCC
Equus_caballus_papillomavirus_8_strain_NCSU_complete_genome_NC_031756.1	8155	3820	3868	NODE_111_length_1587_cov_4.237086	386	337	50	84	1.08e-05	CCGCACCCCCAGCCCCGGCCCCAGCCCCAGCCCCCACCGGCGGCCCCAGC
Equus_caballus_papillomavirus_1_strain_150904_complete_genome_MF288893.1	7613	5136	5184	NODE_2_length_7758_cov_5.722953	2377	2425	49	79.592	0.001	CTTTGACCTGCACCCCTCACTCCTGAGGCGCAAGAGGAAACGGAGGTAT
Equus_caballus_papillomavirus_1_isolate_G2_complete_genome_MN164462.1	7611	5136	5181	NODE_2_length_7758_cov_5.722953	2377	2425	49	77.551	0.22	CTTTGACCTGCACCCCTCACTCCTGAGGCGCAAGAGGAAACGGAGGTAT
Equus_caballus_papillomavirus_8_strain_NCSU_complete_genome_KU963288.1	8155	3832	3879	NODE_111_length_1587_cov_4.237086	403	357	49	83.673	0.000458	CCCCTGCCCCATCCC--GCCCGCACCCCCAGCCCCGGCCCCAGCCCCAG
Equus_caballus_papillomavirus_8_strain_NCSU_complete_genome_NC_031756.1	8155	3832	3879	NODE_111_length_1587_cov_4.237086	403	357	49	83.673	0.000458	CCCCTGCCCCATCCC--GCCCGCACCCCCAGCCCCGGCCCCAGCCCCAG
Equus_caballus_papillomavirus_2_isolate_XJ-ks1391_complete_genome_MW410986.1	7802	3006	3053	NODE_2_length_7758_cov_5.722953	7318	7365	48	77.083	0.23	AAGCCTGGCACAGTCCGCCTTTGCAGAGGAGCCCTGGACAATGACTGA
Equine_papillomavirus_2_isolate_Zurich_2009_HM461973.1_complete_genome	7803	3007	3054	NODE_2_length_7758_cov_5.722953	7318	7365	48	77.083	0.23	AAGCCTGGCACAGTCCGCCTTTGCAGAGGAGCCCTGGACAATGACTGA
Equine_papillomavirus_2_complete_genome_EU503122.1	7802	3006	3053	NODE_2_length_7758_cov_5.722953	7318	7365	48	77.083	0.23	AAGCCTGGCACAGTCCGCCTTTGCAGAGGAGCCCTGGACAATGACTGA
Equine_papillomavirus_2_complete_genome_NC_012123.1	7802	3006	3053	NODE_2_length_7758_cov_5.722953	7318	7365	48	77.083	0.23	AAGCCTGGCACAGTCCGCCTTTGCAGAGGAGCCCTGGACAATGACTGA
Equus_ferus_caballus_papillomavirus_type_7_complete_genome_JX035935.1	7619	789	834	NODE_2_length_7758_cov_5.722953	5340	5385	46	78.261	0.063	GGAGGCACAGTGCAGCGACCCTGATAGCGGGGATGATGAGGGAGAC
Equus_ferus_caballus_papillomavirus_type_7_complete_genome_NC_020501.1	7619	789	834	NODE_2_length_7758_cov_5.722953	5340	5385	46	78.261	0.063	GGAGGCACAGTGCAGCGACCCTGATAGCGGGGATGATGAGGGAGAC
Equus_caballus_papillomavirus_8_strain_NCSU_complete_genome_KU963288.1	8155	3677	3721	NODE_3982_length_313_cov_1.313559	60	16	45	84.444	3.76e-05	CCGAGCCCGAGCCCGAGCCCGAGCCCGAGCCCGAGCCCGAGCCGC
Equus_caballus_papillomavirus_8_strain_NCSU_complete_genome_NC_031756.1	8155	3677	3721	NODE_3982_length_313_cov_1.313559	60	16	45	84.444	3.76e-05	CCGAGCCCGAGCCCGAGCCCGAGCCCGAGCCCGAGCCCGAGCCGC
Equus_caballus_papillomavirus_2_isolate_XJ-ks1391_complete_genome_MW410986.1	7802	7559	7602	NODE_2_length_7758_cov_5.722953	4271	4314	44	77.273	0.79	TGCCCTGGAATGTGCAACCCTAGCGGTCTTCACCGGGTGCGGTG
Equine_papillomavirus_2_isolate_Zurich_2009_HM461973.1_complete_genome	7803	7560	7603	NODE_2_length_7758_cov_5.722953	4271	4314	44	77.273	0.79	TGCCCTGGAATGTGCAACCCTAGCGGTCTTCACCGGGTGCGGTG
Equine_papillomavirus_2_complete_genome_EU503122.1	7802	7559	7602	NODE_2_length_7758_cov_5.722953	4271	4314	44	77.273	0.79	TGCCCTGGAATGTGCAACCCTAGCGGTCTTCACCGGGTGCGGTG
Equine_papillomavirus_2_complete_genome_NC_012123.1	7802	7559	7602	NODE_2_length_7758_cov_5.722953	4271	4314	44	77.273	0.79	TGCCCTGGAATGTGCAACCCTAGCGGTCTTCACCGGGTGCGGTG
Equus_ferus_caballus_papillomavirus_type_4_complete_genome_NC_020085.1	7554	448	488	NODE_9529_length_252_cov_0.708571	78	36	43	79.07	0.77	CGACGGCGGATTCGGCACGACCGGCAGCACGTCCTCGAAGACC
Equus_ferus_caballus_papillomavirus_type_4_complete_genome_JQ031032.1	7554	448	488	NODE_9529_length_252_cov_0.708571	78	36	43	79.07	0.77	CGACGGCGGATTCGGCACGACCGGCAGCACGTCCTCGAAGACC
Equus_caballus_papillomavirus_8_strain_NCSU_complete_genome_KU963288.1	8155	3851	3893	NODE_3982_length_313_cov_1.313559	60	18	43	81.395	0.006	CCGAGCCCGAGCCCGAGCCCGAGCCCGAGCCCGAGCCCGAGCC
Equus_caballus_papillomavirus_8_strain_NCSU_complete_genome_KU963288.1	8155	3818	3859	NODE_111_length_1587_cov_4.237086	376	334	43	83.721	0.006	AGCCCCGGCCCCAGCCCCAGCCCCCACCGGCGGCCCCAGCTCG
Equus_caballus_papillomavirus_8_strain_NCSU_complete_genome_NC_031756.1	8155	3851	3893	NODE_3982_length_313_cov_1.313559	60	18	43	81.395	0.006	CCGAGCCCGAGCCCGAGCCCGAGCCCGAGCCCGAGCCCGAGCC
Equus_caballus_papillomavirus_8_strain_NCSU_complete_genome_NC_031756.1	8155	3818	3859	NODE_111_length_1587_cov_4.237086	376	334	43	83.721	0.006	AGCCCCGGCCCCAGCCCCAGCCCCCACCGGCGGCCCCAGCTCG
Equus_caballus_papillomavirus_8_strain_NCSU_complete_genome_KU963288.1	8155	3672	3713	NODE_3982_length_313_cov_1.313559	59	18	42	85.714	3.76e-05	CGAGCCCGAGCCCGAGCCCGAGCCCGAGCCCGAGCCCGAGCC
Equus_caballus_papillomavirus_8_strain_NCSU_complete_genome_KU963288.1	8155	3426	3467	NODE_11225_length_247_cov_0.729412	17	58	42	78.571	0.83	CACAAGGTCAGGGTGCCTGGGAGACGGAGAGATGGGGGAGGG
Equus_caballus_papillomavirus_8_strain_NCSU_complete_genome_NC_031756.1	8155	3672	3713	NODE_3982_length_313_cov_1.313559	59	18	42	85.714	3.76e-05	CGAGCCCGAGCCCGAGCCCGAGCCCGAGCCCGAGCCCGAGCC
Equus_caballus_papillomavirus_8_strain_NCSU_complete_genome_NC_031756.1	8155	3426	3467	NODE_11225_length_247_cov_0.729412	17	58	42	78.571	0.83	CACAAGGTCAGGGTGCCTGGGAGACGGAGAGATGGGGGAGGG
Equus_caballus_papillomavirus_8_strain_NCSU_complete_genome_KU963288.1	8155	3839	3879	NODE_3982_length_313_cov_1.313559	60	20	41	85.366	0.000131	CCGAGCCCGAGCCCGAGCCCGAGCCCGAGCCCGAGCCCGAG
Equus_caballus_papillomavirus_8_strain_NCSU_complete_genome_KU963288.1	8155	488	528	NODE_7369_length_258_cov_0.762431	89	129	41	80.488	0.068	GACGAGCAGCTGCCCCCGGAGCTGCAGGAGGAGGCGGCGGC
Equus_caballus_papillomavirus_8_strain_NCSU_complete_genome_NC_031756.1	8155	3839	3879	NODE_3982_length_313_cov_1.313559	60	20	41	85.366	0.000131	CCGAGCCCGAGCCCGAGCCCGAGCCCGAGCCCGAGCCCGAG
Equus_caballus_papillomavirus_8_strain_NCSU_complete_genome_NC_031756.1	8155	488	528	NODE_7369_length_258_cov_0.762431	89	129	41	80.488	0.068	GACGAGCAGCTGCCCCCGGAGCTGCAGGAGGAGGCGGCGGC
Equus_caballus_papillomavirus_8_strain_NCSU_complete_genome_KU963288.1	8155	3819	3857	NODE_926_length_511_cov_0.958525	248	210	39	82.051	0.068	GCCCCAGCCCCAGCCCCAGTGCCCGCTGCAGCCGCCGCC
Equus_caballus_papillomavirus_8_strain_NCSU_complete_genome_NC_031756.1	8155	3819	3857	NODE_926_length_511_cov_0.958525	248	210	39	82.051	0.068	GCCCCAGCCCCAGCCCCAGTGCCCGCTGCAGCCGCCGCC
Equus_caballus_papillomavirus_1_strain_150904_complete_genome_MF288893.1	7613	6580	6615	NODE_6202_length_267_cov_1.305263	195	158	38	81.579	0.77	TTGACCTTCCAGTTAGCCCTTCTCTTATGACCTTGACC
Equus_caballus_papillomavirus_1_isolate_G2_complete_genome_MN164462.1	7611	6577	6612	NODE_6202_length_267_cov_1.305263	195	158	38	81.579	0.77	TTGACCTTCCAGTTAGCCCTTCTCTTATGACCTTGACC
Equus_caballus_papillomavirus_type_1_complete_genome_AF498323.1	7610	6577	6612	NODE_6202_length_267_cov_1.305263	195	158	38	81.579	0.77	TTGACCTTCCAGTTAGCCCTTCTCTTATGACCTTGACC
Equus_caballus_papillomavirus_type_1_complete_genome_NC_003748.1	7610	6577	6612	NODE_6202_length_267_cov_1.305263	195	158	38	81.579	0.77	TTGACCTTCCAGTTAGCCCTTCTCTTATGACCTTGACC
Equus_caballus_papillomavirus_1_strain_150904_complete_genome_MF288893.1	7613	855	890	NODE_2_length_7758_cov_5.722953	5437	5472	36	83.333	0.063	CAGGGAAATTCCCTATCTCTATACCAGCAGCAGGAG
Equus_caballus_papillomavirus_type_1_complete_genome_AF498323.1	7610	855	890	NODE_2_length_7758_cov_5.722953	5437	5472	36	83.333	0.063	CAGGGAAATTCCCTATCTCTATACCAGCAGCAGGAG
Equus_caballus_papillomavirus_type_1_complete_genome_NC_003748.1	7610	855	890	NODE_2_length_7758_cov_5.722953	5437	5472	36	83.333	0.063	CAGGGAAATTCCCTATCTCTATACCAGCAGCAGGAG
Equus_caballus_papillomavirus_1_strain_150904_complete_genome_MF288893.1	7613	6361	6395	NODE_127_length_1480_cov_2.151818	71	40	35	82.857	0.77	TTGAACTTT---AGGTACAGCTGTCCCCTGAGAAC
Equus_caballus_papillomavirus_1_isolate_G2_complete_genome_MN164462.1	7611	6358	6392	NODE_127_length_1480_cov_2.151818	71	40	35	82.857	0.77	TTGAACTTT---AGGTACAGCTGTCCCCTGAGAAC
Equus_caballus_papillomavirus_type_1_complete_genome_AF498323.1	7610	6358	6392	NODE_127_length_1480_cov_2.151818	71	40	35	82.857	0.77	TTGAACTTT---AGGTACAGCTGTCCCCTGAGAAC
Equus_caballus_papillomavirus_type_1_complete_genome_NC_003748.1	7610	6358	6392	NODE_127_length_1480_cov_2.151818	71	40	35	82.857	0.77	TTGAACTTT---AGGTACAGCTGTCCCCTGAGAAC
Equine_papillomavirus_3_isolate_Haflinger_GU384895.1_complete_genome	7582	1671	1705	NODE_2_length_7758_cov_5.722953	6259	6293	35	94.286	8.21e-07	TCACAAATGGTGCAGTGGGCCTATGACAATAACTA
Equine_papillomavirus_3_isolate_Haflinger_GU384895.1_complete_genome	7582	3529	3563	NODE_2_length_7758_cov_5.722953	441	475	35	85.714	0.018	GGGAAGCCTAATCAGCTTAAATGTATGCGCTATCG
Equine_papillomavirus_3_complete_genome_NC_017862.1	7582	1671	1705	NODE_2_length_7758_cov_5.722953	6259	6293	35	94.286	8.21e-07	TCACAAATGGTGCAGTGGGCCTATGACAATAACTA
Equine_papillomavirus_3_complete_genome_NC_017862.1	7582	3529	3563	NODE_2_length_7758_cov_5.722953	441	475	35	85.714	0.018	GGGAAGCCTAATCAGCTTAAATGTATGCGCTATCG
Equus_caballus_papillomavirus_8_strain_NCSU_complete_genome_KU963288.1	8155	3819	3853	NODE_966_length_503_cov_13.727700	370	404	35	82.857	0.24	GCCGCAGCCCCCACCCCGCCCCCCGCCCCAGCCCC
Equus_caballus_papillomavirus_8_strain_NCSU_complete_genome_NC_031756.1	8155	3819	3853	NODE_966_length_503_cov_13.727700	370	404	35	82.857	0.24	GCCGCAGCCCCCACCCCGCCCCCCGCCCCAGCCCC
Equus_caballus_papillomavirus_8_strain_NCSU_complete_genome_KU963288.1	8155	3813	3846	NODE_762_length_550_cov_1.600423	364	331	34	82.353	0.83	GCCTAACACCTAGCCCTAGCCCCAGCCCTAGCCC
Equus_caballus_papillomavirus_8_strain_NCSU_complete_genome_NC_031756.1	8155	3813	3846	NODE_762_length_550_cov_1.600423	364	331	34	82.353	0.83	GCCTAACACCTAGCCCTAGCCCCAGCCCTAGCCC
Equus_caballus_papillomavirus_1_strain_150904_complete_genome_MF288893.1	7613	5695	5726	NODE_2_length_7758_cov_5.722953	2917	2948	32	84.375	0.77	TGGGCTGCACACCTGCAATAGGGGAGCACTGG
Equus_caballus_papillomavirus_1_isolate_G2_complete_genome_MN164462.1	7611	5692	5723	NODE_2_length_7758_cov_5.722953	2917	2948	32	84.375	0.77	TGGGCTGCACACCTGCAATAGGGGAGCACTGG
Equus_caballus_papillomavirus_type_1_complete_genome_AF498323.1	7610	5692	5723	NODE_2_length_7758_cov_5.722953	2917	2948	32	84.375	0.77	TGGGCTGCACACCTGCAATAGGGGAGCACTGG
Equus_caballus_papillomavirus_type_1_complete_genome_NC_003748.1	7610	5692	5723	NODE_2_length_7758_cov_5.722953	2917	2948	32	84.375	0.77	TGGGCTGCACACCTGCAATAGGGGAGCACTGG
Equus_ferus_caballus_papillomavirus_type_4_complete_genome_NC_020085.1	7554	4598	4627	NODE_1897_length_397_cov_0.881250	63	36	30	90	0.063	CGGGGGGCCGTGCAG--GGAGAGGCAGGGG
Equus_ferus_caballus_papillomavirus_type_4_complete_genome_JQ031032.1	7554	4598	4627	NODE_1897_length_397_cov_0.881250	63	36	30	90	0.063	CGGGGGGCCGTGCAG--GGAGAGGCAGGGG
Equus_caballus_papillomavirus_8_strain_NCSU_complete_genome_KU963288.1	8155	3837	3865	NODE_260_length_956_cov_1.089875	201	228	29	89.655	0.83	GCCTCAGCCCC-GCCCCGGCCCGAGCCCC
Equus_caballus_papillomavirus_8_strain_NCSU_complete_genome_KU963288.1	8155	6049	6077	NODE_9555_length_252_cov_0.708571	240	212	29	86.207	0.83	ACAATAAAAAAGAGAAAAAATATAAAGGT
Equus_caballus_papillomavirus_8_strain_NCSU_complete_genome_NC_031756.1	8155	3837	3865	NODE_260_length_956_cov_1.089875	201	228	29	89.655	0.83	GCCTCAGCCCC-GCCCCGGCCCGAGCCCC
Equus_caballus_papillomavirus_8_strain_NCSU_complete_genome_NC_031756.1	8155	6049	6077	NODE_9555_length_252_cov_0.708571	240	212	29	86.207	0.83	ACAATAAAAAAGAGAAAAAATATAAAGGT
Equus_caballus_papillomavirus_8_strain_NCSU_complete_genome_KU963288.1	8155	3307	3334	NODE_15225_length_236_cov_0.779874	55	28	28	89.286	0.24	CCGTGGGACCCCCAGCCCCGCGCCGACG
Equus_caballus_papillomavirus_8_strain_NCSU_complete_genome_NC_031756.1	8155	3307	3334	NODE_15225_length_236_cov_0.779874	55	28	28	89.286	0.24	CCGTGGGACCCCCAGCCCCGCGCCGACG
Equus_caballus_papillomavirus_2_isolate_XJ-ks1391_complete_genome_MW410986.1	7802	3354	3380	NODE_2_length_7758_cov_5.722953	11	37	27	88.889	0.79	TCCTCTTGTCACCAGCACCACCGGAGA
Equus_caballus_papillomavirus_2_isolate_XJ-ks1391_complete_genome_MW410986.1	7802	3354	3380	NODE_2_length_7758_cov_5.722953	7666	7692	27	88.889	0.79	TCCTCTTGTCACCAGCACCACCGGAGA
Equine_papillomavirus_2_isolate_Zurich_2009_HM461973.1_complete_genome	7803	3355	3381	NODE_2_length_7758_cov_5.722953	11	37	27	88.889	0.79	TCCTCTTGTCACCAGCACCACCGGAGA
Equine_papillomavirus_2_isolate_Zurich_2009_HM461973.1_complete_genome	7803	3355	3381	NODE_2_length_7758_cov_5.722953	7666	7692	27	88.889	0.79	TCCTCTTGTCACCAGCACCACCGGAGA
Equine_papillomavirus_2_complete_genome_EU503122.1	7802	3354	3380	NODE_2_length_7758_cov_5.722953	11	37	27	88.889	0.79	TCCTCTTGTCACCAGCACCACCGGAGA
Equine_papillomavirus_2_complete_genome_EU503122.1	7802	3354	3380	NODE_2_length_7758_cov_5.722953	7666	7692	27	88.889	0.79	TCCTCTTGTCACCAGCACCACCGGAGA
Equine_papillomavirus_2_complete_genome_NC_012123.1	7802	3354	3380	NODE_2_length_7758_cov_5.722953	11	37	27	88.889	0.79	TCCTCTTGTCACCAGCACCACCGGAGA
Equine_papillomavirus_2_complete_genome_NC_012123.1	7802	3354	3380	NODE_2_length_7758_cov_5.722953	7666	7692	27	88.889	0.79	TCCTCTTGTCACCAGCACCACCGGAGA
Equus_ferus_caballus_papillomavirus_type_4_complete_genome_NC_020085.1	7554	2632	2657	NODE_2330_length_372_cov_0.762712	149	175	27	92.593	0.22	GGCCACATGCCCTTTCCCCAGCTTGGT
Equus_ferus_caballus_papillomavirus_type_4_complete_genome_NC_020085.1	7554	3220	3246	NODE_567_length_633_cov_0.892086	299	325	27	88.889	0.77	GGGCGACGTGTGGCTGCGCGGGGGCGG
Equus_ferus_caballus_papillomavirus_type_4_complete_genome_JQ031032.1	7554	2632	2657	NODE_2330_length_372_cov_0.762712	149	175	27	92.593	0.22	GGCCACATGCCCTTTCCCCAGCTTGGT
Equus_ferus_caballus_papillomavirus_type_4_complete_genome_JQ031032.1	7554	3220	3246	NODE_567_length_633_cov_0.892086	299	325	27	88.889	0.77	GGGCGACGTGTGGCTGCGCGGGGGCGG
Equine_papillomavirus_type_6_complete_genome_JQ965698.1	7551	5397	5423	NODE_17296_length_230_cov_0.810458	172	198	27	88.889	0.77	CACGGACGAATCCGTGACGCTGTCCGA
Equine_papillomavirus_type_6_complete_genome_NC_020500.1	7551	5397	5423	NODE_17296_length_230_cov_0.810458	172	198	27	88.889	0.77	CACGGACGAATCCGTGACGCTGTCCGA
Equus_caballus_papillomavirus_8_strain_NCSU_complete_genome_KU963288.1	8155	3677	3703	NODE_2949_length_345_cov_1.619403	83	58	27	92.593	0.24	CCGAGCCTGAGCCCGA-CCCGGACCCC
Equus_caballus_papillomavirus_8_strain_NCSU_complete_genome_KU963288.1	8155	3844	3870	NODE_2312_length_373_cov_0.837838	98	72	27	88.889	0.83	CCCCAGCCCCAGCCGGCGCCGCAGCCC
Equus_caballus_papillomavirus_8_strain_NCSU_complete_genome_NC_031756.1	8155	3677	3703	NODE_2949_length_345_cov_1.619403	83	58	27	92.593	0.24	CCGAGCCTGAGCCCGA-CCCGGACCCC
Equus_caballus_papillomavirus_8_strain_NCSU_complete_genome_NC_031756.1	8155	3844	3870	NODE_2312_length_373_cov_0.837838	98	72	27	88.889	0.83	CCCCAGCCCCAGCCGGCGCCGCAGCCC
Equus_caballus_papillomavirus_8_strain_NCSU_complete_genome_KU963288.1	8155	5582	5607	NODE_12150_length_245_cov_0.738095	147	123	26	92.308	0.83	GGGGCGCG-GGGTCAGCGCGGGCCGC
Equus_caballus_papillomavirus_8_strain_NCSU_complete_genome_NC_031756.1	8155	5582	5607	NODE_12150_length_245_cov_0.738095	147	123	26	92.308	0.83	GGGGCGCG-GGGTCAGCGCGGGCCGC
Equus_caballus_papillomavirus_9_strain_complete_genome_SW_MN117918.1	7656	4648	4672	NODE_17479_length_229_cov_2.440789	52	77	26	92.308	0.78	CAAAGTGCGCGCCGCAGGGCGGCGGT
Equus_caballus_papillomavirus_8_strain_NCSU_complete_genome_KU963288.1	8155	4380	4404	NODE_5822_length_273_cov_0.520408	142	166	25	92	0.24	AGCAGTCGCTCGGGGAGGACGTGGA
Equus_caballus_papillomavirus_8_strain_NCSU_complete_genome_NC_031756.1	8155	4380	4404	NODE_5822_length_273_cov_0.520408	142	166	25	92	0.24	AGCAGTCGCTCGGGGAGGACGTGGA
Equus_ferus_caballus_papillomavirus_type_4_complete_genome_NC_020085.1	7554	462	483	NODE_4515_length_300_cov_1.434978	226	205	22	95.455	0.77	ACGACGAGCACCCTGTCCTCGA
Equus_ferus_caballus_papillomavirus_type_4_complete_genome_JQ031032.1	7554	462	483	NODE_4515_length_300_cov_1.434978	226	205	22	95.455	0.77	ACGACGAGCACCCTGTCCTCGA
Equus_ferus_caballus_papillomavirus_type_5_complete_genome_JQ031033.1	7519	5791	5812	NODE_8245_length_255_cov_0.696629	88	67	22	95.455	0.76	AGAATCTCAAAAGGGCTCAGGA
Equus_ferus_caballus_papillomavirus_type_5_complete_genome_NC_020084.1	7519	5791	5812	NODE_8245_length_255_cov_0.696629	88	67	22	95.455	0.76	AGAATCTCAAAAGGGCTCAGGA
Equus_ferus_caballus_papillomavirus_type_7_complete_genome_JX035935.1	7619	138	159	NODE_2133_length_382_cov_0.813115	52	31	22	95.455	0.77	GGCACTTAGAGACAATCAGTGG
Equus_ferus_caballus_papillomavirus_type_7_complete_genome_NC_020501.1	7619	138	159	NODE_2133_length_382_cov_0.813115	52	31	22	95.455	0.77	GGCACTTAGAGACAATCAGTGG
Equus_caballus_papillomavirus_9_strain_complete_genome_SW_MN117918.1	7656	5366	5385	NODE_280_length_910_cov_10.190876	597	616	20	100	0.22	GCGCGCAGCCGGGCCTCGGC
Equus_caballus_papillomavirus_2_isolate_XJ-ks1391_complete_genome_MW410986.1	7802	4904	4922	NODE_1287_length_452_cov_1.613333	422	404	19	100	0.79	GCTGCGCGTGCGCCGGCGC
Equine_papillomavirus_2_isolate_Zurich_2009_HM461973.1_complete_genome	7803	4905	4923	NODE_1287_length_452_cov_1.613333	422	404	19	100	0.79	GCTGCGCGTGCGCCGGCGC
Equine_papillomavirus_2_complete_genome_EU503122.1	7802	4904	4922	NODE_1287_length_452_cov_1.613333	422	404	19	100	0.79	GCTGCGCGTGCGCCGGCGC
Equine_papillomavirus_2_complete_genome_NC_012123.1	7802	4904	4922	NODE_1287_length_452_cov_1.613333	422	404	19	100	0.79	GCTGCGCGTGCGCCGGCGC
Equine_papillomavirus_type_6_complete_genome_JQ965698.1	7551	5077	5095	NODE_91_length_1707_cov_3.204294	283	265	19	100	0.77	CTGAGGGCAATGGGGAGCT
Equine_papillomavirus_type_6_complete_genome_NC_020500.1	7551	5077	5095	NODE_91_length_1707_cov_3.204294	283	265	19	100	0.77	CTGAGGGCAATGGGGAGCT
Equus_caballus_papillomavirus_8_strain_NCSU_complete_genome_KU963288.1	8155	3312	3330	NODE_1276_length_453_cov_1.454787	266	284	19	100	0.83	GGACCCACAGCCCCTCGTC
Equus_caballus_papillomavirus_8_strain_NCSU_complete_genome_NC_031756.1	8155	3312	3330	NODE_1276_length_453_cov_1.454787	266	284	19	100	0.83	GGACCCACAGCCCCTCGTC

## Sheet: ID2396_14-14
qseq ID	qlen	qstart	qend	subject ID	sstart	send	len	pident	evalue	seq
Equus_caballus_papillomavirus_9_strain_complete_genome_SW_MN117918.1	7656	407	2674	NODE_43_length_2268_cov_2.465997	2268	1	2268	100	0	TAATTATACCTTTGGCGTCCTCCTCCAACCAGGTTAGGAAACCTCTGTTTAAAATTTAACAGGGCGCCAACCGTTAGCGGTGCAATTCTGCTGTGTCAGGCTTTTGACCAATCCTGAAAATGTAAAACTTCCTTGTGCAAAGACCGCTCGCGGTACAGTGCTCTTTTGCTAGATAGATCATTGTTAACAACAATCAGTGGGTATTACAAGTTGGCAGCATCGCCTGCGTCACAGCACATACTAATATGCGCGGGCCAGTGGACACACTTGCCAGATGGACCCGGACATAGAAGGTTTGAAGTGCCTCTTCTGCAAAAGAAGATGTGGAAAGGTGGACGCACTGTGGTGGGATGGAGGTGATTTCAAACTGCAGTGGCGGCCCGGAGGACCCTACGCAAG…
Equus_caballus_papillomavirus_9_strain_complete_genome_SW_MN117918.1	7656	2880	4354	NODE_98_length_1475_cov_1.992132	1	1475	1475	100	0	TGGACCTTAAGCACAGAGCACCCTTGCAGTTGAGGTGCCCCCCCATACTAGTCACCTCAAACATAGATGTGCGGAGGCAGGACAAATATCGGTACCTATACAGCAGGATGGCCTGCTTCACCTTTGACAACCCCTATCCCCTGGATGAAAATGGAGAACCTGTATTTCCCCTAACTGTTGAACATTGGGCCTCTTTCTTTACAAGGTGGTGGAAACGCCTAGATCTCAGTGAACCAGAGGACGAAGGGGAAGATGGAGAGGCTACGGAAAGCTTTAGATGCTGTTCTAGAAGAGCAGATGCTTCTCTATGAGGGGGGCAGCACATGCATCTTTGAACAGGTCAAATTCTGGCAGACTATGCGAAGGGAAAACTGCCTGTACCATGCATGTAGGCAGAAA…
Equine_papillomavirus_2_isolate_Zurich_2009_HM461973.1_complete_genome	7803	951	2287	NODE_43_length_2268_cov_2.465997	1342	24	1365	63.956	6.79e-38	GGACGCTGACCCAGGTACAAGCCCCGGGGAGGGGTGCAGCGGAGCATGCTTCATTTTA---AGGGAGGCACAGTGCAGCGACCCTGATAGCGGGGATGA-TGAGGGAGACACCCCAGACAG--TCCAGGTGCCTATGATTTTGTAGATAACGCCTTTGTGAAGCAGGGAAATTCCCTATCTCTATACCAGCAGCAGGAGAATGCGGAGGCCGTGCTGCGGTTGCAGCAATTAAAAAGAAAGCTATTAGGTGCCAGCCCAAAAGAGAAAGGGCACAATCTTAATGAGGTCCTGCCCG-AGCT--TAGTATTTCGCC---CATCAG----CCCACAAGTGAAGAGACGCCTGTTCGAGCCCCCTGCA---GACAACCTCAGGGGCTCCTG----CAGCTAT…
Equus_caballus_papillomavirus_9_strain_complete_genome_SW_MN117918.1	7656	4559	5779	NODE_142_length_1221_cov_1.395979	1	1221	1222	99.673	0	CAGGTACCTCTTGGTCCGTTATTTGTGGCGCCAAATTCAAACCGAAAG-AAAAAAAAAAAAAAAGGTTAAACAGACATGGCGCTGCCTGCAAAGCGCCGCCGCAGGGCGGCGGTAGAGGACCTTTACAAACAGTGCATAATGGGTGCTGATTGCCCGCCCGATGTGAGACCCCGAGTGGAAGGGGACACATTGGCTGACCGGATTTTGAAATGGGTCAGCTCATTTCTGTATTTGGGCAATTTAGGCATCAGCACCGGACGCGGTGGCACAGGAGGCACACTTGGATACCGGCCTTTGGGACGAGGCGTTGCAAGTGAAGGGGGGGGGGAGTGTCCGCGTTGGCACCCCCGTTTCTGCGATTGAGCCTGGCCTGGCGCCAGGCACGGTGGGCCCCTCAG…
Equus_caballus_papillomavirus_2_isolate_XJ-ks1391_complete_genome_MW410986.1	7802	1263	2286	NODE_43_length_2268_cov_2.465997	1029	24	1036	64.575	5.57e-39	CCACAAGTGAAGAGACGCCTGTTCGAGCCCCCTGCAGAC---AACCTCAGGGGCTCCTGC----AGCTATGAAGCTAATTCTGTTTACATCAGGACGAGCACGCAGGTAGGG---------GGTGTGGAGGGTGAGCG--TCCGGCACTGCGGGAGATTCAAAATG-GCCAGACACCCATTC-GGC-CGCCGGTCTTGGACGTACTCCAAGCTGGTAACAGGCAGGCGGCTATGCTTGCGCGCTTTAAAGAAGCCT---TTGAGGTCAGCTATACAGAACTCACCAGAGACTTTAAGAGTAATAAGACATGTACTGGGGACTGGGTAGCACTTGTATACAGTGTGCGTGAGGCGCACTATGAAAGTGCCAAGGAGCTGCTACAGCAGCATTGCGACTAT…
Equine_papillomavirus_2_complete_genome_EU503122.1	7802	1263	2286	NODE_43_length_2268_cov_2.465997	1029	24	1036	64.575	5.57e-39	CCACAAGTGAAGAGACGCCTGTTCGAGCCCCCTGCAGAC---AACCTCAGGGGCTCCTGC----AGCTATGAAGCTAATTCTGTTTACATCAGGACGAGCACGCAGGTAGGG---------GGTGTGGAGGGTGAGCG--TCCGGCACTGCGGGAGATTCAAAATG-GCCAGACACCCATTC-GGC-CGCCGGTCTTGGACGTACTCCAAGCTGGTAACAGGCAGGCGGCTATGCTTGCGCGCTTTAAAGAAGCCT---TTGAGGTCAGCTATACAGAACTCACCAGAGACTTTAAGAGTAATAAGACATGTACTGGGGACTGGGTAGCACTTGTATACAGTGTGCGTGAGGCGCACTATGAAAGTGCCAAGGAGCTGCTACAGCAGCATTGCGACTAT…
Equine_papillomavirus_2_complete_genome_NC_012123.1	7802	1263	2286	NODE_43_length_2268_cov_2.465997	1029	24	1036	64.575	5.57e-39	CCACAAGTGAAGAGACGCCTGTTCGAGCCCCCTGCAGAC---AACCTCAGGGGCTCCTGC----AGCTATGAAGCTAATTCTGTTTACATCAGGACGAGCACGCAGGTAGGG---------GGTGTGGAGGGTGAGCG--TCCGGCACTGCGGGAGATTCAAAATG-GCCAGACACCCATTC-GGC-CGCCGGTCTTGGACGTACTCCAAGCTGGTAACAGGCAGGCGGCTATGCTTGCGCGCTTTAAAGAAGCCT---TTGAGGTCAGCTATACAGAACTCACCAGAGACTTTAAGAGTAATAAGACATGTACTGGGGACTGGGTAGCACTTGTATACAGTGTGCGTGAGGCGCACTATGAAAGTGCCAAGGAGCTGCTACAGCAGCATTGCGACTAT…
Equus_caballus_papillomavirus_9_strain_complete_genome_SW_MN117918.1	7656	6545	7454	NODE_247_length_910_cov_2.121248	910	1	910	100	0	GTAAGGCACAGGACAACGGGGCAGATAATGACAAGCGTGTCAATATAGCTTTTGATGTCAAGCAAAGCCAGGTTCTTATTGTGGGCTGCACACCTGCAATAGGGGAGCACTGGAAGTTGGCTAAGGCCTGTGGTGGTGTTCCTGCAGACAACTGCCCTCCTTTAGAGCTAGTAAAGACACAGATTGAGGATGGGGACATGGGCGAGGTGGGCTTTGGTGCAATGGATTTTAAAGCCTTGCAGGCCAGCAGGTCTGAGGTGCCCCTGGACCTGGTGGACACTACCTCCAAGTACCCTGACTACATACAAATGGGCCAGGAGACATCTGGAAACAGCATGTTTTTCTTTGCTCGCAGAGAGCAGATGTACACAAGGCATTTTATGGTTAGGGATGGGCTTT…
Equus_caballus_papillomavirus_2_isolate_XJ-ks1391_complete_genome_MW410986.1	7802	6099	6956	NODE_247_length_910_cov_2.121248	881	24	872	71.789	4.56e-116	GACAAGCGTGTCAATATAGCTTTTGATGTCAAGCAAAGCCAGGTTCTTATTGTGGGCTGCACACCTGCAATAGGGGAGCACTGGAAGTTGGCTAAGGCC-TG---TGGTGGTGTTCCTGCAGACAACTGCCCTCCTTTAGAGCTAGTAAAGACACAGATTGAGGATGGGGACATGGGCGAGGTGGGCTTTGGTGCAATGGATTTTAAAG-CCT-TGCAGGCCAGCAGGTCTGAGGTGCCCCTGGACCTGGTGGACACTACCTCCAAGTACCCTGACTACATACAAATGGGCCAGGAGACATCTGGAAACAGCATGTTTTTCTTTGCTCGCAGAGAGCAGATGTACACAAGGCATTTTATGGTTAGGGATGGGCTTTTAGAAAATGAAAAGGTACCC-AA…
Equine_papillomavirus_2_isolate_Zurich_2009_HM461973.1_complete_genome	7803	6100	6957	NODE_247_length_910_cov_2.121248	881	24	872	71.904	3.74e-117	GACAAGCGTGTCAATATAGCTTTTGATGTCAAGCAAAGCCAGGTTCTTATTGTGGGCTGCACACCTGCAATAGGGGAGCACTGGAAGTTGGCTAAGGCC-TG---TGGTGGTGTTCCTGCAGACAACTGCCCTCCTTTAGAGCTAGTAAAGACACAGATTGAGGATGGGGACATGGGCGAGGTGGGCTTTGGTGCAATGGATTTTAAAG-CCT-TGCAGGCCAGCAGGTCTGAGGTGCCCCTGGACCTGGTGGACACTACCTCCAAGTACCCTGACTACATACAAATGGGCCAGGAGACATCTGGAAACAGCATGTTTTTCTTTGCTCGCAGAGAGCAGATGTACACAAGGCATTTTATGGTTAGGGATGGGCTTTTAGAAAATGAAAAGGTACCC-AA…
Equine_papillomavirus_2_complete_genome_EU503122.1	7802	6099	6956	NODE_247_length_910_cov_2.121248	881	24	872	71.789	4.56e-116	GACAAGCGTGTCAATATAGCTTTTGATGTCAAGCAAAGCCAGGTTCTTATTGTGGGCTGCACACCTGCAATAGGGGAGCACTGGAAGTTGGCTAAGGCC-TG---TGGTGGTGTTCCTGCAGACAACTGCCCTCCTTTAGAGCTAGTAAAGACACAGATTGAGGATGGGGACATGGGCGAGGTGGGCTTTGGTGCAATGGATTTTAAAG-CCT-TGCAGGCCAGCAGGTCTGAGGTGCCCCTGGACCTGGTGGACACTACCTCCAAGTACCCTGACTACATACAAATGGGCCAGGAGACATCTGGAAACAGCATGTTTTTCTTTGCTCGCAGAGAGCAGATGTACACAAGGCATTTTATGGTTAGGGATGGGCTTTTAGAAAATGAAAAGGTACCC-AA…
Equine_papillomavirus_2_complete_genome_NC_012123.1	7802	6099	6956	NODE_247_length_910_cov_2.121248	881	24	872	71.789	4.56e-116	GACAAGCGTGTCAATATAGCTTTTGATGTCAAGCAAAGCCAGGTTCTTATTGTGGGCTGCACACCTGCAATAGGGGAGCACTGGAAGTTGGCTAAGGCC-TG---TGGTGGTGTTCCTGCAGACAACTGCCCTCCTTTAGAGCTAGTAAAGACACAGATTGAGGATGGGGACATGGGCGAGGTGGGCTTTGGTGCAATGGATTTTAAAG-CCT-TGCAGGCCAGCAGGTCTGAGGTGCCCCTGGACCTGGTGGACACTACCTCCAAGTACCCTGACTACATACAAATGGGCCAGGAGACATCTGGAAACAGCATGTTTTTCTTTGCTCGCAGAGAGCAGATGTACACAAGGCATTTTATGGTTAGGGATGGGCTTTTAGAAAATGAAAAGGTACCC-AA…
Equus_caballus_papillomavirus_2_isolate_XJ-ks1391_complete_genome_MW410986.1	7802	4182	4976	NODE_142_length_1221_cov_1.395979	80	875	807	66.295	2.37e-56	CGCTGCCTGCAAAGCGCCGCCGCAGGGCGGCGGTAGAGGACCTTTACAAACAGTGCATAATGGGTGCTGATTGCCCGCCCGATGTGAGACCCCGAGTGGAAGGGGACACATTGGCTGACCGGATTTTGAAATGGGTCAGCTCATTTCTGTATTTGGGCAATTTAGGCATCAGCACCGGACGCGGTGGCACAGGAGGCACACTTGGATACCGGCCTTTGGGACGAGGCGTTGCAAGTGAAGGGGGGGGGGAGTGTCCGCGTTGGCACCCCCGTTTCTGCGATTGAGCCTGGCCTGGCGCCAGGCACGGTGGGCCCCTCAGAGATAGTTCCTGTGGACACATTGCTTCCTACCACCCCCTCTGTGGTTCCTGTTGGGGAGGGGGAGGC---GGGGTTCATT…
Equine_papillomavirus_2_isolate_Zurich_2009_HM461973.1_complete_genome	7803	4183	4977	NODE_142_length_1221_cov_1.395979	80	875	807	66.171	1.23e-53	CGCTGCCTGCAAAGCGCCGCCGCAGGGCGGCGGTAGAGGACCTTTACAAACAGTGCATAATGGGTGCTGATTGCCCGCCCGATGTGAGACCCCGAGTGGAAGGGGACACATTGGCTGACCGGATTTTGAAATGGGTCAGCTCATTTCTGTATTTGGGCAATTTAGGCATCAGCACCGGACGCGGTGGCACAGGAGGCACACTTGGATACCGGCCTTTGGGACGAGGCGTTGCAAGTGAAGGGGGGGGGGAGTGTCCGCGTTGGCACCCCCGTTTCTGCGATTGAGCCTGGCCTGGCGCCAGGCACGGTGGGCCCCTCAGAGATAGTTCCTGTGGACACATTGCTTCCTACCACCCCCTCTGTGGTTCCTGTTGGGGAGGGGGAGGC---GGGGTTCATT…
Equine_papillomavirus_2_complete_genome_EU503122.1	7802	4182	4976	NODE_142_length_1221_cov_1.395979	80	875	807	66.419	1.94e-57	CGCTGCCTGCAAAGCGCCGCCGCAGGGCGGCGGTAGAGGACCTTTACAAACAGTGCATAATGGGTGCTGATTGCCCGCCCGATGTGAGACCCCGAGTGGAAGGGGACACATTGGCTGACCGGATTTTGAAATGGGTCAGCTCATTTCTGTATTTGGGCAATTTAGGCATCAGCACCGGACGCGGTGGCACAGGAGGCACACTTGGATACCGGCCTTTGGGACGAGGCGTTGCAAGTGAAGGGGGGGGGGAGTGTCCGCGTTGGCACCCCCGTTTCTGCGATTGAGCCTGGCCTGGCGCCAGGCACGGTGGGCCCCTCAGAGATAGTTCCTGTGGACACATTGCTTCCTACCACCCCCTCTGTGGTTCCTGTTGGGGAGGGGGAGGC---GGGGTTCATT…
Equine_papillomavirus_2_complete_genome_NC_012123.1	7802	4182	4976	NODE_142_length_1221_cov_1.395979	80	875	807	66.419	1.94e-57	CGCTGCCTGCAAAGCGCCGCCGCAGGGCGGCGGTAGAGGACCTTTACAAACAGTGCATAATGGGTGCTGATTGCCCGCCCGATGTGAGACCCCGAGTGGAAGGGGACACATTGGCTGACCGGATTTTGAAATGGGTCAGCTCATTTCTGTATTTGGGCAATTTAGGCATCAGCACCGGACGCGGTGGCACAGGAGGCACACTTGGATACCGGCCTTTGGGACGAGGCGTTGCAAGTGAAGGGGGGGGGGAGTGTCCGCGTTGGCACCCCCGTTTCTGCGATTGAGCCTGGCCTGGCGCCAGGCACGGTGGGCCCCTCAGAGATAGTTCCTGTGGACACATTGCTTCCTACCACCCCCTCTGTGGTTCCTGTTGGGGAGGGGGAGGC---GGGGTTCATT…
Equine_papillomavirus_type_6_complete_genome_JQ965698.1	7551	5788	6547	NODE_247_length_910_cov_2.121248	851	80	793	65.826	1.27e-40	AAGCAAAGCCAGGTTCTTATTGTGGGCTGCACACCTGCAATAGGGGAGCACTGGAAGTTGGCTAAGGCCTGTGGTGGTGTTCCTGCAG-----ACAACT----GCCCTCCTTTAGAGCTAGTAAAGACAC-AGATTGAGGATGGGGACATGGGCGAGGTGGGCTTTGGTGCAATGGATTTTAAAGCCTTGCAGGCCAGCAGGTCTGAGGTGCCCCTGGACCTGGTGGACACTACCTCCAAGTACCCTGACTACATACAAATGGGCCAGGAGACATCTGGAAACAGCATGTTTTTCTTTGCTCG--CAGAGAGCAGATGTACACAAGGCATTTTATGGTTAGGGATGGGCTTTTAGAAAATGAAAAGG---TACCCAAGGAGATGTA-TGTTGCCCGTGC…
Equine_papillomavirus_type_6_complete_genome_NC_020500.1	7551	5788	6547	NODE_247_length_910_cov_2.121248	851	80	793	65.826	1.27e-40	AAGCAAAGCCAGGTTCTTATTGTGGGCTGCACACCTGCAATAGGGGAGCACTGGAAGTTGGCTAAGGCCTGTGGTGGTGTTCCTGCAG-----ACAACT----GCCCTCCTTTAGAGCTAGTAAAGACAC-AGATTGAGGATGGGGACATGGGCGAGGTGGGCTTTGGTGCAATGGATTTTAAAGCCTTGCAGGCCAGCAGGTCTGAGGTGCCCCTGGACCTGGTGGACACTACCTCCAAGTACCCTGACTACATACAAATGGGCCAGGAGACATCTGGAAACAGCATGTTTTTCTTTGCTCG--CAGAGAGCAGATGTACACAAGGCATTTTATGGTTAGGGATGGGCTTTTAGAAAATGAAAAGG---TACCCAAGGAGATGTA-TGTTGCCCGTGC…
Equus_caballus_papillomavirus_9_strain_complete_genome_SW_MN117918.1	7656	5765	6554	NODE_320_length_790_cov_1.193548	790	1	790	99.747	0	GTCCGGTGTTTCCGAAACCGGCACTGGGTTTGTGGACATTGATCTGGAGAGTGTTGGAAGTGTCGTCAGTGACCGTGTACTTTTGGAGGATGACACACCAAGCATCAGGGGGGTTTTGGTTGTAGGGCGTGGTGGGGGTACTGTCCGCGCAGTGTCACTTCCTGATAGCAGCTTTCAGCGCGTGTTTTACAGCGCGCTAGCCCCCTATGGTCCCGCCATGGGGGCCTCTACCCCTGCACACGCGGGTGGCTCAGTGGTCATCTCGGGGGAGGGTGCGGAGCATCCCTCTGTTCTAGTCTATGGGTTTTCTATCAGTGGCACCTTTGACCTGCACCCCTCACTCCTGAGGCGCAAGAGGAAACGGAGGTATGCTTCCTGTTTTCCAGATGGCATTGTGGA…
Equus_ferus_caballus_papillomavirus_type_7_complete_genome_JX035935.1	7619	5964	6562	NODE_247_length_910_cov_2.121248	701	88	622	67.685	9.21e-49	GGCTTTGGTGCAATGGATTTTAAAGCCTTGCAGGCCAGCAGGTCTGAGGTGCCCCTGGACCTGGTGGACACTACCTCCAAGTACCCTGACTACATACAAATGGGCCAGGAGACATCTGGAAACAGCATGTTTTTCTTTGCTCGCAGAGAGCAGATGTACACAAGGCATTTTATGGTTAGGGATGGGCTTTTAGAAAATGAAAAGGTACCCAAGGAGATGTATGTTGCCCGTGCACAGGAT----GATGACAAGAAAT-CCCACAGGTATCAGTACACACACACACCCAGTGGGTCTCTGGTGTCCACTGATTCTCAGATTTTTAACAGGCCCTACTGGCTGCAGCGCGCACAGGGCCTAAATAATGGCGTCTGCTGGCATGACAAGCTTTATGTTACAG…
Equus_ferus_caballus_papillomavirus_type_7_complete_genome_NC_020501.1	7619	5964	6562	NODE_247_length_910_cov_2.121248	701	88	622	67.685	9.21e-49	GGCTTTGGTGCAATGGATTTTAAAGCCTTGCAGGCCAGCAGGTCTGAGGTGCCCCTGGACCTGGTGGACACTACCTCCAAGTACCCTGACTACATACAAATGGGCCAGGAGACATCTGGAAACAGCATGTTTTTCTTTGCTCGCAGAGAGCAGATGTACACAAGGCATTTTATGGTTAGGGATGGGCTTTTAGAAAATGAAAAGGTACCCAAGGAGATGTATGTTGCCCGTGCACAGGAT----GATGACAAGAAAT-CCCACAGGTATCAGTACACACACACACCCAGTGGGTCTCTGGTGTCCACTGATTCTCAGATTTTTAACAGGCCCTACTGGCTGCAGCGCGCACAGGGCCTAAATAATGGCGTCTGCTGGCATGACAAGCTTTATGTTACAG…
Equus_caballus_papillomavirus_9_strain_complete_genome_SW_MN117918.1	7656	1	406	NODE_1272_length_428_cov_2.116809	406	1	406	100	0	CCCCTTCCTGAAATATTTTTTTTTACATACCCCAATAAAGATGTATTATTCAGTTATGTGTCATGGTGTTTCATTGCACCGCGCCCGGTTCTGGCATTCAAACCCACCCTCTGAGCGCTGCTGGTACAGGTATAAGACCGCACCTGGTGTCAGTGTCAGCCAAGGTTCCAGGCCAGGAGCGCGGGCGGTGCGGCACACGTCCAGAGGATCCATTACCATCAATCAAGGTAAGGTCAAGGTAAGGCTAATTAAACACCGGGAACGGTGCCCTTATTGTTTGCAGGTGATTTATGGGGGCAATTCAGGCGGCAAACCGCGTGTGGTGCCCTGGAATGTGCAACCCTAGCGGTCTTCACCGGGTGCGGTGTGGCACTCCTAGGTTTGCTTTCTAATCTTCTA…
Equus_ferus_caballus_papillomavirus_type_5_complete_genome_JQ031033.1	7519	5398	5793	NODE_320_length_790_cov_1.193548	418	17	405	66.667	8.52e-24	TTCCTGTTTTCCAGATGGCATTGTGGACCAAGAATATGCAGCATCTGTACCTGCCGCCGCCGCCTGTTACTAAGGTGCTCAGCACGGATGACTATGTTGTCAGACACTCCATATTTTATCATGGCAACAGTGAGCGCTTGCTTACAGTGGGCCATCCCTATTTTGCACTTAAGGATGGGGGTAAAAAACTGGATGTTCCTAAGGTGTCCCCAAATCAGTATAGGGTGTTTGAGGTGGTTTTGCCAAACCCCAACAAATTTGC-CTT--AGCTGACCCTAGCATCTATAACCCAGAGGTGTCTAGGCTGGTGTGGGCAGTGCGGGGCCTAGAGGTTTCACGTGGTCAGCCTCTTGGTGTGGGTCTTTCAGGTAACCCTAACTTTAACCGCCTGTTAGATG…
Equus_ferus_caballus_papillomavirus_type_5_complete_genome_NC_020084.1	7519	5398	5793	NODE_320_length_790_cov_1.193548	418	17	405	66.667	8.52e-24	TTCCTGTTTTCCAGATGGCATTGTGGACCAAGAATATGCAGCATCTGTACCTGCCGCCGCCGCCTGTTACTAAGGTGCTCAGCACGGATGACTATGTTGTCAGACACTCCATATTTTATCATGGCAACAGTGAGCGCTTGCTTACAGTGGGCCATCCCTATTTTGCACTTAAGGATGGGGGTAAAAAACTGGATGTTCCTAAGGTGTCCCCAAATCAGTATAGGGTGTTTGAGGTGGTTTTGCCAAACCCCAACAAATTTGC-CTT--AGCTGACCCTAGCATCTATAACCCAGAGGTGTCTAGGCTGGTGTGGGCAGTGCGGGGCCTAGAGGTTTCACGTGGTCAGCCTCTTGGTGTGGGTCTTTCAGGTAACCCTAACTTTAACCGCCTGTTAGATG…
Equus_caballus_papillomavirus_2_isolate_XJ-ks1391_complete_genome_MW410986.1	7802	5609	6010	NODE_320_length_790_cov_1.193548	468	67	402	71.642	3.51e-54	TTTGACCTGCACCCCTCACTCCTGAGGCGCAAGAGGAAACGGAGGTATGCTTCCTGTTTTCCAGATGGCATTGTGGACCAAGAATATGCAGCATCTGTACCTGCCGCCGCCGCCTGTTACTAAGGTGCTCAGCACGGATGACTATGTTGTCAGACACTCCATATTTTATCATGGCAACAGTGAGCGCTTGCTTACAGTGGGCCATCCCTATTTTGCACTTAAGGATGGGGGTAAAAAACTGGATGTTCCTAAGGTGTCCCCAAATCAGTATAGGGTGTTTGAGGTGGTTTTGCCAAACCCCAACAAATTTGCCTTAGCTGACCCTAGCATCTATAACCCAGAGGTGTCTAGGCTGGTGTGGGCAGTGCGGGGCCTAGAGGTTTCACGTGGTCAGCCTCT…
Equine_papillomavirus_2_isolate_Zurich_2009_HM461973.1_complete_genome	7803	5610	6011	NODE_320_length_790_cov_1.193548	468	67	402	72.139	6.79e-57	TTTGACCTGCACCCCTCACTCCTGAGGCGCAAGAGGAAACGGAGGTATGCTTCCTGTTTTCCAGATGGCATTGTGGACCAAGAATATGCAGCATCTGTACCTGCCGCCGCCGCCTGTTACTAAGGTGCTCAGCACGGATGACTATGTTGTCAGACACTCCATATTTTATCATGGCAACAGTGAGCGCTTGCTTACAGTGGGCCATCCCTATTTTGCACTTAAGGATGGGGGTAAAAAACTGGATGTTCCTAAGGTGTCCCCAAATCAGTATAGGGTGTTTGAGGTGGTTTTGCCAAACCCCAACAAATTTGCCTTAGCTGACCCTAGCATCTATAACCCAGAGGTGTCTAGGCTGGTGTGGGCAGTGCGGGGCCTAGAGGTTTCACGTGGTCAGCCTCT…
Equine_papillomavirus_2_complete_genome_EU503122.1	7802	5609	6010	NODE_320_length_790_cov_1.193548	468	67	402	71.642	3.51e-54	TTTGACCTGCACCCCTCACTCCTGAGGCGCAAGAGGAAACGGAGGTATGCTTCCTGTTTTCCAGATGGCATTGTGGACCAAGAATATGCAGCATCTGTACCTGCCGCCGCCGCCTGTTACTAAGGTGCTCAGCACGGATGACTATGTTGTCAGACACTCCATATTTTATCATGGCAACAGTGAGCGCTTGCTTACAGTGGGCCATCCCTATTTTGCACTTAAGGATGGGGGTAAAAAACTGGATGTTCCTAAGGTGTCCCCAAATCAGTATAGGGTGTTTGAGGTGGTTTTGCCAAACCCCAACAAATTTGCCTTAGCTGACCCTAGCATCTATAACCCAGAGGTGTCTAGGCTGGTGTGGGCAGTGCGGGGCCTAGAGGTTTCACGTGGTCAGCCTCT…
Equine_papillomavirus_2_complete_genome_NC_012123.1	7802	5609	6010	NODE_320_length_790_cov_1.193548	468	67	402	71.642	3.51e-54	TTTGACCTGCACCCCTCACTCCTGAGGCGCAAGAGGAAACGGAGGTATGCTTCCTGTTTTCCAGATGGCATTGTGGACCAAGAATATGCAGCATCTGTACCTGCCGCCGCCGCCTGTTACTAAGGTGCTCAGCACGGATGACTATGTTGTCAGACACTCCATATTTTATCATGGCAACAGTGAGCGCTTGCTTACAGTGGGCCATCCCTATTTTGCACTTAAGGATGGGGGTAAAAAACTGGATGTTCCTAAGGTGTCCCCAAATCAGTATAGGGTGTTTGAGGTGGTTTTGCCAAACCCCAACAAATTTGCCTTAGCTGACCCTAGCATCTATAACCCAGAGGTGTCTAGGCTGGTGTGGGCAGTGCGGGGCCTAGAGGTTTCACGTGGTCAGCCTCT…
Equine_papillomavirus_3_isolate_Haflinger_GU384895.1_complete_genome	7582	5280	5663	NODE_320_length_790_cov_1.193548	432	52	390	66.41	3.42e-16	AAACGGAGGTATGCTTCCTGTTTTCCAGATGGCATTGTGGACCAAGAATATGCAGCATCTGTACCTGCCGCCGCCGCCTGTTACTAAGGTGC-TCAGCACGGATGACTATGTTGTCAGACACTC-CATATTTTATCATGGCAACAGTGAGCGCTTGCTTACAGTGGGCCATCCCTATTTT--GCA--CTTAAGGATGG---GGGTAAAAAACTGGATGTTCCTAAGGTGTCCCCAAATCAGTATAGGGTGTTTGAGGTGGTTTTGCCAAACCCCAACAAATTTGCCTTAGCTGACCCTAGCATCTATAACCCAGAGGTGTCTAGGCTGGTGTGGGCAGTGCGGGGCCTAGAGGTTTCACGTGGTCAGCCTCTTGGTGTGGGTCTTTCAGG
Equine_papillomavirus_3_complete_genome_NC_017862.1	7582	5280	5663	NODE_320_length_790_cov_1.193548	432	52	390	66.41	3.42e-16	AAACGGAGGTATGCTTCCTGTTTTCCAGATGGCATTGTGGACCAAGAATATGCAGCATCTGTACCTGCCGCCGCCGCCTGTTACTAAGGTGC-TCAGCACGGATGACTATGTTGTCAGACACTC-CATATTTTATCATGGCAACAGTGAGCGCTTGCTTACAGTGGGCCATCCCTATTTT--GCA--CTTAAGGATGG---GGGTAAAAAACTGGATGTTCCTAAGGTGTCCCCAAATCAGTATAGGGTGTTTGAGGTGGTTTTGCCAAACCCCAACAAATTTGCCTTAGCTGACCCTAGCATCTATAACCCAGAGGTGTCTAGGCTGGTGTGGGCAGTGCGGGGCCTAGAGGTTTCACGTGGTCAGCCTCTTGGTGTGGGTCTTTCAGG
Equus_ferus_caballus_papillomavirus_type_5_complete_genome_JQ031033.1	7519	6273	6634	NODE_247_length_910_cov_2.121248	425	64	367	70.845	5.37e-39	ACACCCAGTGGGTCTCTGGTGTCCACTGATTCTCAGATTTTTAACAGGCCCTACTGGCTGCAGCGCGCACAGGGCCTAAATAATGGCGTCTGCTGGCATGACAAGCTTTATGTTACAGTGTTTGACAATACTAGGGGCACCAACTTTACTATATCTGTAAAGAAGCAGGCGG-CTGGTGGT-GATCAGTATGATCCTAAGA--ACTATC-ATGTGTACCTCAGGCATGTAGAGGAGTTTGAACTATCTTTTATTTTTGAGCTTTGCAGCGTGCCACTGACCCCGGAGACCATGGCGCACCTGCACACTATGGACCCCACCATATTAGAGGACTGGGAGATAGGCATTAACCCCCCTGTTTCATCCCA
Equus_ferus_caballus_papillomavirus_type_5_complete_genome_NC_020084.1	7519	6273	6634	NODE_247_length_910_cov_2.121248	425	64	367	70.845	5.37e-39	ACACCCAGTGGGTCTCTGGTGTCCACTGATTCTCAGATTTTTAACAGGCCCTACTGGCTGCAGCGCGCACAGGGCCTAAATAATGGCGTCTGCTGGCATGACAAGCTTTATGTTACAGTGTTTGACAATACTAGGGGCACCAACTTTACTATATCTGTAAAGAAGCAGGCGG-CTGGTGGT-GATCAGTATGATCCTAAGA--ACTATC-ATGTGTACCTCAGGCATGTAGAGGAGTTTGAACTATCTTTTATTTTTGAGCTTTGCAGCGTGCCACTGACCCCGGAGACCATGGCGCACCTGCACACTATGGACCCCACCATATTAGAGGACTGGGAGATAGGCATTAACCCCCCTGTTTCATCCCA
Equus_caballus_papillomavirus_8_strain_NCSU_complete_genome_KU963288.1	8155	1743	2096	NODE_43_length_2268_cov_2.465997	357	2	358	64.246	7.59e-06	ATGGTGCAGTGGGCCTATGACAATAACTACATGGACGAAAGCACAATAGCATATCAATATGCCCTGATGGCAGATGTGGACAGGAATGCTGCTGCGTTTCTGTCCTGTACTGCCCAGGCAAAATATGTTCGAGA-TGTGTCAACCATGGTGAAACACTATAAGCGGGCGGAGATGCATAGCATGAGTATGTCAAACTGGATTCATAA-ACAGTGTAACAGTGCAGAGGGCGAGGGTGATTGGAGGGTGATAATTAAGTTTCTAAAGTATCAGAATGTGGAAATACCCAGGTTTGTGACAAGCCTAAAGCACTTTCTGAAAGGCGTCCCCAAAAAAAGCTGCTTAGCAATATTTGGGGA
Equus_caballus_papillomavirus_8_strain_NCSU_complete_genome_NC_031756.1	8155	1743	2096	NODE_43_length_2268_cov_2.465997	357	2	358	64.246	7.59e-06	ATGGTGCAGTGGGCCTATGACAATAACTACATGGACGAAAGCACAATAGCATATCAATATGCCCTGATGGCAGATGTGGACAGGAATGCTGCTGCGTTTCTGTCCTGTACTGCCCAGGCAAAATATGTTCGAGA-TGTGTCAACCATGGTGAAACACTATAAGCGGGCGGAGATGCATAGCATGAGTATGTCAAACTGGATTCATAA-ACAGTGTAACAGTGCAGAGGGCGAGGGTGATTGGAGGGTGATAATTAAGTTTCTAAAGTATCAGAATGTGGAAATACCCAGGTTTGTGACAAGCCTAAAGCACTTTCTGAAAGGCGTCCCCAAAAAAAGCTGCTTAGCAATATTTGGGGA
Equus_ferus_caballus_papillomavirus_type_4_complete_genome_NC_020085.1	7554	5410	5758	NODE_320_length_790_cov_1.193548	417	63	356	67.697	5.77e-26	TCCTGTTTTCCAGATGGCATTGTGGAC-CAAGAATATGCAGCATCTGTACCTGCCGCCGCCGCCTGTTACTAAGGTGCTCAGCACGGATGACTATGTTGTCAGACACTCCATATTTTATCATGGCAACAGTGAGCGCTTGCTTACAGTGGGCCATCCCTATTTTGCACTTAAGGATGGGGGTAAAAAACTGGATGTTCCTAAGGTGTCCCCAAATCAGTATAGGGTGTTTGAGGTGGTTTTGCCAAACCCCAACAAATTTGCCTTAGCTGACCCTAGCATCTATAACCCAGAGGTGTCTAGGCTGGTGTGGGCAGTGCGGGGCCTAGAGGTTTCACGTGGTCAGCCTCTTGGTGTG
Equus_ferus_caballus_papillomavirus_type_4_complete_genome_JQ031032.1	7554	5410	5758	NODE_320_length_790_cov_1.193548	417	63	356	67.697	5.77e-26	TCCTGTTTTCCAGATGGCATTGTGGAC-CAAGAATATGCAGCATCTGTACCTGCCGCCGCCGCCTGTTACTAAGGTGCTCAGCACGGATGACTATGTTGTCAGACACTCCATATTTTATCATGGCAACAGTGAGCGCTTGCTTACAGTGGGCCATCCCTATTTTGCACTTAAGGATGGGGGTAAAAAACTGGATGTTCCTAAGGTGTCCCCAAATCAGTATAGGGTGTTTGAGGTGGTTTTGCCAAACCCCAACAAATTTGCCTTAGCTGACCCTAGCATCTATAACCCAGAGGTGTCTAGGCTGGTGTGGGCAGTGCGGGGCCTAGAGGTTTCACGTGGTCAGCCTCTTGGTGTG
Equus_caballus_papillomavirus_8_strain_NCSU_complete_genome_KU963288.1	8155	6130	6476	NODE_320_length_790_cov_1.193548	380	31	353	66.856	8.66e-18	CAGCATCTGTACCTGCCGCCGCCGCCTGTTACTAAGGTGCTCAGCACGGATGACTATGTTGTCAGACACTCCATATTTTATCATGGCAACAGTGAGCGCTTGCTTACAGTGGGCCATCCCTATTTTGCACTTAAGGATGGGGGTAAAAAACTGGATGTTCCTAAGGTGTCCCCAAATCAGTATAGGGTGTTTGAGGTGGTTTTGCCAAACCCCAACAAATTTGCCTTAGCTGACCCTAG-CA-TCTATAACCCAG-AGGTGTCTAGGCTGGTGTGGGCAGTGCGGGGCCTAGAGGTTTCACGTGGTCAGCCTCTTGGTGTGGGTCTTTCAGGTAACCCTAACTTTAACCGCCT
Equus_caballus_papillomavirus_8_strain_NCSU_complete_genome_NC_031756.1	8155	6130	6476	NODE_320_length_790_cov_1.193548	380	31	353	66.856	8.66e-18	CAGCATCTGTACCTGCCGCCGCCGCCTGTTACTAAGGTGCTCAGCACGGATGACTATGTTGTCAGACACTCCATATTTTATCATGGCAACAGTGAGCGCTTGCTTACAGTGGGCCATCCCTATTTTGCACTTAAGGATGGGGGTAAAAAACTGGATGTTCCTAAGGTGTCCCCAAATCAGTATAGGGTGTTTGAGGTGGTTTTGCCAAACCCCAACAAATTTGCCTTAGCTGACCCTAG-CA-TCTATAACCCAG-AGGTGTCTAGGCTGGTGTGGGCAGTGCGGGGCCTAGAGGTTTCACGTGGTCAGCCTCTTGGTGTGGGTCTTTCAGGTAACCCTAACTTTAACCGCCT
Equus_ferus_caballus_papillomavirus_type_4_complete_genome_NC_020085.1	7554	6296	6639	NODE_247_length_910_cov_2.121248	422	79	348	71.552	2.45e-43	CCCAGTGGGTCTCTGGTGTCCACTGATTCTCAGATTTTTAACAGGCCCTACTGGCTGCAGCGCGCACAGGGCCTAAATAATGGCGTCTGCTGGCATGACAAGCTTTATGTTACAGTGTTTGACAATACTAGGGGCACCAACTTTACTATATCTGT----AAAGAAGCAGGCGGCTGGTGGTGATCAGTATGATCCTAAGAACTATCATGTGTACCTCAGGCATGTAGAGGAGTTTGAACTATCTTTTATTTTTGAGCTTTGCAGCGTGCCACTGACCCCGGAGACCATGGCGCACCTGCACACTATGGACCCCACCATATTAGAGGACTGGGAGATAGGCATTAACCC
Equus_ferus_caballus_papillomavirus_type_4_complete_genome_JQ031032.1	7554	6296	6639	NODE_247_length_910_cov_2.121248	422	79	348	71.552	2.45e-43	CCCAGTGGGTCTCTGGTGTCCACTGATTCTCAGATTTTTAACAGGCCCTACTGGCTGCAGCGCGCACAGGGCCTAAATAATGGCGTCTGCTGGCATGACAAGCTTTATGTTACAGTGTTTGACAATACTAGGGGCACCAACTTTACTATATCTGT----AAAGAAGCAGGCGGCTGGTGGTGATCAGTATGATCCTAAGAACTATCATGTGTACCTCAGGCATGTAGAGGAGTTTGAACTATCTTTTATTTTTGAGCTTTGCAGCGTGCCACTGACCCCGGAGACCATGGCGCACCTGCACACTATGGACCCCACCATATTAGAGGACTGGGAGATAGGCATTAACCC
Equus_caballus_papillomavirus_8_strain_NCSU_complete_genome_KU963288.1	8155	6966	7307	NODE_247_length_910_cov_2.121248	435	94	347	66.859	1.13e-22	GTACACACACACACCCAGTGGGTCTCTGGTGTCCACTGATTCTCAGATTTTTAACAGGCCCTACTGGCTGCAGCGCGCACAGGGCCTAAATAATGGCGTCTGCTGGCATGACAAGCTTTATGTTACAGTGTTTGACAATACTAGGGGCACCAACTTTACTATATCTGT-----AAAGAAGCAGGCGGCTGGTGGTGATCAGTATGATCCTAAGAACTATCATGTGTACCTCAGGCATGTAGAGGAGTTTGAACTATCTTTTATTTTTGAGCTTTGCAGCGTGCCACTGACCCCGGAGACCATGGCGCACCTGCACACTATGGACCCCACCATATTAGAGGACTGGGA
Equus_caballus_papillomavirus_8_strain_NCSU_complete_genome_NC_031756.1	8155	6966	7307	NODE_247_length_910_cov_2.121248	435	94	347	66.859	1.13e-22	GTACACACACACACCCAGTGGGTCTCTGGTGTCCACTGATTCTCAGATTTTTAACAGGCCCTACTGGCTGCAGCGCGCACAGGGCCTAAATAATGGCGTCTGCTGGCATGACAAGCTTTATGTTACAGTGTTTGACAATACTAGGGGCACCAACTTTACTATATCTGT-----AAAGAAGCAGGCGGCTGGTGGTGATCAGTATGATCCTAAGAACTATCATGTGTACCTCAGGCATGTAGAGGAGTTTGAACTATCTTTTATTTTTGAGCTTTGCAGCGTGCCACTGACCCCGGAGACCATGGCGCACCTGCACACTATGGACCCCACCATATTAGAGGACTGGGA
Equine_papillomavirus_3_isolate_Haflinger_GU384895.1_complete_genome	7582	6178	6510	NODE_247_length_910_cov_2.121248	425	84	343	70.262	2.3e-37	ACACCCAGTGGGTCTCTGGTGTCCACTGATTCTCAGATTTTTAACAGGCCCTACTGGCTGCAGCGCGCACAGGGCCTAAATAATGGCGTCTGCTGGCATGACAAGCTTTATGTTACAGTGTTTGACAATACTAGGGGCACCAACTTTACTATATCTGTAAAGAAGCAGGCGGCTGGTGG-TGATCAGTATGATCCTAAGAACTATCATGTGTACCTCAGGCATGTAGAGGAGTTTGAACTATCTTTTATTTTTGAGCTTTGCAGCGTGCCACTGACCCCGGAGACCATGGCGCACCTGCACACTATGGACCCCACCATATTAGAGGACTGGGAGATAGGCATT
Equine_papillomavirus_3_complete_genome_NC_017862.1	7582	6178	6510	NODE_247_length_910_cov_2.121248	425	84	343	70.262	2.3e-37	ACACCCAGTGGGTCTCTGGTGTCCACTGATTCTCAGATTTTTAACAGGCCCTACTGGCTGCAGCGCGCACAGGGCCTAAATAATGGCGTCTGCTGGCATGACAAGCTTTATGTTACAGTGTTTGACAATACTAGGGGCACCAACTTTACTATATCTGTAAAGAAGCAGGCGGCTGGTGG-TGATCAGTATGATCCTAAGAACTATCATGTGTACCTCAGGCATGTAGAGGAGTTTGAACTATCTTTTATTTTTGAGCTTTGCAGCGTGCCACTGACCCCGGAGACCATGGCGCACCTGCACACTATGGACCCCACCATATTAGAGGACTGGGAGATAGGCATT
Equus_caballus_papillomavirus_2_isolate_XJ-ks1391_complete_genome_MW410986.1	7802	2515	2838	NODE_98_length_1475_cov_1.992132	1	324	333	69.67	2.08e-25	TGGACCTTAAGCACAGAGCACCCT-TGCAGTTGAGGTGCCCCCCCATACTAGTCACCTCAAACATAGATGTGCGGAGGCAGGA---CAAATATCGGTACCTATACAG---CAGGATGGCCTGCTTCACCTTTGACAACCCCTATCCCCTGGATGAAAATGGAGAACCTGTATTTCCCCTAACTGTTGAACATTGGGCCTCTTTCTTTACAAGGTGGTGGAAACGCCTAGATCTCAGTGAACCAGAGGACGAAGGGGAAGATGGAGAGGCTACGGAAAGCTTTAGATG--CTGTTCTAGAAGAGCAGATGCTTCTCTATGAGGGGGGCAGCACA
Equine_papillomavirus_2_isolate_Zurich_2009_HM461973.1_complete_genome	7803	2516	2839	NODE_98_length_1475_cov_1.992132	1	324	333	69.67	2.08e-25	TGGACCTTAAGCACAGAGCACCCT-TGCAGTTGAGGTGCCCCCCCATACTAGTCACCTCAAACATAGATGTGCGGAGGCAGGA---CAAATATCGGTACCTATACAG---CAGGATGGCCTGCTTCACCTTTGACAACCCCTATCCCCTGGATGAAAATGGAGAACCTGTATTTCCCCTAACTGTTGAACATTGGGCCTCTTTCTTTACAAGGTGGTGGAAACGCCTAGATCTCAGTGAACCAGAGGACGAAGGGGAAGATGGAGAGGCTACGGAAAGCTTTAGATG--CTGTTCTAGAAGAGCAGATGCTTCTCTATGAGGGGGGCAGCACA
Equine_papillomavirus_2_complete_genome_EU503122.1	7802	2515	2838	NODE_98_length_1475_cov_1.992132	1	324	333	69.67	2.08e-25	TGGACCTTAAGCACAGAGCACCCT-TGCAGTTGAGGTGCCCCCCCATACTAGTCACCTCAAACATAGATGTGCGGAGGCAGGA---CAAATATCGGTACCTATACAG---CAGGATGGCCTGCTTCACCTTTGACAACCCCTATCCCCTGGATGAAAATGGAGAACCTGTATTTCCCCTAACTGTTGAACATTGGGCCTCTTTCTTTACAAGGTGGTGGAAACGCCTAGATCTCAGTGAACCAGAGGACGAAGGGGAAGATGGAGAGGCTACGGAAAGCTTTAGATG--CTGTTCTAGAAGAGCAGATGCTTCTCTATGAGGGGGGCAGCACA
Equine_papillomavirus_2_complete_genome_NC_012123.1	7802	2515	2838	NODE_98_length_1475_cov_1.992132	1	324	333	69.67	2.08e-25	TGGACCTTAAGCACAGAGCACCCT-TGCAGTTGAGGTGCCCCCCCATACTAGTCACCTCAAACATAGATGTGCGGAGGCAGGA---CAAATATCGGTACCTATACAG---CAGGATGGCCTGCTTCACCTTTGACAACCCCTATCCCCTGGATGAAAATGGAGAACCTGTATTTCCCCTAACTGTTGAACATTGGGCCTCTTTCTTTACAAGGTGGTGGAAACGCCTAGATCTCAGTGAACCAGAGGACGAAGGGGAAGATGGAGAGGCTACGGAAAGCTTTAGATG--CTGTTCTAGAAGAGCAGATGCTTCTCTATGAGGGGGGCAGCACA
Equus_ferus_caballus_papillomavirus_type_5_complete_genome_JQ031033.1	7519	2244	2571	NODE_98_length_1475_cov_1.992132	3	324	331	66.163	1.76e-13	GACCTTAAGCACAGAGCACCCTTGCAGTTGAGGTGCCCCCCCATACTAGTCACCTCAAACATAGATGTGCGGAGGCAGGACAAATATCGGTACCTATACAGCAGGATGGCCTGCTTCACCTTTGACAACCCCTATCCCCTGGATGAAAATGGAGAACCTGTATTTCCCCTAACTGTTGAACATTGGGCCTCTTTCTTTACAAGGTGGTGGAAACGCCTAGATCT----CAG--TGAACCAGAGGACGAAGGGGAAGATGGAGAGGCTA--CGGAAAGCTTTAGATGCTGTTCTAGAAGAGCAGATG-CTTCTCTATGAGGGGGGCAGCACA
Equus_ferus_caballus_papillomavirus_type_5_complete_genome_NC_020084.1	7519	2244	2571	NODE_98_length_1475_cov_1.992132	3	324	331	66.163	1.76e-13	GACCTTAAGCACAGAGCACCCTTGCAGTTGAGGTGCCCCCCCATACTAGTCACCTCAAACATAGATGTGCGGAGGCAGGACAAATATCGGTACCTATACAGCAGGATGGCCTGCTTCACCTTTGACAACCCCTATCCCCTGGATGAAAATGGAGAACCTGTATTTCCCCTAACTGTTGAACATTGGGCCTCTTTCTTTACAAGGTGGTGGAAACGCCTAGATCT----CAG--TGAACCAGAGGACGAAGGGGAAGATGGAGAGGCTA--CGGAAAGCTTTAGATGCTGTTCTAGAAGAGCAGATG-CTTCTCTATGAGGGGGGCAGCACA
Equus_caballus_papillomavirus_1_strain_150904_complete_genome_MF288893.1	7613	6138	6461	NODE_247_length_910_cov_2.121248	398	75	326	67.485	1.56e-20	GATTCTCAGATTTTTAACAGGCCCTACTGGCTGCAGCGCGCACAGGGCCTAAATAATGGCGTCTGCTGGCATGACAAGCTTTATGTTACAGTGTTTGACAATACTAGGGGCACCAACTTTACTATATCTGTAAAGAAGCAGGCG-GCTGGTG-GTGATCAGTATGATCCTAAGAACTATCATGTGTACCTCAGGCATGTAGAGGAGTTTGAACTATCTTTTATTTTTGAGCTTTGCAGCGTGCCACTGACCCCGGAGACCATGGCGCACCTGCACACTATGGACCCCACCATATTAGAGGACTGGGAGATAGGCATTAACCCCCCT
Equus_caballus_papillomavirus_1_isolate_G2_complete_genome_MN164462.1	7611	6135	6458	NODE_247_length_910_cov_2.121248	398	75	326	67.178	1.9e-19	GATTCTCAGATTTTTAACAGGCCCTACTGGCTGCAGCGCGCACAGGGCCTAAATAATGGCGTCTGCTGGCATGACAAGCTTTATGTTACAGTGTTTGACAATACTAGGGGCACCAACTTTACTATATCTGTAAAGAAGCAGGCG-GCTGGTG-GTGATCAGTATGATCCTAAGAACTATCATGTGTACCTCAGGCATGTAGAGGAGTTTGAACTATCTTTTATTTTTGAGCTTTGCAGCGTGCCACTGACCCCGGAGACCATGGCGCACCTGCACACTATGGACCCCACCATATTAGAGGACTGGGAGATAGGCATTAACCCCCCT
Equus_caballus_papillomavirus_type_1_complete_genome_AF498323.1	7610	6135	6458	NODE_247_length_910_cov_2.121248	398	75	326	67.485	1.56e-20	GATTCTCAGATTTTTAACAGGCCCTACTGGCTGCAGCGCGCACAGGGCCTAAATAATGGCGTCTGCTGGCATGACAAGCTTTATGTTACAGTGTTTGACAATACTAGGGGCACCAACTTTACTATATCTGTAAAGAAGCAGGCG-GCTGGTG-GTGATCAGTATGATCCTAAGAACTATCATGTGTACCTCAGGCATGTAGAGGAGTTTGAACTATCTTTTATTTTTGAGCTTTGCAGCGTGCCACTGACCCCGGAGACCATGGCGCACCTGCACACTATGGACCCCACCATATTAGAGGACTGGGAGATAGGCATTAACCCCCCT
Equus_caballus_papillomavirus_type_1_complete_genome_NC_003748.1	7610	6135	6458	NODE_247_length_910_cov_2.121248	398	75	326	67.485	1.56e-20	GATTCTCAGATTTTTAACAGGCCCTACTGGCTGCAGCGCGCACAGGGCCTAAATAATGGCGTCTGCTGGCATGACAAGCTTTATGTTACAGTGTTTGACAATACTAGGGGCACCAACTTTACTATATCTGTAAAGAAGCAGGCG-GCTGGTG-GTGATCAGTATGATCCTAAGAACTATCATGTGTACCTCAGGCATGTAGAGGAGTTTGAACTATCTTTTATTTTTGAGCTTTGCAGCGTGCCACTGACCCCGGAGACCATGGCGCACCTGCACACTATGGACCCCACCATATTAGAGGACTGGGAGATAGGCATTAACCCCCCT
Equus_caballus_papillomavirus_8_strain_NCSU_complete_genome_KU963288.1	8155	2305	2626	NODE_98_length_1475_cov_1.992132	1	322	325	64.308	7.59e-06	TGGACCTTAAGCACAGAGCACCCTTGCAGTTGAGGTGCCCCCCCATACTAGTCACCTCAAACATAGATGTGCGG--AGGCAGGACAAATATCGGTACCTATACAGCAGGATGGCCTGC-TTCACCTTTGACAACCCCTATCCCCTGGATGAAAATGGAGAACCTGTATTTCCCCTAACTGTTGAACATTGGGCCTCTTTCTTTACAAGGTGGTGGAAACGCCTAGATCTCAGTGAACCAGAGGACGAAGGGGAAGATGGAGAGGCTACGGAAAGCTTTAGATGCTGTTCTAGAAGAGCAGATGCTTCTCTATGAGGGGGGCAGCA
Equus_caballus_papillomavirus_8_strain_NCSU_complete_genome_NC_031756.1	8155	2305	2626	NODE_98_length_1475_cov_1.992132	1	322	325	64.308	7.59e-06	TGGACCTTAAGCACAGAGCACCCTTGCAGTTGAGGTGCCCCCCCATACTAGTCACCTCAAACATAGATGTGCGG--AGGCAGGACAAATATCGGTACCTATACAGCAGGATGGCCTGC-TTCACCTTTGACAACCCCTATCCCCTGGATGAAAATGGAGAACCTGTATTTCCCCTAACTGTTGAACATTGGGCCTCTTTCTTTACAAGGTGGTGGAAACGCCTAGATCTCAGTGAACCAGAGGACGAAGGGGAAGATGGAGAGGCTACGGAAAGCTTTAGATGCTGTTCTAGAAGAGCAGATGCTTCTCTATGAGGGGGGCAGCA
Equus_ferus_caballus_papillomavirus_type_4_complete_genome_NC_020085.1	7554	5846	6164	NODE_247_length_910_cov_2.121248	881	563	321	69.47	1.11e-28	GACAAGCGTGTCAATATAGCTTTTGATGTCAAGCAAAGCCAGGTTCTTATTGTGGGCTGCACACCTGCAATAGGGGAGCACTGGAAGTTGGCTAAGGCCTGTGGTGGTGTTCCTGCAGACAACT--GCCCTCCTTTAGAGCTAGTAAAGACACAGATTGAGGATGGGGACATGGGCGAGGTGGGCTTTGGTGCAATGGATTTTAAAGCCTTGCAGGCCAGCAGGTCTGAGGTGCCCCTGGACCTGGTGGACACTACCTCCAAGTACCCTGACTACATACAAATGGGCCAGGAGACATCTGGAAACAGCATGTTTTTCTTTG
Equus_ferus_caballus_papillomavirus_type_4_complete_genome_JQ031032.1	7554	5846	6164	NODE_247_length_910_cov_2.121248	881	563	321	69.47	1.11e-28	GACAAGCGTGTCAATATAGCTTTTGATGTCAAGCAAAGCCAGGTTCTTATTGTGGGCTGCACACCTGCAATAGGGGAGCACTGGAAGTTGGCTAAGGCCTGTGGTGGTGTTCCTGCAGACAACT--GCCCTCCTTTAGAGCTAGTAAAGACACAGATTGAGGATGGGGACATGGGCGAGGTGGGCTTTGGTGCAATGGATTTTAAAGCCTTGCAGGCCAGCAGGTCTGAGGTGCCCCTGGACCTGGTGGACACTACCTCCAAGTACCCTGACTACATACAAATGGGCCAGGAGACATCTGGAAACAGCATGTTTTTCTTTG
Equus_caballus_papillomavirus_1_strain_150904_complete_genome_MF288893.1	7613	1629	1873	NODE_43_length_2268_cov_2.465997	396	152	248	70.565	3.67e-22	CACCAAACAGAAGATGCTATGAAATTTGATATGTCACAAATGGTGCAGTGGGCCTATGACAATAACTACATGGACGAAAGCAC--AATAGCATATCAATATGCCCTGATGGCAGATGTGGACAGGAATGCTGCTGCGTTTCT-GTCCTGTACTGCCCAGGCAAAATATGTTCGAGATGTGTCAACCATGGTGAAACACTATAAGCGGGCGGAGATGCATAGCATGAGTATGTCAAACTGGATTCATAA
Equus_caballus_papillomavirus_1_isolate_G2_complete_genome_MN164462.1	7611	1629	1873	NODE_43_length_2268_cov_2.465997	396	152	248	70.565	3.67e-22	CACCAAACAGAAGATGCTATGAAATTTGATATGTCACAAATGGTGCAGTGGGCCTATGACAATAACTACATGGACGAAAGCAC--AATAGCATATCAATATGCCCTGATGGCAGATGTGGACAGGAATGCTGCTGCGTTTCT-GTCCTGTACTGCCCAGGCAAAATATGTTCGAGATGTGTCAACCATGGTGAAACACTATAAGCGGGCGGAGATGCATAGCATGAGTATGTCAAACTGGATTCATAA
Equus_caballus_papillomavirus_type_1_complete_genome_AF498323.1	7610	1629	1873	NODE_43_length_2268_cov_2.465997	396	152	248	70.565	3.67e-22	CACCAAACAGAAGATGCTATGAAATTTGATATGTCACAAATGGTGCAGTGGGCCTATGACAATAACTACATGGACGAAAGCAC--AATAGCATATCAATATGCCCTGATGGCAGATGTGGACAGGAATGCTGCTGCGTTTCT-GTCCTGTACTGCCCAGGCAAAATATGTTCGAGATGTGTCAACCATGGTGAAACACTATAAGCGGGCGGAGATGCATAGCATGAGTATGTCAAACTGGATTCATAA
Equus_caballus_papillomavirus_type_1_complete_genome_NC_003748.1	7610	1629	1873	NODE_43_length_2268_cov_2.465997	396	152	248	70.565	3.67e-22	CACCAAACAGAAGATGCTATGAAATTTGATATGTCACAAATGGTGCAGTGGGCCTATGACAATAACTACATGGACGAAAGCAC--AATAGCATATCAATATGCCCTGATGGCAGATGTGGACAGGAATGCTGCTGCGTTTCT-GTCCTGTACTGCCCAGGCAAAATATGTTCGAGATGTGTCAACCATGGTGAAACACTATAAGCGGGCGGAGATGCATAGCATGAGTATGTCAAACTGGATTCATAA
Equus_caballus_papillomavirus_1_strain_150904_complete_genome_MF288893.1	7613	5313	5552	NODE_320_length_790_cov_1.193548	308	72	246	69.106	6.21e-13	ATATTTTATCATGGCAACAGTGAGCGCTTGCTTACAGTGGGCCATCCCTATTTTGC-ACTTAAGGA-TGGGGGTAAA-AAAC--TGGATGTTCCTAAGGTGTCCCCAAATCAGTATAGGGTGTTTGAG-GTGGTTTTGCCAAACCCCAACAAATTTGCCTTAGCTGACCCTAGCA---TCTATAACCCAGAGGTGTCTAGGCTGGTGTGGGCAGTGCGGGGCCTAGAGGTTTCACGTGGTCAGCCT
Equus_caballus_papillomavirus_2_isolate_XJ-ks1391_complete_genome_MW410986.1	7802	951	1142	NODE_43_length_2268_cov_2.465997	1342	1150	199	68.844	1.4e-08	GGACGCTGACCCAGGTACAAGCCCCGGGGAGGGGTGCAGCGGAGCATGCTTCATTTTA---AGGGAGGCACAGTGCAGCGACCCTGATAGCGGGGATGA-TGAGGGAGACACCCCAGACAG--TCCAGGTGCCTATGATTTTGTAGATAACGCCTTTGTGAAGCAGGGAAATTCCCTATCTCTATACCAGCAGCAGGAG
Equine_papillomavirus_2_complete_genome_EU503122.1	7802	951	1142	NODE_43_length_2268_cov_2.465997	1342	1150	199	68.844	1.4e-08	GGACGCTGACCCAGGTACAAGCCCCGGGGAGGGGTGCAGCGGAGCATGCTTCATTTTA---AGGGAGGCACAGTGCAGCGACCCTGATAGCGGGGATGA-TGAGGGAGACACCCCAGACAG--TCCAGGTGCCTATGATTTTGTAGATAACGCCTTTGTGAAGCAGGGAAATTCCCTATCTCTATACCAGCAGCAGGAG
Equine_papillomavirus_2_complete_genome_NC_012123.1	7802	951	1142	NODE_43_length_2268_cov_2.465997	1342	1150	199	68.844	1.4e-08	GGACGCTGACCCAGGTACAAGCCCCGGGGAGGGGTGCAGCGGAGCATGCTTCATTTTA---AGGGAGGCACAGTGCAGCGACCCTGATAGCGGGGATGA-TGAGGGAGACACCCCAGACAG--TCCAGGTGCCTATGATTTTGTAGATAACGCCTTTGTGAAGCAGGGAAATTCCCTATCTCTATACCAGCAGCAGGAG
Equine_papillomavirus_3_isolate_Haflinger_GU384895.1_complete_genome	7582	2709	2899	NODE_98_length_1475_cov_1.992132	465	655	195	66.667	0.001	GGCCATAGGCATGGAACTGCGCCT-GACAAGCCTGGCA-CAGTCCGCCTTTGCAGAGGAGCCCTGGACAATGACTGACACCAGTCATGAAACCTTTTGTGCAGCACCAACAGAGACCTTTAAAAAAGAGGGCAGTG--TGGTAACTGTGACATTTGATGGTGAAAGGGGGAATGACATGTGGTACACAAAATGGG
Equine_papillomavirus_3_complete_genome_NC_017862.1	7582	2709	2899	NODE_98_length_1475_cov_1.992132	465	655	195	66.667	0.001	GGCCATAGGCATGGAACTGCGCCT-GACAAGCCTGGCA-CAGTCCGCCTTTGCAGAGGAGCCCTGGACAATGACTGACACCAGTCATGAAACCTTTTGTGCAGCACCAACAGAGACCTTTAAAAAAGAGGGCAGTG--TGGTAACTGTGACATTTGATGGTGAAAGGGGGAATGACATGTGGTACACAAAATGGG
Equus_ferus_caballus_papillomavirus_type_4_complete_genome_NC_020085.1	7554	2239	2427	NODE_98_length_1475_cov_1.992132	25	213	191	65.445	0.004	TGCAGTTGAGGTGCCCCCCCATACTAGTCACCTCAAACATAGATGTGCGGAGGCAGGAC--AAATATCGGTACCTATACAGCAGGATGGCCTGCTTCACCTTTGACAACCCCTATCCCCTGGATGAAAATGGAGAACCTGTATTTCCCCTAACTGTTGAACATTGGGCCTCTTTCTTTACAAGGTGGTGGA
Equus_ferus_caballus_papillomavirus_type_4_complete_genome_JQ031032.1	7554	2239	2427	NODE_98_length_1475_cov_1.992132	25	213	191	65.445	0.004	TGCAGTTGAGGTGCCCCCCCATACTAGTCACCTCAAACATAGATGTGCGGAGGCAGGAC--AAATATCGGTACCTATACAGCAGGATGGCCTGCTTCACCTTTGACAACCCCTATCCCCTGGATGAAAATGGAGAACCTGTATTTCCCCTAACTGTTGAACATTGGGCCTCTTTCTTTACAAGGTGGTGGA
Equine_papillomavirus_type_6_complete_genome_JQ965698.1	7551	1697	1879	NODE_43_length_2268_cov_2.465997	373	191	188	72.34	5.06e-14	ATTTGATATGTCACAAATGGTGCAGTGGGCCTATGACAATAACTAC-ATGGAC-GAAAGCACAATAGCATATCAATATGCCCTGATGGCAGATGTGGACAGGAATGCTGCTGCGTTTCTGTCCTGTACTGCCCAGGCAAAATATGTTC-GAGA-TG-TGTCAACCATGGTGAAACACTATAAGCGGGC
Equine_papillomavirus_type_6_complete_genome_NC_020500.1	7551	1697	1879	NODE_43_length_2268_cov_2.465997	373	191	188	72.34	5.06e-14	ATTTGATATGTCACAAATGGTGCAGTGGGCCTATGACAATAACTAC-ATGGAC-GAAAGCACAATAGCATATCAATATGCCCTGATGGCAGATGTGGACAGGAATGCTGCTGCGTTTCTGTCCTGTACTGCCCAGGCAAAATATGTTC-GAGA-TG-TGTCAACCATGGTGAAACACTATAAGCGGGC
Equus_ferus_caballus_papillomavirus_type_5_complete_genome_JQ031033.1	7519	3980	4165	NODE_142_length_1221_cov_1.395979	79	264	186	70.968	2.29e-18	GCGCTGCCTGCAAAGCGCCGCCGCAGGGCGGCGGTAGAGGACCTTTACAAACAGTGCATAATGGGTGCTGATTGCCCGCCCGATGTGAGACCCCGAGTGGAAGGGGACACATTGGCTGACCGGATTTTGAAATGGGTCAGCTCATTTCTGTATTTGGGCAATTTAGGCATCAGCACCGGACGCGGT
Equus_ferus_caballus_papillomavirus_type_5_complete_genome_NC_020084.1	7519	3980	4165	NODE_142_length_1221_cov_1.395979	79	264	186	70.968	2.29e-18	GCGCTGCCTGCAAAGCGCCGCCGCAGGGCGGCGGTAGAGGACCTTTACAAACAGTGCATAATGGGTGCTGATTGCCCGCCCGATGTGAGACCCCGAGTGGAAGGGGACACATTGGCTGACCGGATTTTGAAATGGGTCAGCTCATTTCTGTATTTGGGCAATTTAGGCATCAGCACCGGACGCGGT
Equus_caballus_papillomavirus_8_strain_NCSU_complete_genome_KU963288.1	8155	1280	1456	NODE_43_length_2268_cov_2.465997	826	650	182	67.582	0.014	GGCGGCTATGCTTGCGCGCTTTAAAGAAGCCTTTGAGG--TCAGCTATACAGAACTCACCAGAGACTTTAAGAGTAATAAGACATGTACTGGGGACTGGGTA--GCACTTGTATACAGTGTGCGTGAGGCGCACTATGAAAGTGCCAAGGAGCTGCT-ACAGCAGCATTGCGACTATCTGCA
Equus_caballus_papillomavirus_8_strain_NCSU_complete_genome_NC_031756.1	8155	1280	1456	NODE_43_length_2268_cov_2.465997	826	650	182	67.582	0.014	GGCGGCTATGCTTGCGCGCTTTAAAGAAGCCTTTGAGG--TCAGCTATACAGAACTCACCAGAGACTTTAAGAGTAATAAGACATGTACTGGGGACTGGGTA--GCACTTGTATACAGTGTGCGTGAGGCGCACTATGAAAGTGCCAAGGAGCTGCT-ACAGCAGCATTGCGACTATCTGCA
Equine_papillomavirus_type_6_complete_genome_JQ965698.1	7551	5512	5687	NODE_320_length_790_cov_1.193548	227	52	176	69.886	5.06e-14	GATGTTCCTAAGGTGTCCCCAAATCAGTATAGGGTGTTTGAGGTGGTTTTGCCAAACCCCAACAAATTTGCCTTAGCTGACCCTAGCATCTATAACCCAGAGGTGTCTAGGCTGGTGTGGGCAGTGCGGGGCCTAGAGGTTTCACGTGGTCAGCCTCTTGGTGTGGGTCTTTCAGG
Equine_papillomavirus_type_6_complete_genome_NC_020500.1	7551	5512	5687	NODE_320_length_790_cov_1.193548	227	52	176	69.886	5.06e-14	GATGTTCCTAAGGTGTCCCCAAATCAGTATAGGGTGTTTGAGGTGGTTTTGCCAAACCCCAACAAATTTGCCTTAGCTGACCCTAGCATCTATAACCCAGAGGTGTCTAGGCTGGTGTGGGCAGTGCGGGGCCTAGAGGTTTCACGTGGTCAGCCTCTTGGTGTGGGTCTTTCAGG
Equine_papillomavirus_3_isolate_Haflinger_GU384895.1_complete_genome	7582	5916	6080	NODE_247_length_910_cov_2.121248	696	532	167	70.06	3.2e-10	TGGTGCAATGGATTTTAAAGCCTTGCAGGCCAGCAGGTCTGAGGTGCCCCTGGACCTGGTGGACACTACCTCCAAGTACCCTGACTACATACAAATGGGCCAGGAGACATCTGGAAACAGCATGTTTTTCTTTGCTC-GC-AGAGAGCAGATGTACACAAGGCATTT
Equine_papillomavirus_3_complete_genome_NC_017862.1	7582	5916	6080	NODE_247_length_910_cov_2.121248	696	532	167	70.06	3.2e-10	TGGTGCAATGGATTTTAAAGCCTTGCAGGCCAGCAGGTCTGAGGTGCCCCTGGACCTGGTGGACACTACCTCCAAGTACCCTGACTACATACAAATGGGCCAGGAGACATCTGGAAACAGCATGTTTTTCTTTGCTC-GC-AGAGAGCAGATGTACACAAGGCATTT
Equus_ferus_caballus_papillomavirus_type_4_complete_genome_NC_020085.1	7554	3991	4155	NODE_142_length_1221_cov_1.395979	91	255	166	71.084	1.77e-13	AAGCGCCGCCGCAGGGCGGCGGTAGAGGACCTTTACAAACAG-TGCATAATGGGTGCTGATTGCCCGCCCGATGTGAGACCCCGAGTGGAAGGGGACACATTGGCTGACCGGATTTTGAAATGGGTCAGCTCATTTCTGTATTTGGGCAATTTAGGCATCAGCACC
Equus_ferus_caballus_papillomavirus_type_4_complete_genome_JQ031032.1	7554	3991	4155	NODE_142_length_1221_cov_1.395979	91	255	166	71.084	1.77e-13	AAGCGCCGCCGCAGGGCGGCGGTAGAGGACCTTTACAAACAG-TGCATAATGGGTGCTGATTGCCCGCCCGATGTGAGACCCCGAGTGGAAGGGGACACATTGGCTGACCGGATTTTGAAATGGGTCAGCTCATTTCTGTATTTGGGCAATTTAGGCATCAGCACC
Equus_caballus_papillomavirus_type_1_complete_genome_AF498323.1	7610	5310	5464	NODE_320_length_790_cov_1.193548	308	157	158	73.418	2.17e-12	ATATTTTATCATGGCAACAGTGAGCGCTTGCTTACAGTGGGCCATCCCTATTTTGC-ACTTAAGGA-TGGGGGTAAA-AAAC--TGGATGTTCCTAAGGTGTCCCCAAATCAGTATAGGGTGTTTGAG-GTGGTTTTGCCAAACCCCAACAAATTTGC
Equus_caballus_papillomavirus_type_1_complete_genome_NC_003748.1	7610	5310	5464	NODE_320_length_790_cov_1.193548	308	157	158	73.418	2.17e-12	ATATTTTATCATGGCAACAGTGAGCGCTTGCTTACAGTGGGCCATCCCTATTTTGC-ACTTAAGGA-TGGGGGTAAA-AAAC--TGGATGTTCCTAAGGTGTCCCCAAATCAGTATAGGGTGTTTGAG-GTGGTTTTGCCAAACCCCAACAAATTTGC
Equus_caballus_papillomavirus_1_isolate_G2_complete_genome_MN164462.1	7611	5310	5460	NODE_320_length_790_cov_1.193548	308	161	154	72.078	1.37e-08	ATATTTTATCATGGCAACAGTGAGCGCTTGCTTACAGTGGGCCATCCCTATTTTGC-ACTTAAGGA-TGGGGGTAAA-AAAC--TGGATGTTCCTAAGGTGTCCCCAAATCAGTATAGGGTGTTTGAG-GTGGTTTTGCCAAACCCCAACAAAT
Equus_caballus_papillomavirus_1_strain_150904_complete_genome_MF288893.1	7613	2406	2547	NODE_98_length_1475_cov_1.992132	180	321	142	71.831	1.78e-13	GAACATTGGGCCTCTTTCTTTACAAGGTGGTGGAAACGCCTAGATCTCAGTGAACCAGAGGACGAAGGGGAAGATGGAGAGGCTACGGAAAGCTTTAGATGCTGTTCTAGAAGAGCAGATGCTTCTCTATGAGGGGGGCAGC
Equus_caballus_papillomavirus_1_isolate_G2_complete_genome_MN164462.1	7611	2406	2547	NODE_98_length_1475_cov_1.992132	180	321	142	71.831	1.78e-13	GAACATTGGGCCTCTTTCTTTACAAGGTGGTGGAAACGCCTAGATCTCAGTGAACCAGAGGACGAAGGGGAAGATGGAGAGGCTACGGAAAGCTTTAGATGCTGTTCTAGAAGAGCAGATGCTTCTCTATGAGGGGGGCAGC
Equus_caballus_papillomavirus_type_1_complete_genome_AF498323.1	7610	2406	2547	NODE_98_length_1475_cov_1.992132	180	321	142	71.831	1.78e-13	GAACATTGGGCCTCTTTCTTTACAAGGTGGTGGAAACGCCTAGATCTCAGTGAACCAGAGGACGAAGGGGAAGATGGAGAGGCTACGGAAAGCTTTAGATGCTGTTCTAGAAGAGCAGATGCTTCTCTATGAGGGGGGCAGC
Equus_caballus_papillomavirus_type_1_complete_genome_NC_003748.1	7610	2406	2547	NODE_98_length_1475_cov_1.992132	180	321	142	71.831	1.78e-13	GAACATTGGGCCTCTTTCTTTACAAGGTGGTGGAAACGCCTAGATCTCAGTGAACCAGAGGACGAAGGGGAAGATGGAGAGGCTACGGAAAGCTTTAGATGCTGTTCTAGAAGAGCAGATGCTTCTCTATGAGGGGGGCAGC
Equine_papillomavirus_type_6_complete_genome_JQ965698.1	7551	2800	2935	NODE_98_length_1475_cov_1.992132	520	655	137	67.883	0.004	GAGCCCTGGACAATGACTGACACCAGTCATGAAACCTTTTGTGCAGCACCAACAGAGACCTTTAAAAAAGAGGGCA-GTGTGGTAACTGTGACATTTGATGGTGAAAGGGGGAATGACATGTGGTACACAAAATGGG
Equine_papillomavirus_type_6_complete_genome_NC_020500.1	7551	2800	2935	NODE_98_length_1475_cov_1.992132	520	655	137	67.883	0.004	GAGCCCTGGACAATGACTGACACCAGTCATGAAACCTTTTGTGCAGCACCAACAGAGACCTTTAAAAAAGAGGGCA-GTGTGGTAACTGTGACATTTGATGGTGAAAGGGGGAATGACATGTGGTACACAAAATGGG
Equus_ferus_caballus_papillomavirus_type_7_complete_genome_JX035935.1	7619	2792	2926	NODE_98_length_1475_cov_1.992132	514	648	135	67.407	0.000302	GCAGAGGAGCCCTGGACAATGACTGACACCAGTCATGAAACCTTTTGTGCAGCACCAACAGAGACCTTTAAAAAAGAGGGCAGTGTGGTAACTGTGACATTTGATGGTGAAAGGGGGAATGACATGTGGTACACA
Equus_ferus_caballus_papillomavirus_type_7_complete_genome_NC_020501.1	7619	2792	2926	NODE_98_length_1475_cov_1.992132	514	648	135	67.407	0.000302	GCAGAGGAGCCCTGGACAATGACTGACACCAGTCATGAAACCTTTTGTGCAGCACCAACAGAGACCTTTAAAAAAGAGGGCAGTGTGGTAACTGTGACATTTGATGGTGAAAGGGGGAATGACATGTGGTACACA
Equine_papillomavirus_type_6_complete_genome_JQ965698.1	7551	3912	4030	NODE_142_length_1221_cov_1.395979	103	221	121	69.421	0.000299	AGGGCGGCGGTAGAGGACCTTTACAAACAGTGCATAATGGGTGCTGAT--TGCCCGCCCGATGTGAGACCCCGAGTGGAAGGGGACACATTGGCTGACCGGATTTTGAAATGGGTCAGCTC
Equine_papillomavirus_type_6_complete_genome_NC_020500.1	7551	3912	4030	NODE_142_length_1221_cov_1.395979	103	221	121	69.421	0.000299	AGGGCGGCGGTAGAGGACCTTTACAAACAGTGCATAATGGGTGCTGAT--TGCCCGCCCGATGTGAGACCCCGAGTGGAAGGGGACACATTGGCTGACCGGATTTTGAAATGGGTCAGCTC
Equus_caballus_papillomavirus_2_isolate_XJ-ks1391_complete_genome_MW410986.1	7802	7237	7339	NODE_1272_length_428_cov_2.116809	351	258	106	74.528	1.4e-08	ATGTGTCATGGTGTTTCATTGCACCGCGCCCGGTTCTGGCATTCAA--ACCCA------CCCT----CTGAGCGCTGCTGGTACAGGTATAAGACCGCACCTGGTG
Equine_papillomavirus_2_isolate_Zurich_2009_HM461973.1_complete_genome	7803	7238	7340	NODE_1272_length_428_cov_2.116809	351	258	106	75.472	3.3e-10	ATGTGTCATGGTGTTTCATTGCACCGCGCCCGGTTCTGGCATTCAA--ACCCA------CCCT----CTGAGCGCTGCTGGTACAGGTATAAGACCGCACCTGGTG
Equine_papillomavirus_2_complete_genome_EU503122.1	7802	7237	7339	NODE_1272_length_428_cov_2.116809	351	258	106	75.472	3.3e-10	ATGTGTCATGGTGTTTCATTGCACCGCGCCCGGTTCTGGCATTCAA--ACCCA------CCCT----CTGAGCGCTGCTGGTACAGGTATAAGACCGCACCTGGTG
Equine_papillomavirus_2_complete_genome_NC_012123.1	7802	7237	7339	NODE_1272_length_428_cov_2.116809	351	258	106	75.472	3.3e-10	ATGTGTCATGGTGTTTCATTGCACCGCGCCCGGTTCTGGCATTCAA--ACCCA------CCCT----CTGAGCGCTGCTGGTACAGGTATAAGACCGCACCTGGTG
Equine_papillomavirus_3_isolate_Haflinger_GU384895.1_complete_genome	7582	693	789	NODE_43_length_2268_cov_2.465997	1353	1251	106	69.811	0.001	GAGGATATAATGGA---CGCTGACCCAGGTACAAGCCCCGGGGAGGGGTGCAGCGGAGCATGCTTCATTTTAAGGGAGGCACAGTGCAGCGACCCTGATAGCGGGG
Equine_papillomavirus_3_complete_genome_NC_017862.1	7582	693	789	NODE_43_length_2268_cov_2.465997	1353	1251	106	69.811	0.001	GAGGATATAATGGA---CGCTGACCCAGGTACAAGCCCCGGGGAGGGGTGCAGCGGAGCATGCTTCATTTTAAGGGAGGCACAGTGCAGCGACCCTGATAGCGGGG
Equus_ferus_caballus_papillomavirus_type_5_complete_genome_JQ031033.1	7519	1212	1309	NODE_43_length_2268_cov_2.465997	825	728	99	73.737	5.75e-07	GCGGCTATGCTTGCGCGCTTTAAAGAAGCCTTTGAGGTCAGCTATACAGAACTCACCAGAGACTTTAAGAGTAATAAGACATG-TACTGGGGACTGGGT
Equus_ferus_caballus_papillomavirus_type_5_complete_genome_NC_020084.1	7519	1212	1309	NODE_43_length_2268_cov_2.465997	825	728	99	73.737	5.75e-07	GCGGCTATGCTTGCGCGCTTTAAAGAAGCCTTTGAGGTCAGCTATACAGAACTCACCAGAGACTTTAAGAGTAATAAGACATG-TACTGGGGACTGGGT
Equine_papillomavirus_type_6_complete_genome_JQ965698.1	7551	2494	2591	NODE_98_length_1475_cov_1.992132	220	311	98	69.388	0.004	TAGATCTCAGTGAACCAGAGGACGAAGG------GGAAGATGGAGAGGCTACGGAAAGCTTTAGATGCTGTTCTAGAAGAGCAGATGCTTCTCTATGA
Equine_papillomavirus_type_6_complete_genome_NC_020500.1	7551	2494	2591	NODE_98_length_1475_cov_1.992132	220	311	98	69.388	0.004	TAGATCTCAGTGAACCAGAGGACGAAGG------GGAAGATGGAGAGGCTACGGAAAGCTTTAGATGCTGTTCTAGAAGAGCAGATGCTTCTCTATGA
Equus_ferus_caballus_papillomavirus_type_5_complete_genome_JQ031033.1	7519	3013	3102	NODE_98_length_1475_cov_1.992132	766	855	90	71.111	0.000298	TTTGCTGAGGATGCTAACAGGTATGGCAAACATGGAACATGGGAGGTGAAAGATGGTAATGAAACCTTCTATCATCCTCTTGTCACCAGC
Equus_ferus_caballus_papillomavirus_type_5_complete_genome_NC_020084.1	7519	3013	3102	NODE_98_length_1475_cov_1.992132	766	855	90	71.111	0.000298	TTTGCTGAGGATGCTAACAGGTATGGCAAACATGGAACATGGGAGGTGAAAGATGGTAATGAAACCTTCTATCATCCTCTTGTCACCAGC
Equus_caballus_papillomavirus_8_strain_NCSU_complete_genome_KU963288.1	8155	3655	3728	NODE_2607_length_343_cov_0.699248	107	178	74	71.622	0.17	GGGTGCAGGGGGAGGGCCGAGCCGGTCACCGCCCCCGGCCCC--TCCCCGGCCCCGCCCCGCGCCGCTCCGACC
Equus_caballus_papillomavirus_8_strain_NCSU_complete_genome_NC_031756.1	8155	3655	3728	NODE_2607_length_343_cov_0.699248	107	178	74	71.622	0.17	GGGTGCAGGGGGAGGGCCGAGCCGGTCACCGCCCCCGGCCCC--TCCCCGGCCCCGCCCCGCGCCGCTCCGACC
Equus_ferus_caballus_papillomavirus_type_5_complete_genome_JQ031033.1	7519	614	682	NODE_43_length_2268_cov_2.465997	1390	1322	69	73.913	0.001	GACCTTGGCATAATCTGCCCCGCTTGCGCCACCACGCGAGGATATAATGGACGCTGACCCAGGTACAAG
Equus_ferus_caballus_papillomavirus_type_5_complete_genome_NC_020084.1	7519	614	682	NODE_43_length_2268_cov_2.465997	1390	1322	69	73.913	0.001	GACCTTGGCATAATCTGCCCCGCTTGCGCCACCACGCGAGGATATAATGGACGCTGACCCAGGTACAAG
Equus_caballus_papillomavirus_8_strain_NCSU_complete_genome_KU963288.1	8155	3822	3879	NODE_61_length_1803_cov_3.408459	1416	1475	60	81.667	7.59e-06	CCCGCCCGCACCCCCAGCCCCGGCCCCAGCCCCAGCCCCCGCCCCCACCGGCGGCCCCAG
Equus_caballus_papillomavirus_8_strain_NCSU_complete_genome_NC_031756.1	8155	3822	3879	NODE_61_length_1803_cov_3.408459	1416	1475	60	81.667	7.59e-06	CCCGCCCGCACCCCCAGCCCCGGCCCCAGCCCCAGCCCCCGCCCCCACCGGCGGCCCCAG
Equus_caballus_papillomavirus_8_strain_NCSU_complete_genome_KU963288.1	8155	3849	3903	NODE_3670_length_308_cov_1.272727	232	184	55	78.182	0.000323	GCCCGAGCCCGAGCCCAAGCCCGAGCCCGAG------CCCGAGCCCGAGGCCCAG
Equus_caballus_papillomavirus_8_strain_NCSU_complete_genome_NC_031756.1	8155	3849	3903	NODE_3670_length_308_cov_1.272727	232	184	55	78.182	0.000323	GCCCGAGCCCGAGCCCAAGCCCGAGCCCGAG------CCCGAGCCCGAGGCCCAG
Equus_caballus_papillomavirus_8_strain_NCSU_complete_genome_KU963288.1	8155	3825	3876	NODE_3670_length_308_cov_1.272727	232	181	52	86.538	4.2e-09	GCCCGAGCCCGAGCCCAAGCCCGAGCCCGAGCCCGAGCCCGAGGCCCAGCCC
Equus_caballus_papillomavirus_8_strain_NCSU_complete_genome_NC_031756.1	8155	3825	3876	NODE_3670_length_308_cov_1.272727	232	181	52	86.538	4.2e-09	GCCCGAGCCCGAGCCCAAGCCCGAGCCCGAGCCCGAGCCCGAGGCCCAGCCC
Equus_caballus_papillomavirus_8_strain_NCSU_complete_genome_KU963288.1	8155	3820	3868	NODE_61_length_1803_cov_3.408459	1427	1476	50	86	6.23e-07	CCCCAGCCCCGGCCCCAGCCCCAGCCCCCGCCCCCACCGGCGGCCCCAGC
Equus_caballus_papillomavirus_8_strain_NCSU_complete_genome_KU963288.1	8155	3818	3867	NODE_1280_length_428_cov_0.860399	179	225	50	78	0.048	AGCCCCAGCCCCAGCACCA---CCAGCACCACTTCCAGCACCAGCACCAG
Equus_caballus_papillomavirus_8_strain_NCSU_complete_genome_NC_031756.1	8155	3820	3868	NODE_61_length_1803_cov_3.408459	1427	1476	50	86	6.23e-07	CCCCAGCCCCGGCCCCAGCCCCAGCCCCCGCCCCCACCGGCGGCCCCAGC
Equus_caballus_papillomavirus_8_strain_NCSU_complete_genome_NC_031756.1	8155	3818	3867	NODE_1280_length_428_cov_0.860399	179	225	50	78	0.048	AGCCCCAGCCCCAGCACCA---CCAGCACCACTTCCAGCACCAGCACCAG
Equus_caballus_papillomavirus_1_strain_150904_complete_genome_MF288893.1	7613	5136	5184	NODE_320_length_790_cov_1.193548	469	421	49	79.592	0.001	CTTTGACCTGCACCCCTCACTCCTGAGGCGCAAGAGGAAACGGAGGTAT
Equus_caballus_papillomavirus_1_isolate_G2_complete_genome_MN164462.1	7611	5136	5181	NODE_320_length_790_cov_1.193548	469	421	49	77.551	0.16	CTTTGACCTGCACCCCTCACTCCTGAGGCGCAAGAGGAAACGGAGGTAT
Equus_caballus_papillomavirus_type_1_complete_genome_AF498323.1	7610	5136	5181	NODE_320_length_790_cov_1.193548	469	421	49	77.551	0.16	CTTTGACCTGCACCCCTCACTCCTGAGGCGCAAGAGGAAACGGAGGTAT
Equus_caballus_papillomavirus_type_1_complete_genome_NC_003748.1	7610	5136	5181	NODE_320_length_790_cov_1.193548	469	421	49	77.551	0.16	CTTTGACCTGCACCCCTCACTCCTGAGGCGCAAGAGGAAACGGAGGTAT
Equus_caballus_papillomavirus_8_strain_NCSU_complete_genome_KU963288.1	8155	3831	3879	NODE_3670_length_308_cov_1.272727	232	184	49	85.714	1.79e-07	GCCCGAGCCCGAGCCCAAGCCCGAGCCCGAGCCCGAGCCCGAGGCCCAG
Equus_caballus_papillomavirus_8_strain_NCSU_complete_genome_NC_031756.1	8155	3831	3879	NODE_3670_length_308_cov_1.272727	232	184	49	85.714	1.79e-07	GCCCGAGCCCGAGCCCAAGCCCGAGCCCGAGCCCGAGCCCGAGGCCCAG
Equus_caballus_papillomavirus_2_isolate_XJ-ks1391_complete_genome_MW410986.1	7802	3006	3053	NODE_98_length_1475_cov_1.992132	492	539	48	77.083	0.16	AAGCCTGGCACAGTCCGCCTTTGCAGAGGAGCCCTGGACAATGACTGA
Equine_papillomavirus_2_isolate_Zurich_2009_HM461973.1_complete_genome	7803	3007	3054	NODE_98_length_1475_cov_1.992132	492	539	48	77.083	0.16	AAGCCTGGCACAGTCCGCCTTTGCAGAGGAGCCCTGGACAATGACTGA
Equine_papillomavirus_2_complete_genome_EU503122.1	7802	3006	3053	NODE_98_length_1475_cov_1.992132	492	539	48	77.083	0.16	AAGCCTGGCACAGTCCGCCTTTGCAGAGGAGCCCTGGACAATGACTGA
Equine_papillomavirus_2_complete_genome_NC_012123.1	7802	3006	3053	NODE_98_length_1475_cov_1.992132	492	539	48	77.083	0.16	AAGCCTGGCACAGTCCGCCTTTGCAGAGGAGCCCTGGACAATGACTGA
Equus_ferus_caballus_papillomavirus_type_7_complete_genome_JX035935.1	7619	789	834	NODE_43_length_2268_cov_2.465997	1282	1237	46	78.261	0.045	GGAGGCACAGTGCAGCGACCCTGATAGCGGGGATGATGAGGGAGAC
Equus_ferus_caballus_papillomavirus_type_7_complete_genome_NC_020501.1	7619	789	834	NODE_43_length_2268_cov_2.465997	1282	1237	46	78.261	0.045	GGAGGCACAGTGCAGCGACCCTGATAGCGGGGATGATGAGGGAGAC
Equus_caballus_papillomavirus_8_strain_NCSU_complete_genome_KU963288.1	8155	3672	3717	NODE_3670_length_308_cov_1.272727	235	190	46	80.435	0.004	CGGGCCCGAGCCCGAGCCCAAGCCCGAGCCCGAGCCCGAGCCCGAG
Equus_caballus_papillomavirus_8_strain_NCSU_complete_genome_NC_031756.1	8155	3672	3717	NODE_3670_length_308_cov_1.272727	235	190	46	80.435	0.004	CGGGCCCGAGCCCGAGCCCAAGCCCGAGCCCGAGCCCGAGCCCGAG
Equus_caballus_papillomavirus_2_isolate_XJ-ks1391_complete_genome_MW410986.1	7802	7559	7602	NODE_1272_length_428_cov_2.116809	83	40	44	77.273	0.56	TGCCCTGGAATGTGCAACCCTAGCGGTCTTCACCGGGTGCGGTG
Equine_papillomavirus_2_isolate_Zurich_2009_HM461973.1_complete_genome	7803	7560	7603	NODE_1272_length_428_cov_2.116809	83	40	44	77.273	0.56	TGCCCTGGAATGTGCAACCCTAGCGGTCTTCACCGGGTGCGGTG
Equine_papillomavirus_2_complete_genome_EU503122.1	7802	7559	7602	NODE_1272_length_428_cov_2.116809	83	40	44	77.273	0.56	TGCCCTGGAATGTGCAACCCTAGCGGTCTTCACCGGGTGCGGTG
Equine_papillomavirus_2_complete_genome_NC_012123.1	7802	7559	7602	NODE_1272_length_428_cov_2.116809	83	40	44	77.273	0.56	TGCCCTGGAATGTGCAACCCTAGCGGTCTTCACCGGGTGCGGTG
Equus_caballus_papillomavirus_8_strain_NCSU_complete_genome_KU963288.1	8155	3677	3719	NODE_3670_length_308_cov_1.272727	236	194	43	79.07	0.17	CCGGGCCCGAGCCCGAGCCCAAGCCCGAGCCCGAGCCCGAGCC
Equus_caballus_papillomavirus_8_strain_NCSU_complete_genome_NC_031756.1	8155	3677	3719	NODE_3670_length_308_cov_1.272727	236	194	43	79.07	0.17	CCGGGCCCGAGCCCGAGCCCAAGCCCGAGCCCGAGCCCGAGCC
Equus_caballus_papillomavirus_8_strain_NCSU_complete_genome_KU963288.1	8155	3820	3857	NODE_3677_length_308_cov_1.034632	120	156	40	85	0.17	CCCCAGCCCCAGCCCCCAGCCCCGG---CAGCCGCCAGCC
Equus_caballus_papillomavirus_8_strain_NCSU_complete_genome_NC_031756.1	8155	3820	3857	NODE_3677_length_308_cov_1.034632	120	156	40	85	0.17	CCCCAGCCCCAGCCCCCAGCCCCGG---CAGCCGCCAGCC
Equus_caballus_papillomavirus_8_strain_NCSU_complete_genome_KU963288.1	8155	3820	3858	NODE_61_length_1803_cov_3.408459	1421	1459	39	89.744	2.18e-06	CCGCACCCCCAGCCCCGGCCCCAGCCCCAGCCCCCGCCC
Equus_caballus_papillomavirus_8_strain_NCSU_complete_genome_NC_031756.1	8155	3820	3858	NODE_61_length_1803_cov_3.408459	1421	1459	39	89.744	2.18e-06	CCGCACCCCCAGCCCCGGCCCCAGCCCCAGCCCCCGCCC
Equus_caballus_papillomavirus_2_isolate_XJ-ks1391_complete_genome_MW410986.1	7802	5503	5539	NODE_9537_length_240_cov_0.760736	107	71	37	81.081	0.56	CCGAGCGCCCGGGCCCGGAGGAGGCGGCGGCGGCGCC
Equine_papillomavirus_2_complete_genome_EU503122.1	7802	5503	5539	NODE_9537_length_240_cov_0.760736	107	71	37	81.081	0.56	CCGAGCGCCCGGGCCCGGAGGAGGCGGCGGCGGCGCC
Equine_papillomavirus_2_complete_genome_NC_012123.1	7802	5503	5539	NODE_9537_length_240_cov_0.760736	107	71	37	81.081	0.56	CCGAGCGCCCGGGCCCGGAGGAGGCGGCGGCGGCGCC
Equus_caballus_papillomavirus_1_strain_150904_complete_genome_MF288893.1	7613	855	890	NODE_43_length_2268_cov_2.465997	1185	1150	36	83.333	0.045	CAGGGAAATTCCCTATCTCTATACCAGCAGCAGGAG
Equus_caballus_papillomavirus_type_1_complete_genome_AF498323.1	7610	855	890	NODE_43_length_2268_cov_2.465997	1185	1150	36	83.333	0.045	CAGGGAAATTCCCTATCTCTATACCAGCAGCAGGAG
Equus_caballus_papillomavirus_type_1_complete_genome_NC_003748.1	7610	855	890	NODE_43_length_2268_cov_2.465997	1185	1150	36	83.333	0.045	CAGGGAAATTCCCTATCTCTATACCAGCAGCAGGAG
Equus_caballus_papillomavirus_1_strain_150904_complete_genome_MF288893.1	7613	6361	6395	NODE_135_length_1249_cov_1.934300	705	736	35	82.857	0.54	TTGAACTTT---AGGTACAGCTGTCCCCTGAGAAC
Equus_caballus_papillomavirus_1_isolate_G2_complete_genome_MN164462.1	7611	6358	6392	NODE_135_length_1249_cov_1.934300	705	736	35	82.857	0.54	TTGAACTTT---AGGTACAGCTGTCCCCTGAGAAC
Equus_caballus_papillomavirus_type_1_complete_genome_AF498323.1	7610	6358	6392	NODE_135_length_1249_cov_1.934300	705	736	35	82.857	0.54	TTGAACTTT---AGGTACAGCTGTCCCCTGAGAAC
Equus_caballus_papillomavirus_type_1_complete_genome_NC_003748.1	7610	6358	6392	NODE_135_length_1249_cov_1.934300	705	736	35	82.857	0.54	TTGAACTTT---AGGTACAGCTGTCCCCTGAGAAC
Equine_papillomavirus_3_isolate_Haflinger_GU384895.1_complete_genome	7582	1671	1705	NODE_43_length_2268_cov_2.465997	363	329	35	94.286	5.79e-07	TCACAAATGGTGCAGTGGGCCTATGACAATAACTA
Equine_papillomavirus_3_isolate_Haflinger_GU384895.1_complete_genome	7582	3529	3563	NODE_98_length_1475_cov_1.992132	1270	1304	35	85.714	0.013	GGGAAGCCTAATCAGCTTAAATGTATGCGCTATCG
Equine_papillomavirus_3_complete_genome_NC_017862.1	7582	1671	1705	NODE_43_length_2268_cov_2.465997	363	329	35	94.286	5.79e-07	TCACAAATGGTGCAGTGGGCCTATGACAATAACTA
Equine_papillomavirus_3_complete_genome_NC_017862.1	7582	3529	3563	NODE_98_length_1475_cov_1.992132	1270	1304	35	85.714	0.013	GGGAAGCCTAATCAGCTTAAATGTATGCGCTATCG
Equus_caballus_papillomavirus_8_strain_NCSU_complete_genome_KU963288.1	8155	3819	3853	NODE_1062_length_455_cov_13.402116	282	316	35	82.857	0.17	GCCGCAGCCCCCACCCCGCCCCCCGCCCCAGCCCC
Equus_caballus_papillomavirus_8_strain_NCSU_complete_genome_NC_031756.1	8155	3819	3853	NODE_1062_length_455_cov_13.402116	282	316	35	82.857	0.17	GCCGCAGCCCCCACCCCGCCCCCCGCCCCAGCCCC
Equus_caballus_papillomavirus_8_strain_NCSU_complete_genome_KU963288.1	8155	3674	3707	NODE_3670_length_308_cov_1.272727	215	182	34	88.235	0.001	AGCCCGAGCCCGAGCCCGAGCCCGAGGCCCAGCC
Equus_caballus_papillomavirus_8_strain_NCSU_complete_genome_KU963288.1	8155	3825	3857	NODE_1776_length_384_cov_0.742671	379	346	34	85.294	0.58	GCCCCGGCACCCAGCCCCAGCCCCGGCCTCGGCC
Equus_caballus_papillomavirus_8_strain_NCSU_complete_genome_KU963288.1	8155	3812	3844	NODE_1190_length_438_cov_1.185596	157	124	34	85.294	0.58	AGCCAGGGCGCCAGCCCCCAGCCCCAGCACCAGC
Equus_caballus_papillomavirus_8_strain_NCSU_complete_genome_KU963288.1	8155	3813	3846	NODE_291_length_838_cov_1.245729	201	234	34	82.353	0.58	GCCTAACACCTAGCCCTAGCCCCAGCCCTAGCCC
Equus_caballus_papillomavirus_8_strain_NCSU_complete_genome_NC_031756.1	8155	3674	3707	NODE_3670_length_308_cov_1.272727	215	182	34	88.235	0.001	AGCCCGAGCCCGAGCCCGAGCCCGAGGCCCAGCC
Equus_caballus_papillomavirus_8_strain_NCSU_complete_genome_NC_031756.1	8155	3825	3857	NODE_1776_length_384_cov_0.742671	379	346	34	85.294	0.58	GCCCCGGCACCCAGCCCCAGCCCCGGCCTCGGCC
Equus_caballus_papillomavirus_8_strain_NCSU_complete_genome_NC_031756.1	8155	3812	3844	NODE_1190_length_438_cov_1.185596	157	124	34	85.294	0.58	AGCCAGGGCGCCAGCCCCCAGCCCCAGCACCAGC
Equus_caballus_papillomavirus_8_strain_NCSU_complete_genome_NC_031756.1	8155	3813	3846	NODE_291_length_838_cov_1.245729	201	234	34	82.353	0.58	GCCTAACACCTAGCCCTAGCCCCAGCCCTAGCCC
Equus_caballus_papillomavirus_2_isolate_XJ-ks1391_complete_genome_MW410986.1	7802	3586	3617	NODE_7438_length_251_cov_0.712644	209	177	33	90.909	0.004	CCATCCCTCCCCCGTCCCTCGAGGCCCGGGGCT
Equine_papillomavirus_2_isolate_Zurich_2009_HM461973.1_complete_genome	7803	3587	3618	NODE_7438_length_251_cov_0.712644	209	177	33	90.909	0.004	CCATCCCTCCCCCGTCCCTCGAGGCCCGGGGCT
Equine_papillomavirus_2_complete_genome_EU503122.1	7802	3586	3617	NODE_7438_length_251_cov_0.712644	209	177	33	90.909	0.004	CCATCCCTCCCCCGTCCCTCGAGGCCCGGGGCT
Equine_papillomavirus_2_complete_genome_NC_012123.1	7802	3586	3617	NODE_7438_length_251_cov_0.712644	209	177	33	90.909	0.004	CCATCCCTCCCCCGTCCCTCGAGGCCCGGGGCT
Equus_ferus_caballus_papillomavirus_type_7_complete_genome_JX035935.1	7619	23	55	NODE_8798_length_244_cov_0.736527	11	43	33	84.848	0.16	CTCAGCCAAAGGATGACCAGCTGGAGCTGGAGG
Equus_ferus_caballus_papillomavirus_type_7_complete_genome_NC_020501.1	7619	23	55	NODE_8798_length_244_cov_0.736527	11	43	33	84.848	0.16	CTCAGCCAAAGGATGACCAGCTGGAGCTGGAGG
Equus_caballus_papillomavirus_8_strain_NCSU_complete_genome_KU963288.1	8155	3819	3851	NODE_8788_length_244_cov_0.742515	144	176	33	87.879	0.004	GCCCCACCCCCACGCCCACCCCCAGCCCCAGCC
Equus_caballus_papillomavirus_8_strain_NCSU_complete_genome_KU963288.1	8155	3825	3857	NODE_8788_length_244_cov_0.742515	144	176	33	87.879	0.004	GCCCCACCCCCACGCCCACCCCCAGCCCCAGCC
Equus_caballus_papillomavirus_8_strain_NCSU_complete_genome_KU963288.1	8155	3843	3875	NODE_8788_length_244_cov_0.742515	144	176	33	84.848	0.17	GCCCCACCCCCACGCCCACCCCCAGCCCCAGCC
Equus_caballus_papillomavirus_8_strain_NCSU_complete_genome_NC_031756.1	8155	3819	3851	NODE_8788_length_244_cov_0.742515	144	176	33	87.879	0.004	GCCCCACCCCCACGCCCACCCCCAGCCCCAGCC
Equus_caballus_papillomavirus_8_strain_NCSU_complete_genome_NC_031756.1	8155	3825	3857	NODE_8788_length_244_cov_0.742515	144	176	33	87.879	0.004	GCCCCACCCCCACGCCCACCCCCAGCCCCAGCC
Equus_caballus_papillomavirus_8_strain_NCSU_complete_genome_NC_031756.1	8155	3843	3875	NODE_8788_length_244_cov_0.742515	144	176	33	84.848	0.17	GCCCCACCCCCACGCCCACCCCCAGCCCCAGCC
Equus_caballus_papillomavirus_1_strain_150904_complete_genome_MF288893.1	7613	5695	5726	NODE_247_length_910_cov_2.121248	829	798	32	84.375	0.54	TGGGCTGCACACCTGCAATAGGGGAGCACTGG
Equus_caballus_papillomavirus_1_isolate_G2_complete_genome_MN164462.1	7611	5692	5723	NODE_247_length_910_cov_2.121248	829	798	32	84.375	0.54	TGGGCTGCACACCTGCAATAGGGGAGCACTGG
Equus_caballus_papillomavirus_type_1_complete_genome_AF498323.1	7610	5692	5723	NODE_247_length_910_cov_2.121248	829	798	32	84.375	0.54	TGGGCTGCACACCTGCAATAGGGGAGCACTGG
Equus_caballus_papillomavirus_type_1_complete_genome_NC_003748.1	7610	5692	5723	NODE_247_length_910_cov_2.121248	829	798	32	84.375	0.54	TGGGCTGCACACCTGCAATAGGGGAGCACTGG
Equus_caballus_papillomavirus_2_isolate_XJ-ks1391_complete_genome_MW410986.1	7802	737	768	NODE_3220_length_322_cov_0.755102	148	179	32	84.375	0.56	TCACCGTGTTGCAGATGAGGAAATGGAGCTGG
Equine_papillomavirus_2_isolate_Zurich_2009_HM461973.1_complete_genome	7803	737	768	NODE_3220_length_322_cov_0.755102	148	179	32	84.375	0.56	TCACCGTGTTGCAGATGAGGAAATGGAGCTGG
Equine_papillomavirus_2_complete_genome_EU503122.1	7802	737	768	NODE_3220_length_322_cov_0.755102	148	179	32	84.375	0.56	TCACCGTGTTGCAGATGAGGAAATGGAGCTGG
Equine_papillomavirus_2_complete_genome_NC_012123.1	7802	737	768	NODE_3220_length_322_cov_0.755102	148	179	32	84.375	0.56	TCACCGTGTTGCAGATGAGGAAATGGAGCTGG
Equus_caballus_papillomavirus_8_strain_NCSU_complete_genome_KU963288.1	8155	3818	3847	NODE_61_length_1803_cov_3.408459	1431	1460	30	93.333	0.000323	AGCCCCGGCCCCAGCCCCAGCCCCCGCCCC
Equus_caballus_papillomavirus_8_strain_NCSU_complete_genome_NC_031756.1	8155	3818	3847	NODE_61_length_1803_cov_3.408459	1431	1460	30	93.333	0.000323	AGCCCCGGCCCCAGCCCCAGCCCCCGCCCC
Equus_caballus_papillomavirus_2_isolate_XJ-ks1391_complete_genome_MW410986.1	7802	3393	3421	NODE_3557_length_311_cov_1.572650	232	260	29	89.655	0.046	CGCCGCCCCGCCGGCGAGCGGAGGACGCG
Equine_papillomavirus_2_isolate_Zurich_2009_HM461973.1_complete_genome	7803	3394	3422	NODE_3557_length_311_cov_1.572650	232	260	29	89.655	0.046	CGCCGCCCCGCCGGCGAGCGGAGGACGCG
Equine_papillomavirus_2_complete_genome_EU503122.1	7802	3393	3421	NODE_3557_length_311_cov_1.572650	232	260	29	89.655	0.046	CGCCGCCCCGCCGGCGAGCGGAGGACGCG
Equine_papillomavirus_2_complete_genome_NC_012123.1	7802	3393	3421	NODE_3557_length_311_cov_1.572650	232	260	29	89.655	0.046	CGCCGCCCCGCCGGCGAGCGGAGGACGCG
Equus_ferus_caballus_papillomavirus_type_4_complete_genome_NC_020085.1	7554	4664	4691	NODE_3027_length_328_cov_0.988048	257	284	28	89.286	0.15	CGCAGACAAGCACCCTCTCTGCAGTGGT
Equus_ferus_caballus_papillomavirus_type_4_complete_genome_JQ031032.1	7554	4664	4691	NODE_3027_length_328_cov_0.988048	257	284	28	89.286	0.15	CGCAGACAAGCACCCTCTCTGCAGTGGT
Equus_caballus_papillomavirus_8_strain_NCSU_complete_genome_KU963288.1	8155	3805	3832	NODE_10939_length_233_cov_0.788462	57	30	28	89.286	0.17	GAGCCTGAGCCTGAGCCTGAGCCTCAGC
Equus_caballus_papillomavirus_8_strain_NCSU_complete_genome_NC_031756.1	8155	3805	3832	NODE_10939_length_233_cov_0.788462	57	30	28	89.286	0.17	GAGCCTGAGCCTGAGCCTGAGCCTCAGC
Equus_caballus_papillomavirus_2_isolate_XJ-ks1391_complete_genome_MW410986.1	7802	3354	3380	NODE_98_length_1475_cov_1.992132	840	866	27	88.889	0.56	TCCTCTTGTCACCAGCACCACCGGAGA
Equine_papillomavirus_2_isolate_Zurich_2009_HM461973.1_complete_genome	7803	3355	3381	NODE_98_length_1475_cov_1.992132	840	866	27	88.889	0.56	TCCTCTTGTCACCAGCACCACCGGAGA
Equine_papillomavirus_2_isolate_Zurich_2009_HM461973.1_complete_genome	7803	1084	1110	NODE_7636_length_250_cov_0.716763	30	56	27	88.889	0.56	TTTGTCGACGTTGCCTTTGTCGGCCAG
Equine_papillomavirus_2_complete_genome_EU503122.1	7802	3354	3380	NODE_98_length_1475_cov_1.992132	840	866	27	88.889	0.56	TCCTCTTGTCACCAGCACCACCGGAGA
Equine_papillomavirus_2_complete_genome_NC_012123.1	7802	3354	3380	NODE_98_length_1475_cov_1.992132	840	866	27	88.889	0.56	TCCTCTTGTCACCAGCACCACCGGAGA
Equus_ferus_caballus_papillomavirus_type_4_complete_genome_NC_020085.1	7554	3068	3094	NODE_11397_length_230_cov_1.209150	114	88	27	88.889	0.54	GCAGCACCACCGGCGGAAAGCCCGAGG
Equus_ferus_caballus_papillomavirus_type_4_complete_genome_JQ031032.1	7554	3068	3094	NODE_11397_length_230_cov_1.209150	114	88	27	88.889	0.54	GCAGCACCACCGGCGGAAAGCCCGAGG
Equus_caballus_papillomavirus_2_isolate_XJ-ks1391_complete_genome_MW410986.1	7802	543	568	NODE_11304_length_231_cov_0.798701	107	132	26	92.308	0.046	GCGCCGGCTTTTACCTGGCGCGCCAG
Equine_papillomavirus_2_isolate_Zurich_2009_HM461973.1_complete_genome	7803	543	568	NODE_11304_length_231_cov_0.798701	107	132	26	92.308	0.046	GCGCCGGCTTTTACCTGGCGCGCCAG
Equine_papillomavirus_2_complete_genome_EU503122.1	7802	543	568	NODE_11304_length_231_cov_0.798701	107	132	26	92.308	0.046	GCGCCGGCTTTTACCTGGCGCGCCAG
Equine_papillomavirus_2_complete_genome_NC_012123.1	7802	543	568	NODE_11304_length_231_cov_0.798701	107	132	26	92.308	0.046	GCGCCGGCTTTTACCTGGCGCGCCAG
Equine_papillomavirus_2_isolate_Zurich_2009_HM461973.1_complete_genome	7803	4403	4426	NODE_2155_length_362_cov_0.856140	326	349	24	91.667	0.56	GCGCCGGGTTGGTCAGGGTGGCGG
Equine_papillomavirus_3_isolate_Haflinger_GU384895.1_complete_genome	7582	3744	3767	NODE_9222_length_241_cov_2.262195	60	38	24	95.833	0.54	GTTTATGGCTGAC-TGTGATTTTT
Equine_papillomavirus_3_complete_genome_NC_017862.1	7582	3744	3767	NODE_9222_length_241_cov_2.262195	60	38	24	95.833	0.54	GTTTATGGCTGAC-TGTGATTTTT
Equus_caballus_papillomavirus_8_strain_NCSU_complete_genome_KU963288.1	8155	3817	3840	NODE_6724_length_254_cov_1.728814	172	149	24	91.667	0.58	GAGCCCCAGCCGCAGCCCCAGACC
Equus_caballus_papillomavirus_8_strain_NCSU_complete_genome_KU963288.1	8155	3673	3696	NODE_2005_length_370_cov_1.030717	261	238	24	91.667	0.58	GAGCCCGAGCCCGAGCCGGAGCCC
Equus_caballus_papillomavirus_8_strain_NCSU_complete_genome_NC_031756.1	8155	3817	3840	NODE_6724_length_254_cov_1.728814	172	149	24	91.667	0.58	GAGCCCCAGCCGCAGCCCCAGACC
Equus_caballus_papillomavirus_8_strain_NCSU_complete_genome_NC_031756.1	8155	3673	3696	NODE_2005_length_370_cov_1.030717	261	238	24	91.667	0.58	GAGCCCGAGCCCGAGCCGGAGCCC
Equus_ferus_caballus_papillomavirus_type_4_complete_genome_NC_020085.1	7554	462	483	NODE_975_length_471_cov_1.565990	129	150	22	95.455	0.54	ACGACGAGCACCCTGTCCTCGA
Equus_ferus_caballus_papillomavirus_type_4_complete_genome_JQ031032.1	7554	462	483	NODE_975_length_471_cov_1.565990	129	150	22	95.455	0.54	ACGACGAGCACCCTGTCCTCGA
Equus_ferus_caballus_papillomavirus_type_7_complete_genome_JX035935.1	7619	888	909	NODE_8731_length_244_cov_0.742515	142	121	22	95.455	0.55	GGGGAATTCCTTGGCATTGTTT
Equus_ferus_caballus_papillomavirus_type_7_complete_genome_NC_020501.1	7619	888	909	NODE_8731_length_244_cov_0.742515	142	121	22	95.455	0.55	GGGGAATTCCTTGGCATTGTTT
Equus_caballus_papillomavirus_9_strain_complete_genome_SW_MN117918.1	7656	7635	7656	NODE_1272_length_428_cov_2.116809	428	407	22	100	0.013	CGCCAAGAAGAGGAGGACATGA
Equus_caballus_papillomavirus_9_strain_complete_genome_SW_MN117918.1	7656	5366	5385	NODE_254_length_895_cov_8.193154	583	602	20	100	0.16	GCGCGCAGCCGGGCCTCGGC
Equine_papillomavirus_type_6_complete_genome_JQ965698.1	7551	5077	5095	NODE_104_length_1414_cov_3.713538	122	104	19	100	0.54	CTGAGGGCAATGGGGAGCT
Equine_papillomavirus_type_6_complete_genome_NC_020500.1	7551	5077	5095	NODE_104_length_1414_cov_3.713538	122	104	19	100	0.54	CTGAGGGCAATGGGGAGCT
Equus_ferus_caballus_papillomavirus_type_7_complete_genome_JX035935.1	7619	1454	1472	NODE_1101_length_450_cov_1.142091	190	172	19	100	0.55	ATTTGCAGGCGCTGCTGCA
Equus_ferus_caballus_papillomavirus_type_7_complete_genome_NC_020501.1	7619	1454	1472	NODE_1101_length_450_cov_1.142091	190	172	19	100	0.55	ATTTGCAGGCGCTGCTGCA
