# Supplementary figures and images for: Equus caballus Papillomavirus Type-9 (EcPV9): First Detection in Asymptomatic Italian Horses
Source: MDPI journal article supplement (doi:10.3390/v14092050), 2022-09-15

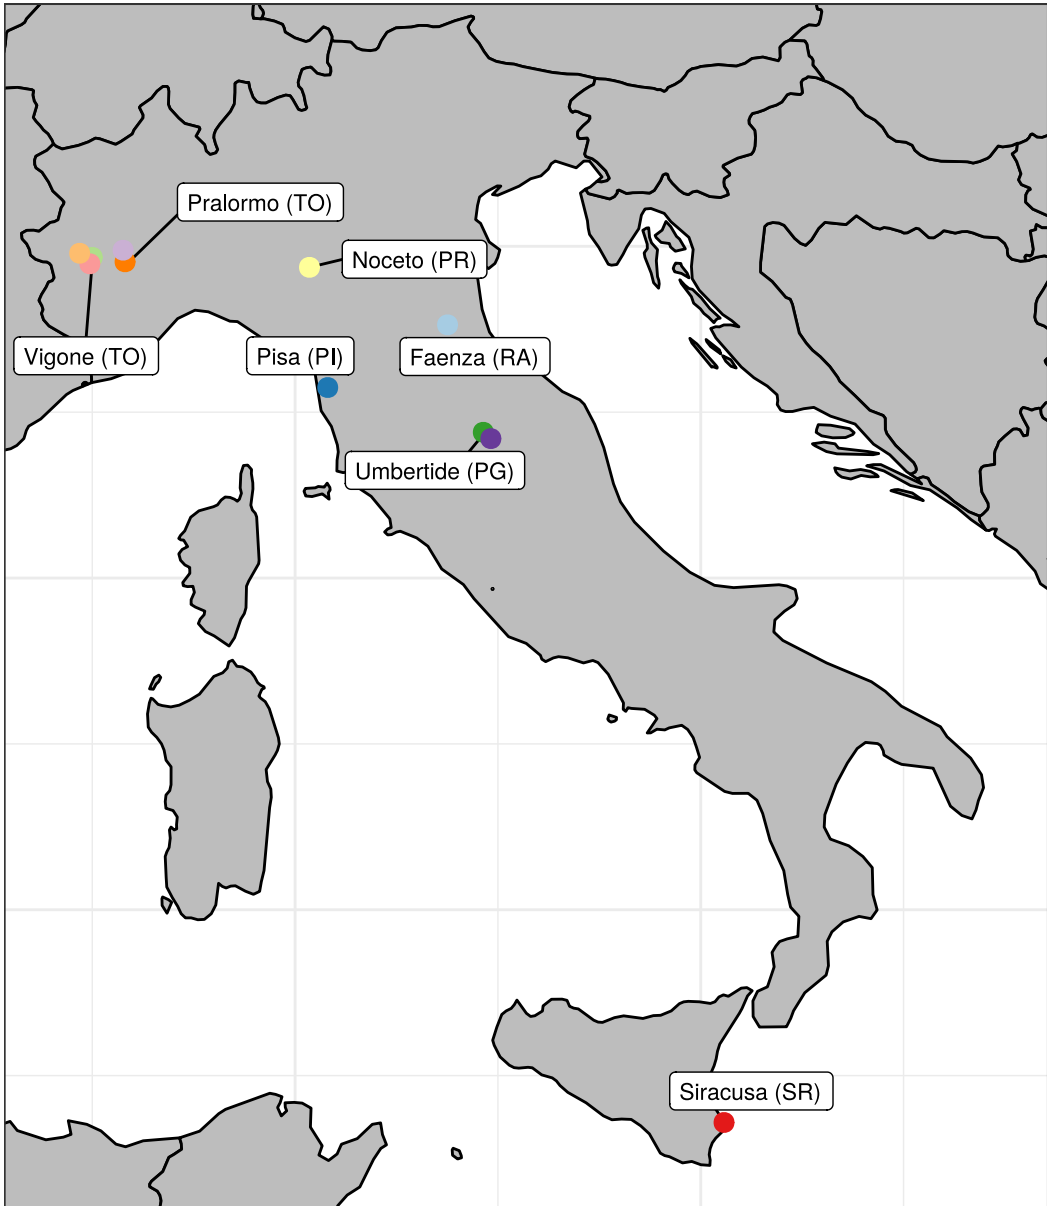

Supplement: s1 [file s1]
